# Supplementary material for: Chromosome-Level Assemblies for the Pine Pitch Canker Pathogen Fusarium circinatum
Source: MDPI journal article supplement (doi:10.3390/pathogens13010070), 2024-01-12
Supplement: s1 [file s1]

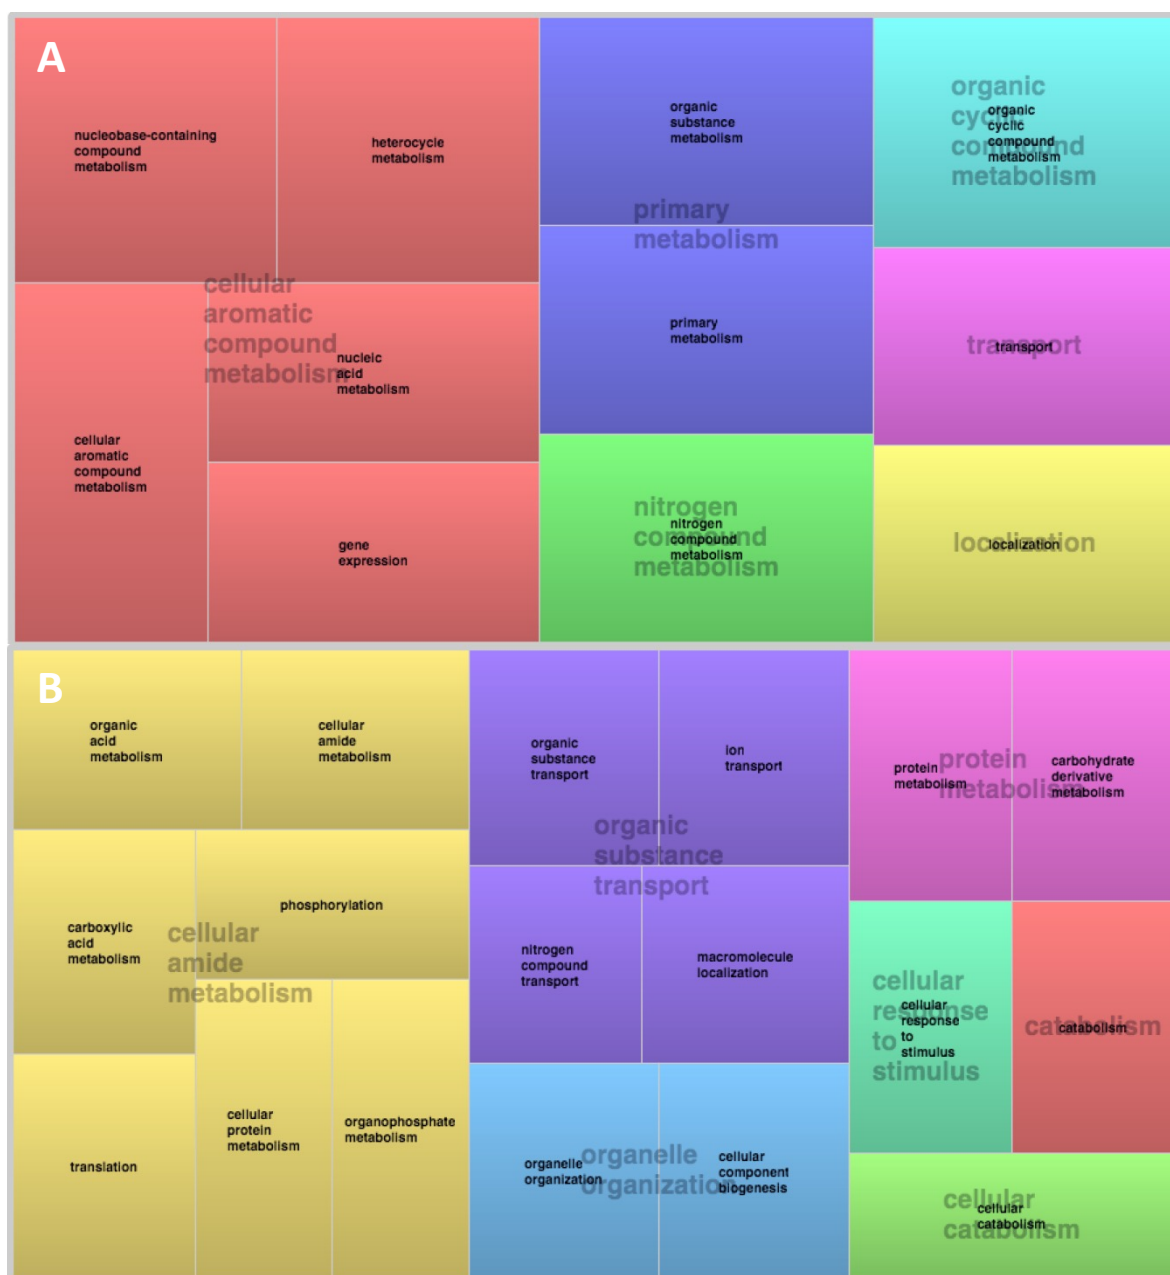

Supplemental Figure S1. REVIGO treemap summarizing GO biological process categories enriched in the accessory chromosome 12 of *F. circinatum* FSP34 (A) and KS17 (B). The enriched GO terms, together with their *P*-values, were subjected to the REVIGO web server to summarize GO terms.
