# Supplementary material for: Chromosome-Level Assemblies for the Pine Pitch Canker Pathogen Fusarium circinatum
Source: MDPI journal article supplement (doi:10.3390/pathogens13010070), 2024-01-12
Supplement: s1 [file s1]

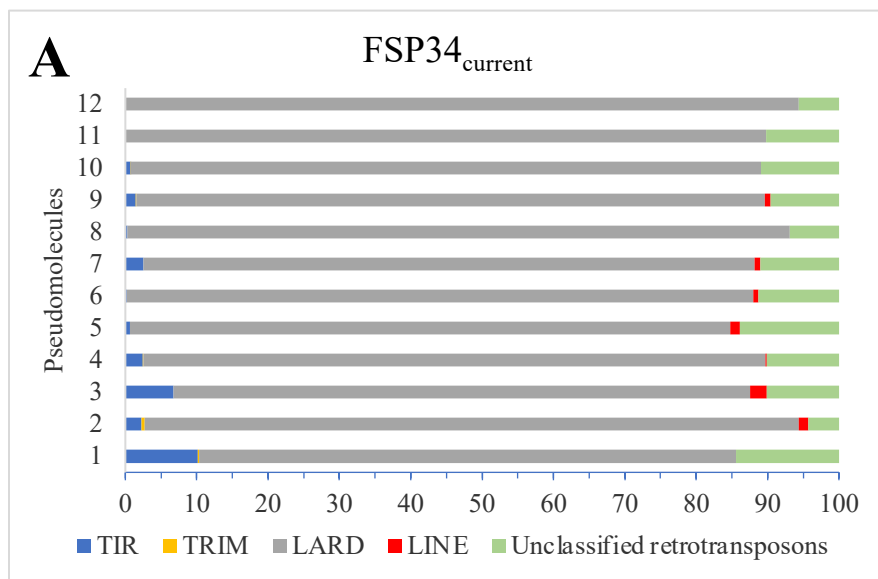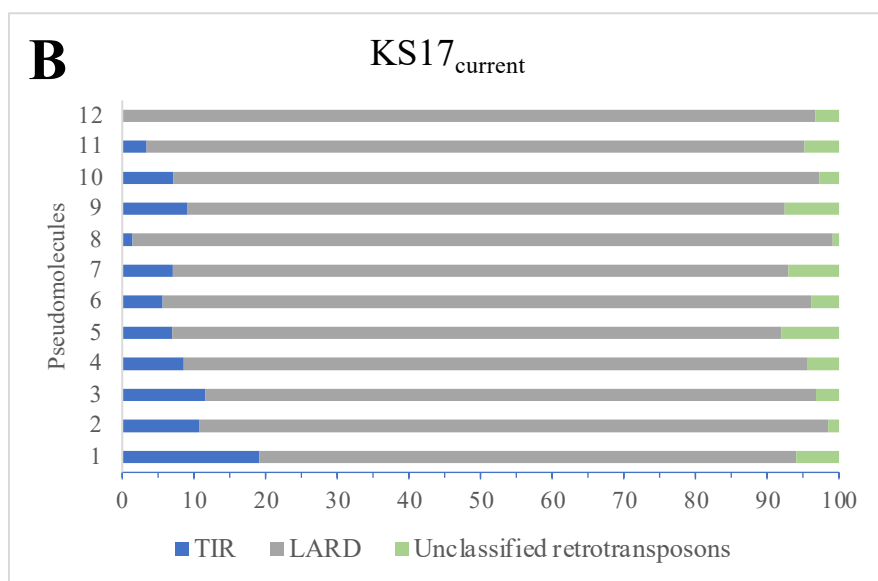

Supplemental Figure S2. Classes and orders of transposable elements (TEs) identified in FSP34<sub>current</sub> (A) and KS17<sub>current</sub> (B), based on the classification of (WICKER *et al.* 2007). The TEs are given as Class I (TRIM - Terminal Repeat transposons in Miniature, LARD - Large Retrotransposon derivatives, LINE - Long Interspersed Nuclear Elements and unclassified - non-autonomous retrotransposon), and Class II (TIR - Terminal Inverted Repeats).
