# Supplementary material for: Chromosome-Level Assemblies for the Pine Pitch Canker Pathogen Fusarium circinatum
Source: Pathogens. 2024 Jan 12;13(1):70. doi: 10.3390/pathogens13010070 (PMC10819268; doi:10.3390/pathogens13010070)
Supplement: Supplementary file 1 [file pathogens-13-00070-s001.zip]

Archive with 5 entries (5 files):
- DeVos et al Figure S1.pdf
- DeVos et al Figure S2.pdf
- DeVos et al Figure S3.pdf
- DeVos et al Figure S4.pdf
- Supplemental Tables_23Dec.xlsx
