# Supplementary material for: Chromosome-Level Assemblies for the Pine Pitch Canker Pathogen Fusarium circinatum
Source: Pathogens. 2024 Jan 12;13(1):70. doi: 10.3390/pathogens13010070 (PMC10819268; doi:10.3390/pathogens13010070)
Supplement: Supplementary file 1 [file pathogens-13-00070-s001.zip › Supplemental Tables_23Dec.xlsx]

## Sheet: Table S1
Table S1. Genomes used for genomic comparisons for the reciprocal translocation between chromosomes 8 and 11.
Species	Strain	Origin	NCBI accession number
F. circinatum	KS17	South Africa	This article
	FSP34	USA	This article
	FFRA	Colombia	GCA_021436885.1
	FSOR	Colombia	GCA_021513745.1
	UG10	South Africa	GCA_024514935.1
	UG27	South Africa	GCA_021513755.1
	CMWF560	Mexico	GCA_024056715.1
	CMWF567	Mexico	GCA_021436905.1
	CMWF1803	Mexico	GCA_024047395.1
	GL1327	Laboratory strain	GCA_000876485.1
F. pilosicola	CMWF 1183	USA	GCA_020615335.1
F. marasasianum	CMW 25512	Mexico	GCA_022833035.1
F. pininemorale	CMW 25243	Mexico	GCA_002165215.1
F. sororula	CMW 25513	Mexico	GCA_017579625.1
F. fracticaudum	CBS 137234	Mexico	GCA_003353625.1
F. temperatum	Netza9	Mexico	GCA_001513835.1

## Sheet: Table S2
Table S2. Locations of the putative centromeric regions of Fusarium circinatum FSP34 and KS17. Cetromeric positions shown in bold indicate a relative change in position between the two assemblies.
F. circinatum FSP34
Pseudomolecule	Start (bp)	End (bp)	Size (bp)	G+C content (%)	Position1
1	1 671 000	1 694 100	23 100	16.79	Submetacentric
2	2 209 100	2 254 600	45 500	16.72	Metacentric
3	890 100	934 100	44 000	17.47	Subtelomeric
4	2 417 500	2 436 500	19 000	16.98	Metacentric
5	2 733 100	2 757 600	24 500	15.51	Metacentric
6	753 000	787 000	34 000	15.35	Subtelomeric
7	2 037 600	2 062 200	24 600	14.87	Metacentric
8	3 094 900	3 136 900	42 000	16.01	Telocentric
9	1 360 000	1 404 500	44 500	17.67	Metacentric
10	813 500	858 500	45 000	16.24	Submetacentric
11	754 600	807 600	53 000	15.95	Submetacentric
12	0	10 000	10 000	18.97	Telocentric
F. circinatum KS17
Pseudomolecule	Start (bp)	End (bp)	Size (bp)	G+C content (%)	Position1
1	1 651 000	1 666 100	15 100	15.78	Submetacentric
2	2 109 500	2 148 100	38 600	16.09	Metacentric
3	1 101 600	1 124 700	23 000	17.07	Subtelomeric
4	2 360 600	2 384 700	24 100	19.61	Metacentric
5	2 714 900	2 726 200	11 300	16.20	Submetacentric
6	709 100	721 200	12 100	14.46	Subtelomeric
7	1 983 800	1 986 400	2 600	13.92	Metacentric
8	2 290 000	2 322 100	32 100	18.67	Submetacentric
9	1 241 100	1 255 200	14 100	15.10	Metacentric
10	703 600	717 700	14 100	15.70	Submetacentric
11	856 000	878 500	22 500	15.44	Metacentric
12	146 500	174 000	27 500	15.44	Acrocentric
1Position of centromere was as determined by Levan et al. [46]

## Sheet: Table S3
Table S3. Nearest genes to Fusarium circinatum centromeres and synteny with Fusarium fujikuroi and Fusarium verticillioides1.
	F. circinatum FSP34	F. circinatum KS17	Fusarium fujikuroi1	Fusarium verticillioides1
Chromosome 1
Left	genemark-Pseudochromosome_1-processed-gene-16.96	genemark-Pseudomolecule_1-processed-gene-16.89	FFUJ_01581	FVEG_09453
Right	genemark-Pseudochromosome_1-processed-gene-17.16	genemark-Pseudomolecule_1-processed-gene-16.78	FFUJ_01580	FVEG_09453
Chromosome 2
Left	genemark-Pseudochromosome_2-processed-gene-22.36	genemark-Pseudomolecule_2-processed-gene-21.40	FFUJ_04619	FVEG_06492
Right	snap_masked-Pseudochromosome_2-processed-gene-22.15	snap_masked-Pseudomolecule_2-processed-gene-21.25	FFUJ_04618	FVEG_04300
Chromosome 3
Left	genemark-Pseudochromosome_3-processed-gene-9.0	genemark-Pseudomolecule_3-processed-gene-11.2	FFUJ_02435	FVEG_12815
Right	genemark-Pseudochromosome_3-processed-gene-9.2	snap_masked-Pseudomolecule_3-processed-gene-11.41	FFUJ_02436	FVEG_07771
Chromosome 4
Left	snap_masked-Pseudochromosome_4-processed-gene-24.46	snap_masked-Pseudomolecule_4-processed-gene-23.61	FFUJ_13658	FVEG_05101
Right	genemark-Pseudochromosome_4-processed-gene-24.80	genemark-Pseudomolecule_4-processed-gene-24.2	FFUJ_13659	FVEG_12170
Chromosome 5
Left	maker-Pseudochromosome_5-snap-gene-27.3	maker-Pseudomolecule_5-augustus-gene-27.46	FFUJ_07603	FVEG_02570
Right	maker-Pseudochromosome_5-augustus-gene-27.13	No significant similarity	FFUJ_07605	FVEG_08898
Chromosome 6
Left	genemark-Pseudochromosome_6-processed-gene-7.18	snap_masked-Pseudomolecule_6-processed-gene-7.11	FFUJ_05604	FVEG_07159
Right	genemark-Pseudochromosome_6-processed-gene-8.70	genemark-Pseudomolecule_6-processed-gene-7.60	FFUJ_05605	FVEG_02568
Chromosome 7
Left	maker-Pseudochromosome_7-snap-gene-20.11	maker-Pseudomolecule_7-snap-gene-19.4	FFUJ_08498	FVEG_07159
Right	maker-Pseudochromosome_7-snap-gene-20.15	snap_masked-Pseudomolecule_7-processed-gene-20.46	FFUJ_08497	FVEG_14171
Chromosome 8
Left	snap_masked-Pseudochromosome_8-processed-gene-30.108	snap_masked-Pseudomolecule_8-processed-gene-22.97	FFUJ_12597	FVEG_13839
Right	genemark-Pseudochromosome_11-processed-gene-7.13	genemark-Pseudomolecule_11-processed-gene-8.58	FFUJ_12598	FVEG_13323
Chromosome 9
Left	genemark-Pseudochromosome_9-processed-gene-13.23	genemark-Pseudomolecule_9-processed-gene-12.20	FFUJ_09746	FVEG_11377
Right	genemark-Pseudochromosome_9-processed-gene-14.10	genemark-Pseudomolecule_9-processed-gene-12.10	FFUJ_09745	FVEG_10477
Chromosome 10
Left	genemark-Pseudochromosome_10-processed-gene-8.13	genemark-Pseudomolecule_10-processed-gene-7.20	FFUJ_10474	FVEG_13588
Right	snap_masked-Pseudochromosome_10-processed-gene-8.37	snap_masked-Pseudomolecule_10-processed-gene-7.44	FFUJ_10475	FVEG_14116
Chromosome 11
Left	genemark-Pseudochromosome_8-processed-gene-30.83	genemark-Pseudomolecule_8-processed-gene-29.267	FFUJ_11521	FVEG_12816
Right	maker-Pseudochromosome_11-snap-gene-8.14	maker-Pseudomolecule_11-augustus-gene-8.40	FFUJ_11522	FVEG_10963
Chromosome 12
Left	No significant similarity	No significant similarity	FFUJ_14240	FVEG_13987
Right	maker-Pseudochromosome_12-snap-gene-0.72	maker-Pseudomolecule_12-snap-gene-1.51	FFUJ_14239	FVEG_12883
1As determined by Wiemann et al. [10].

## Sheet: Table S4
Table S4. Functional annotation of F. circinatum FSP34 using Blast2GO.
Predicted gene	Description	Length (amino acids)	e-Value	GO IDs	GO Names	Enzyme Codes	Enzyme Names	InterPro IDs	InterPro GO IDs	InterPro GO Names
genemark-Pseudochromosome_1-processed-gene-16.67	hypothetical protein FOXG_11311	456	0.0	C:GO:0005575	C:cellular_component			Coil (COILS); mobidb-lite (MOBIDB_LITE); mobidb-lite (MOBIDB_LITE); mobidb-lite (MOBIDB_LITE); mobidb-lite (MOBIDB_LITE); mobidb-lite (MOBIDB_LITE); mobidb-lite (MOBIDB_LITE); mobidb-lite (MOBIDB_LITE); mobidb-lite (MOBIDB_LITE); mobidb-lite (MOBIDB_LITE); TRANSMEMBRANE (PHOBIUS); NON_CYTOPLASMIC_DOMAIN (PHOBIUS); CYTOPLASMIC_DOMAIN (PHOBIUS); TMhelix (TMHMM)	no GO terms	no GO terms
maker-Pseudochromosome_1-snap-gene-6.19	related to FAD dependent oxidoreductase	760	0.0	F:GO:0003924; F:GO:0016491; F:GO:0043167	F:GTPase activity; F:oxidoreductase activity; F:ion binding			SM00174 (SMART); G3DSA:3.40.50.300 (GENE3D); G3DSA:3.30.9.10 (GENE3D); IPR001806 (PFAM); IPR006076 (PFAM); IPR036188 (G3DSA:3.50.50.GENE3D); PTHR13847 (PANTHER); PTHR13847:SF213 (PANTHER); IPR027417 (SUPERFAMILY); IPR036188 (SUPERFAMILY)	F:GO:0003924; F:GO:0005525; F:GO:0016491; P:GO:0055114	F:GTPase activity; F:GTP binding; F:oxidoreductase activity; P:oxidation-reduction process
snap_masked-Pseudochromosome_1-processed-gene-4.96	related to heterokaryon incompatibility protein	1056	0.0					G3DSA:3.40.50.1580 (GENE3D); IPR010730 (PFAM); mobidb-lite (MOBIDB_LITE); PTHR24148 (PANTHER); PTHR24148:SF57 (PANTHER)	no GO terms	no GO terms
genemark-Pseudochromosome_1-processed-gene-7.16	probable protein kinase PAK1	1168	0.0	P:GO:0006464; F:GO:0016301; F:GO:0043167	P:cellular protein modification process; F:kinase activity; F:ion binding			IPR000719 (SMART); IPR000719 (PFAM); G3DSA:1.10.510.10 (GENE3D); G3DSA:3.30.200.20 (GENE3D); mobidb-lite (MOBIDB_LITE); mobidb-lite (MOBIDB_LITE); mobidb-lite (MOBIDB_LITE); mobidb-lite (MOBIDB_LITE); mobidb-lite (MOBIDB_LITE); mobidb-lite (MOBIDB_LITE); mobidb-lite (MOBIDB_LITE); mobidb-lite (MOBIDB_LITE); mobidb-lite (MOBIDB_LITE); mobidb-lite (MOBIDB_LITE); mobidb-lite (MOBIDB_LITE); PTHR44035…	F:GO:0004672; F:GO:0005524; P:GO:0006468	F:protein kinase activity; F:ATP binding; P:protein phosphorylation
genemark-Pseudochromosome_1-processed-gene-15.79	MKL/myocardin-like protein 2	114	3.66966E-72					IPR004018 (SMART); IPR004018 (PFAM); G3DSA:1.10.288.20 (GENE3D); mobidb-lite (MOBIDB_LITE); mobidb-lite (MOBIDB_LITE); mobidb-lite (MOBIDB_LITE); PTHR22793 (PANTHER); IPR004018 (PROSITE_PROFILES)	no GO terms	no GO terms
maker-Pseudochromosome_1-snap-gene-2.4	related to HNM1-Choline permease	534	0.0	C:GO:0005575; F:GO:0022857	C:cellular_component; F:transmembrane transporter activity			G3DSA:1.20.1740.10 (GENE3D); IPR002293 (PFAM); IPR002293 (PIRSF); mobidb-lite (MOBIDB_LITE); mobidb-lite (MOBIDB_LITE); PTHR11785 (PANTHER); PTHR11785:SF511 (PANTHER); TRANSMEMBRANE (PHOBIUS); TRANSMEMBRANE (PHOBIUS); TRANSMEMBRANE (PHOBIUS); TRANSMEMBRANE (PHOBIUS); TRANSMEMBRANE (PHOBIUS); TRANSMEMBRANE (PHOBIUS); NON_CYTOPLASMIC_DOMAIN (PHOBIUS); TRANSMEMBRANE (PHOBIUS); CYTOPLASMIC_DOMAIN (PH…	C:GO:0016020; F:GO:0022857; P:GO:0055085	C:membrane; F:transmembrane transporter activity; P:transmembrane transport
genemark-Pseudochromosome_1-processed-gene-10.28	related to CDC5-protein kinase involved in regulation of DNA replication	302	0.0	P:GO:0006464; P:GO:0009058; F:GO:0016301; F:GO:0043167	P:cellular protein modification process; P:biosynthetic process; F:kinase activity; F:ion binding	EC:2.7.11	Transferring phosphorus-containing groups	IPR000719 (SMART); IPR000719 (PFAM); G3DSA:1.10.510.10 (GENE3D); PTHR44305 (PANTHER); IPR000719 (PROSITE_PROFILES); cd00180 (CDD); IPR011009 (SUPERFAMILY)	F:GO:0004672; F:GO:0005524; P:GO:0006468	F:protein kinase activity; F:ATP binding; P:protein phosphorylation
snap_masked-Pseudochromosome_1-processed-gene-9.35	hypothetical protein FVER14953_09682	108	2.54928E-46					mobidb-lite (MOBIDB_LITE)	no GO terms	no GO terms
genemark-Pseudochromosome_1-processed-gene-7.27	chorismate synthase	393	0.0	P:GO:0006520; P:GO:0009058; F:GO:0016829	P:cellular amino acid metabolic process; P:biosynthetic process; F:lyase activity	EC:4.2.3.5	Chorismate synthase	IPR000453 (PIRSF); IPR035904 (G3DSA:3.60.150.GENE3D); IPR000453 (PFAM); IPR000453 (TIGRFAM); mobidb-lite (MOBIDB_LITE); mobidb-lite (MOBIDB_LITE); IPR000453 (PANTHER); IPR000453 (HAMAP); IPR000453 (CDD); IPR035904 (SUPERFAMILY)	F:GO:0004107; P:GO:0009073	F:chorismate synthase activity; P:aromatic amino acid family biosynthetic process
genemark-Pseudochromosome_1-processed-gene-14.4	probable dicarboxylate carrier protein	309	0.0	C:GO:0005575; F:GO:0022857	C:cellular_component; F:transmembrane transporter activity			IPR023395 (G3DSA:1.50.40.GENE3D); IPR018108 (PFAM); mobidb-lite (MOBIDB_LITE); IPR040062 (PANTHER); PTHR24089:SF39 (PANTHER); TRANSMEMBRANE (PHOBIUS); CYTOPLASMIC_DOMAIN (PHOBIUS); NON_CYTOPLASMIC_DOMAIN (PHOBIUS); IPR018108 (PROSITE_PROFILES); IPR018108 (PROSITE_PROFILES); IPR018108 (PROSITE_PROFILES); IPR023395 (SUPERFAMILY); TMhelix (TMHMM)	F:GO:0022857	F:transmembrane transporter activity
snap_masked-Pseudochromosome_1-processed-gene-6.78	related to permease	567	0.0	C:GO:0005575; P:GO:0055085	C:cellular_component; P:transmembrane transport			G3DSA:1.20.1250.20 (GENE3D); IPR011701 (PFAM); G3DSA:1.20.1250.20 (GENE3D); mobidb-lite (MOBIDB_LITE); mobidb-lite (MOBIDB_LITE); PTHR43791:SF14 (PANTHER); PTHR43791 (PANTHER); CYTOPLASMIC_DOMAIN (PHOBIUS); NON_CYTOPLASMIC_DOMAIN (PHOBIUS); NON_CYTOPLASMIC_DOMAIN (PHOBIUS); TRANSMEMBRANE (PHOBIUS); NON_CYTOPLASMIC_DOMAIN (PHOBIUS); TRANSMEMBRANE (PHOBIUS); CYTOPLASMIC_DOMAIN (PHOBIUS); TRANSMEMBR…	C:GO:0016021; P:GO:0055085	C:integral component of membrane; P:transmembrane transport
augustus_masked-Pseudochromosome_1-processed-gene-9.72	related to 3-oxoadipate enol-lactonase I	518	0.0					IPR000073 (PFAM); IPR029058 (G3DSA:3.40.50.GENE3D); PTHR43039:SF3 (PANTHER); PTHR43039 (PANTHER); IPR029058 (SUPERFAMILY)	no GO terms	no GO terms
genemark-Pseudochromosome_1-processed-gene-11.93	related to sterol glucosyltransferase	1273	0.0	P:GO:0005975; P:GO:0006629; F:GO:0016757	P:carbohydrate metabolic process; P:lipid metabolic process; F:transferase activity, transferring glycosyl groups			Coil (COILS); IPR003903 (SMART); IPR004276 (PFAM); G3DSA:3.40.50.2000 (GENE3D); mobidb-lite (MOBIDB_LITE); mobidb-lite (MOBIDB_LITE); mobidb-lite (MOBIDB_LITE); mobidb-lite (MOBIDB_LITE); mobidb-lite (MOBIDB_LITE); mobidb-lite (MOBIDB_LITE); mobidb-lite (MOBIDB_LITE); mobidb-lite (MOBIDB_LITE); mobidb-lite (MOBIDB_LITE); mobidb-lite (MOBIDB_LITE); mobidb-lite (MOBIDB_LITE); mobidb-lite (MOBIDB_LI…	P:GO:0005975; F:GO:0016758; P:GO:0030259	P:carbohydrate metabolic process; F:transferase activity, transferring hexosyl groups; P:lipid glycosylation
snap_masked-Pseudochromosome_1-processed-gene-2.32	zinc finger protein	130	5.35121E-72	F:GO:0003674; P:GO:0034641; P:GO:0044281	F:molecular_function; P:cellular nitrogen compound metabolic process; P:small molecule metabolic process			G3DSA:3.40.50.1580 (GENE3D); PTHR21234:SF16 (PANTHER); PTHR21234 (PANTHER); IPR035994 (SUPERFAMILY)	F:GO:0003824; P:GO:0009116	F:catalytic activity; P:nucleoside metabolic process
genemark-Pseudochromosome_1-processed-gene-9.9	oxidoreductase	329	0.0					IPR002347 (PRINTS); IPR002347 (PRINTS); IPR002347 (PFAM); G3DSA:3.40.50.720 (GENE3D); PTHR24320 (PANTHER); PTHR24320:SF92 (PANTHER); IPR036291 (SUPERFAMILY)	no GO terms	no GO terms
snap_masked-Pseudochromosome_1-processed-gene-5.90	uncharacterized protein FPRN_00191	300	1.14175E-174					IPR021833 (PFAM); mobidb-lite (MOBIDB_LITE); mobidb-lite (MOBIDB_LITE); PTHR38116 (PANTHER); PTHR38116:SF3 (PANTHER)	no GO terms	no GO terms
snap_masked-Pseudochromosome_1-processed-gene-2.43	related to D-alanine aminotransferase	320	0.0	F:GO:0003674	F:molecular_function			IPR001544 (PFAM); G3DSA:3.20.10.10 (GENE3D); G3DSA:3.30.470.10 (GENE3D); PTHR42743 (PANTHER); IPR036038 (SUPERFAMILY)	F:GO:0003824	F:catalytic activity
genemark-Pseudochromosome_1-processed-gene-2.88	related beta-lactamase	415	0.0					IPR001466 (PFAM); G3DSA:3.40.710.10 (GENE3D); PTHR43283:SF6 (PANTHER); PTHR43283 (PANTHER); IPR012338 (SUPERFAMILY)	no GO terms	no GO terms
genemark-Pseudochromosome_1-processed-gene-11.104	related to Zn-finger protein	619	0.0	F:GO:0043167	F:ion binding			Coil (COILS); IPR001841 (SMART); IPR039512 (PFAM); IPR001841 (PFAM); IPR008913 (PFAM); IPR013083 (G3DSA:3.30.40.GENE3D); G3DSA:2.20.28.10 (GENE3D); mobidb-lite (MOBIDB_LITE); mobidb-lite (MOBIDB_LITE); mobidb-lite (MOBIDB_LITE); mobidb-lite (MOBIDB_LITE); mobidb-lite (MOBIDB_LITE); PTHR21319:SF0 (PANTHER); PTHR21319 (PANTHER); IPR017921 (PROSITE_PROFILES); IPR008913 (PROSITE_PROFILES); IPR001841 …	F:GO:0008270	F:zinc ion binding
genemark-Pseudochromosome_1-processed-gene-11.107	probable CYB2-lactate dehydrogenase cytochrome b2	383	0.0	F:GO:0016491; F:GO:0043167	F:oxidoreductase activity; F:ion binding			IPR000262 (PFAM); IPR012133 (PIRSF); IPR013785 (G3DSA:3.20.20.GENE3D); PTHR10578:SF71 (PANTHER); PTHR10578 (PANTHER); NON_CYTOPLASMIC_DOMAIN (PHOBIUS); SIGNAL_PEPTIDE_N_REGION (PHOBIUS); SIGNAL_PEPTIDE_H_REGION (PHOBIUS); SIGNAL_PEPTIDE_C_REGION (PHOBIUS); SIGNAL_PEPTIDE (PHOBIUS); IPR037396 (PROSITE_PROFILES); IPR037458 (CDD); SignalP-noTM (SIGNALP_EUK); SSF51395 (SUPERFAMILY)	F:GO:0003824; F:GO:0010181; F:GO:0016491; P:GO:0055114	F:catalytic activity; F:FMN binding; F:oxidoreductase activity; P:oxidation-reduction process
genemark-Pseudochromosome_1-processed-gene-6.117	probable PHO88 (involved in phosphate transport)	191	1.33123E-136	C:GO:0005783; P:GO:0006605	C:endoplasmic reticulum; P:protein targeting			IPR012098 (PIRSF); IPR012098 (PFAM); mobidb-lite (MOBIDB_LITE); mobidb-lite (MOBIDB_LITE); IPR012098 (PANTHER); CYTOPLASMIC_DOMAIN (PHOBIUS); NON_CYTOPLASMIC_DOMAIN (PHOBIUS); TRANSMEMBRANE (PHOBIUS); TMhelix (TMHMM)	C:GO:0005783; P:GO:0045047	C:endoplasmic reticulum; P:protein targeting to ER
genemark-Pseudochromosome_1-processed-gene-6.114	probable acetylglutamate kinase/N-acetyl-gamma-glutamyl-phosphate reductase precursor (ARG-6)	485	0.0	C:GO:0005737; P:GO:0006520; P:GO:0009058; F:GO:0016301; F:GO:0016491	C:cytoplasm; P:cellular amino acid metabolic process; P:biosynthetic process; F:kinase activity; F:oxidoreductase activity	EC:2.7.2.8	Acetylglutamate kinase	IPR006855 (PFAM); IPR011242 (PIRSF); IPR036393 (G3DSA:3.40.1160.GENE3D); IPR001048 (PFAM); G3DSA:3.40.630.30 (GENE3D); PTHR23342 (PANTHER); PTHR23342:SF0 (PANTHER); IPR006855 (PROSITE_PROFILES); cd04263 (CDD); IPR036393 (SUPERFAMILY)	F:GO:0003991; C:GO:0005737; P:GO:0006526	F:acetylglutamate kinase activity; C:cytoplasm; P:arginine biosynthetic process
genemark-Pseudochromosome_1-processed-gene-4.18	related to hydrophobin	148	9.90947E-101					SIGNAL_PEPTIDE (PHOBIUS); NON_CYTOPLASMIC_DOMAIN (PHOBIUS); SIGNAL_PEPTIDE_H_REGION (PHOBIUS); SIGNAL_PEPTIDE_C_REGION (PHOBIUS); SIGNAL_PEPTIDE_N_REGION (PHOBIUS); SignalP-noTM (SIGNALP_EUK)	no GO terms	no GO terms
genemark-Pseudochromosome_1-processed-gene-14.20	6-phosphofructo-2-kinase	674	0.0	P:GO:0005975; F:GO:0016301; F:GO:0043167; P:GO:0044281	P:carbohydrate metabolic process; F:kinase activity; F:ion binding; P:small molecule metabolic process	EC:2.7.1.105	6-phosphofructo-2-kinase	IPR003094 (PRINTS); IPR013078 (SMART); IPR013079 (PFAM); IPR013078 (PFAM); mobidb-lite (MOBIDB_LITE); mobidb-lite (MOBIDB_LITE); mobidb-lite (MOBIDB_LITE); mobidb-lite (MOBIDB_LITE); IPR003094 (PANTHER); PTHR10606:SF32 (PANTHER); IPR013078 (CDD); SignalP-TM (SIGNALP_GRAM_POSITIVE); IPR029033 (SUPERFAMILY); IPR027417 (SUPERFAMILY)	F:GO:0003824; F:GO:0003873; F:GO:0005524; P:GO:0006000; P:GO:0006003	F:catalytic activity; F:6-phosphofructo-2-kinase activity; F:ATP binding; P:fructose metabolic process; P:fructose 2,6-bisphosphate metabolic process
genemark-Pseudochromosome_1-processed-gene-4.48	hypothetical protein FOXG_10973	468	0.0	C:GO:0005575	C:cellular_component			CYTOPLASMIC_DOMAIN (PHOBIUS); NON_CYTOPLASMIC_DOMAIN (PHOBIUS); TRANSMEMBRANE (PHOBIUS); TMhelix (TMHMM)	no GO terms	no GO terms
maker-Pseudochromosome_1-augustus-gene-7.10	histone H2A.Z	143	1.09283E-97	F:GO:0003677; C:GO:0005634; C:GO:0005694; C:GO:0032991; P:GO:0051276	F:DNA binding; C:nucleus; C:chromosome; C:protein-containing complex; P:chromosome organization			IPR002119 (PRINTS); IPR002119 (PRINTS); IPR002119 (PRINTS); IPR002119 (PRINTS); IPR002119 (PRINTS); IPR002119 (SMART); IPR009072 (G3DSA:1.10.20.GENE3D); IPR007125 (PFAM); IPR032454 (PFAM); mobidb-lite (MOBIDB_LITE); mobidb-lite (MOBIDB_LITE); PTHR23430 (PANTHER); PTHR23430:SF7 (PANTHER); IPR002119 (CDD); IPR009072 (SUPERFAMILY)	C:GO:0000786; F:GO:0003677; C:GO:0005634; F:GO:0046982	C:nucleosome; F:DNA binding; C:nucleus; F:protein heterodimerization activity
snap_masked-Pseudochromosome_1-processed-gene-4.119	uncharacterized protein Y057_7106	128	1.18819E-83					G3DSA:2.40.350.20 (GENE3D); SIGNAL_PEPTIDE_C_REGION (PHOBIUS); SIGNAL_PEPTIDE_N_REGION (PHOBIUS); SIGNAL_PEPTIDE_H_REGION (PHOBIUS); SIGNAL_PEPTIDE (PHOBIUS); NON_CYTOPLASMIC_DOMAIN (PHOBIUS); SignalP-noTM (SIGNALP_GRAM_NEGATIVE); SignalP-noTM (SIGNALP_EUK)	no GO terms	no GO terms
genemark-Pseudochromosome_1-processed-gene-2.120	related to negative-acting regulatory protein	824	0.0	F:GO:0016491; F:GO:0016829	F:oxidoreductase activity; F:lyase activity	EC:1.1.1.25; EC:4.2.1.10; EC:1.1.1.282	Shikimate dehydrogenase; 3-dehydroquinate dehydratase; Quinate/shikimate dehydrogenase	PR01100 (PRINTS); IPR013708 (PFAM); G3DSA:3.40.50.10860 (GENE3D); IPR013785 (G3DSA:3.20.20.GENE3D); G3DSA:3.40.50.300 (GENE3D); IPR001381 (PFAM); IPR006151 (PFAM); IPR031322 (PFAM); mobidb-lite (MOBIDB_LITE); PTHR21090 (PANTHER); PTHR21090:SF20 (PANTHER); IPR001381 (CDD); IPR036291 (SUPERFAMILY); SSF51569 (SUPERFAMILY); SSF53223 (SUPERFAMILY); IPR027417 (SUPERFAMILY)	F:GO:0003824; F:GO:0003855; F:GO:0004764; P:GO:0055114	F:catalytic activity; F:3-dehydroquinate dehydratase activity; F:shikimate 3-dehydrogenase (NADP+) activity; P:oxidation-reduction process
snap_masked-Pseudochromosome_1-processed-gene-2.40	related to ARO1-arom pentafunctional enzyme	321	0.0	C:GO:0005737; F:GO:0016491	C:cytoplasm; F:oxidoreductase activity	EC:1.1.1.25; EC:1.1.1.282	Shikimate dehydrogenase; Quinate/shikimate dehydrogenase	PF18317 (PFAM); IPR006151 (PFAM); G3DSA:3.40.50.10860 (GENE3D); IPR013708 (PFAM); IPR010110 (TIGRFAM); G3DSA:3.40.50.720 (GENE3D); mobidb-lite (MOBIDB_LITE); PTHR21089:SF1 (PANTHER); PTHR21089 (PANTHER); cd01065 (CDD); IPR036291 (SUPERFAMILY); SSF53223 (SUPERFAMILY)	F:GO:0004764; C:GO:0005737; P:GO:0055114	F:shikimate 3-dehydrogenase (NADP+) activity; C:cytoplasm; P:oxidation-reduction process
genemark-Pseudochromosome_1-processed-gene-12.29	50S ribosomal protein L31e	112	2.01801E-71	F:GO:0003735; C:GO:0005840; P:GO:0006412	F:structural constituent of ribosome; C:ribosome; P:translation			IPR000054 (SMART); IPR023621 (G3DSA:3.10.440.GENE3D); IPR000054 (PFAM); IPR000054 (PANTHER); IPR000054 (PRODOM); IPR023621 (SUPERFAMILY)	F:GO:0003735; C:GO:0005840; P:GO:0006412	F:structural constituent of ribosome; C:ribosome; P:translation
snap_masked-Pseudochromosome_1-processed-gene-9.54	hypothetical protein FOC4_g10007323	376	0.0	F:GO:0003700; C:GO:0005634; P:GO:0009058; P:GO:0034641; F:GO:0043167	F:DNA-binding transcription factor activity; C:nucleus; P:biosynthetic process; P:cellular nitrogen compound metabolic process; F:ion binding			IPR001138 (SMART); IPR001138 (PFAM); IPR036864 (G3DSA:4.10.240.GENE3D); mobidb-lite (MOBIDB_LITE); PTHR31313:SF25 (PANTHER); PTHR31313 (PANTHER); IPR001138 (PROSITE_PROFILES); IPR001138 (CDD); IPR036864 (SUPERFAMILY)	F:GO:0000981; C:GO:0005634; P:GO:0006355; F:GO:0008270	F:DNA-binding transcription factor activity, RNA polymerase II-specific; C:nucleus; P:regulation of transcription, DNA-templated; F:zinc ion binding
snap_masked-Pseudochromosome_1-processed-gene-9.43	-No description-	90						Coil (COILS); mobidb-lite (MOBIDB_LITE); mobidb-lite (MOBIDB_LITE)	no GO terms	no GO terms
maker-Pseudochromosome_1-snap-gene-10.8	related to transcription factors	1554	0.0	P:GO:0000003; F:GO:0003700; C:GO:0005634; P:GO:0007049; P:GO:0007059; P:GO:0009058; P:GO:0022607; P:GO:0034641; F:GO:0043167; P:GO:0051276	P:reproduction; F:DNA-binding transcription factor activity; C:nucleus; P:cell cycle; P:chromosome segregation; P:biosynthetic process; P:cellular component assembly; P:cellular nitrogen compound metabolic process; F:ion binding; P:chromosome organization			IPR013940 (PFAM); IPR011990 (G3DSA:1.25.40.GENE3D); mobidb-lite (MOBIDB_LITE); mobidb-lite (MOBIDB_LITE); mobidb-lite (MOBIDB_LITE); mobidb-lite (MOBIDB_LITE); mobidb-lite (MOBIDB_LITE); IPR039057 (PANTHER); IPR011990 (SUPERFAMILY)	F:GO:0005515; P:GO:0051321; P:GO:0090173	F:protein binding; P:meiotic cell cycle; P:regulation of synaptonemal complex assembly
snap_masked-Pseudochromosome_1-processed-gene-4.116	uncharacterized protein FPRN_00155	524	0.0					no IPS match	no IPS match	no IPS match
snap_masked-Pseudochromosome_1-processed-gene-7.42	-No description-	160						mobidb-lite (MOBIDB_LITE); mobidb-lite (MOBIDB_LITE)	no GO terms	no GO terms
snap_masked-Pseudochromosome_1-processed-gene-10.39	probable ZFR1 regulator of fumonisin biosynthesis	845	0.0	F:GO:0003677; F:GO:0003700; C:GO:0005634; P:GO:0009058; P:GO:0034641; F:GO:0043167	F:DNA binding; F:DNA-binding transcription factor activity; C:nucleus; P:biosynthetic process; P:cellular nitrogen compound metabolic process; F:ion binding			Coil (COILS); IPR001138 (SMART); IPR007219 (SMART); IPR001138 (PFAM); IPR007219 (PFAM); IPR036864 (G3DSA:4.10.240.GENE3D); mobidb-lite (MOBIDB_LITE); mobidb-lite (MOBIDB_LITE); mobidb-lite (MOBIDB_LITE); mobidb-lite (MOBIDB_LITE); mobidb-lite (MOBIDB_LITE); mobidb-lite (MOBIDB_LITE); mobidb-lite (MOBIDB_LITE); mobidb-lite (MOBIDB_LITE); mobidb-lite (MOBIDB_LITE); mobidb-lite (MOBIDB_LITE); PTHR45…	F:GO:0000981; F:GO:0003677; C:GO:0005634; P:GO:0006351; P:GO:0006355; F:GO:0008270	F:DNA-binding transcription factor activity, RNA polymerase II-specific; F:DNA binding; C:nucleus; P:transcription, DNA-templated; P:regulation of transcription, DNA-templated; F:zinc ion binding
genemark-Pseudochromosome_1-processed-gene-11.96	probable ribosomal RNA-processing protein 12	1240	0.0	C:GO:0005634; C:GO:0032991; P:GO:0034641; P:GO:0042254	C:nucleus; C:protein-containing complex; P:cellular nitrogen compound metabolic process; P:ribosome biogenesis			Coil (COILS); IPR012978 (PFAM); mobidb-lite (MOBIDB_LITE); mobidb-lite (MOBIDB_LITE); mobidb-lite (MOBIDB_LITE); mobidb-lite (MOBIDB_LITE); mobidb-lite (MOBIDB_LITE); mobidb-lite (MOBIDB_LITE); mobidb-lite (MOBIDB_LITE); PTHR21576 (PANTHER); PTHR21576:SF2 (PANTHER); IPR016024 (SUPERFAMILY)	no GO terms	no GO terms
genemark-Pseudochromosome_1-processed-gene-1.40	related to multidrug resistance protein	1451	0.0	C:GO:0005575; F:GO:0016887; F:GO:0022857; F:GO:0043167	C:cellular_component; F:ATPase activity; F:transmembrane transporter activity; F:ion binding	EC:3.6.1.3; EC:3.6.1.15	Adenosinetriphosphatase; Nucleoside-triphosphate phosphatase	IPR003593 (SMART); IPR036640 (G3DSA:1.20.1560.GENE3D); G3DSA:3.40.50.300 (GENE3D); IPR036640 (G3DSA:1.20.1560.GENE3D); IPR003439 (PFAM); IPR011527 (PFAM); IPR003439 (PFAM); G3DSA:3.40.50.300 (GENE3D); mobidb-lite (MOBIDB_LITE); mobidb-lite (MOBIDB_LITE); PTHR24223:SF328 (PANTHER); PTHR24223 (PANTHER); CYTOPLASMIC_DOMAIN (PHOBIUS); CYTOPLASMIC_DOMAIN (PHOBIUS); CYTOPLASMIC_DOMAIN (PHOBIUS); CYTOPL…	F:GO:0005524; C:GO:0016021; F:GO:0016887; F:GO:0042626; P:GO:0055085	F:ATP binding; C:integral component of membrane; F:ATPase activity; F:ATPase-coupled transmembrane transporter activity; P:transmembrane transport
genemark-Pseudochromosome_1-processed-gene-1.51	hypothetical protein FVER14953_09922	210	6.9506E-116	F:GO:0043167	F:ion binding			CYTOPLASMIC_DOMAIN (PHOBIUS); TRANSMEMBRANE (PHOBIUS); NON_CYTOPLASMIC_DOMAIN (PHOBIUS)	no GO terms	no GO terms
genemark-Pseudochromosome_1-processed-gene-4.37	hypothetical protein FNYG_15158	218	2.20115E-101					IPR036770 (G3DSA:1.25.40.GENE3D); IPR020683 (PROSITE_PROFILES); IPR020683 (CDD); IPR036770 (SUPERFAMILY)	no GO terms	no GO terms
snap_masked-Pseudochromosome_1-processed-gene-8.79	hypothetical protein FVER53590_25953	202	1.1548E-33					no IPS match	no IPS match	no IPS match
snap_masked-Pseudochromosome_1-processed-gene-12.74	rhodopsin family protein	127	3.5468E-72					mobidb-lite (MOBIDB_LITE); PTHR28139 (PANTHER); NON_CYTOPLASMIC_DOMAIN (PHOBIUS); TRANSMEMBRANE (PHOBIUS); CYTOPLASMIC_DOMAIN (PHOBIUS)	no GO terms	no GO terms
genemark-Pseudochromosome_1-processed-gene-16.65	related to hydroxyproline-rich glycoprotein precursor	422	0.0					mobidb-lite (MOBIDB_LITE); mobidb-lite (MOBIDB_LITE); mobidb-lite (MOBIDB_LITE); mobidb-lite (MOBIDB_LITE); mobidb-lite (MOBIDB_LITE); mobidb-lite (MOBIDB_LITE); mobidb-lite (MOBIDB_LITE); mobidb-lite (MOBIDB_LITE); PTHR23189 (PANTHER); PTHR23189:SF70 (PANTHER); PTHR23189:SF70 (PANTHER); PTHR23189 (PANTHER)	no GO terms	no GO terms
genemark-Pseudochromosome_1-processed-gene-4.26	related to transcription factor, SIN3 binding	879	0.0	F:GO:0003677; F:GO:0003700; C:GO:0005634; P:GO:0009058; P:GO:0034641; F:GO:0043167	F:DNA binding; F:DNA-binding transcription factor activity; C:nucleus; P:biosynthetic process; P:cellular nitrogen compound metabolic process; F:ion binding			IPR007219 (SMART); IPR036864 (G3DSA:4.10.240.GENE3D); IPR007219 (PFAM); mobidb-lite (MOBIDB_LITE); mobidb-lite (MOBIDB_LITE); mobidb-lite (MOBIDB_LITE); mobidb-lite (MOBIDB_LITE); PTHR31944 (PANTHER); PTHR31944:SF126 (PANTHER); NON_CYTOPLASMIC_DOMAIN (PHOBIUS); CYTOPLASMIC_DOMAIN (PHOBIUS); TRANSMEMBRANE (PHOBIUS); TRANSMEMBRANE (PHOBIUS); CYTOPLASMIC_DOMAIN (PHOBIUS); TRANSMEMBRANE (PHOBIUS); NO…	F:GO:0000981; F:GO:0003677; C:GO:0005634; P:GO:0006351; P:GO:0006355; F:GO:0008270	F:DNA-binding transcription factor activity, RNA polymerase II-specific; F:DNA binding; C:nucleus; P:transcription, DNA-templated; P:regulation of transcription, DNA-templated; F:zinc ion binding
genemark-Pseudochromosome_1-processed-gene-11.90	dolichyl-phosphate-mannose-protein mannosyltransferase	740	0.0	C:GO:0005737; C:GO:0005783; P:GO:0006464; P:GO:0009058; F:GO:0016757	C:cytoplasm; C:endoplasmic reticulum; P:cellular protein modification process; P:biosynthetic process; F:transferase activity, transferring glycosyl groups	EC:2.4.1.109	Dolichyl-phosphate-mannose--protein mannosyltransferase	IPR016093 (SMART); IPR003342 (PFAM); G3DSA:2.80.10.50 (GENE3D); IPR016093 (PFAM); IPR032421 (PFAM); IPR027005 (PANTHER); PTHR10050:SF46 (PANTHER); CYTOPLASMIC_DOMAIN (PHOBIUS); NON_CYTOPLASMIC_DOMAIN (PHOBIUS); CYTOPLASMIC_DOMAIN (PHOBIUS); CYTOPLASMIC_DOMAIN (PHOBIUS); TRANSMEMBRANE (PHOBIUS); TRANSMEMBRANE (PHOBIUS); NON_CYTOPLASMIC_DOMAIN (PHOBIUS); TRANSMEMBRANE (PHOBIUS); NON_CYTOPLASMIC_DOM…	F:GO:0000030; P:GO:0006493; C:GO:0016020	F:mannosyltransferase activity; P:protein O-linked glycosylation; C:membrane
genemark-Pseudochromosome_1-processed-gene-9.17	Translation initiation factor eIF-2B subunit gamma	550	0.0	F:GO:0008135	F:translation factor activity, RNA binding			Coil (COILS); Coil (COILS); G3DSA:2.160.10.10 (GENE3D); mobidb-lite (MOBIDB_LITE); mobidb-lite (MOBIDB_LITE); mobidb-lite (MOBIDB_LITE); PTHR22572 (PANTHER); PTHR22572:SF93 (PANTHER); NON_CYTOPLASMIC_DOMAIN (PHOBIUS); SIGNAL_PEPTIDE (PHOBIUS); SIGNAL_PEPTIDE_H_REGION (PHOBIUS); SIGNAL_PEPTIDE_N_REGION (PHOBIUS); SIGNAL_PEPTIDE_C_REGION (PHOBIUS); cd04652 (CDD); IPR029044 (SUPERFAMILY)	no GO terms	no GO terms
genemark-Pseudochromosome_1-processed-gene-10.14	Acetylornithine aminotransferase, mitochondrial	446	0.0	P:GO:0006520; F:GO:0043167	P:cellular amino acid metabolic process; F:ion binding			IPR015422 (G3DSA:3.90.1150.GENE3D); IPR005814 (PIRSF); IPR005814 (PFAM); IPR004636 (TIGRFAM); IPR015421 (G3DSA:3.40.640.GENE3D); PTHR11986 (PANTHER); PTHR11986:SF79 (PANTHER); SIGNAL_PEPTIDE_H_REGION (PHOBIUS); SIGNAL_PEPTIDE_C_REGION (PHOBIUS); SIGNAL_PEPTIDE (PHOBIUS); NON_CYTOPLASMIC_DOMAIN (PHOBIUS); SIGNAL_PEPTIDE_N_REGION (PHOBIUS); IPR004636 (HAMAP); IPR005814 (CDD); SignalP-TM (SIGNALP_GR…	F:GO:0003824; P:GO:0006525; F:GO:0008483; F:GO:0030170	F:catalytic activity; P:arginine metabolic process; F:transaminase activity; F:pyridoxal phosphate binding
augustus_masked-Pseudochromosome_1-processed-gene-6.28	nitrilase	397	0.0	P:GO:0008150	P:biological_process			IPR036526 (G3DSA:3.60.110.GENE3D); IPR003010 (PFAM); PTHR23088 (PANTHER); PTHR23088:SF5 (PANTHER); IPR003010 (PROSITE_PROFILES); cd07564 (CDD); IPR036526 (SUPERFAMILY)	P:GO:0006807	P:nitrogen compound metabolic process
snap_masked-Pseudochromosome_1-processed-gene-2.54	hypothetical protein FVEG_09890	621	0.0	C:GO:0005575	C:cellular_component			mobidb-lite (MOBIDB_LITE); PTHR35041 (PANTHER); PTHR35041:SF3 (PANTHER); TRANSMEMBRANE (PHOBIUS); NON_CYTOPLASMIC_DOMAIN (PHOBIUS); TRANSMEMBRANE (PHOBIUS); CYTOPLASMIC_DOMAIN (PHOBIUS); TRANSMEMBRANE (PHOBIUS); NON_CYTOPLASMIC_DOMAIN (PHOBIUS); CYTOPLASMIC_DOMAIN (PHOBIUS); NON_CYTOPLASMIC_DOMAIN (PHOBIUS); TRANSMEMBRANE (PHOBIUS); TMhelix (TMHMM); TMhelix (TMHMM); TMhelix (TMHMM); TMhelix (TMHM…	no GO terms	no GO terms
genemark-Pseudochromosome_1-processed-gene-9.28	related to RNA-directed RNA polymerase (RdRP)	1269	0.0	F:GO:0003723; P:GO:0009058; F:GO:0016779; P:GO:0034641	F:RNA binding; P:biosynthetic process; F:nucleotidyltransferase activity; P:cellular nitrogen compound metabolic process	EC:2.7.7.48	RNA-directed RNA polymerase	IPR007855 (PFAM); IPR007855 (PANTHER); PTHR23079:SF17 (PANTHER)	F:GO:0003968	F:RNA-directed 5'-3' RNA polymerase activity
genemark-Pseudochromosome_1-processed-gene-2.96	hypothetical protein FVER53263_21128	324	0.0					mobidb-lite (MOBIDB_LITE); mobidb-lite (MOBIDB_LITE); mobidb-lite (MOBIDB_LITE)	no GO terms	no GO terms
genemark-Pseudochromosome_1-processed-gene-11.85	related to CUE domain protein	415	0.0	F:GO:0003674	F:molecular_function			IPR003892 (SMART); G3DSA:1.10.8.10 (GENE3D); IPR003892 (PFAM); mobidb-lite (MOBIDB_LITE); mobidb-lite (MOBIDB_LITE); mobidb-lite (MOBIDB_LITE); mobidb-lite (MOBIDB_LITE); mobidb-lite (MOBIDB_LITE); mobidb-lite (MOBIDB_LITE); mobidb-lite (MOBIDB_LITE); mobidb-lite (MOBIDB_LITE); mobidb-lite (MOBIDB_LITE); PTHR16461 (PANTHER); IPR003892 (PROSITE_PROFILES); cd14372 (CDD); IPR009060 (SUPERFAMILY)	F:GO:0005515	F:protein binding
genemark-Pseudochromosome_1-processed-gene-5.15	uncharacterized protein FPRO_00206	1165	0.0					Coil (COILS); mobidb-lite (MOBIDB_LITE); mobidb-lite (MOBIDB_LITE); mobidb-lite (MOBIDB_LITE); mobidb-lite (MOBIDB_LITE); mobidb-lite (MOBIDB_LITE); mobidb-lite (MOBIDB_LITE); mobidb-lite (MOBIDB_LITE); mobidb-lite (MOBIDB_LITE); mobidb-lite (MOBIDB_LITE); mobidb-lite (MOBIDB_LITE); PTHR42081 (PANTHER)	no GO terms	no GO terms
snap_masked-Pseudochromosome_1-processed-gene-14.31	serine/threonine protein kinase	601	0.0	P:GO:0006464; F:GO:0016301; F:GO:0043167	P:cellular protein modification process; F:kinase activity; F:ion binding	EC:2.7.11	Transferring phosphorus-containing groups	mobidb-lite (MOBIDB_LITE); PTHR43289 (PANTHER); IPR000719 (PROSITE_PROFILES); IPR011009 (SUPERFAMILY)	F:GO:0004672; F:GO:0005524; P:GO:0006468	F:protein kinase activity; F:ATP binding; P:protein phosphorylation
maker-Pseudochromosome_1-snap-gene-15.5	long-chain acyl-CoA synthetase	704	0.0	F:GO:0016874	F:ligase activity			IPR000873 (PFAM); G3DSA:3.40.50.12780 (GENE3D); G3DSA:3.40.50.12780 (GENE3D); PTHR43272:SF17 (PANTHER); PTHR43272 (PANTHER); SSF56801 (SUPERFAMILY)	F:GO:0003824	F:catalytic activity
genemark-Pseudochromosome_1-processed-gene-13.20	ATP-dependent metalloprotease	825	0.0	C:GO:0005575; F:GO:0008233; F:GO:0043167	C:cellular_component; F:peptidase activity; F:ion binding	EC:3.4.24	Acting on peptide bonds (peptidases)	IPR003593 (SMART); PF17862 (PFAM); G3DSA:3.40.50.300 (GENE3D); G3DSA:1.10.8.60 (GENE3D); IPR000642 (PFAM); G3DSA:1.20.58.760 (GENE3D); IPR005936 (TIGRFAM); IPR003959 (PFAM); mobidb-lite (MOBIDB_LITE); mobidb-lite (MOBIDB_LITE); PTHR23076 (PANTHER); CYTOPLASMIC_DOMAIN (PHOBIUS); NON_CYTOPLASMIC_DOMAIN (PHOBIUS); TRANSMEMBRANE (PHOBIUS); IPR005936 (HAMAP); cd00009 (CDD); IPR037219 (SUPERFAMILY); IP…	F:GO:0004222; F:GO:0005524; P:GO:0006508; C:GO:0016020	F:metalloendopeptidase activity; F:ATP binding; P:proteolysis; C:membrane
maker-Pseudochromosome_1-snap-gene-9.85	hypothetical protein FVEG_16635	243	1.44236E-18	C:GO:0005575	C:cellular_component			no IPS match	no IPS match	no IPS match
genemark-Pseudochromosome_1-processed-gene-5.31	hypothetical protein FNYG_08802	475	0.0					no IPS match	no IPS match	no IPS match
genemark-Pseudochromosome_1-processed-gene-7.21	hypothetical protein FOXB_15424	1400	0.0					Coil (COILS); mobidb-lite (MOBIDB_LITE); mobidb-lite (MOBIDB_LITE); mobidb-lite (MOBIDB_LITE); mobidb-lite (MOBIDB_LITE); mobidb-lite (MOBIDB_LITE); mobidb-lite (MOBIDB_LITE); mobidb-lite (MOBIDB_LITE); mobidb-lite (MOBIDB_LITE); mobidb-lite (MOBIDB_LITE); mobidb-lite (MOBIDB_LITE); mobidb-lite (MOBIDB_LITE); mobidb-lite (MOBIDB_LITE); mobidb-lite (MOBIDB_LITE); mobidb-lite (MOBIDB_LITE); mobidb-…	no GO terms	no GO terms
snap_masked-Pseudochromosome_1-processed-gene-1.65	related to feruloyl esterase B precursor	526	0.0	F:GO:0003674	F:molecular_function			IPR011118 (PFAM); PTHR33938:SF13 (PANTHER); IPR011118 (PANTHER); IPR029058 (SUPERFAMILY)	no GO terms	no GO terms
snap_masked-Pseudochromosome_1-processed-gene-10.40	-No description-	72						mobidb-lite (MOBIDB_LITE); mobidb-lite (MOBIDB_LITE)	no GO terms	no GO terms
snap_masked-Pseudochromosome_1-processed-gene-1.98	transferase family protein	381	1.33813E-145	F:GO:0016740	F:transferase activity			IPR007817 (PFAM); PTHR37285:SF2 (PANTHER); IPR007817 (PANTHER)	no GO terms	no GO terms
snap_masked-Pseudochromosome_1-processed-gene-2.27	duf300 domain-containing protein	304	0.0	F:GO:0003674; C:GO:0005575	F:molecular_function; C:cellular_component			IPR005178 (PFAM); IPR005178 (PANTHER); PTHR23423:SF34 (PANTHER); CYTOPLASMIC_DOMAIN (PHOBIUS); TRANSMEMBRANE (PHOBIUS); NON_CYTOPLASMIC_DOMAIN (PHOBIUS); CYTOPLASMIC_DOMAIN (PHOBIUS); CYTOPLASMIC_DOMAIN (PHOBIUS); TRANSMEMBRANE (PHOBIUS); NON_CYTOPLASMIC_DOMAIN (PHOBIUS); TRANSMEMBRANE (PHOBIUS); TRANSMEMBRANE (PHOBIUS); TRANSMEMBRANE (PHOBIUS); NON_CYTOPLASMIC_DOMAIN (PHOBIUS); TMhelix (TMHMM); …	no GO terms	no GO terms
snap_masked-Pseudochromosome_1-processed-gene-1.87	hypothetical protein FVEG_09942	82	1.1226E-43	C:GO:0005575	C:cellular_component			NON_CYTOPLASMIC_DOMAIN (PHOBIUS); CYTOPLASMIC_DOMAIN (PHOBIUS); NON_CYTOPLASMIC_DOMAIN (PHOBIUS); TRANSMEMBRANE (PHOBIUS); TRANSMEMBRANE (PHOBIUS); SignalP-TM (SIGNALP_GRAM_POSITIVE); TMhelix (TMHMM); TMhelix (TMHMM)	no GO terms	no GO terms
snap_masked-Pseudochromosome_1-processed-gene-3.62	diaminopimelate epimerase	269	1.58948E-167	C:GO:0005737; P:GO:0006520; P:GO:0009058; F:GO:0016853	C:cytoplasm; P:cellular amino acid metabolic process; P:biosynthetic process; F:isomerase activity	EC:5.1.1.7; EC:5.1.1.10	Diaminopimelate epimerase; Amino-acid racemase	IPR001653 (PFAM); IPR001653 (TIGRFAM); G3DSA:3.10.310.10 (GENE3D); G3DSA:3.10.310.10 (GENE3D); IPR001653 (PANTHER); IPR001653 (HAMAP); SSF54506 (SUPERFAMILY); SSF54506 (SUPERFAMILY)	F:GO:0008837; P:GO:0009089	F:diaminopimelate epimerase activity; P:lysine biosynthetic process via diaminopimelate
genemark-Pseudochromosome_1-processed-gene-0.19	UDP-glucosyl transferase family protein	546	0.0	C:GO:0005575; F:GO:0016757	C:cellular_component; F:transferase activity, transferring glycosyl groups			G3DSA:3.40.50.2000 (GENE3D); G3DSA:3.40.50.2000 (GENE3D); IPR002213 (PFAM); PTHR11926 (PANTHER); PTHR11926:SF476 (PANTHER); TRANSMEMBRANE (PHOBIUS); SIGNAL_PEPTIDE_C_REGION (PHOBIUS); SIGNAL_PEPTIDE_H_REGION (PHOBIUS); SIGNAL_PEPTIDE_N_REGION (PHOBIUS); CYTOPLASMIC_DOMAIN (PHOBIUS); NON_CYTOPLASMIC_DOMAIN (PHOBIUS); SIGNAL_PEPTIDE (PHOBIUS); SSF53756 (SUPERFAMILY); TMhelix (TMHMM)	F:GO:0016758	F:transferase activity, transferring hexosyl groups
snap_masked-Pseudochromosome_1-processed-gene-1.73	putative 6-phosphogluconate dehydrogenase protein	149	3.93755E-82	F:GO:0016491	F:oxidoreductase activity			IPR013328 (G3DSA:1.10.1040.GENE3D); PTHR43580 (PANTHER); PTHR43580:SF3 (PANTHER); IPR008927 (SUPERFAMILY)	F:GO:0016491; P:GO:0055114	F:oxidoreductase activity; P:oxidation-reduction process
genemark-Pseudochromosome_1-processed-gene-12.15	NAD(P)H-dependent D-xylose reductase xyl1	324	0.0	F:GO:0016491	F:oxidoreductase activity			IPR020471 (PRINTS); IPR020471 (PIRSF); IPR023210 (PFAM); IPR036812 (G3DSA:3.20.20.GENE3D); IPR020471 (PANTHER); PTHR11732:SF218 (PANTHER); IPR023210 (CDD); IPR036812 (SUPERFAMILY)	F:GO:0016491; P:GO:0055114	F:oxidoreductase activity; P:oxidation-reduction process
genemark-Pseudochromosome_1-processed-gene-3.77	hypothetical protein FVER53590_09865	210	2.89835E-148					IPR029032 (G3DSA:1.20.1290.GENE3D); PTHR34846:SF2 (PANTHER); PTHR34846 (PANTHER); IPR029032 (SUPERFAMILY)	no GO terms	no GO terms
genemark-Pseudochromosome_1-processed-gene-15.73	mitochondrial DNA replication protein YHM2	318	0.0	F:GO:0003677; C:GO:0005739; P:GO:0007005; F:GO:0022857	F:DNA binding; C:mitochondrion; P:mitochondrion organization; F:transmembrane transporter activity			IPR023395 (G3DSA:1.50.40.GENE3D); IPR023395 (G3DSA:1.50.40.GENE3D); IPR018108 (PFAM); PTHR24089:SF344 (PANTHER); IPR040062 (PANTHER); IPR018108 (PROSITE_PROFILES); IPR018108 (PROSITE_PROFILES); IPR018108 (PROSITE_PROFILES); IPR023395 (SUPERFAMILY)	F:GO:0022857	F:transmembrane transporter activity
genemark-Pseudochromosome_1-processed-gene-15.84	hypothetical protein FNYG_07602	268	2.63271E-170					Coil (COILS); Coil (COILS); mobidb-lite (MOBIDB_LITE); mobidb-lite (MOBIDB_LITE)	no GO terms	no GO terms
maker-Pseudochromosome_1-snap-gene-3.1	Major facilitator superfamily domain-containing protein 5	481	0.0	C:GO:0005575; F:GO:0022857	C:cellular_component; F:transmembrane transporter activity			G3DSA:1.20.1250.20 (GENE3D); IPR008509 (PFAM); IPR008509 (PANTHER); TRANSMEMBRANE (PHOBIUS); NON_CYTOPLASMIC_DOMAIN (PHOBIUS); TRANSMEMBRANE (PHOBIUS); CYTOPLASMIC_DOMAIN (PHOBIUS); TRANSMEMBRANE (PHOBIUS); TRANSMEMBRANE (PHOBIUS); CYTOPLASMIC_DOMAIN (PHOBIUS); NON_CYTOPLASMIC_DOMAIN (PHOBIUS); TRANSMEMBRANE (PHOBIUS); CYTOPLASMIC_DOMAIN (PHOBIUS); NON_CYTOPLASMIC_DOMAIN (PHOBIUS); NON_CYTOPLASMI…	F:GO:0015098; P:GO:0015689; C:GO:0016021	F:molybdate ion transmembrane transporter activity; P:molybdate ion transport; C:integral component of membrane
snap_masked-Pseudochromosome_1-processed-gene-4.102	uncharacterized protein LW94_15140	464	0.0					no IPS match	no IPS match	no IPS match
genemark-Pseudochromosome_1-processed-gene-12.45	Cu2+-exporting ATPase	1166	0.0	C:GO:0005575; F:GO:0016887; F:GO:0022857; F:GO:0043167	C:cellular_component; F:ATPase activity; F:transmembrane transporter activity; F:ion binding	EC:3.6.1.3; EC:3.6.1.15	Adenosinetriphosphatase; Nucleoside-triphosphate phosphatase	PR00119 (PRINTS); PR00942 (PRINTS); IPR001757 (TIGRFAM); IPR027256 (TIGRFAM); G3DSA:3.30.70.100 (GENE3D); G3DSA:3.30.70.100 (GENE3D); G3DSA:3.30.70.100 (GENE3D); IPR006121 (PFAM); IPR023299 (G3DSA:3.40.1110.GENE3D); PF00702 (PFAM); IPR006122 (TIGRFAM); G3DSA:2.70.150.20 (GENE3D); PF00122 (PFAM); IPR023214 (G3DSA:3.40.50.GENE3D); mobidb-lite (MOBIDB_LITE); PTHR43520 (PANTHER); PTHR43520:SF8 (PANTH…	F:GO:0000166; F:GO:0005507; P:GO:0006812; C:GO:0016021; F:GO:0019829; P:GO:0030001; F:GO:0046872	F:nucleotide binding; F:copper ion binding; P:cation transport; C:integral component of membrane; F:ATPase-coupled cation transmembrane transporter activity; P:metal ion transport; F:metal ion binding
snap_masked-Pseudochromosome_1-processed-gene-6.53	ankyrin repeat protein	509	1.42017E-99	F:GO:0003674	F:molecular_function			IPR002110 (PRINTS); IPR002110 (SMART); IPR036770 (G3DSA:1.25.40.GENE3D); IPR002110 (PFAM); IPR020683 (PFAM); IPR036770 (G3DSA:1.25.40.GENE3D); IPR036770 (G3DSA:1.25.40.GENE3D); PF13637 (PFAM); PTHR24126 (PANTHER); IPR002110 (PROSITE_PROFILES); IPR020683 (PROSITE_PROFILES); IPR002110 (PROSITE_PROFILES); IPR002110 (PROSITE_PROFILES); IPR002110 (PROSITE_PROFILES); IPR002110 (PROSITE_PROFILES); IPR00…	F:GO:0005515	F:protein binding
genemark-Pseudochromosome_1-processed-gene-4.41	uncharacterized protein LW93_11248	361	0.0	C:GO:0005575	C:cellular_component			NON_CYTOPLASMIC_DOMAIN (PHOBIUS); TRANSMEMBRANE (PHOBIUS); CYTOPLASMIC_DOMAIN (PHOBIUS); TMhelix (TMHMM)	no GO terms	no GO terms
genemark-Pseudochromosome_1-processed-gene-6.111	probable DIP5-glutamate and aspartate permease	577	0.0	C:GO:0005575; F:GO:0022857	C:cellular_component; F:transmembrane transporter activity			IPR004841 (PFAM); IPR002293 (PIRSF); G3DSA:1.20.1740.10 (GENE3D); PTHR43341:SF9 (PANTHER); PTHR43341 (PANTHER); TRANSMEMBRANE (PHOBIUS); TRANSMEMBRANE (PHOBIUS); TRANSMEMBRANE (PHOBIUS); TRANSMEMBRANE (PHOBIUS); CYTOPLASMIC_DOMAIN (PHOBIUS); CYTOPLASMIC_DOMAIN (PHOBIUS); TRANSMEMBRANE (PHOBIUS); NON_CYTOPLASMIC_DOMAIN (PHOBIUS); NON_CYTOPLASMIC_DOMAIN (PHOBIUS); NON_CYTOPLASMIC_DOMAIN (PHOBIUS); …	C:GO:0016020; F:GO:0022857; P:GO:0055085	C:membrane; F:transmembrane transporter activity; P:transmembrane transport
genemark-Pseudochromosome_1-processed-gene-6.100	uncharacterized protein FMAN_00221	141	2.58676E-96	C:GO:0005575	C:cellular_component			NON_CYTOPLASMIC_DOMAIN (PHOBIUS); CYTOPLASMIC_DOMAIN (PHOBIUS); TRANSMEMBRANE (PHOBIUS); NON_CYTOPLASMIC_DOMAIN (PHOBIUS); TRANSMEMBRANE (PHOBIUS); CYTOPLASMIC_DOMAIN (PHOBIUS); TRANSMEMBRANE (PHOBIUS); TMhelix (TMHMM); TMhelix (TMHMM)	no GO terms	no GO terms
snap_masked-Pseudochromosome_1-processed-gene-3.40	related to Melibiase subfamily	714	0.0	P:GO:0005975; F:GO:0016798	P:carbohydrate metabolic process; F:hydrolase activity, acting on glycosyl bonds	EC:3.2.1.22	Alpha-galactosidase	IPR002252 (PRINTS); IPR013785 (G3DSA:3.20.20.GENE3D); IPR038417 (G3DSA:2.70.98.GENE3D); IPR002252 (PFAM); IPR031704 (PFAM); PTHR22762:SF81 (PANTHER); PTHR22762 (PANTHER); IPR002252 (CDD); IPR017853 (SUPERFAMILY)	F:GO:0003824; F:GO:0004557; P:GO:0005975	F:catalytic activity; F:alpha-galactosidase activity; P:carbohydrate metabolic process
genemark-Pseudochromosome_1-processed-gene-11.101	hypothetical protein FVER53590_09623	240	1.36971E-169	C:GO:0005575	C:cellular_component			mobidb-lite (MOBIDB_LITE); CYTOPLASMIC_DOMAIN (PHOBIUS); TRANSMEMBRANE (PHOBIUS); NON_CYTOPLASMIC_DOMAIN (PHOBIUS); TRANSMEMBRANE (PHOBIUS); CYTOPLASMIC_DOMAIN (PHOBIUS); NON_CYTOPLASMIC_DOMAIN (PHOBIUS); TRANSMEMBRANE (PHOBIUS); CYTOPLASMIC_DOMAIN (PHOBIUS); TRANSMEMBRANE (PHOBIUS); TMhelix (TMHMM); TMhelix (TMHMM); TMhelix (TMHMM); TMhelix (TMHMM)	no GO terms	no GO terms
snap_masked-Pseudochromosome_1-processed-gene-6.61	hypothetical protein FOIG_00099	88	9.23822E-19					no IPS match	no IPS match	no IPS match
snap_masked-Pseudochromosome_1-processed-gene-5.66	uncharacterized protein Y057_14791	259	2.47051E-177					mobidb-lite (MOBIDB_LITE); mobidb-lite (MOBIDB_LITE)	no GO terms	no GO terms
maker-Pseudochromosome_1-snap-gene-8.92	related to dna mismatch repair homologue (hpms2)	894	0.0	P:GO:0000003; C:GO:0005622; P:GO:0006259; P:GO:0006950; P:GO:0007049; F:GO:0016887; C:GO:0032991; F:GO:0043167	P:reproduction; C:intracellular; P:DNA metabolic process; P:response to stress; P:cell cycle; F:ATPase activity; C:protein-containing complex; F:ion binding	EC:3.6.1.3; EC:3.6.1.15	Adenosinetriphosphatase; Nucleoside-triphosphate phosphatase	IPR014790 (SMART); G3DSA:3.30.1370.100 (GENE3D); G3DSA:2.30.42.20 (GENE3D); IPR014790 (PFAM); PF13589 (PFAM); IPR036890 (G3DSA:3.30.565.GENE3D); mobidb-lite (MOBIDB_LITE); mobidb-lite (MOBIDB_LITE); mobidb-lite (MOBIDB_LITE); mobidb-lite (MOBIDB_LITE); mobidb-lite (MOBIDB_LITE); IPR028830 (PTHR10073:PANTHER); IPR038973 (PANTHER); NON_CYTOPLASMIC_DOMAIN (PHOBIUS); TRANSMEMBRANE (PHOBIUS); CYTOPLAS…	F:GO:0005524; P:GO:0006298; P:GO:0007131; F:GO:0016887; C:GO:0032300	F:ATP binding; P:mismatch repair; P:reciprocal meiotic recombination; F:ATPase activity; C:mismatch repair complex
snap_masked-Pseudochromosome_1-processed-gene-15.65	-No description-	61						mobidb-lite (MOBIDB_LITE)	no GO terms	no GO terms
snap_masked-Pseudochromosome_1-processed-gene-5.77	uncharacterized protein FVRRES_02023	612	4.69382E-156	C:GO:0005575	C:cellular_component			CYTOPLASMIC_DOMAIN (PHOBIUS); TRANSMEMBRANE (PHOBIUS); TRANSMEMBRANE (PHOBIUS); NON_CYTOPLASMIC_DOMAIN (PHOBIUS); NON_CYTOPLASMIC_DOMAIN (PHOBIUS); TRANSMEMBRANE (PHOBIUS); CYTOPLASMIC_DOMAIN (PHOBIUS); TMhelix (TMHMM)	no GO terms	no GO terms
genemark-Pseudochromosome_1-processed-gene-0.27	uncharacterized protein FRV6_04876	729	0.0	C:GO:0005575; P:GO:0055085	C:cellular_component; P:transmembrane transport			IPR025340 (PFAM); IPR025340 (PANTHER)	no GO terms	no GO terms
genemark-Pseudochromosome_1-processed-gene-14.19	DNA-directed RNA polymerase II subunit RPB3	340	0.0	F:GO:0003677; P:GO:0009058; F:GO:0016779; P:GO:0034641	F:DNA binding; P:biosynthetic process; F:nucleotidyltransferase activity; P:cellular nitrogen compound metabolic process	EC:2.7.7.6	DNA-directed RNA polymerase	IPR011263 (SMART); IPR036603 (G3DSA:3.30.1360.GENE3D); IPR011263 (PFAM); IPR036643 (G3DSA:2.170.120.GENE3D); IPR011262 (PFAM); mobidb-lite (MOBIDB_LITE); PTHR11800:SF2 (PANTHER); PTHR11800 (PANTHER); cd07031 (CDD); IPR036643 (SUPERFAMILY); IPR036603 (SUPERFAMILY)	F:GO:0003899; P:GO:0006351; F:GO:0046983	F:DNA-directed 5'-3' RNA polymerase activity; P:transcription, DNA-templated; F:protein dimerization activity
genemark-Pseudochromosome_1-processed-gene-9.10	uncharacterized protein FFB14_11737	448	0.0					mobidb-lite (MOBIDB_LITE); mobidb-lite (MOBIDB_LITE); mobidb-lite (MOBIDB_LITE); mobidb-lite (MOBIDB_LITE)	no GO terms	no GO terms
maker-Pseudochromosome_1-augustus-gene-8.96	uncharacterized protein LW93_11385	403	0.0					mobidb-lite (MOBIDB_LITE); mobidb-lite (MOBIDB_LITE); mobidb-lite (MOBIDB_LITE); mobidb-lite (MOBIDB_LITE); mobidb-lite (MOBIDB_LITE); mobidb-lite (MOBIDB_LITE); mobidb-lite (MOBIDB_LITE)	no GO terms	no GO terms
genemark-Pseudochromosome_1-processed-gene-1.58	uncharacterized protein FPRN_00032	525	0.0	C:GO:0005575; P:GO:0055085	C:cellular_component; P:transmembrane transport			IPR011701 (PFAM); PTHR23507 (PANTHER); PTHR23507:SF25 (PANTHER); TRANSMEMBRANE (PHOBIUS); CYTOPLASMIC_DOMAIN (PHOBIUS); TRANSMEMBRANE (PHOBIUS); TRANSMEMBRANE (PHOBIUS); CYTOPLASMIC_DOMAIN (PHOBIUS); NON_CYTOPLASMIC_DOMAIN (PHOBIUS); NON_CYTOPLASMIC_DOMAIN (PHOBIUS); TRANSMEMBRANE (PHOBIUS); TRANSMEMBRANE (PHOBIUS); TRANSMEMBRANE (PHOBIUS); TRANSMEMBRANE (PHOBIUS); TRANSMEMBRANE (PHOBIUS); NON_CY…	C:GO:0016021; P:GO:0055085	C:integral component of membrane; P:transmembrane transport
genemark-Pseudochromosome_1-processed-gene-1.36	NAD(P)-binding protein	292	0.0	F:GO:0016491	F:oxidoreductase activity			IPR002347 (PRINTS); IPR002347 (PRINTS); G3DSA:3.40.50.720 (GENE3D); PF13561 (PFAM); PTHR43008 (PANTHER); PTHR43008:SF5 (PANTHER); IPR036291 (SUPERFAMILY)	no GO terms	no GO terms
snap_masked-Pseudochromosome_1-processed-gene-7.38	Septation initiation network scaffold protein cdc11	1831	0.0	F:GO:0003674	F:molecular_function			Coil (COILS); SM00364 (SMART); SM00365 (SMART); IPR003591 (SMART); IPR032675 (G3DSA:3.80.10.GENE3D); mobidb-lite (MOBIDB_LITE); mobidb-lite (MOBIDB_LITE); mobidb-lite (MOBIDB_LITE); mobidb-lite (MOBIDB_LITE); mobidb-lite (MOBIDB_LITE); mobidb-lite (MOBIDB_LITE); mobidb-lite (MOBIDB_LITE); mobidb-lite (MOBIDB_LITE); mobidb-lite (MOBIDB_LITE); mobidb-lite (MOBIDB_LITE); mobidb-lite (MOBIDB_LITE); m…	F:GO:0005515	F:protein binding
genemark-Pseudochromosome_1-processed-gene-13.4	hypothetical protein FNYG_07532	1414	0.0					Coil (COILS); mobidb-lite (MOBIDB_LITE); mobidb-lite (MOBIDB_LITE); mobidb-lite (MOBIDB_LITE); mobidb-lite (MOBIDB_LITE); mobidb-lite (MOBIDB_LITE); mobidb-lite (MOBIDB_LITE); mobidb-lite (MOBIDB_LITE); mobidb-lite (MOBIDB_LITE); mobidb-lite (MOBIDB_LITE); mobidb-lite (MOBIDB_LITE); mobidb-lite (MOBIDB_LITE); mobidb-lite (MOBIDB_LITE); mobidb-lite (MOBIDB_LITE)	no GO terms	no GO terms
genemark-Pseudochromosome_1-processed-gene-1.44	p-loop containing nucleoside triphosphate hydrolase	987	0.0	C:GO:0005623; P:GO:0022607	C:cell; P:cellular component assembly			G3DSA:3.40.50.300 (GENE3D); IPR037344 (PANTHER); PTHR10039:SF5 (PANTHER); IPR027417 (SUPERFAMILY)	C:GO:0032126; P:GO:0070941	C:eisosome; P:eisosome assembly
maker-Pseudochromosome_1-augustus-gene-6.3	hypothetical protein FVEG_09778	200	8.46199E-144					PTHR38049:SF1 (PANTHER); PTHR38049 (PANTHER); SIGNAL_PEPTIDE (PHOBIUS); NON_CYTOPLASMIC_DOMAIN (PHOBIUS); SIGNAL_PEPTIDE_C_REGION (PHOBIUS); SIGNAL_PEPTIDE_N_REGION (PHOBIUS); SIGNAL_PEPTIDE_H_REGION (PHOBIUS); SignalP-noTM (SIGNALP_EUK); SignalP-TM (SIGNALP_GRAM_POSITIVE)	no GO terms	no GO terms
snap_masked-Pseudochromosome_1-processed-gene-3.70	related to salicylate 1-monooxygenase (flavoprotein monooxygenase)	416	0.0	F:GO:0016491; F:GO:0043167	F:oxidoreductase activity; F:ion binding			PR00420 (PRINTS); IPR036188 (G3DSA:3.50.50.GENE3D); IPR002938 (PFAM); PTHR13789 (PANTHER); PTHR13789:SF169 (PANTHER); NON_CYTOPLASMIC_DOMAIN (PHOBIUS); SIGNAL_PEPTIDE_N_REGION (PHOBIUS); SIGNAL_PEPTIDE_H_REGION (PHOBIUS); SIGNAL_PEPTIDE (PHOBIUS); SIGNAL_PEPTIDE_C_REGION (PHOBIUS); IPR036188 (SUPERFAMILY)	F:GO:0071949	F:FAD binding
genemark-Pseudochromosome_1-processed-gene-9.30	related to positive cofactor 2	1003	0.0	F:GO:0003674; C:GO:0005654; P:GO:0009058; C:GO:0032991; P:GO:0034641	F:molecular_function; C:nucleoplasm; P:biosynthetic process; C:protein-containing complex; P:cellular nitrogen compound metabolic process			Coil (COILS); Coil (COILS); IPR021950 (PFAM); mobidb-lite (MOBIDB_LITE); mobidb-lite (MOBIDB_LITE); mobidb-lite (MOBIDB_LITE); mobidb-lite (MOBIDB_LITE); mobidb-lite (MOBIDB_LITE); mobidb-lite (MOBIDB_LITE); mobidb-lite (MOBIDB_LITE); mobidb-lite (MOBIDB_LITE); mobidb-lite (MOBIDB_LITE); mobidb-lite (MOBIDB_LITE); mobidb-lite (MOBIDB_LITE); mobidb-lite (MOBIDB_LITE); mobidb-lite (MOBIDB_LITE); mo…	C:GO:0000124; F:GO:0003712	C:SAGA complex; F:transcription coregulator activity
genemark-Pseudochromosome_1-processed-gene-14.1	hypothetical protein FOC4_g10007171	151	3.86534E-101	C:GO:0005575	C:cellular_component			SIGNAL_PEPTIDE_N_REGION (PHOBIUS); SIGNAL_PEPTIDE_H_REGION (PHOBIUS); SIGNAL_PEPTIDE_C_REGION (PHOBIUS); TRANSMEMBRANE (PHOBIUS); NON_CYTOPLASMIC_DOMAIN (PHOBIUS); CYTOPLASMIC_DOMAIN (PHOBIUS); SIGNAL_PEPTIDE (PHOBIUS); PS51257 (PROSITE_PROFILES); SignalP-TM (SIGNALP_GRAM_POSITIVE); SignalP-noTM (SIGNALP_GRAM_NEGATIVE); SignalP-noTM (SIGNALP_EUK); TMhelix (TMHMM); TMhelix (TMHMM)	no GO terms	no GO terms
genemark-Pseudochromosome_1-processed-gene-12.23	probable sugar transporter	548	0.0	C:GO:0005575; F:GO:0022857	C:cellular_component; F:transmembrane transporter activity			IPR003663 (PRINTS); IPR003663 (TIGRFAM); IPR005828 (PFAM); G3DSA:1.20.1250.20 (GENE3D); mobidb-lite (MOBIDB_LITE); mobidb-lite (MOBIDB_LITE); PTHR23500:SF9 (PANTHER); PTHR23500 (PANTHER); CYTOPLASMIC_DOMAIN (PHOBIUS); TRANSMEMBRANE (PHOBIUS); NON_CYTOPLASMIC_DOMAIN (PHOBIUS); TRANSMEMBRANE (PHOBIUS); CYTOPLASMIC_DOMAIN (PHOBIUS); TRANSMEMBRANE (PHOBIUS); TRANSMEMBRANE (PHOBIUS); TRANSMEMBRANE (PH…	C:GO:0016020; C:GO:0016021; F:GO:0022857; P:GO:0055085	C:membrane; C:integral component of membrane; F:transmembrane transporter activity; P:transmembrane transport
genemark-Pseudochromosome_1-processed-gene-14.12	Histone H2A.Z-specific chaperone chz1	114	5.1015E-61					IPR019098 (SMART); IPR019098 (PFAM); mobidb-lite (MOBIDB_LITE); mobidb-lite (MOBIDB_LITE); mobidb-lite (MOBIDB_LITE)	no GO terms	no GO terms
snap_masked-Pseudochromosome_1-processed-gene-5.69	uncharacterized protein FMAN_00190	179	8.1449E-76					no IPS match	no IPS match	no IPS match
snap_masked-Pseudochromosome_1-processed-gene-5.58	hypothetical protein FNYG_15165	180	3.71648E-116					no IPS match	no IPS match	no IPS match
genemark-Pseudochromosome_1-processed-gene-10.10	related to zinc finger protein odd-paired-like (opl)	365	0.0	F:GO:0003674	F:molecular_function			IPR013087 (SMART); G3DSA:3.30.160.60 (GENE3D); G3DSA:3.30.160.60 (GENE3D); IPR013087 (PFAM); mobidb-lite (MOBIDB_LITE); mobidb-lite (MOBIDB_LITE); PTHR14596 (PANTHER); PTHR14596:SF60 (PANTHER); IPR013087 (PROSITE_PROFILES); IPR036236 (SUPERFAMILY)	F:GO:0003676	F:nucleic acid binding
genemark-Pseudochromosome_1-processed-gene-10.21	related to hormone-sensitive lipase	739	0.0	F:GO:0003674	F:molecular_function			IPR029058 (G3DSA:3.40.50.GENE3D); IPR029058 (G3DSA:3.40.50.GENE3D); IPR013094 (PFAM); mobidb-lite (MOBIDB_LITE); mobidb-lite (MOBIDB_LITE); mobidb-lite (MOBIDB_LITE); mobidb-lite (MOBIDB_LITE); mobidb-lite (MOBIDB_LITE); PTHR23025:SF3 (PANTHER); PTHR23025 (PANTHER); NON_CYTOPLASMIC_DOMAIN (PHOBIUS); TRANSMEMBRANE (PHOBIUS); NON_CYTOPLASMIC_DOMAIN (PHOBIUS); TRANSMEMBRANE (PHOBIUS); CYTOPLASMIC_DO…	F:GO:0016787	F:hydrolase activity
snap_masked-Pseudochromosome_1-processed-gene-2.58	related to dehydroshikimate dehydratase	342	0.0	F:GO:0016491; F:GO:0016829	F:oxidoreductase activity; F:lyase activity	EC:1.1.1.25; EC:4.2.1.10; EC:1.1.1.282	Shikimate dehydrogenase; 3-dehydroquinate dehydratase; Quinate/shikimate dehydrogenase	G3DSA:3.20.20.150 (GENE3D); IPR013022 (PFAM); PTHR12110 (PANTHER); PTHR12110:SF38 (PANTHER); IPR036237 (SUPERFAMILY)	no GO terms	no GO terms
genemark-Pseudochromosome_1-processed-gene-5.6	hypothetical protein FNYG_15170	595	0.0	F:GO:0003674	F:molecular_function			IPR001810 (PFAM); mobidb-lite (MOBIDB_LITE); mobidb-lite (MOBIDB_LITE); IPR036047 (SUPERFAMILY)	F:GO:0005515	F:protein binding
snap_masked-Pseudochromosome_1-processed-gene-14.56	uncharacterized protein LW93_11577	477	0.0					mobidb-lite (MOBIDB_LITE); mobidb-lite (MOBIDB_LITE); mobidb-lite (MOBIDB_LITE); mobidb-lite (MOBIDB_LITE); mobidb-lite (MOBIDB_LITE); mobidb-lite (MOBIDB_LITE); mobidb-lite (MOBIDB_LITE); mobidb-lite (MOBIDB_LITE)	no GO terms	no GO terms
snap_masked-Pseudochromosome_1-processed-gene-3.47	serine/threonine protein kinase	441	0.0	F:GO:0008233; F:GO:0016301	F:peptidase activity; F:kinase activity	EC:3.4.21	Acting on peptide bonds (peptidases)	IPR015500 (PRINTS); IPR000209 (PFAM); IPR036852 (G3DSA:3.40.50.GENE3D); PTHR43806 (PANTHER); cd00306 (CDD); IPR036852 (SUPERFAMILY)	F:GO:0004252; P:GO:0006508	F:serine-type endopeptidase activity; P:proteolysis
genemark-Pseudochromosome_1-processed-gene-14.23	uncharacterized protein FFUJ_01648	99	2.22668E-47					no IPS match	no IPS match	no IPS match
augustus_masked-Pseudochromosome_1-processed-gene-7.71	lipoate-protein ligase A	399	0.0	P:GO:0006464; F:GO:0016874; P:GO:0051604	P:cellular protein modification process; F:ligase activity; P:protein maturation			G3DSA:3.30.930.10 (GENE3D); IPR004143 (PFAM); PTHR12561:SF3 (PANTHER); IPR004562 (PANTHER); IPR004143 (PROSITE_PROFILES); cd16443 (CDD); SSF55681 (SUPERFAMILY)	P:GO:0006464; P:GO:0009249	P:cellular protein modification process; P:protein lipoylation
genemark-Pseudochromosome_1-processed-gene-12.34	hypothetical protein FPRO05_04570	743	0.0	C:GO:0005634	C:nucleus			IPR000953 (SMART); IPR019318 (PFAM); IPR023780 (PFAM); G3DSA:2.40.50.40 (GENE3D); mobidb-lite (MOBIDB_LITE); mobidb-lite (MOBIDB_LITE); mobidb-lite (MOBIDB_LITE); mobidb-lite (MOBIDB_LITE); mobidb-lite (MOBIDB_LITE); PTHR12425:SF5 (PANTHER); IPR019318 (PANTHER); IPR000953 (PROSITE_PROFILES); IPR000953 (CDD); IPR016197 (SUPERFAMILY); IPR016024 (SUPERFAMILY)	no GO terms	no GO terms
maker-Pseudochromosome_1-augustus-gene-1.14	uncharacterized protein FPRO_00048	370	0.0	F:GO:0003700; P:GO:0009058; P:GO:0034641	F:DNA-binding transcription factor activity; P:biosynthetic process; P:cellular nitrogen compound metabolic process			Coil (COILS); G3DSA:1.20.5.170 (GENE3D); mobidb-lite (MOBIDB_LITE); mobidb-lite (MOBIDB_LITE); PTHR39607 (PANTHER); cd14688 (CDD); SSF57959 (SUPERFAMILY)	no GO terms	no GO terms
genemark-Pseudochromosome_1-processed-gene-11.82	probable VPS29-involved in vacuolar protein sorting	241	7.18239E-135	C:GO:0005829; P:GO:0016192; C:GO:0032991	C:cytosol; P:vesicle-mediated transport; C:protein-containing complex			IPR024654 (PFAM); IPR029052 (G3DSA:3.60.21.GENE3D); IPR000979 (TIGRFAM); IPR028661 (PTHR11124:PANTHER); IPR000979 (PANTHER); IPR028661 (CDD); SSF56300 (SUPERFAMILY)	C:GO:0030904; P:GO:0042147	C:retromer complex; P:retrograde transport, endosome to Golgi
snap_masked-Pseudochromosome_1-processed-gene-13.82	uncharacterized protein FPRN_00435	221	8.35613E-159					Coil (COILS); Coil (COILS); Coil (COILS)	no GO terms	no GO terms
snap_masked-Pseudochromosome_1-processed-gene-5.64	uncharacterized protein LW93_11292	190	5.56017E-100					no IPS match	no IPS match	no IPS match
genemark-Pseudochromosome_1-processed-gene-9.3	probable flavin-containing monooxygenase	485	0.0	C:GO:0005737; P:GO:0006399; F:GO:0016491; C:GO:0032991; F:GO:0043167	C:cytoplasm; P:tRNA metabolic process; F:oxidoreductase activity; C:protein-containing complex; F:ion binding	EC:1.14.13.8; EC:1.14.13	Flavin-containing monooxygenase; Acting on paired donors, with incorporation or reduction of molecular oxygen. The oxygen incorporated need not be derived from O(2)	IPR000960 (PRINTS); IPR036188 (G3DSA:3.50.50.GENE3D); IPR020946 (PFAM); IPR000960 (PIRSF); PTHR23023 (PANTHER); PTHR23023 (PANTHER); PTHR23023:SF101 (PANTHER); PTHR23023:SF101 (PANTHER); NON_CYTOPLASMIC_DOMAIN (PHOBIUS); SIGNAL_PEPTIDE (PHOBIUS); SIGNAL_PEPTIDE_N_REGION (PHOBIUS); SIGNAL_PEPTIDE_H_REGION (PHOBIUS); SIGNAL_PEPTIDE_C_REGION (PHOBIUS); IPR036188 (SUPERFAMILY)	F:GO:0004499; F:GO:0050660; F:GO:0050661; P:GO:0055114	F:N,N-dimethylaniline monooxygenase activity; F:flavin adenine dinucleotide binding; F:NADP binding; P:oxidation-reduction process
maker-Pseudochromosome_1-snap-gene-14.81	hypothetical protein FVEG_09512	99	4.04677E-37					mobidb-lite (MOBIDB_LITE); mobidb-lite (MOBIDB_LITE); mobidb-lite (MOBIDB_LITE)	no GO terms	no GO terms
snap_masked-Pseudochromosome_1-processed-gene-15.45	hypothetical protein FVER14953_20959	81	2.0754E-38					no IPS match	no IPS match	no IPS match
maker-Pseudochromosome_1-snap-gene-12.3	protein CSN12	455	0.0					G3DSA:1.25.40.570 (GENE3D); IPR000717 (PFAM); IPR036388 (G3DSA:1.10.10.GENE3D); PTHR12732 (PANTHER); PTHR12732:SF0 (PANTHER); IPR000717 (PROSITE_PROFILES)	no GO terms	no GO terms
genemark-Pseudochromosome_1-processed-gene-4.50	hypothetical protein FNYG_15154	526	0.0	F:GO:0003700; C:GO:0005634; P:GO:0009058; P:GO:0034641; F:GO:0043167	F:DNA-binding transcription factor activity; C:nucleus; P:biosynthetic process; P:cellular nitrogen compound metabolic process; F:ion binding			IPR001138 (SMART); IPR036864 (G3DSA:4.10.240.GENE3D); IPR001138 (PFAM); mobidb-lite (MOBIDB_LITE); mobidb-lite (MOBIDB_LITE); PTHR31263:SF4 (PANTHER); PTHR31263 (PANTHER); IPR001138 (PROSITE_PROFILES); IPR001138 (CDD); IPR036864 (SUPERFAMILY)	F:GO:0000981; C:GO:0005634; P:GO:0006355; F:GO:0008270	F:DNA-binding transcription factor activity, RNA polymerase II-specific; C:nucleus; P:regulation of transcription, DNA-templated; F:zinc ion binding
maker-Pseudochromosome_1-snap-gene-5.97	Meiotic activator RIM4	165	4.71119E-25	F:GO:0003723	F:RNA binding			mobidb-lite (MOBIDB_LITE); mobidb-lite (MOBIDB_LITE); mobidb-lite (MOBIDB_LITE)	no GO terms	no GO terms
snap_masked-Pseudochromosome_1-processed-gene-12.71	phospho-2-dehydro-3-deoxyheptonate aldolase	471	0.0	P:GO:0006520; P:GO:0009058; F:GO:0016765	P:cellular amino acid metabolic process; P:biosynthetic process; F:transferase activity, transferring alkyl or aryl (other than methyl) groups	EC:2.5.1.54	3-deoxy-7-phosphoheptulonate synthase	IPR002480 (PFAM); mobidb-lite (MOBIDB_LITE); mobidb-lite (MOBIDB_LITE); IPR002480 (PANTHER); PTHR21337:SF15 (PANTHER); SSF51569 (SUPERFAMILY)	F:GO:0003849; P:GO:0009073	F:3-deoxy-7-phosphoheptulonate synthase activity; P:aromatic amino acid family biosynthetic process
genemark-Pseudochromosome_1-processed-gene-12.17	related to alpha/beta superfamily hydrolase	325	0.0	F:GO:0003674; C:GO:0005575	F:molecular_function; C:cellular_component			IPR029058 (G3DSA:3.40.50.GENE3D); PTHR12277:SF64 (PANTHER); PTHR12277 (PANTHER); IPR029058 (SUPERFAMILY)	no GO terms	no GO terms
snap_masked-Pseudochromosome_1-processed-gene-11.73	uncharacterized protein FMAN_00373	433	0.0					mobidb-lite (MOBIDB_LITE); mobidb-lite (MOBIDB_LITE); mobidb-lite (MOBIDB_LITE); mobidb-lite (MOBIDB_LITE); mobidb-lite (MOBIDB_LITE); mobidb-lite (MOBIDB_LITE)	no GO terms	no GO terms
genemark-Pseudochromosome_1-processed-gene-11.97	hypothetical protein FNYG_07466	678	0.0	P:GO:0000003; C:GO:0005634; C:GO:0005694; P:GO:0007049; P:GO:0007059	P:reproduction; C:nucleus; C:chromosome; P:cell cycle; P:chromosome segregation			Coil (COILS); Coil (COILS); IPR011515 (PFAM); IPR011516 (PFAM); mobidb-lite (MOBIDB_LITE); mobidb-lite (MOBIDB_LITE); mobidb-lite (MOBIDB_LITE); mobidb-lite (MOBIDB_LITE); mobidb-lite (MOBIDB_LITE); mobidb-lite (MOBIDB_LITE); mobidb-lite (MOBIDB_LITE); mobidb-lite (MOBIDB_LITE); mobidb-lite (MOBIDB_LITE); mobidb-lite (MOBIDB_LITE); mobidb-lite (MOBIDB_LITE); mobidb-lite (MOBIDB_LITE); mobidb-lite…	C:GO:0000775; C:GO:0005634; P:GO:0045132	C:chromosome, centromeric region; C:nucleus; P:meiotic chromosome segregation
genemark-Pseudochromosome_1-processed-gene-15.75	O-acetylhomoserine (thiol)-lyase	454	0.0	P:GO:0006520; F:GO:0016765; F:GO:0016829; F:GO:0043167	P:cellular amino acid metabolic process; F:transferase activity, transferring alkyl or aryl (other than methyl) groups; F:lyase activity; F:ion binding			IPR015421 (G3DSA:3.40.640.GENE3D); IPR000277 (PFAM); IPR006235 (TIGRFAM); IPR000277 (PIRSF); IPR015422 (G3DSA:3.90.1150.GENE3D); mobidb-lite (MOBIDB_LITE); PTHR43797 (PANTHER); PTHR43797:SF1 (PANTHER); IPR000277 (CDD); IPR015424 (SUPERFAMILY)	F:GO:0003824; P:GO:0006520; F:GO:0016765; F:GO:0030170	F:catalytic activity; P:cellular amino acid metabolic process; F:transferase activity, transferring alkyl or aryl (other than methyl) groups; F:pyridoxal phosphate binding
genemark-Pseudochromosome_1-processed-gene-10.24	adenosine deaminase	353	0.0	P:GO:0000278; C:GO:0005634; C:GO:0005737; P:GO:0009056; P:GO:0009058; F:GO:0016810; P:GO:0034641; F:GO:0043167; P:GO:0044281	P:mitotic cell cycle; C:nucleus; C:cytoplasm; P:catabolic process; P:biosynthetic process; F:hydrolase activity, acting on carbon-nitrogen (but not peptide) bonds; P:cellular nitrogen compound metabolic process; F:ion binding; P:small molecule metabolic process	EC:3.5.4.2	Adenine deaminase	G3DSA:3.20.20.140 (GENE3D); IPR006330 (TIGRFAM); IPR001365 (PFAM); PTHR43114 (PANTHER); PTHR43114:SF2 (PANTHER); IPR028892 (HAMAP); IPR006330 (CDD); IPR032466 (SUPERFAMILY)	F:GO:0000034; P:GO:0006146; F:GO:0019239	F:adenine deaminase activity; P:adenine catabolic process; F:deaminase activity
genemark-Pseudochromosome_1-processed-gene-8.6	related to mannosylphosphorylation protein MNN4	310	0.0					IPR007074 (PFAM); mobidb-lite (MOBIDB_LITE); PTHR15407:SF32 (PANTHER); IPR009644 (PANTHER); SIGNAL_PEPTIDE (PHOBIUS); SIGNAL_PEPTIDE_N_REGION (PHOBIUS); NON_CYTOPLASMIC_DOMAIN (PHOBIUS); SIGNAL_PEPTIDE_H_REGION (PHOBIUS); SIGNAL_PEPTIDE_C_REGION (PHOBIUS); SignalP-noTM (SIGNALP_EUK); SignalP-TM (SIGNALP_GRAM_POSITIVE); SignalP-noTM (SIGNALP_GRAM_NEGATIVE); TMhelix (TMHMM)	no GO terms	no GO terms
genemark-Pseudochromosome_1-processed-gene-13.19	related to aldehyde reductase II	342	0.0	C:GO:0005575; F:GO:0008233; F:GO:0043167	C:cellular_component; F:peptidase activity; F:ion binding	EC:3.4.24	Acting on peptide bonds (peptidases)	G3DSA:3.40.50.720 (GENE3D); IPR001509 (PFAM); PTHR10366 (PANTHER); PTHR10366:SF502 (PANTHER); cd05227 (CDD); IPR036291 (SUPERFAMILY)	F:GO:0003824; F:GO:0050662	F:catalytic activity; F:coenzyme binding
genemark-Pseudochromosome_1-processed-gene-3.86	related to C4-dicarboxylate transport protein mae1	426	0.0	C:GO:0005575; F:GO:0022857	C:cellular_component; F:transmembrane transporter activity			IPR004695 (PFAM); IPR038665 (G3DSA:1.50.10.GENE3D); mobidb-lite (MOBIDB_LITE); IPR030185 (PANTHER); TRANSMEMBRANE (PHOBIUS); TRANSMEMBRANE (PHOBIUS); TRANSMEMBRANE (PHOBIUS); NON_CYTOPLASMIC_DOMAIN (PHOBIUS); CYTOPLASMIC_DOMAIN (PHOBIUS); NON_CYTOPLASMIC_DOMAIN (PHOBIUS); NON_CYTOPLASMIC_DOMAIN (PHOBIUS); CYTOPLASMIC_DOMAIN (PHOBIUS); TRANSMEMBRANE (PHOBIUS); TRANSMEMBRANE (PHOBIUS); TRANSMEMBRAN…	F:GO:0015140; C:GO:0016021; P:GO:0055085; P:GO:0071423	F:malate transmembrane transporter activity; C:integral component of membrane; P:transmembrane transport; P:malate transmembrane transport
maker-Pseudochromosome_1-snap-gene-2.8	zinc finger protein Xfin-like	145	1.18412E-73	F:GO:0003674	F:molecular_function			IPR013087 (SMART); G3DSA:3.30.160.60 (GENE3D)	F:GO:0003676	F:nucleic acid binding
genemark-Pseudochromosome_1-processed-gene-14.8	related to serine protease	518	0.0	F:GO:0008233	F:peptidase activity			IPR029058 (G3DSA:3.40.50.GENE3D); IPR008758 (PFAM); PTHR11010 (PANTHER); PTHR11010:SF23 (PANTHER); SIGNAL_PEPTIDE_C_REGION (PHOBIUS); SIGNAL_PEPTIDE_N_REGION (PHOBIUS); SIGNAL_PEPTIDE (PHOBIUS); SIGNAL_PEPTIDE_H_REGION (PHOBIUS); NON_CYTOPLASMIC_DOMAIN (PHOBIUS); SignalP-noTM (SIGNALP_EUK)	P:GO:0006508; F:GO:0008236	P:proteolysis; F:serine-type peptidase activity
maker-Pseudochromosome_1-snap-gene-7.0	Uncharacterized protein LW93_11356	168	2.02439E-66					mobidb-lite (MOBIDB_LITE)	no GO terms	no GO terms
genemark-Pseudochromosome_1-processed-gene-1.38	MFS multidrug transporter	505	0.0	C:GO:0005575; P:GO:0055085	C:cellular_component; P:transmembrane transport			G3DSA:1.20.1250.20 (GENE3D); IPR011701 (PFAM); mobidb-lite (MOBIDB_LITE); mobidb-lite (MOBIDB_LITE); mobidb-lite (MOBIDB_LITE); mobidb-lite (MOBIDB_LITE); PTHR23502 (PANTHER); PTHR23502:SF60 (PANTHER); NON_CYTOPLASMIC_DOMAIN (PHOBIUS); TRANSMEMBRANE (PHOBIUS); TRANSMEMBRANE (PHOBIUS); TRANSMEMBRANE (PHOBIUS); CYTOPLASMIC_DOMAIN (PHOBIUS); CYTOPLASMIC_DOMAIN (PHOBIUS); TRANSMEMBRANE (PHOBIUS); TRA…	C:GO:0016021; P:GO:0055085	C:integral component of membrane; P:transmembrane transport
genemark-Pseudochromosome_1-processed-gene-2.84	probable D-amino-acid oxidase	353	0.0	C:GO:0005575; P:GO:0006520; F:GO:0016491; F:GO:0043167	C:cellular_component; P:cellular amino acid metabolic process; F:oxidoreductase activity; F:ion binding	EC:1.4.3.3	D-amino-acid oxidase	IPR023209 (PIRSF); IPR006076 (PFAM); G3DSA:3.40.50.720 (GENE3D); G3DSA:3.30.9.10 (GENE3D); IPR023209 (PANTHER); PTHR11530:SF16 (PANTHER); TRANSMEMBRANE (PHOBIUS); CYTOPLASMIC_DOMAIN (PHOBIUS); NON_CYTOPLASMIC_DOMAIN (PHOBIUS); SSF51971 (SUPERFAMILY); SSF54373 (SUPERFAMILY); TMhelix (TMHMM)	F:GO:0003884; F:GO:0016491; P:GO:0046416; P:GO:0055114; F:GO:0071949	F:D-amino-acid oxidase activity; F:oxidoreductase activity; P:D-amino acid metabolic process; P:oxidation-reduction process; F:FAD binding
genemark-Pseudochromosome_1-processed-gene-9.24	hypothetical protein FNYG_08921	2067	0.0	F:GO:0008233	F:peptidase activity	EC:3.4.23	Acting on peptide bonds (peptidases)	IPR002110 (SMART); PF13637 (PFAM); IPR020683 (PFAM); IPR007111 (PFAM); G3DSA:3.40.50.300 (GENE3D); IPR002110 (PFAM); IPR036770 (G3DSA:1.25.40.GENE3D); IPR036770 (G3DSA:1.25.40.GENE3D); IPR036770 (G3DSA:1.25.40.GENE3D); G3DSA:1.25.40.960 (GENE3D); PTHR43928:SF1 (PANTHER); PTHR43928 (PANTHER); PTHR43928 (PANTHER); PTHR43928 (PANTHER); PTHR43928:SF1 (PANTHER); PTHR43928:SF1 (PANTHER); IPR002110 (PRO…	F:GO:0005515	F:protein binding
snap_masked-Pseudochromosome_1-processed-gene-8.56	uncharacterized protein FPRN_00261	837	0.0	C:GO:0005575; P:GO:0006464; F:GO:0008233	C:cellular_component; P:cellular protein modification process; F:peptidase activity	EC:3.4.19.12	Ubiquitinyl hydrolase 1	Coil (COILS); Coil (COILS); IPR033979 (PFAM); mobidb-lite (MOBIDB_LITE); mobidb-lite (MOBIDB_LITE); mobidb-lite (MOBIDB_LITE); mobidb-lite (MOBIDB_LITE); mobidb-lite (MOBIDB_LITE); mobidb-lite (MOBIDB_LITE); mobidb-lite (MOBIDB_LITE); mobidb-lite (MOBIDB_LITE); mobidb-lite (MOBIDB_LITE); mobidb-lite (MOBIDB_LITE); IPR007518 (PANTHER); PTHR18063:SF6 (PANTHER)	F:GO:0004843; F:GO:1990380	F:thiol-dependent ubiquitin-specific protease activity; F:Lys48-specific deubiquitinase activity
snap_masked-Pseudochromosome_1-processed-gene-14.35	probable SOF1 protein	445	0.0	F:GO:0003674; C:GO:0005730; C:GO:0032991; P:GO:0034641; P:GO:0042254	F:molecular_function; C:nucleolus; C:protein-containing complex; P:cellular nitrogen compound metabolic process; P:ribosome biogenesis			Coil (COILS); IPR020472 (PRINTS); IPR001680 (SMART); IPR001680 (PFAM); IPR007287 (PFAM); IPR015943 (G3DSA:2.130.10.GENE3D); IPR015943 (G3DSA:2.130.10.GENE3D); mobidb-lite (MOBIDB_LITE); mobidb-lite (MOBIDB_LITE); mobidb-lite (MOBIDB_LITE); PTHR22851 (PANTHER); IPR001680 (PROSITE_PROFILES); IPR001680 (PROSITE_PROFILES); IPR017986 (PROSITE_PROFILES); IPR001680 (PROSITE_PROFILES); cd00200 (CDD); IPR…	F:GO:0005515	F:protein binding
snap_masked-Pseudochromosome_1-processed-gene-8.59	hypothetical protein FVEG_16647	213	9.04879E-53					mobidb-lite (MOBIDB_LITE); mobidb-lite (MOBIDB_LITE); mobidb-lite (MOBIDB_LITE)	no GO terms	no GO terms
genemark-Pseudochromosome_1-processed-gene-11.81	hypothetical protein FNYG_07463	825	0.0					IPR018744 (PFAM); mobidb-lite (MOBIDB_LITE); mobidb-lite (MOBIDB_LITE); mobidb-lite (MOBIDB_LITE); mobidb-lite (MOBIDB_LITE); mobidb-lite (MOBIDB_LITE); mobidb-lite (MOBIDB_LITE); mobidb-lite (MOBIDB_LITE); PTHR38113:SF1 (PANTHER); PTHR38113 (PANTHER)	no GO terms	no GO terms
snap_masked-Pseudochromosome_1-processed-gene-1.109	Uncharacterized protein LW94_11125	448	0.0					no IPS match	no IPS match	no IPS match
genemark-Pseudochromosome_1-processed-gene-11.78	related to regulator of deoxyribodipyrimidine photo-lyase PHR1	1496	0.0	C:GO:0005634; F:GO:0016829; F:GO:0043167	C:nucleus; F:lyase activity; F:ion binding			Coil (COILS); IPR003349 (SMART); IPR001965 (SMART); IPR003347 (SMART); G3DSA:2.60.120.650 (GENE3D); IPR003349 (PFAM); IPR013083 (G3DSA:3.30.40.GENE3D); IPR003347 (PFAM); G3DSA:2.60.120.650 (GENE3D); PF13832 (PFAM); mobidb-lite (MOBIDB_LITE); mobidb-lite (MOBIDB_LITE); mobidb-lite (MOBIDB_LITE); mobidb-lite (MOBIDB_LITE); mobidb-lite (MOBIDB_LITE); mobidb-lite (MOBIDB_LITE); mobidb-lite (MOBIDB_LI…	no GO terms	no GO terms
genemark-Pseudochromosome_1-processed-gene-1.22	related to tyrosinase	448	0.0	F:GO:0016491; F:GO:0043167	F:oxidoreductase activity; F:ion binding			IPR008922 (G3DSA:1.10.1280.GENE3D); IPR002227 (PFAM); PTHR11474:SF70 (PANTHER); PTHR11474 (PANTHER); IPR008922 (SUPERFAMILY)	F:GO:0016491	F:oxidoreductase activity
genemark-Pseudochromosome_1-processed-gene-13.22	related to glycerophosphocholine (GroPCho) phosphodiesterase	1175	0.0	F:GO:0003674; P:GO:0006629; P:GO:0009056	F:molecular_function; P:lipid metabolic process; P:catabolic process	EC:3.1.4.2	Glycerophosphocholine phosphodiesterase	IPR002110 (SMART); IPR030395 (PFAM); IPR020683 (PFAM); IPR004331 (PFAM); IPR036770 (G3DSA:1.25.40.GENE3D); mobidb-lite (MOBIDB_LITE); mobidb-lite (MOBIDB_LITE); mobidb-lite (MOBIDB_LITE); mobidb-lite (MOBIDB_LITE); mobidb-lite (MOBIDB_LITE); PTHR22958 (PANTHER); IPR033506 (PTHR22958:PANTHER); IPR030395 (PROSITE_PROFILES); IPR002110 (PROSITE_PROFILES); IPR020683 (PROSITE_PROFILES); IPR004331 (PROS…	F:GO:0005515; P:GO:0006629; F:GO:0008081; P:GO:0046475; F:GO:0047389	F:protein binding; P:lipid metabolic process; F:phosphoric diester hydrolase activity; P:glycerophospholipid catabolic process; F:glycerophosphocholine phosphodiesterase activity
genemark-Pseudochromosome_1-processed-gene-5.35	related to kinesin-like protein	1722	0.0	F:GO:0008092; P:GO:0008150; F:GO:0043167	F:cytoskeletal protein binding; P:biological_process; F:ion binding	EC:3.6.1.15	Nucleoside-triphosphate phosphatase	Coil (COILS); Coil (COILS); Coil (COILS); Coil (COILS); Coil (COILS); Coil (COILS); Coil (COILS); Coil (COILS); Coil (COILS); Coil (COILS); Coil (COILS); Coil (COILS); Coil (COILS); Coil (COILS); Coil (COILS); Coil (COILS); Coil (COILS); Coil (COILS); IPR001752 (PRINTS); IPR001752 (SMART); IPR001752 (PFAM); IPR036961 (G3DSA:3.40.850.GENE3D); mobidb-lite (MOBIDB_LITE); mobidb-lite (MOBIDB_LITE); m…	F:GO:0003777; F:GO:0005524; P:GO:0007018; F:GO:0008017	F:microtubule motor activity; F:ATP binding; P:microtubule-based movement; F:microtubule binding
genemark-Pseudochromosome_1-processed-gene-9.2	probable flavin-containing monooxygenase	93	6.27564E-57	C:GO:0005737; P:GO:0006399; F:GO:0016491; C:GO:0032991; F:GO:0043167	C:cytoplasm; P:tRNA metabolic process; F:oxidoreductase activity; C:protein-containing complex; F:ion binding	EC:1.14.13.8; EC:1.14.13	Flavin-containing monooxygenase; Acting on paired donors, with incorporation or reduction of molecular oxygen. The oxygen incorporated need not be derived from O(2)	TRANSMEMBRANE (PHOBIUS); NON_CYTOPLASMIC_DOMAIN (PHOBIUS); CYTOPLASMIC_DOMAIN (PHOBIUS); TMhelix (TMHMM)	no GO terms	no GO terms
snap_masked-Pseudochromosome_1-processed-gene-6.55	uncharacterized protein Y057_14828	293	4.92108E-171					mobidb-lite (MOBIDB_LITE); mobidb-lite (MOBIDB_LITE); mobidb-lite (MOBIDB_LITE); mobidb-lite (MOBIDB_LITE)	no GO terms	no GO terms
maker-Pseudochromosome_1-augustus-gene-3.14	putative methyltransferase domain-containing protein	283	1.25155E-170	F:GO:0008168; F:GO:0016740; P:GO:0032259	F:methyltransferase activity; F:transferase activity; P:methylation			PF13489 (PFAM); G3DSA:3.40.50.150 (GENE3D); PTHR43591:SF11 (PANTHER); PTHR43591 (PANTHER); cd02440 (CDD); IPR029063 (SUPERFAMILY)	no GO terms	no GO terms
snap_masked-Pseudochromosome_1-processed-gene-10.41	uncharacterized protein FPRN_00317	244	4.45969E-163	C:GO:0005575	C:cellular_component			mobidb-lite (MOBIDB_LITE); mobidb-lite (MOBIDB_LITE); mobidb-lite (MOBIDB_LITE); mobidb-lite (MOBIDB_LITE); mobidb-lite (MOBIDB_LITE); NON_CYTOPLASMIC_DOMAIN (PHOBIUS); TRANSMEMBRANE (PHOBIUS); CYTOPLASMIC_DOMAIN (PHOBIUS); TMhelix (TMHMM)	no GO terms	no GO terms
snap_masked-Pseudochromosome_1-processed-gene-8.78	uncharacterized protein FMAN_00280	560	0.0					no IPS match	no IPS match	no IPS match
snap_masked-Pseudochromosome_1-processed-gene-1.94	n- gnat protein	264	0.0					G3DSA:3.40.630.30 (GENE3D); IPR000182 (PFAM); mobidb-lite (MOBIDB_LITE); PTHR43792 (PANTHER); IPR000182 (PROSITE_PROFILES); cd04301 (CDD); IPR016181 (SUPERFAMILY)	no GO terms	no GO terms
augustus_masked-Pseudochromosome_1-processed-gene-0.14	Major facilitator superfamily transporter	515	1.33402E-165	C:GO:0005575; P:GO:0055085	C:cellular_component; P:transmembrane transport			G3DSA:1.20.1250.20 (GENE3D); IPR011701 (PFAM); PTHR43791:SF17 (PANTHER); PTHR43791 (PANTHER); TRANSMEMBRANE (PHOBIUS); TRANSMEMBRANE (PHOBIUS); NON_CYTOPLASMIC_DOMAIN (PHOBIUS); TRANSMEMBRANE (PHOBIUS); CYTOPLASMIC_DOMAIN (PHOBIUS); CYTOPLASMIC_DOMAIN (PHOBIUS); NON_CYTOPLASMIC_DOMAIN (PHOBIUS); NON_CYTOPLASMIC_DOMAIN (PHOBIUS); TRANSMEMBRANE (PHOBIUS); CYTOPLASMIC_DOMAIN (PHOBIUS); TRANSMEMBRANE…	C:GO:0016021; P:GO:0055085	C:integral component of membrane; P:transmembrane transport
genemark-Pseudochromosome_1-processed-gene-6.97	hypothetical protein FNYG_08824	256	0.0					mobidb-lite (MOBIDB_LITE); mobidb-lite (MOBIDB_LITE); NON_CYTOPLASMIC_DOMAIN (PHOBIUS); SIGNAL_PEPTIDE (PHOBIUS); SIGNAL_PEPTIDE_N_REGION (PHOBIUS); SIGNAL_PEPTIDE_C_REGION (PHOBIUS); SIGNAL_PEPTIDE_H_REGION (PHOBIUS); SignalP-noTM (SIGNALP_EUK); SignalP-noTM (SIGNALP_GRAM_NEGATIVE)	no GO terms	no GO terms
maker-Pseudochromosome_1-snap-gene-7.3	hypothetical protein FVEG_09734	245	3.46422E-35	C:GO:0005575	C:cellular_component			mobidb-lite (MOBIDB_LITE); mobidb-lite (MOBIDB_LITE)	no GO terms	no GO terms
genemark-Pseudochromosome_1-processed-gene-2.111	acetyl-coenzyme A synthetase	663	0.0	P:GO:0006790; P:GO:0009058; F:GO:0016874; P:GO:0034641; F:GO:0043167; P:GO:0044281; P:GO:0051186	P:sulfur compound metabolic process; P:biosynthetic process; F:ligase activity; P:cellular nitrogen compound metabolic process; F:ion binding; P:small molecule metabolic process; P:cofactor metabolic process	EC:6.2.1.1	Acetate--CoA ligase	G3DSA:3.40.50.12780 (GENE3D); G3DSA:3.30.300.30 (GENE3D); IPR000873 (PFAM); IPR032387 (PFAM); IPR011904 (TIGRFAM); IPR025110 (PFAM); PTHR24095 (PANTHER); PTHR24095:SF245 (PANTHER); IPR011904 (CDD); SSF56801 (SUPERFAMILY)	F:GO:0003824; F:GO:0003987; F:GO:0016208; P:GO:0019427	F:catalytic activity; F:acetate-CoA ligase activity; F:AMP binding; P:acetyl-CoA biosynthetic process from acetate
snap_masked-Pseudochromosome_1-processed-gene-13.58	related to tRNA-splicing endonuclease	451	0.0	F:GO:0004518	F:nuclease activity			IPR024336 (PFAM); mobidb-lite (MOBIDB_LITE); mobidb-lite (MOBIDB_LITE); mobidb-lite (MOBIDB_LITE); IPR024337 (PANTHER)	no GO terms	no GO terms
genemark-Pseudochromosome_1-processed-gene-12.14	uncharacterized protein LW93_11492	348	0.0	C:GO:0005575	C:cellular_component			mobidb-lite (MOBIDB_LITE); TRANSMEMBRANE (PHOBIUS); CYTOPLASMIC_DOMAIN (PHOBIUS); NON_CYTOPLASMIC_DOMAIN (PHOBIUS); TMhelix (TMHMM)	no GO terms	no GO terms
genemark-Pseudochromosome_1-processed-gene-13.6	probable arrestin domain protein	389	0.0					IPR011022 (SMART); IPR011022 (PFAM); PTHR36419 (PANTHER)	no GO terms	no GO terms
genemark-Pseudochromosome_1-processed-gene-6.105	taurine dioxygenase	379	0.0	F:GO:0016491	F:oxidoreductase activity			G3DSA:3.60.130.10 (GENE3D); IPR003819 (PFAM); PTHR30468 (PANTHER); PTHR30468:SF19 (PANTHER); SSF51197 (SUPERFAMILY)	F:GO:0016491; P:GO:0055114	F:oxidoreductase activity; P:oxidation-reduction process
maker-Pseudochromosome_1-augustus-gene-11.14	related to heterokaryon incompatibility protein het-6	694	0.0	F:GO:0003700; P:GO:0009058; P:GO:0034641	F:DNA-binding transcription factor activity; P:biosynthetic process; P:cellular nitrogen compound metabolic process			IPR010730 (PFAM); mobidb-lite (MOBIDB_LITE); mobidb-lite (MOBIDB_LITE); PTHR24148:SF57 (PANTHER); PTHR24148 (PANTHER); SignalP-TM (SIGNALP_GRAM_POSITIVE)	no GO terms	no GO terms
genemark-Pseudochromosome_1-processed-gene-7.26	transcription initiation factor TFIID subunit 10	188	7.86872E-131	F:GO:0005198; C:GO:0005654; P:GO:0006464; F:GO:0008135; C:GO:0032991; P:GO:0051276; P:GO:0065003	F:structural molecule activity; C:nucleoplasm; P:cellular protein modification process; F:translation factor activity, RNA binding; C:protein-containing complex; P:chromosome organization; P:protein-containing complex assembly			IPR003923 (PIRSF); IPR003923 (PFAM); mobidb-lite (MOBIDB_LITE); mobidb-lite (MOBIDB_LITE); mobidb-lite (MOBIDB_LITE); IPR003923 (PANTHER); IPR003923 (CDD)	C:GO:0005634; P:GO:0006352	C:nucleus; P:DNA-templated transcription, initiation
snap_masked-Pseudochromosome_1-processed-gene-6.52	ankyrin repeat protein	277	1.10559E-40	C:GO:0016020; C:GO:0016021	C:membrane; C:integral component of membrane			mobidb-lite (MOBIDB_LITE); mobidb-lite (MOBIDB_LITE); mobidb-lite (MOBIDB_LITE); mobidb-lite (MOBIDB_LITE); mobidb-lite (MOBIDB_LITE)	no GO terms	no GO terms
genemark-Pseudochromosome_1-processed-gene-15.81	plasma membrane ATPase	905	0.0	C:GO:0005886; F:GO:0016887; F:GO:0022857; F:GO:0043167	C:plasma membrane; F:ATPase activity; F:transmembrane transporter activity; F:ion binding	EC:3.6.1.3; EC:3.6.3.6; EC:3.6.1.15	Adenosinetriphosphatase; Proton-exporting ATPase; Nucleoside-triphosphate phosphatase	IPR001757 (PRINTS); PR00119 (PRINTS); IPR004014 (SMART); IPR023214 (G3DSA:3.40.50.GENE3D); PF00122 (PFAM); IPR001757 (TIGRFAM); G3DSA:1.20.1110.10 (GENE3D); IPR023299 (G3DSA:3.40.1110.GENE3D); PF00702 (PFAM); IPR006534 (TIGRFAM); IPR004014 (PFAM); G3DSA:2.60.120.1500 (GENE3D),SFLDS00003 (SFLD),SFLDF00027 (SFLD); mobidb-lite (MOBIDB_LITE); mobidb-lite (MOBIDB_LITE); mobidb-lite (MOBIDB_LITE); PTHR…	F:GO:0000166; F:GO:0008553; C:GO:0016021; P:GO:0120029	F:nucleotide binding; F:proton-exporting ATPase activity, phosphorylative mechanism; C:integral component of membrane; P:proton export across plasma membrane
maker-Pseudochromosome_1-snap-gene-4.3	uncharacterized protein FFUJ_01972	1392	0.0	F:GO:0003677; F:GO:0003700; C:GO:0005634; P:GO:0009058; F:GO:0022857; P:GO:0034641; F:GO:0043167	F:DNA binding; F:DNA-binding transcription factor activity; C:nucleus; P:biosynthetic process; F:transmembrane transporter activity; P:cellular nitrogen compound metabolic process; F:ion binding			IPR007219 (SMART); IPR001248 (PFAM); IPR012681 (TIGRFAM); IPR038271 (G3DSA:1.10.4160.GENE3D); IPR007219 (PFAM); mobidb-lite (MOBIDB_LITE); mobidb-lite (MOBIDB_LITE); mobidb-lite (MOBIDB_LITE); mobidb-lite (MOBIDB_LITE); mobidb-lite (MOBIDB_LITE); PTHR30618 (PANTHER); PTHR30618:SF11 (PANTHER); TRANSMEMBRANE (PHOBIUS); NON_CYTOPLASMIC_DOMAIN (PHOBIUS); TRANSMEMBRANE (PHOBIUS); CYTOPLASMIC_DOMAIN (P…	F:GO:0003677; C:GO:0005634; P:GO:0006351; F:GO:0008270; C:GO:0016020; F:GO:0022857; P:GO:0055085	F:DNA binding; C:nucleus; P:transcription, DNA-templated; F:zinc ion binding; C:membrane; F:transmembrane transporter activity; P:transmembrane transport
genemark-Pseudochromosome_1-processed-gene-4.52	uncharacterized protein FPRO_00172	497	0.0					no IPS match	no IPS match	no IPS match
genemark-Pseudochromosome_1-processed-gene-8.3	related to steroid 5 alpha-reductase	297	0.0	C:GO:0005575; P:GO:0006464; P:GO:0006629; F:GO:0008233; F:GO:0016491	C:cellular_component; P:cellular protein modification process; P:lipid metabolic process; F:peptidase activity; F:oxidoreductase activity	EC:1.3.99.5; EC:3.4.19.12	3-oxo-5-alpha-steroid 4-dehydrogenase (acceptor); Ubiquitinyl hydrolase 1	IPR016636 (PIRSF); IPR001104 (PFAM); IPR039357 (PANTHER); PTHR10556:SF43 (PANTHER); NON_CYTOPLASMIC_DOMAIN (PHOBIUS); TRANSMEMBRANE (PHOBIUS); TRANSMEMBRANE (PHOBIUS); CYTOPLASMIC_DOMAIN (PHOBIUS); TRANSMEMBRANE (PHOBIUS); NON_CYTOPLASMIC_DOMAIN (PHOBIUS); NON_CYTOPLASMIC_DOMAIN (PHOBIUS); TRANSMEMBRANE (PHOBIUS); CYTOPLASMIC_DOMAIN (PHOBIUS); TRANSMEMBRANE (PHOBIUS); CYTOPLASMIC_DOMAIN (PHOBIUS)…	F:GO:0003865; P:GO:0006629; P:GO:0008202; C:GO:0016020; F:GO:0016627; P:GO:0055114	F:3-oxo-5-alpha-steroid 4-dehydrogenase activity; P:lipid metabolic process; P:steroid metabolic process; C:membrane; F:oxidoreductase activity, acting on the CH-CH group of donors; P:oxidation-reduction process
maker-Pseudochromosome_1-snap-gene-15.6	hypothetical protein FOXG_11302	629	0.0					mobidb-lite (MOBIDB_LITE); mobidb-lite (MOBIDB_LITE); mobidb-lite (MOBIDB_LITE); mobidb-lite (MOBIDB_LITE); mobidb-lite (MOBIDB_LITE)	no GO terms	no GO terms
snap_masked-Pseudochromosome_1-processed-gene-1.106	uncharacterized protein FFB14_11456	644	0.0	F:GO:0003677; F:GO:0003700; C:GO:0005634; P:GO:0009058; P:GO:0034641; F:GO:0043167	F:DNA binding; F:DNA-binding transcription factor activity; C:nucleus; P:biosynthetic process; P:cellular nitrogen compound metabolic process; F:ion binding			IPR036864 (G3DSA:4.10.240.GENE3D); IPR001138 (PFAM); mobidb-lite (MOBIDB_LITE); PTHR31001 (PANTHER); cd12148 (CDD); IPR001138 (CDD); IPR036864 (SUPERFAMILY)	F:GO:0000981; C:GO:0005634; P:GO:0006355; F:GO:0008270	F:DNA-binding transcription factor activity, RNA polymerase II-specific; C:nucleus; P:regulation of transcription, DNA-templated; F:zinc ion binding
snap_masked-Pseudochromosome_1-processed-gene-0.2	het protein	458	0.0	F:GO:0003824; P:GO:0009116	F:catalytic activity; P:nucleoside metabolic process			IPR010730 (PFAM); mobidb-lite (MOBIDB_LITE); PTHR24148:SF59 (PANTHER); PTHR24148 (PANTHER)	no GO terms	no GO terms
genemark-Pseudochromosome_1-processed-gene-3.91	hypothetical protein FVER14953_09862	333	0.0					G3DSA:3.40.50.150 (GENE3D); IPR025714 (PFAM); PTHR32026:SF10 (PANTHER); IPR026913 (PANTHER); SIGNAL_PEPTIDE_N_REGION (PHOBIUS); SIGNAL_PEPTIDE (PHOBIUS); SIGNAL_PEPTIDE_H_REGION (PHOBIUS); SIGNAL_PEPTIDE_C_REGION (PHOBIUS); NON_CYTOPLASMIC_DOMAIN (PHOBIUS); IPR029063 (SUPERFAMILY); TMhelix (TMHMM)	no GO terms	no GO terms
genemark-Pseudochromosome_1-processed-gene-11.100	related to ATP-dependent RNA helicase	674	0.0	F:GO:0004386; F:GO:0043167	F:helicase activity; F:ion binding	EC:3.6.1.15	Nucleoside-triphosphate phosphatase	IPR014001 (SMART); IPR007502 (SMART); IPR001650 (SMART); IPR011709 (PFAM); G3DSA:3.40.50.300 (GENE3D); G3DSA:3.40.50.300 (GENE3D); G3DSA:1.20.120.1080 (GENE3D); IPR007502 (PFAM); IPR001650 (PFAM); PTHR18934 (PANTHER); PTHR18934:SF136 (PANTHER); IPR001650 (PROSITE_PROFILES); IPR014001 (PROSITE_PROFILES); cd00046 (CDD); IPR001650 (CDD); IPR027417 (SUPERFAMILY)	F:GO:0004386	F:helicase activity
snap_masked-Pseudochromosome_1-processed-gene-11.51	Ankyrin repeat protein nuc-2	1042	0.0	F:GO:0003674; C:GO:0005575; P:GO:0006629	F:molecular_function; C:cellular_component; P:lipid metabolic process			IPR002110 (SMART); IPR004331 (PFAM); IPR030395 (PFAM); IPR020683 (PFAM); IPR036770 (G3DSA:1.25.40.GENE3D); IPR017946 (G3DSA:3.20.20.GENE3D); mobidb-lite (MOBIDB_LITE); PTHR10783 (PANTHER); PTHR10783:SF85 (PANTHER); IPR002110 (PROSITE_PROFILES); IPR002110 (PROSITE_PROFILES); IPR020683 (PROSITE_PROFILES); IPR030395 (PROSITE_PROFILES); IPR004331 (PROSITE_PROFILES); IPR002110 (PROSITE_PROFILES); IPR0…	F:GO:0005515; P:GO:0006629; F:GO:0008081	F:protein binding; P:lipid metabolic process; F:phosphoric diester hydrolase activity
genemark-Pseudochromosome_1-processed-gene-12.36	hypothetical protein FNYG_07511	1143	0.0	F:GO:0003677	F:DNA binding			IPR036420 (G3DSA:3.40.50.GENE3D); mobidb-lite (MOBIDB_LITE); mobidb-lite (MOBIDB_LITE); mobidb-lite (MOBIDB_LITE); mobidb-lite (MOBIDB_LITE); mobidb-lite (MOBIDB_LITE); mobidb-lite (MOBIDB_LITE); mobidb-lite (MOBIDB_LITE); mobidb-lite (MOBIDB_LITE); mobidb-lite (MOBIDB_LITE); mobidb-lite (MOBIDB_LITE); mobidb-lite (MOBIDB_LITE); mobidb-lite (MOBIDB_LITE); mobidb-lite (MOBIDB_LITE); mobidb-lite (M…	no GO terms	no GO terms
genemark-Pseudochromosome_1-processed-gene-4.19	phosphotransferase family protein	171	1.74146E-85	F:GO:0003674; C:GO:0005575	F:molecular_function; C:cellular_component			G3DSA:3.90.1200.10 (GENE3D); IPR002575 (PFAM); PTHR21310 (PANTHER); PTHR21310:SF16 (PANTHER); IPR011009 (SUPERFAMILY)	no GO terms	no GO terms
snap_masked-Pseudochromosome_1-processed-gene-3.44	uncharacterized protein FMAN_00124	74	3.61521E-37					SIGNAL_PEPTIDE_H_REGION (PHOBIUS); SIGNAL_PEPTIDE_C_REGION (PHOBIUS); SIGNAL_PEPTIDE_N_REGION (PHOBIUS); SIGNAL_PEPTIDE (PHOBIUS); NON_CYTOPLASMIC_DOMAIN (PHOBIUS); SignalP-TM (SIGNALP_GRAM_NEGATIVE); SignalP-TM (SIGNALP_EUK); SignalP-TM (SIGNALP_GRAM_POSITIVE); TMhelix (TMHMM); TMhelix (TMHMM)	no GO terms	no GO terms
snap_masked-Pseudochromosome_1-processed-gene-13.80	related to pyridoxamine phosphate oxidase family protein	276	0.0	F:GO:0003674; C:GO:0005575	F:molecular_function; C:cellular_component			IPR012349 (G3DSA:2.30.110.GENE3D); PTHR39336 (PANTHER); PTHR39336:SF1 (PANTHER); NON_CYTOPLASMIC_DOMAIN (PHOBIUS); CYTOPLASMIC_DOMAIN (PHOBIUS); TRANSMEMBRANE (PHOBIUS); TMhelix (TMHMM)	F:GO:0048037	F:cofactor binding
snap_masked-Pseudochromosome_1-processed-gene-9.42	related to RSA4-WD-repeat protein required for maturation and efficient intra-nuclear transport	86	7.93339E-19	F:GO:0003674; P:GO:0034641; P:GO:0044281	F:molecular_function; P:cellular nitrogen compound metabolic process; P:small molecule metabolic process			no IPS match	no IPS match	no IPS match
genemark-Pseudochromosome_1-processed-gene-1.35	hypothetical protein FVEG_09935	303	5.01686E-145					mobidb-lite (MOBIDB_LITE); NON_CYTOPLASMIC_DOMAIN (PHOBIUS); SIGNAL_PEPTIDE (PHOBIUS); SIGNAL_PEPTIDE_H_REGION (PHOBIUS); SIGNAL_PEPTIDE_C_REGION (PHOBIUS); SIGNAL_PEPTIDE_N_REGION (PHOBIUS); SignalP-TM (SIGNALP_GRAM_POSITIVE); SignalP-noTM (SIGNALP_GRAM_NEGATIVE); SignalP-noTM (SIGNALP_EUK)	no GO terms	no GO terms
snap_masked-Pseudochromosome_1-processed-gene-2.55	related to ketoreductase	257	5.48155E-166					IPR002347 (PRINTS); IPR002347 (PFAM); G3DSA:3.40.50.720 (GENE3D); PTHR43544 (PANTHER); PTHR43544:SF7 (PANTHER); cd05325 (CDD); IPR036291 (SUPERFAMILY)	no GO terms	no GO terms
snap_masked-Pseudochromosome_1-processed-gene-4.101	uncharacterized protein LW93_11272	240	4.54032E-167					SIGNAL_PEPTIDE_H_REGION (PHOBIUS); SIGNAL_PEPTIDE_C_REGION (PHOBIUS); SIGNAL_PEPTIDE_N_REGION (PHOBIUS); SIGNAL_PEPTIDE (PHOBIUS); NON_CYTOPLASMIC_DOMAIN (PHOBIUS); SignalP-noTM (SIGNALP_EUK); SignalP-noTM (SIGNALP_GRAM_NEGATIVE)	no GO terms	no GO terms
genemark-Pseudochromosome_1-processed-gene-14.15	related to short-chain dehydrogenase/reductase	353	0.0	C:GO:0005575	C:cellular_component			IPR002347 (PRINTS); IPR002347 (PRINTS); IPR002347 (PFAM); G3DSA:3.40.50.720 (GENE3D); PTHR24322 (PANTHER); PTHR24322:SF634 (PANTHER); TRANSMEMBRANE (PHOBIUS); TRANSMEMBRANE (PHOBIUS); NON_CYTOPLASMIC_DOMAIN (PHOBIUS); CYTOPLASMIC_DOMAIN (PHOBIUS); NON_CYTOPLASMIC_DOMAIN (PHOBIUS); cd05339 (CDD); IPR036291 (SUPERFAMILY)	no GO terms	no GO terms
genemark-Pseudochromosome_1-processed-gene-12.42	Choline-sulfatase	552	0.0	F:GO:0003674	F:molecular_function	EC:3.1.6.1	Arylsulfatase	IPR000917 (PFAM); IPR025863 (PFAM); IPR017849 (G3DSA:3.40.720.GENE3D); IPR017785 (TIGRFAM); mobidb-lite (MOBIDB_LITE); mobidb-lite (MOBIDB_LITE); PTHR10342:SF261 (PANTHER); PTHR10342 (PANTHER); IPR017785 (CDD); IPR017850 (SUPERFAMILY)	F:GO:0003824; F:GO:0008484	F:catalytic activity; F:sulfuric ester hydrolase activity
snap_masked-Pseudochromosome_1-processed-gene-5.67	related to UDPglucose 4-epimerase	333	0.0	F:GO:0003674	F:molecular_function			IPR001509 (PFAM); G3DSA:3.40.50.720 (GENE3D); PTHR43349 (PANTHER); PTHR43349:SF23 (PANTHER); cd08946 (CDD); IPR036291 (SUPERFAMILY)	F:GO:0003824; F:GO:0050662	F:catalytic activity; F:coenzyme binding
genemark-Pseudochromosome_1-processed-gene-8.16	26S protease regulatory subunit 8	389	0.0	C:GO:0005737; F:GO:0008233; P:GO:0009056; F:GO:0016887; C:GO:0032991; F:GO:0043167	C:cytoplasm; F:peptidase activity; P:catabolic process; F:ATPase activity; C:protein-containing complex; F:ion binding	EC:3.6.1.3; EC:3.6.1.15	Adenosinetriphosphatase; Nucleoside-triphosphate phosphatase	Coil (COILS); IPR003593 (SMART); G3DSA:3.40.50.300 (GENE3D); IPR032501 (PFAM); G3DSA:2.40.50.140 (GENE3D); G3DSA:1.10.8.60 (GENE3D); PF17862 (PFAM); IPR005937 (TIGRFAM); IPR003959 (PFAM); PTHR23073 (PANTHER); IPR035261 (PTHR23073:PANTHER); cd00009 (CDD); IPR027417 (SUPERFAMILY)	F:GO:0005524; C:GO:0005737; F:GO:0016787; P:GO:0030163; F:GO:0036402	F:ATP binding; C:cytoplasm; F:hydrolase activity; P:protein catabolic process; F:proteasome-activating ATPase activity
snap_masked-Pseudochromosome_1-processed-gene-15.64	predicted protein	103	2.72256E-40					mobidb-lite (MOBIDB_LITE); mobidb-lite (MOBIDB_LITE); mobidb-lite (MOBIDB_LITE); mobidb-lite (MOBIDB_LITE)	no GO terms	no GO terms
snap_masked-Pseudochromosome_1-processed-gene-4.123	hypothetical protein FVEG_09816	618	0.0	F:GO:0003677; F:GO:0003700; C:GO:0005634; P:GO:0009058; P:GO:0034641; F:GO:0043167	F:DNA binding; F:DNA-binding transcription factor activity; C:nucleus; P:biosynthetic process; P:cellular nitrogen compound metabolic process; F:ion binding			IPR007219 (SMART); IPR001138 (PFAM); mobidb-lite (MOBIDB_LITE); PTHR31405:SF13 (PANTHER); PTHR31405 (PANTHER); CYTOPLASMIC_DOMAIN (PHOBIUS); TRANSMEMBRANE (PHOBIUS); TRANSMEMBRANE (PHOBIUS); CYTOPLASMIC_DOMAIN (PHOBIUS); NON_CYTOPLASMIC_DOMAIN (PHOBIUS); IPR001138 (CDD); cd12148 (CDD)	F:GO:0000981; F:GO:0003677; C:GO:0005634; P:GO:0006351; P:GO:0006355; F:GO:0008270	F:DNA-binding transcription factor activity, RNA polymerase II-specific; F:DNA binding; C:nucleus; P:transcription, DNA-templated; P:regulation of transcription, DNA-templated; F:zinc ion binding
maker-Pseudochromosome_1-snap-gene-6.17	probable ATP dependent RNA helicase	1100	0.0	F:GO:0003723; F:GO:0004386; P:GO:0034655; F:GO:0043167	F:RNA binding; F:helicase activity; P:nucleobase-containing compound catabolic process; F:ion binding	EC:3.6.1.15	Nucleoside-triphosphate phosphatase	Coil (COILS); IPR001650 (SMART); IPR014001 (SMART); IPR012961 (SMART); G3DSA:1.10.3380.30 (GENE3D); G3DSA:3.40.50.300 (GENE3D); IPR016438 (PIRSF); IPR012961 (PFAM); IPR011545 (PFAM); G3DSA:3.40.50.300 (GENE3D); IPR025696 (PFAM); G3DSA:2.40.30.300 (GENE3D); G3DSA:1.20.1500.20 (GENE3D); IPR001650 (PFAM); mobidb-lite (MOBIDB_LITE); mobidb-lite (MOBIDB_LITE); mobidb-lite (MOBIDB_LITE); mobidb-lite (M…	F:GO:0003676; F:GO:0003723; F:GO:0003724; F:GO:0005524; P:GO:0006401	F:nucleic acid binding; F:RNA binding; F:RNA helicase activity; F:ATP binding; P:RNA catabolic process
snap_masked-Pseudochromosome_1-processed-gene-12.66	adenylate cyclase	408	0.0	F:GO:0003674	F:molecular_function			SM00365 (SMART); IPR003591 (SMART); IPR032675 (G3DSA:3.80.10.GENE3D); IPR032675 (G3DSA:3.80.10.GENE3D); IPR032675 (G3DSA:3.80.10.GENE3D); IPR025875 (PFAM); IPR001611 (PFAM); mobidb-lite (MOBIDB_LITE); mobidb-lite (MOBIDB_LITE); PTHR44036:SF2 (PANTHER); PTHR44036 (PANTHER); IPR001611 (PROSITE_PROFILES); IPR001611 (PROSITE_PROFILES); IPR001611 (PROSITE_PROFILES); IPR001611 (PROSITE_PROFILES); IPR00…	F:GO:0005515	F:protein binding
genemark-Pseudochromosome_1-processed-gene-8.0	probable cellulase precursor	333	0.0	P:GO:0005975; F:GO:0016798	P:carbohydrate metabolic process; F:hydrolase activity, acting on glycosyl bonds			IPR001547 (PFAM); G3DSA:3.20.20.80 (GENE3D); PTHR34142:SF1 (PANTHER); PTHR34142 (PANTHER); NON_CYTOPLASMIC_DOMAIN (PHOBIUS); SIGNAL_PEPTIDE_H_REGION (PHOBIUS); SIGNAL_PEPTIDE_C_REGION (PHOBIUS); SIGNAL_PEPTIDE_N_REGION (PHOBIUS); SIGNAL_PEPTIDE (PHOBIUS); SignalP-TM (SIGNALP_GRAM_POSITIVE); SignalP-noTM (SIGNALP_EUK); SignalP-noTM (SIGNALP_GRAM_NEGATIVE); IPR017853 (SUPERFAMILY)	F:GO:0004553; P:GO:0005975	F:hydrolase activity, hydrolyzing O-glycosyl compounds; P:carbohydrate metabolic process
maker-Pseudochromosome_1-augustus-gene-2.18	hypothetical protein FOYG_16635	465	0.0					mobidb-lite (MOBIDB_LITE); mobidb-lite (MOBIDB_LITE); mobidb-lite (MOBIDB_LITE); mobidb-lite (MOBIDB_LITE); PTHR38166 (PANTHER)	no GO terms	no GO terms
genemark-Pseudochromosome_1-processed-gene-6.123	uncharacterized protein FMAN_00234	607	0.0	F:GO:0003674	F:molecular_function			IPR002885 (PFAM); IPR002885 (TIGRFAM); IPR011990 (G3DSA:1.25.40.GENE3D); mobidb-lite (MOBIDB_LITE); mobidb-lite (MOBIDB_LITE); PTHR44149 (PANTHER); NON_CYTOPLASMIC_DOMAIN (PHOBIUS); SIGNAL_PEPTIDE_H_REGION (PHOBIUS); SIGNAL_PEPTIDE_N_REGION (PHOBIUS); SIGNAL_PEPTIDE_C_REGION (PHOBIUS); SIGNAL_PEPTIDE (PHOBIUS); IPR002885 (PROSITE_PROFILES); IPR002885 (PROSITE_PROFILES); IPR002885 (PROSITE_PROFILE…	F:GO:0005515	F:protein binding
snap_masked-Pseudochromosome_1-processed-gene-1.66	hypothetical protein FOIG_16468	421	0.0	F:GO:0003700; C:GO:0005634; P:GO:0009058; P:GO:0034641; F:GO:0043167	F:DNA-binding transcription factor activity; C:nucleus; P:biosynthetic process; P:cellular nitrogen compound metabolic process; F:ion binding			IPR001138 (SMART); IPR001138 (PFAM); IPR036864 (G3DSA:4.10.240.GENE3D); mobidb-lite (MOBIDB_LITE); mobidb-lite (MOBIDB_LITE); mobidb-lite (MOBIDB_LITE); PTHR31263:SF4 (PANTHER); PTHR31263 (PANTHER); IPR001138 (PROSITE_PROFILES); IPR001138 (CDD); IPR036864 (SUPERFAMILY)	F:GO:0000981; C:GO:0005634; P:GO:0006355; F:GO:0008270	F:DNA-binding transcription factor activity, RNA polymerase II-specific; C:nucleus; P:regulation of transcription, DNA-templated; F:zinc ion binding
genemark-Pseudochromosome_1-processed-gene-15.66	related to VTC2-putative polyphosphate synthetase	769	0.0	C:GO:0005575	C:cellular_component			Coil (COILS); Coil (COILS); IPR018966 (PFAM); IPR003807 (PFAM); G3DSA:2.40.320.20 (GENE3D); mobidb-lite (MOBIDB_LITE); PTHR10783:SF45 (PANTHER); PTHR10783 (PANTHER); TRANSMEMBRANE (PHOBIUS); CYTOPLASMIC_DOMAIN (PHOBIUS); TRANSMEMBRANE (PHOBIUS); CYTOPLASMIC_DOMAIN (PHOBIUS); NON_CYTOPLASMIC_DOMAIN (PHOBIUS); TRANSMEMBRANE (PHOBIUS); NON_CYTOPLASMIC_DOMAIN (PHOBIUS); IPR004331 (PROSITE_PROFILES); …	no GO terms	no GO terms
snap_masked-Pseudochromosome_1-processed-gene-13.68	Uncharacterized protein LW94_3937	474	1.23104E-164					mobidb-lite (MOBIDB_LITE); mobidb-lite (MOBIDB_LITE); mobidb-lite (MOBIDB_LITE); mobidb-lite (MOBIDB_LITE); mobidb-lite (MOBIDB_LITE); mobidb-lite (MOBIDB_LITE); mobidb-lite (MOBIDB_LITE); SIGNAL_PEPTIDE_N_REGION (PHOBIUS); SIGNAL_PEPTIDE_H_REGION (PHOBIUS); NON_CYTOPLASMIC_DOMAIN (PHOBIUS); SIGNAL_PEPTIDE (PHOBIUS); SIGNAL_PEPTIDE_C_REGION (PHOBIUS); SignalP-noTM (SIGNALP_GRAM_NEGATIVE); SignalP…	no GO terms	no GO terms
snap_masked-Pseudochromosome_1-processed-gene-7.48	hypothetical protein FOZG_00315	401	0.0	C:GO:0005575	C:cellular_component			mobidb-lite (MOBIDB_LITE); mobidb-lite (MOBIDB_LITE); mobidb-lite (MOBIDB_LITE); mobidb-lite (MOBIDB_LITE); mobidb-lite (MOBIDB_LITE); mobidb-lite (MOBIDB_LITE); NON_CYTOPLASMIC_DOMAIN (PHOBIUS); TRANSMEMBRANE (PHOBIUS); CYTOPLASMIC_DOMAIN (PHOBIUS); TMhelix (TMHMM)	no GO terms	no GO terms
genemark-Pseudochromosome_1-processed-gene-4.34	hypothetical protein FOC4_g10007480	114	7.01451E-47					no IPS match	no IPS match	no IPS match
genemark-Pseudochromosome_1-processed-gene-2.118	methylisocitrate lyase	348	0.0	F:GO:0016829	F:lyase activity			PF13714 (PFAM); IPR040442 (G3DSA:3.20.20.GENE3D); mobidb-lite (MOBIDB_LITE); PTHR42905:SF2 (PANTHER); PTHR42905 (PANTHER); IPR039556 (CDD); IPR015813 (SUPERFAMILY)	F:GO:0003824	F:catalytic activity
genemark-Pseudochromosome_1-processed-gene-7.36	hypothetical protein FNYG_08870	266	1.26819E-155					mobidb-lite (MOBIDB_LITE); mobidb-lite (MOBIDB_LITE)	no GO terms	no GO terms
genemark-Pseudochromosome_1-processed-gene-0.30	DUF341 domain-containing protein	175	1.25141E-122	F:GO:0016491; F:GO:0043167	F:oxidoreductase activity; F:ion binding			IPR005645 (PFAM); IPR029058 (G3DSA:3.40.50.GENE3D); PTHR22778 (PANTHER); PTHR22778:SF0 (PANTHER); IPR029058 (SUPERFAMILY)	no GO terms	no GO terms
snap_masked-Pseudochromosome_1-processed-gene-3.48	uncharacterized protein FFMR_00097	188	1.9263E-124					no IPS match	no IPS match	no IPS match
genemark-Pseudochromosome_1-processed-gene-12.30	CAMK/CAMKL/CHK1 protein kinase	531	0.0	P:GO:0000003; C:GO:0000228; P:GO:0000278; C:GO:0005737; P:GO:0006259; P:GO:0006464; P:GO:0006950; P:GO:0007165; P:GO:0009058; F:GO:0016301; F:GO:0043167	P:reproduction; C:nuclear chromosome; P:mitotic cell cycle; C:cytoplasm; P:DNA metabolic process; P:cellular protein modification process; P:response to stress; P:signal transduction; P:biosynthetic process; F:kinase activity; F:ion binding	EC:2.7.11	Transferring phosphorus-containing groups	IPR000719 (SMART); G3DSA:1.10.510.10 (GENE3D); IPR000719 (PFAM); mobidb-lite (MOBIDB_LITE); PTHR45524 (PANTHER); IPR000719 (PROSITE_PROFILES); IPR011009 (SUPERFAMILY)	F:GO:0004672; F:GO:0005524; P:GO:0006468	F:protein kinase activity; F:ATP binding; P:protein phosphorylation
snap_masked-Pseudochromosome_1-processed-gene-1.88	alpha/beta hydrolase fold protein	107	9.62196E-53	F:GO:0003674	F:molecular_function			IPR029058 (G3DSA:3.40.50.GENE3D); IPR029058 (SUPERFAMILY)	no GO terms	no GO terms
genemark-Pseudochromosome_1-processed-gene-8.31	Ca2+:H+ antiporter	1114	0.0	C:GO:0005575; P:GO:0055085	C:cellular_component; P:transmembrane transport			IPR005185 (PFAM); IPR004837 (PFAM); mobidb-lite (MOBIDB_LITE); mobidb-lite (MOBIDB_LITE); mobidb-lite (MOBIDB_LITE); mobidb-lite (MOBIDB_LITE); mobidb-lite (MOBIDB_LITE); mobidb-lite (MOBIDB_LITE); mobidb-lite (MOBIDB_LITE); mobidb-lite (MOBIDB_LITE); mobidb-lite (MOBIDB_LITE); mobidb-lite (MOBIDB_LITE); mobidb-lite (MOBIDB_LITE); mobidb-lite (MOBIDB_LITE); mobidb-lite (MOBIDB_LITE); PTHR31503:SF…	C:GO:0016021; P:GO:0055085	C:integral component of membrane; P:transmembrane transport
augustus_masked-Pseudochromosome_1-processed-gene-15.26	uncharacterized protein LW93_11600	1046	0.0	F:GO:0003674; C:GO:0005622; P:GO:0007165; C:GO:0032991	F:molecular_function; C:intracellular; P:signal transduction; C:protein-containing complex			IPR001680 (SMART); IPR015943 (G3DSA:2.130.10.GENE3D); IPR001680 (PFAM); mobidb-lite (MOBIDB_LITE); mobidb-lite (MOBIDB_LITE); mobidb-lite (MOBIDB_LITE); mobidb-lite (MOBIDB_LITE); mobidb-lite (MOBIDB_LITE); mobidb-lite (MOBIDB_LITE); mobidb-lite (MOBIDB_LITE); IPR037588 (PANTHER); PTHR19842:SF2 (PANTHER); IPR001680 (PROSITE_PROFILES); IPR017986 (PROSITE_PROFILES); IPR036322 (SUPERFAMILY)	F:GO:0005515; P:GO:0031929; C:GO:0031931; C:GO:0031932; P:GO:0032008	F:protein binding; P:TOR signaling; C:TORC1 complex; C:TORC2 complex; P:positive regulation of TOR signaling
maker-Pseudochromosome_1-snap-gene-14.82	Telomeric DNA-binding factor trf1	925	0.0	F:GO:0003677	F:DNA binding			IPR001005 (SMART); IPR013867 (PFAM); G3DSA:1.10.10.60 (GENE3D); mobidb-lite (MOBIDB_LITE); mobidb-lite (MOBIDB_LITE); mobidb-lite (MOBIDB_LITE); mobidb-lite (MOBIDB_LITE); mobidb-lite (MOBIDB_LITE); mobidb-lite (MOBIDB_LITE); mobidb-lite (MOBIDB_LITE); mobidb-lite (MOBIDB_LITE); mobidb-lite (MOBIDB_LITE); mobidb-lite (MOBIDB_LITE); mobidb-lite (MOBIDB_LITE); PTHR21717 (PANTHER); PTHR21717:SF51 (P…	F:GO:0003677; F:GO:0042162; F:GO:0042803	F:DNA binding; F:telomeric DNA binding; F:protein homodimerization activity
snap_masked-Pseudochromosome_1-processed-gene-14.29	-No description-	61						mobidb-lite (MOBIDB_LITE)	no GO terms	no GO terms
snap_masked-Pseudochromosome_1-processed-gene-3.54	hypothetical protein FVER14953_20637	274	5.05441E-170					mobidb-lite (MOBIDB_LITE); mobidb-lite (MOBIDB_LITE); mobidb-lite (MOBIDB_LITE)	no GO terms	no GO terms
genemark-Pseudochromosome_1-processed-gene-14.11	uncharacterized protein FPRN_00457	190	7.66482E-133					PTHR39219 (PANTHER); CYTOPLASMIC_DOMAIN (PHOBIUS); SIGNAL_PEPTIDE (PHOBIUS); SIGNAL_PEPTIDE_C_REGION (PHOBIUS); TRANSMEMBRANE (PHOBIUS); NON_CYTOPLASMIC_DOMAIN (PHOBIUS); SIGNAL_PEPTIDE_H_REGION (PHOBIUS); SIGNAL_PEPTIDE_N_REGION (PHOBIUS); SignalP-noTM (SIGNALP_EUK)	no GO terms	no GO terms
genemark-Pseudochromosome_1-processed-gene-15.72	citrate synthase, mitochondrial	470	0.0	P:GO:0006091; F:GO:0016746; P:GO:0044281	P:generation of precursor metabolites and energy; F:transferase activity, transferring acyl groups; P:small molecule metabolic process	EC:2.3.3.1	Citrate (Si)-synthase	IPR002020 (PRINTS); IPR016142 (G3DSA:1.10.580.GENE3D); IPR016143 (G3DSA:1.10.230.GENE3D); IPR002020 (PFAM); IPR010109 (TIGRFAM); PTHR11739:SF15 (PANTHER); IPR002020 (PANTHER); cd06105 (CDD); IPR036969 (SUPERFAMILY)	F:GO:0004108; P:GO:0006101; F:GO:0046912	F:citrate (Si)-synthase activity; P:citrate metabolic process; F:transferase activity, transferring acyl groups, acyl groups converted into alkyl on transfer
augustus_masked-Pseudochromosome_1-processed-gene-2.64	hypothetical protein FVER14953_09896	215	4.59261E-119					TRANSMEMBRANE (PHOBIUS); NON_CYTOPLASMIC_DOMAIN (PHOBIUS); CYTOPLASMIC_DOMAIN (PHOBIUS)	no GO terms	no GO terms
snap_masked-Pseudochromosome_1-processed-gene-5.63	-No description-	203						mobidb-lite (MOBIDB_LITE); mobidb-lite (MOBIDB_LITE)	no GO terms	no GO terms
maker-Pseudochromosome_1-snap-gene-13.87	hypothetical protein FOXB_06149	659	0.0	F:GO:0016491	F:oxidoreductase activity			IPR002347 (PRINTS); IPR002347 (PRINTS); PF13561 (PFAM); G3DSA:3.40.50.720 (GENE3D); PTHR43180:SF24 (PANTHER); PTHR43180 (PANTHER); cd05233 (CDD); IPR036291 (SUPERFAMILY)	no GO terms	no GO terms
snap_masked-Pseudochromosome_1-processed-gene-8.71	related to IQ calmodulin-binding motif domain protein	1012	0.0					Coil (COILS); IPR008862 (PFAM); mobidb-lite (MOBIDB_LITE); mobidb-lite (MOBIDB_LITE); mobidb-lite (MOBIDB_LITE); mobidb-lite (MOBIDB_LITE); mobidb-lite (MOBIDB_LITE); mobidb-lite (MOBIDB_LITE); mobidb-lite (MOBIDB_LITE); PTHR12832:SF18 (PANTHER); IPR008862 (PANTHER)	no GO terms	no GO terms
genemark-Pseudochromosome_1-processed-gene-7.17	related to enoyl-CoA hydratase/isomerase	274	0.0	F:GO:0016853	F:isomerase activity			G3DSA:3.90.226.10 (GENE3D); IPR001753 (PFAM); PTHR11941:SF75 (PANTHER); PTHR11941 (PANTHER); cd06558 (CDD); IPR029045 (SUPERFAMILY)	F:GO:0003824	F:catalytic activity
augustus_masked-Pseudochromosome_1-processed-gene-8.49	hypothetical protein FNYG_08895	898	0.0					no IPS match	no IPS match	no IPS match
genemark-Pseudochromosome_1-processed-gene-12.18	predicted protein [	287	0.0	F:GO:0003674	F:molecular_function			IPR000210 (PFAM); mobidb-lite (MOBIDB_LITE); mobidb-lite (MOBIDB_LITE); mobidb-lite (MOBIDB_LITE); PTHR26379:SF222 (PANTHER); PTHR26379 (PANTHER); IPR000210 (PROSITE_PROFILES); SignalP-TM (SIGNALP_GRAM_POSITIVE); IPR011333 (SUPERFAMILY)	F:GO:0005515	F:protein binding
maker-Pseudochromosome_1-snap-gene-2.5	putative arylsulfatase	122	5.26256E-64	F:GO:0003674; P:GO:0008150	F:molecular_function; P:biological_process	EC:3.1.6.1	Arylsulfatase	PTHR43108 (PANTHER); PTHR43108:SF8 (PANTHER)	no GO terms	no GO terms
snap_masked-Pseudochromosome_1-processed-gene-15.49	Palmitoyltransferase PFA4	429	0.0	C:GO:0005737; C:GO:0005783; P:GO:0006464; P:GO:0009058; F:GO:0016746	C:cytoplasm; C:endoplasmic reticulum; P:cellular protein modification process; P:biosynthetic process; F:transferase activity, transferring acyl groups	EC:2.3.1.225	Protein S-acyltransferase	IPR001594 (PFAM); mobidb-lite (MOBIDB_LITE); PTHR22883:SF117 (PANTHER); PTHR22883 (PANTHER); TRANSMEMBRANE (PHOBIUS); TRANSMEMBRANE (PHOBIUS); CYTOPLASMIC_DOMAIN (PHOBIUS); CYTOPLASMIC_DOMAIN (PHOBIUS); TRANSMEMBRANE (PHOBIUS); TRANSMEMBRANE (PHOBIUS); NON_CYTOPLASMIC_DOMAIN (PHOBIUS); NON_CYTOPLASMIC_DOMAIN (PHOBIUS); CYTOPLASMIC_DOMAIN (PHOBIUS); IPR033682 (HAMAP); PS50216 (PROSITE_PROFILES); T…	C:GO:0005789; F:GO:0019706	C:endoplasmic reticulum membrane; F:protein-cysteine S-palmitoyltransferase activity
genemark-Pseudochromosome_1-processed-gene-11.94	uncharacterized protein FPRN_00365	118	3.44263E-37					Coil (COILS); mobidb-lite (MOBIDB_LITE); mobidb-lite (MOBIDB_LITE)	no GO terms	no GO terms
maker-Pseudochromosome_1-augustus-gene-13.104	uncharacterized protein FMAN_00418	553	0.0					mobidb-lite (MOBIDB_LITE); mobidb-lite (MOBIDB_LITE); mobidb-lite (MOBIDB_LITE); PTHR38166 (PANTHER)	no GO terms	no GO terms
maker-Pseudochromosome_1-snap-gene-6.10	predicted protein [	287	3.57195E-72					mobidb-lite (MOBIDB_LITE); mobidb-lite (MOBIDB_LITE)	no GO terms	no GO terms
genemark-Pseudochromosome_1-processed-gene-1.48	uncharacterized protein FMAN_00040	3007	0.0					Coil (COILS); Coil (COILS); Coil (COILS); Coil (COILS); IPR022099 (PFAM); IPR022105 (PFAM); mobidb-lite (MOBIDB_LITE); mobidb-lite (MOBIDB_LITE); mobidb-lite (MOBIDB_LITE); mobidb-lite (MOBIDB_LITE); PTHR13367:SF18 (PANTHER); PTHR13367:SF18 (PANTHER); PTHR13367 (PANTHER); PTHR13367 (PANTHER); IPR027417 (SUPERFAMILY)	no GO terms	no GO terms
snap_masked-Pseudochromosome_1-processed-gene-4.120	-No description-	107						no IPS match	no IPS match	no IPS match
genemark-Pseudochromosome_1-processed-gene-6.101	protein NMT1	342	0.0	P:GO:0006790; P:GO:0009058; P:GO:0034641; P:GO:0044281	P:sulfur compound metabolic process; P:biosynthetic process; P:cellular nitrogen compound metabolic process; P:small molecule metabolic process			IPR015168 (PFAM); G3DSA:3.40.190.10 (GENE3D); G3DSA:3.40.190.10 (GENE3D); IPR027939 (PANTHER); PTHR31528:SF1 (PANTHER); cd13650 (CDD); SSF53850 (SUPERFAMILY)	P:GO:0009228	P:thiamine biosynthetic process
snap_masked-Pseudochromosome_1-processed-gene-5.82	-No description-	59						no IPS match	no IPS match	no IPS match
genemark-Pseudochromosome_1-processed-gene-2.87	acetyltransferase	232	3.75189E-168	F:GO:0016746	F:transferase activity, transferring acyl groups			IPR024688 (SMART); G3DSA:2.160.10.10 (GENE3D); IPR024688 (PFAM); IPR001451 (PFAM); PTHR23416 (PANTHER); cd03357 (CDD); IPR011004 (SUPERFAMILY)	F:GO:0016407	F:acetyltransferase activity
genemark-Pseudochromosome_1-processed-gene-12.27	related to RMD1-protein required for meiotic division	633	0.0	C:GO:0005575	C:cellular_component			IPR003734 (PFAM); mobidb-lite (MOBIDB_LITE); mobidb-lite (MOBIDB_LITE); mobidb-lite (MOBIDB_LITE); mobidb-lite (MOBIDB_LITE); PTHR16255:SF4 (PANTHER); PTHR16255 (PANTHER); CYTOPLASMIC_DOMAIN (PHOBIUS); TRANSMEMBRANE (PHOBIUS); NON_CYTOPLASMIC_DOMAIN (PHOBIUS); TMhelix (TMHMM)	no GO terms	no GO terms
genemark-Pseudochromosome_1-processed-gene-4.56	related to delta-5/delta-6 fatty acid desaturase	521	0.0	C:GO:0005575; P:GO:0006629; F:GO:0016491	C:cellular_component; P:lipid metabolic process; F:oxidoreductase activity			IPR036400 (G3DSA:3.10.120.GENE3D); IPR012171 (PIRSF); IPR001199 (PFAM); IPR005804 (PFAM); mobidb-lite (MOBIDB_LITE); mobidb-lite (MOBIDB_LITE); mobidb-lite (MOBIDB_LITE); PTHR19353 (PANTHER); PTHR19353:SF30 (PANTHER); CYTOPLASMIC_DOMAIN (PHOBIUS); TRANSMEMBRANE (PHOBIUS); TRANSMEMBRANE (PHOBIUS); NON_CYTOPLASMIC_DOMAIN (PHOBIUS); NON_CYTOPLASMIC_DOMAIN (PHOBIUS); CYTOPLASMIC_DOMAIN (PHOBIUS); TRA…	P:GO:0006629; C:GO:0016021; F:GO:0016491	P:lipid metabolic process; C:integral component of membrane; F:oxidoreductase activity
maker-Pseudochromosome_1-snap-gene-13.96	uncharacterized protein FMAN_00450	460	0.0					mobidb-lite (MOBIDB_LITE); mobidb-lite (MOBIDB_LITE)	no GO terms	no GO terms
genemark-Pseudochromosome_1-processed-gene-15.85	er membrane protein complex subunit	242	1.11555E-175	C:GO:0005575	C:cellular_component			IPR019008 (PFAM); mobidb-lite (MOBIDB_LITE); mobidb-lite (MOBIDB_LITE); mobidb-lite (MOBIDB_LITE); IPR039163 (PANTHER); PTHR13605:SF4 (PANTHER); SIGNAL_PEPTIDE_N_REGION (PHOBIUS); CYTOPLASMIC_DOMAIN (PHOBIUS); SIGNAL_PEPTIDE_H_REGION (PHOBIUS); SIGNAL_PEPTIDE (PHOBIUS); NON_CYTOPLASMIC_DOMAIN (PHOBIUS); SIGNAL_PEPTIDE_C_REGION (PHOBIUS); TRANSMEMBRANE (PHOBIUS); SignalP-noTM (SIGNALP_EUK); Signal…	no GO terms	no GO terms
snap_masked-Pseudochromosome_1-processed-gene-5.54	related to amidohydrolase family protein	537	0.0	F:GO:0016810	F:hydrolase activity, acting on carbon-nitrogen (but not peptide) bonds			IPR011059 (G3DSA:2.30.40.GENE3D); G3DSA:3.10.310.70 (GENE3D); G3DSA:3.20.20.140 (GENE3D); IPR013108 (PFAM); PTHR22642 (PANTHER); PTHR22642:SF4 (PANTHER); IPR033932 (CDD); IPR011059 (SUPERFAMILY); IPR032466 (SUPERFAMILY)	F:GO:0016810	F:hydrolase activity, acting on carbon-nitrogen (but not peptide) bonds
snap_masked-Pseudochromosome_1-processed-gene-0.6	probable mfs-multidrug-resistance transporter	395	0.0	C:GO:0005575; P:GO:0055085	C:cellular_component; P:transmembrane transport			Coil (COILS); IPR011701 (PFAM); PTHR23502:SF132 (PANTHER); PTHR23502 (PANTHER); TRANSMEMBRANE (PHOBIUS); TRANSMEMBRANE (PHOBIUS); TRANSMEMBRANE (PHOBIUS); CYTOPLASMIC_DOMAIN (PHOBIUS); NON_CYTOPLASMIC_DOMAIN (PHOBIUS); NON_CYTOPLASMIC_DOMAIN (PHOBIUS); CYTOPLASMIC_DOMAIN (PHOBIUS); TRANSMEMBRANE (PHOBIUS); CYTOPLASMIC_DOMAIN (PHOBIUS); TRANSMEMBRANE (PHOBIUS); NON_CYTOPLASMIC_DOMAIN (PHOBIUS); TR…	C:GO:0016021; P:GO:0055085	C:integral component of membrane; P:transmembrane transport
genemark-Pseudochromosome_1-processed-gene-14.24	related to putative plasma membrane protein YRO2	293	0.0	C:GO:0005575; F:GO:0022857	C:cellular_component; F:transmembrane transporter activity			IPR001425 (SMART); IPR001425 (PFAM); G3DSA:1.20.1070.10 (GENE3D); PTHR28286:SF1 (PANTHER); IPR001425 (PANTHER); TRANSMEMBRANE (PHOBIUS); TRANSMEMBRANE (PHOBIUS); NON_CYTOPLASMIC_DOMAIN (PHOBIUS); NON_CYTOPLASMIC_DOMAIN (PHOBIUS); NON_CYTOPLASMIC_DOMAIN (PHOBIUS); CYTOPLASMIC_DOMAIN (PHOBIUS); CYTOPLASMIC_DOMAIN (PHOBIUS); TRANSMEMBRANE (PHOBIUS); NON_CYTOPLASMIC_DOMAIN (PHOBIUS); TRANSMEMBRANE (P…	F:GO:0005216; P:GO:0006811; C:GO:0016020	F:ion channel activity; P:ion transport; C:membrane
snap_masked-Pseudochromosome_1-processed-gene-13.77	tRNA wybutosine-synthesizing protein 2	378	0.0	C:GO:0005737; P:GO:0006399; F:GO:0008168; P:GO:0009058	C:cytoplasm; P:tRNA metabolic process; F:methyltransferase activity; P:biosynthetic process			IPR026274 (PIRSF); G3DSA:3.40.50.150 (GENE3D); IPR030382 (PFAM); PTHR23245:SF25 (PANTHER); PTHR23245 (PANTHER); IPR030382 (PROSITE_PROFILES); IPR029063 (SUPERFAMILY)	F:GO:0008757; P:GO:0031591	F:S-adenosylmethionine-dependent methyltransferase activity; P:wybutosine biosynthetic process
genemark-Pseudochromosome_1-processed-gene-9.20	MFS transporter, FHS family, L-fucose permease	465	0.0	C:GO:0005575; P:GO:0055085	C:cellular_component; P:transmembrane transport			G3DSA:1.20.1250.20 (GENE3D); G3DSA:1.20.1250.20 (GENE3D); IPR011701 (PFAM); PTHR43702 (PANTHER); PTHR43702:SF5 (PANTHER); TRANSMEMBRANE (PHOBIUS); CYTOPLASMIC_DOMAIN (PHOBIUS); CYTOPLASMIC_DOMAIN (PHOBIUS); TRANSMEMBRANE (PHOBIUS); TRANSMEMBRANE (PHOBIUS); NON_CYTOPLASMIC_DOMAIN (PHOBIUS); NON_CYTOPLASMIC_DOMAIN (PHOBIUS); CYTOPLASMIC_DOMAIN (PHOBIUS); TRANSMEMBRANE (PHOBIUS); NON_CYTOPLASMIC_DOM…	C:GO:0016021; P:GO:0055085	C:integral component of membrane; P:transmembrane transport
snap_masked-Pseudochromosome_1-processed-gene-6.65	related to RSM25-mitochondrial ribosomal protein, small subunit	265	7.74508E-176	F:GO:0003735; C:GO:0005739; C:GO:0005840	F:structural constituent of ribosome; C:mitochondrion; C:ribosome			IPR016939 (PFAM); mobidb-lite (MOBIDB_LITE); mobidb-lite (MOBIDB_LITE); mobidb-lite (MOBIDB_LITE); IPR016939 (PANTHER)	F:GO:0003735; C:GO:0005763	F:structural constituent of ribosome; C:mitochondrial small ribosomal subunit
snap_masked-Pseudochromosome_1-processed-gene-13.49	related to thiosulfate sulfurtransferases	319	0.0	F:GO:0003674	F:molecular_function			IPR001763 (SMART); IPR001763 (PFAM); IPR036873 (G3DSA:3.40.250.GENE3D); IPR036873 (G3DSA:3.40.250.GENE3D); mobidb-lite (MOBIDB_LITE); PTHR11364:SF13 (PANTHER); PTHR11364 (PANTHER); IPR001763 (PROSITE_PROFILES); IPR001763 (PROSITE_PROFILES); cd01448 (CDD); cd01449 (CDD); IPR036873 (SUPERFAMILY); IPR036873 (SUPERFAMILY)	no GO terms	no GO terms
genemark-Pseudochromosome_1-processed-gene-1.60	uncharacterized protein FMAN_00077	263	2.20137E-157					Coil (COILS); mobidb-lite (MOBIDB_LITE); mobidb-lite (MOBIDB_LITE); mobidb-lite (MOBIDB_LITE); mobidb-lite (MOBIDB_LITE); SIGNAL_PEPTIDE_H_REGION (PHOBIUS); SIGNAL_PEPTIDE (PHOBIUS); SIGNAL_PEPTIDE_C_REGION (PHOBIUS); SIGNAL_PEPTIDE_N_REGION (PHOBIUS); NON_CYTOPLASMIC_DOMAIN (PHOBIUS); SignalP-noTM (SIGNALP_EUK); SignalP-noTM (SIGNALP_GRAM_NEGATIVE)	no GO terms	no GO terms
genemark-Pseudochromosome_1-processed-gene-10.11	uncharacterized protein FMAN_00323	755	0.0	F:GO:0003674	F:molecular_function			IPR001611 (PFAM); SSF52047 (SUPERFAMILY)	F:GO:0005515	F:protein binding
genemark-Pseudochromosome_1-processed-gene-5.17	uncharacterized protein FFUJ_01917	190	1.48312E-131					IPR011058 (SMART); IPR011058 (PFAM); IPR036673 (G3DSA:2.30.60.GENE3D); SIGNAL_PEPTIDE (PHOBIUS); SIGNAL_PEPTIDE_H_REGION (PHOBIUS); SIGNAL_PEPTIDE_N_REGION (PHOBIUS); NON_CYTOPLASMIC_DOMAIN (PHOBIUS); SIGNAL_PEPTIDE_C_REGION (PHOBIUS); SignalP-noTM (SIGNALP_GRAM_NEGATIVE); SignalP-noTM (SIGNALP_EUK); SignalP-TM (SIGNALP_GRAM_POSITIVE); IPR036673 (SUPERFAMILY)	no GO terms	no GO terms
genemark-Pseudochromosome_1-processed-gene-1.26	putative matrix metalloproteinase-11 protein	198	4.7733E-135	F:GO:0008233; C:GO:0031012; F:GO:0043167	F:peptidase activity; C:extracellular matrix; F:ion binding	EC:3.4.24	Acting on peptide bonds (peptidases)	IPR024653 (PFAM); IPR024079 (G3DSA:3.40.390.GENE3D); cd04279 (CDD); SSF55486 (SUPERFAMILY)	F:GO:0008237	F:metallopeptidase activity
maker-Pseudochromosome_1-augustus-gene-6.4	double-strand break repair protein MRE11	728	0.0	P:GO:0000003; C:GO:0000228; P:GO:0000278; F:GO:0004518; P:GO:0006259; P:GO:0006950; C:GO:0032991; P:GO:0042592; F:GO:0043167; P:GO:0051276	P:reproduction; C:nuclear chromosome; P:mitotic cell cycle; F:nuclease activity; P:DNA metabolic process; P:response to stress; C:protein-containing complex; P:homeostatic process; F:ion binding; P:chromosome organization			Coil (COILS); Coil (COILS); IPR007281 (SMART); IPR003701 (PIRSF); IPR004843 (PFAM); IPR038487 (G3DSA:3.30.110.GENE3D); IPR003701 (TIGRFAM); IPR029052 (G3DSA:3.60.21.GENE3D); IPR007281 (PFAM); mobidb-lite (MOBIDB_LITE); mobidb-lite (MOBIDB_LITE); PTHR10139 (PANTHER); cd00840 (CDD); SSF56300 (SUPERFAMILY)	F:GO:0004519; C:GO:0005634; P:GO:0006302; F:GO:0008408; F:GO:0016787; F:GO:0030145; C:GO:0030870	F:endonuclease activity; C:nucleus; P:double-strand break repair; F:3'-5' exonuclease activity; F:hydrolase activity; F:manganese ion binding; C:Mre11 complex
genemark-Pseudochromosome_1-processed-gene-5.0	uncharacterized protein FMAN_00167	89	1.40005E-52					mobidb-lite (MOBIDB_LITE); mobidb-lite (MOBIDB_LITE); mobidb-lite (MOBIDB_LITE)	no GO terms	no GO terms
genemark-Pseudochromosome_1-processed-gene-11.88	kinetochore protein SPC25	257	0.0	C:GO:0005634; C:GO:0005694; P:GO:0007049; C:GO:0032991; P:GO:0051301	C:nucleus; C:chromosome; P:cell cycle; C:protein-containing complex; P:cell division			Coil (COILS); Coil (COILS); IPR013255 (PFAM); G3DSA:3.30.457.50 (GENE3D); PTHR14281:SF0 (PANTHER); PTHR14281 (PANTHER)	no GO terms	no GO terms
snap_masked-Pseudochromosome_1-processed-gene-14.50	Required for respiratory growth protein 9, mitochondrial	372	0.0					IPR010487 (PFAM); mobidb-lite (MOBIDB_LITE); mobidb-lite (MOBIDB_LITE); mobidb-lite (MOBIDB_LITE); mobidb-lite (MOBIDB_LITE); mobidb-lite (MOBIDB_LITE); mobidb-lite (MOBIDB_LITE); mobidb-lite (MOBIDB_LITE); mobidb-lite (MOBIDB_LITE); IPR010487 (PANTHER)	no GO terms	no GO terms
genemark-Pseudochromosome_1-processed-gene-1.32	putative MFS-type transporter	535	0.0	C:GO:0005575; P:GO:0055085	C:cellular_component; P:transmembrane transport			G3DSA:1.20.1250.20 (GENE3D); IPR011701 (PFAM); PTHR23502 (PANTHER); PTHR23502:SF34 (PANTHER); TRANSMEMBRANE (PHOBIUS); CYTOPLASMIC_DOMAIN (PHOBIUS); TRANSMEMBRANE (PHOBIUS); TRANSMEMBRANE (PHOBIUS); CYTOPLASMIC_DOMAIN (PHOBIUS); CYTOPLASMIC_DOMAIN (PHOBIUS); TRANSMEMBRANE (PHOBIUS); TRANSMEMBRANE (PHOBIUS); NON_CYTOPLASMIC_DOMAIN (PHOBIUS); NON_CYTOPLASMIC_DOMAIN (PHOBIUS); TRANSMEMBRANE (PHOBIUS…	C:GO:0016021; P:GO:0055085	C:integral component of membrane; P:transmembrane transport
maker-Pseudochromosome_1-augustus-gene-11.15	related to bZIP transcription factor	570	0.0	F:GO:0003700; P:GO:0009058; P:GO:0034641	F:DNA-binding transcription factor activity; P:biosynthetic process; P:cellular nitrogen compound metabolic process			Coil (COILS); Coil (COILS); IPR004827 (SMART); G3DSA:1.20.5.170 (GENE3D); IPR004827 (PFAM); mobidb-lite (MOBIDB_LITE); mobidb-lite (MOBIDB_LITE); mobidb-lite (MOBIDB_LITE); mobidb-lite (MOBIDB_LITE); mobidb-lite (MOBIDB_LITE); mobidb-lite (MOBIDB_LITE); mobidb-lite (MOBIDB_LITE); mobidb-lite (MOBIDB_LITE); PTHR22952 (PANTHER); PTHR22952:SF344 (PANTHER); IPR004827 (PROSITE_PROFILES); cd14810 (CDD)…	F:GO:0003700; P:GO:0006355	F:DNA-binding transcription factor activity; P:regulation of transcription, DNA-templated
snap_masked-Pseudochromosome_1-processed-gene-12.68	uncharacterized protein FFUJ_01726	706	0.0	F:GO:0003677; F:GO:0003700; C:GO:0005634; P:GO:0009058; P:GO:0034641; F:GO:0043167	F:DNA binding; F:DNA-binding transcription factor activity; C:nucleus; P:biosynthetic process; P:cellular nitrogen compound metabolic process; F:ion binding			IPR001138 (SMART); IPR007219 (SMART); IPR001138 (PFAM); IPR036864 (G3DSA:4.10.240.GENE3D); IPR007219 (PFAM); mobidb-lite (MOBIDB_LITE); mobidb-lite (MOBIDB_LITE); PTHR45582 (PANTHER); IPR001138 (PROSITE_PROFILES); IPR001138 (CDD); cd12148 (CDD); IPR036864 (SUPERFAMILY)	F:GO:0000981; F:GO:0003677; C:GO:0005634; P:GO:0006351; P:GO:0006355; F:GO:0008270	F:DNA-binding transcription factor activity, RNA polymerase II-specific; F:DNA binding; C:nucleus; P:transcription, DNA-templated; P:regulation of transcription, DNA-templated; F:zinc ion binding
snap_masked-Pseudochromosome_1-processed-gene-8.74	hypothetical protein FNYG_08879	158	3.33804E-13					mobidb-lite (MOBIDB_LITE)	no GO terms	no GO terms
genemark-Pseudochromosome_1-processed-gene-4.32	uncharacterized protein FPRO_00170	264	1.58359E-165	P:GO:0006464; F:GO:0016301; F:GO:0043167	P:cellular protein modification process; F:kinase activity; F:ion binding			no IPS match	no IPS match	no IPS match
snap_masked-Pseudochromosome_1-processed-gene-3.64	uncharacterized protein FMAN_00125	413	0.0					mobidb-lite (MOBIDB_LITE)	no GO terms	no GO terms
maker-Pseudochromosome_1-snap-gene-11.4	uncharacterized protein FFB14_11773	126	6.22911E-14					SIGNAL_PEPTIDE_N_REGION (PHOBIUS); SIGNAL_PEPTIDE_C_REGION (PHOBIUS); SIGNAL_PEPTIDE_H_REGION (PHOBIUS); SIGNAL_PEPTIDE (PHOBIUS); NON_CYTOPLASMIC_DOMAIN (PHOBIUS); SignalP-noTM (SIGNALP_EUK)	no GO terms	no GO terms
snap_masked-Pseudochromosome_1-processed-gene-5.57	uncharacterized protein FFB14_11590	146	2.54751E-86					no IPS match	no IPS match	no IPS match
genemark-Pseudochromosome_1-processed-gene-10.20	glutamate decarboxylase	605	0.0	P:GO:0006520; F:GO:0016829; F:GO:0043167	P:cellular amino acid metabolic process; F:lyase activity; F:ion binding	EC:4.1.1.15	Glutamate decarboxylase	IPR015421 (G3DSA:3.40.640.GENE3D); IPR002129 (PFAM); G3DSA:3.90.1150.160 (GENE3D); IPR010107 (TIGRFAM); mobidb-lite (MOBIDB_LITE); mobidb-lite (MOBIDB_LITE); mobidb-lite (MOBIDB_LITE); mobidb-lite (MOBIDB_LITE); mobidb-lite (MOBIDB_LITE); IPR010107 (PANTHER); PTHR43321:SF6 (PANTHER); PTHR43321:SF6 (PANTHER); IPR015424 (SUPERFAMILY)	F:GO:0003824; F:GO:0004351; P:GO:0006536; F:GO:0016831; P:GO:0019752; F:GO:0030170	F:catalytic activity; F:glutamate decarboxylase activity; P:glutamate metabolic process; F:carboxy-lyase activity; P:carboxylic acid metabolic process; F:pyridoxal phosphate binding
genemark-Pseudochromosome_1-processed-gene-15.82	related to RNA binding protein NRD1 protein	671	0.0	F:GO:0003723; P:GO:0006397; P:GO:0009058; F:GO:0019899	F:RNA binding; P:mRNA processing; P:biosynthetic process; F:enzyme binding			IPR000504 (SMART); IPR006569 (SMART); IPR012677 (G3DSA:3.30.70.GENE3D); IPR000504 (PFAM); IPR006903 (PFAM); IPR008942 (G3DSA:1.25.40.GENE3D); mobidb-lite (MOBIDB_LITE); mobidb-lite (MOBIDB_LITE); mobidb-lite (MOBIDB_LITE); mobidb-lite (MOBIDB_LITE); mobidb-lite (MOBIDB_LITE); mobidb-lite (MOBIDB_LITE); mobidb-lite (MOBIDB_LITE); mobidb-lite (MOBIDB_LITE); mobidb-lite (MOBIDB_LITE); PTHR23189:SF41…	F:GO:0003676	F:nucleic acid binding
genemark-Pseudochromosome_1-processed-gene-9.31	hypothetical protein FOXG_11126	410	0.0	F:GO:0003674; C:GO:0005654; P:GO:0009058; C:GO:0032991; P:GO:0034641	F:molecular_function; C:nucleoplasm; P:biosynthetic process; C:protein-containing complex; P:cellular nitrogen compound metabolic process			mobidb-lite (MOBIDB_LITE); mobidb-lite (MOBIDB_LITE); mobidb-lite (MOBIDB_LITE); mobidb-lite (MOBIDB_LITE); CYTOPLASMIC_DOMAIN (PHOBIUS); NON_CYTOPLASMIC_DOMAIN (PHOBIUS); TRANSMEMBRANE (PHOBIUS); TMhelix (TMHMM)	no GO terms	no GO terms
snap_masked-Pseudochromosome_1-processed-gene-3.53	hypothetical protein FOC4_g10007530	333	0.0					mobidb-lite (MOBIDB_LITE); PTHR38166 (PANTHER)	no GO terms	no GO terms
genemark-Pseudochromosome_1-processed-gene-9.1	tRNA (adenine-N(1)-)-methyltransferase non-catalytic subunit	574	0.0	C:GO:0005737; P:GO:0006399; F:GO:0008135; F:GO:0008168; F:GO:0016491; C:GO:0032991; F:GO:0043167	C:cytoplasm; P:tRNA metabolic process; F:translation factor activity, RNA binding; F:methyltransferase activity; F:oxidoreductase activity; C:protein-containing complex; F:ion binding	EC:1.14.13.8; EC:1.14.13	Flavin-containing monooxygenase; Acting on paired donors, with incorporation or reduction of molecular oxygen. The oxygen incorporated need not be derived from O(2)	IPR017423 (PFAM); mobidb-lite (MOBIDB_LITE); mobidb-lite (MOBIDB_LITE); mobidb-lite (MOBIDB_LITE); IPR017423 (PANTHER)	P:GO:0030488; C:GO:0031515	P:tRNA methylation; C:tRNA (m1A) methyltransferase complex
snap_masked-Pseudochromosome_1-processed-gene-3.34	Ankyrin repeat	239	1.20993E-34	F:GO:0003674	F:molecular_function			IPR002110 (PRINTS); IPR002110 (SMART); IPR036770 (G3DSA:1.25.40.GENE3D); IPR020683 (PFAM); PIRSF000654 (PIRSF); PTHR24203 (PANTHER); IPR002110 (PROSITE_PROFILES); IPR002110 (PROSITE_PROFILES); IPR020683 (PROSITE_PROFILES); IPR002110 (PROSITE_PROFILES); IPR002110 (PROSITE_PROFILES); IPR020683 (CDD); IPR036770 (SUPERFAMILY)	F:GO:0005515	F:protein binding
snap_masked-Pseudochromosome_1-processed-gene-5.76	hypothetical protein FOQG_04756	676	0.0	F:GO:0003677; F:GO:0004518; C:GO:0005634; P:GO:0006259; P:GO:0006950; C:GO:0032991	F:DNA binding; F:nuclease activity; C:nucleus; P:DNA metabolic process; P:response to stress; C:protein-containing complex			Coil (COILS); IPR006166 (SMART); G3DSA:3.40.50.10130 (GENE3D); G3DSA:1.10.150.670 (GENE3D); IPR006166 (PFAM); mobidb-lite (MOBIDB_LITE); mobidb-lite (MOBIDB_LITE); mobidb-lite (MOBIDB_LITE); mobidb-lite (MOBIDB_LITE); mobidb-lite (MOBIDB_LITE); mobidb-lite (MOBIDB_LITE); mobidb-lite (MOBIDB_LITE); mobidb-lite (MOBIDB_LITE); mobidb-lite (MOBIDB_LITE); mobidb-lite (MOBIDB_LITE); mobidb-lite (MOBIDB…	F:GO:0003677; F:GO:0004518; C:GO:0005634; P:GO:0006281; C:GO:0048476	F:DNA binding; F:nuclease activity; C:nucleus; P:DNA repair; C:Holliday junction resolvase complex
genemark-Pseudochromosome_1-processed-gene-8.18	probable protein-tyrosine-phosphatase	972	0.0	P:GO:0006464; F:GO:0016791	P:cellular protein modification process; F:phosphatase activity	EC:3.1.3.16; EC:3.1.3.48	Protein-serine/threonine phosphatase; Protein-tyrosine-phosphatase	IPR000242 (PRINTS); IPR003595 (SMART); IPR001763 (SMART); IPR000242 (SMART); IPR000242 (PFAM); IPR001763 (PFAM); IPR036873 (G3DSA:3.40.250.GENE3D); mobidb-lite (MOBIDB_LITE); mobidb-lite (MOBIDB_LITE); mobidb-lite (MOBIDB_LITE); mobidb-lite (MOBIDB_LITE); mobidb-lite (MOBIDB_LITE); mobidb-lite (MOBIDB_LITE); mobidb-lite (MOBIDB_LITE); mobidb-lite (MOBIDB_LITE); mobidb-lite (MOBIDB_LITE); mobidb-l…	F:GO:0004725; P:GO:0006470; P:GO:0016311; F:GO:0016791	F:protein tyrosine phosphatase activity; P:protein dephosphorylation; P:dephosphorylation; F:phosphatase activity
snap_masked-Pseudochromosome_1-processed-gene-2.29	hypothetical protein FVER14953_09900	264	3.15134E-165					PTHR40619 (PANTHER)	no GO terms	no GO terms
genemark-Pseudochromosome_1-processed-gene-2.91	hypothetical protein FNYG_05210	346	0.0	F:GO:0008233	F:peptidase activity			IPR013094 (PFAM); IPR029058 (G3DSA:3.40.50.GENE3D); PTHR43526 (PANTHER); IPR029058 (SUPERFAMILY)	F:GO:0016787	F:hydrolase activity
genemark-Pseudochromosome_1-processed-gene-1.45	related to WSC2 Glucoamylase III (alpha-1,4-glucan-glucosidase)	281	0.0	C:GO:0005575	C:cellular_component			mobidb-lite (MOBIDB_LITE); mobidb-lite (MOBIDB_LITE); mobidb-lite (MOBIDB_LITE); mobidb-lite (MOBIDB_LITE); PTHR34992:SF5 (PANTHER); PTHR34992 (PANTHER); SIGNAL_PEPTIDE_H_REGION (PHOBIUS); SIGNAL_PEPTIDE_C_REGION (PHOBIUS); SIGNAL_PEPTIDE_N_REGION (PHOBIUS); NON_CYTOPLASMIC_DOMAIN (PHOBIUS); CYTOPLASMIC_DOMAIN (PHOBIUS); SIGNAL_PEPTIDE (PHOBIUS); TRANSMEMBRANE (PHOBIUS); cd12087 (CDD); SignalP-no…	no GO terms	no GO terms
genemark-Pseudochromosome_1-processed-gene-1.34	Beta-hexosaminidase subunit A1	297	0.0	P:GO:0005975; F:GO:0016798	P:carbohydrate metabolic process; F:hydrolase activity, acting on glycosyl bonds	EC:3.2.1.52	Beta-N-acetylhexosaminidase	IPR025705 (PRINTS); IPR015883 (PFAM); G3DSA:3.20.20.80 (GENE3D); PTHR22600 (PANTHER); IPR017853 (SUPERFAMILY)	F:GO:0004553; F:GO:0004563; P:GO:0005975	F:hydrolase activity, hydrolyzing O-glycosyl compounds; F:beta-N-acetylhexosaminidase activity; P:carbohydrate metabolic process
genemark-Pseudochromosome_1-processed-gene-9.23	probable mitochondrial phosphate transport protein MIR1	321	0.0	C:GO:0005575; F:GO:0022857	C:cellular_component; F:transmembrane transporter activity			IPR002067 (PRINTS); IPR018108 (PFAM); IPR023395 (G3DSA:1.50.40.GENE3D); PTHR24089:SF469 (PANTHER); IPR040062 (PANTHER); IPR018108 (PROSITE_PROFILES); IPR018108 (PROSITE_PROFILES); IPR018108 (PROSITE_PROFILES); IPR023395 (SUPERFAMILY)	F:GO:0022857; P:GO:0055085	F:transmembrane transporter activity; P:transmembrane transport
genemark-Pseudochromosome_1-processed-gene-3.98	related to beta-lactamase	365	0.0					G3DSA:3.40.710.30 (GENE3D); IPR001466 (PFAM); PTHR43319:SF3 (PANTHER); PTHR43319 (PANTHER); IPR012338 (SUPERFAMILY)	no GO terms	no GO terms
genemark-Pseudochromosome_1-processed-gene-14.25	related to armadillo repeat protein	1009	0.0					IPR011989 (G3DSA:1.25.10.GENE3D); mobidb-lite (MOBIDB_LITE); mobidb-lite (MOBIDB_LITE); mobidb-lite (MOBIDB_LITE); IPR038739 (PANTHER); IPR016024 (SUPERFAMILY); IPR016024 (SUPERFAMILY)	no GO terms	no GO terms
snap_masked-Pseudochromosome_1-processed-gene-5.68	related to oxidoreductase	265	0.0					IPR005645 (PFAM); IPR029058 (G3DSA:3.40.50.GENE3D); PTHR22778 (PANTHER); PTHR22778:SF17 (PANTHER); IPR029058 (SUPERFAMILY)	no GO terms	no GO terms
genemark-Pseudochromosome_1-processed-gene-14.9	related to SPT23-suppressor of TY retrotransposon	1403	0.0	F:GO:0003674; C:GO:0005575	F:molecular_function; C:cellular_component			IPR002909 (SMART); IPR002110 (SMART); IPR013783 (G3DSA:2.60.40.GENE3D); PF13857 (PFAM); IPR036770 (G3DSA:1.25.40.GENE3D); IPR002909 (PFAM); mobidb-lite (MOBIDB_LITE); mobidb-lite (MOBIDB_LITE); mobidb-lite (MOBIDB_LITE); mobidb-lite (MOBIDB_LITE); mobidb-lite (MOBIDB_LITE); mobidb-lite (MOBIDB_LITE); mobidb-lite (MOBIDB_LITE); mobidb-lite (MOBIDB_LITE); mobidb-lite (MOBIDB_LITE); mobidb-lite (MOB…	F:GO:0005515	F:protein binding
genemark-Pseudochromosome_1-processed-gene-4.40	related to TOB3 (member of AAA-ATPase family)	1321	0.0	F:GO:0043167	F:ion binding			Coil (COILS); Coil (COILS); IPR003593 (SMART); IPR003959 (PFAM); G3DSA:3.40.50.300 (GENE3D); mobidb-lite (MOBIDB_LITE); mobidb-lite (MOBIDB_LITE); mobidb-lite (MOBIDB_LITE); mobidb-lite (MOBIDB_LITE); mobidb-lite (MOBIDB_LITE); mobidb-lite (MOBIDB_LITE); mobidb-lite (MOBIDB_LITE); mobidb-lite (MOBIDB_LITE); mobidb-lite (MOBIDB_LITE); mobidb-lite (MOBIDB_LITE); mobidb-lite (MOBIDB_LITE); mobidb-li…	F:GO:0005524	F:ATP binding
snap_masked-Pseudochromosome_1-processed-gene-7.58	uncharacterized protein FFB20_14763	73	4.24048E-14					mobidb-lite (MOBIDB_LITE)	no GO terms	no GO terms
genemark-Pseudochromosome_1-processed-gene-4.21	related to methyltransferase	848	0.0	F:GO:0008168; F:GO:0016740; P:GO:0032259; F:GO:0043531	F:methyltransferase activity; F:transferase activity; P:methylation; F:ADP binding			G3DSA:3.40.50.150 (GENE3D); PF13489 (PFAM); PTHR43591:SF10 (PANTHER); PTHR43591 (PANTHER); cd02440 (CDD); IPR029063 (SUPERFAMILY)	no GO terms	no GO terms
snap_masked-Pseudochromosome_1-processed-gene-4.100	hypothetical protein FOXG_10980	231	7.94436E-132	F:GO:0003674; C:GO:0005575	F:molecular_function; C:cellular_component			IPR001810 (PFAM); IPR020683 (PROSITE_PROFILES); IPR036770 (SUPERFAMILY)	F:GO:0005515	F:protein binding
genemark-Pseudochromosome_1-processed-gene-14.14	glutamate synthase [NADPH]	2769	0.0	F:GO:0004518; P:GO:0006520; P:GO:0009058; F:GO:0016491; F:GO:0043167	F:nuclease activity; P:cellular amino acid metabolic process; P:biosynthetic process; F:oxidoreductase activity; F:ion binding	EC:1.4.1.14	Glutamate synthase (NADH)	PR00419 (PRINTS); IPR002489 (PFAM); IPR027434 (G3DSA:3.10.28.GENE3D); IPR017932 (PFAM); IPR013785 (G3DSA:3.20.20.GENE3D); IPR036188 (G3DSA:3.50.50.GENE3D); IPR009051 (G3DSA:1.10.1060.GENE3D); IPR029055 (G3DSA:3.60.20.GENE3D); IPR006005 (TIGRFAM); IPR036485 (G3DSA:2.160.20.GENE3D); IPR028261 (PFAM); IPR006982 (PFAM); IPR002932 (PFAM); IPR013785 (G3DSA:3.20.20.GENE3D); IPR023753 (PFAM); IPR036188 (…	F:GO:0003824; F:GO:0004519; P:GO:0006537; P:GO:0006807; F:GO:0015930; F:GO:0016491; F:GO:0016638; F:GO:0016639; F:GO:0051536; P:GO:0055114	F:catalytic activity; F:endonuclease activity; P:glutamate biosynthetic process; P:nitrogen compound metabolic process; F:glutamate synthase activity; F:oxidoreductase activity; F:oxidoreductase activity, acting on the CH-NH2 group of donors; F:oxidoreductase activity, acting on the CH-NH2 group of donors, NAD or NADP as acceptor; F:iron-sulfur cluster binding; P:oxidation-reduction process
genemark-Pseudochromosome_1-processed-gene-6.88	uncharacterized protein LW93_11316	346	7.10187E-131					Coil (COILS); mobidb-lite (MOBIDB_LITE); mobidb-lite (MOBIDB_LITE); mobidb-lite (MOBIDB_LITE); mobidb-lite (MOBIDB_LITE); mobidb-lite (MOBIDB_LITE); mobidb-lite (MOBIDB_LITE)	no GO terms	no GO terms
genemark-Pseudochromosome_1-processed-gene-12.46	probable RAX1 Protein involved in determination of budding patterns	363	0.0	C:GO:0005575	C:cellular_component			IPR016137 (SMART); IPR016137 (PFAM); mobidb-lite (MOBIDB_LITE); mobidb-lite (MOBIDB_LITE); PTHR13155 (PANTHER); NON_CYTOPLASMIC_DOMAIN (PHOBIUS); TRANSMEMBRANE (PHOBIUS); CYTOPLASMIC_DOMAIN (PHOBIUS); CYTOPLASMIC_DOMAIN (PHOBIUS); TRANSMEMBRANE (PHOBIUS); NON_CYTOPLASMIC_DOMAIN (PHOBIUS); TRANSMEMBRANE (PHOBIUS); IPR016137 (PROSITE_PROFILES); cd07440 (CDD); IPR036305 (SUPERFAMILY); TMhelix (TMHMM…	no GO terms	no GO terms
genemark-Pseudochromosome_1-processed-gene-12.43	IQ domain-containing protein containing GTPase activating protein	1766	0.0	F:GO:0003674; P:GO:0007165	F:molecular_function; P:signal transduction			Coil (COILS); Coil (COILS); IPR000048 (SMART); IPR001715 (SMART); IPR001936 (SMART); IPR000048 (PFAM); G3DSA:1.10.506.10 (GENE3D); IPR001715 (PFAM); IPR001936 (PFAM); IPR000593 (PFAM); IPR036872 (G3DSA:1.10.418.GENE3D); mobidb-lite (MOBIDB_LITE); mobidb-lite (MOBIDB_LITE); mobidb-lite (MOBIDB_LITE); mobidb-lite (MOBIDB_LITE); mobidb-lite (MOBIDB_LITE); PTHR14149 (PANTHER); PTHR14149:SF14 (PANTHER…	F:GO:0005515; P:GO:0007165; P:GO:0043087	F:protein binding; P:signal transduction; P:regulation of GTPase activity
genemark-Pseudochromosome_1-processed-gene-12.21	uncharacterized protein FMAN_00391	162	1.53614E-105	C:GO:0005575	C:cellular_component			PF08592 (PFAM); PTHR35042:SF1 (PANTHER); PTHR35042 (PANTHER); NON_CYTOPLASMIC_DOMAIN (PHOBIUS); NON_CYTOPLASMIC_DOMAIN (PHOBIUS); CYTOPLASMIC_DOMAIN (PHOBIUS); TRANSMEMBRANE (PHOBIUS); SIGNAL_PEPTIDE (PHOBIUS); CYTOPLASMIC_DOMAIN (PHOBIUS); TRANSMEMBRANE (PHOBIUS); SIGNAL_PEPTIDE_H_REGION (PHOBIUS); SIGNAL_PEPTIDE_N_REGION (PHOBIUS); SIGNAL_PEPTIDE_C_REGION (PHOBIUS); TRANSMEMBRANE (PHOBIUS); TMh…	no GO terms	no GO terms
genemark-Pseudochromosome_1-processed-gene-12.24	related to P.ciliare possible apospory-associated protein	313	0.0	P:GO:0005975; F:GO:0016853	P:carbohydrate metabolic process; F:isomerase activity	EC:5.1.3.15	Glucose-6-phosphate 1-epimerase	IPR008183 (PFAM); IPR014718 (G3DSA:2.70.98.GENE3D); IPR025532 (PIRSF); mobidb-lite (MOBIDB_LITE); PTHR11122 (PANTHER); PTHR11122:SF13 (PANTHER); IPR025532 (CDD); IPR011013 (SUPERFAMILY)	F:GO:0003824; P:GO:0005975; F:GO:0016853; F:GO:0030246	F:catalytic activity; P:carbohydrate metabolic process; F:isomerase activity; F:carbohydrate binding
snap_masked-Pseudochromosome_1-processed-gene-7.39	uncharacterized protein FMAN_00240	923	0.0					mobidb-lite (MOBIDB_LITE); mobidb-lite (MOBIDB_LITE); mobidb-lite (MOBIDB_LITE); mobidb-lite (MOBIDB_LITE); mobidb-lite (MOBIDB_LITE); mobidb-lite (MOBIDB_LITE); mobidb-lite (MOBIDB_LITE); mobidb-lite (MOBIDB_LITE); mobidb-lite (MOBIDB_LITE); mobidb-lite (MOBIDB_LITE); mobidb-lite (MOBIDB_LITE); mobidb-lite (MOBIDB_LITE); mobidb-lite (MOBIDB_LITE); mobidb-lite (MOBIDB_LITE); mobidb-lite (MOBIDB_L…	no GO terms	no GO terms
snap_masked-Pseudochromosome_1-processed-gene-13.81	hypothetical protein FPRO05_04621	445	0.0					Coil (COILS); mobidb-lite (MOBIDB_LITE); mobidb-lite (MOBIDB_LITE); mobidb-lite (MOBIDB_LITE); mobidb-lite (MOBIDB_LITE); mobidb-lite (MOBIDB_LITE); mobidb-lite (MOBIDB_LITE); mobidb-lite (MOBIDB_LITE); SignalP-TM (SIGNALP_GRAM_POSITIVE)	no GO terms	no GO terms
genemark-Pseudochromosome_1-processed-gene-12.13	related to peroxisomal ABC transporter 1	810	0.0	C:GO:0005777; P:GO:0006629; P:GO:0009056; F:GO:0016887; F:GO:0022857; C:GO:0032991; F:GO:0043167; P:GO:0044281	C:peroxisome; P:lipid metabolic process; P:catabolic process; F:ATPase activity; F:transmembrane transporter activity; C:protein-containing complex; F:ion binding; P:small molecule metabolic process	EC:3.6.1.3; EC:3.6.3.47; EC:3.6.1.15	Adenosinetriphosphatase; Fatty-acyl-CoA-transporting ATPase; Nucleoside-triphosphate phosphatase	Coil (COILS); IPR003593 (SMART); IPR003439 (PFAM); IPR011527 (PFAM); G3DSA:3.40.50.300 (GENE3D); PTHR11384 (PANTHER); PTHR11384:SF13 (PANTHER); TRANSMEMBRANE (PHOBIUS); NON_CYTOPLASMIC_DOMAIN (PHOBIUS); CYTOPLASMIC_DOMAIN (PHOBIUS); CYTOPLASMIC_DOMAIN (PHOBIUS); NON_CYTOPLASMIC_DOMAIN (PHOBIUS); TRANSMEMBRANE (PHOBIUS); TRANSMEMBRANE (PHOBIUS); IPR003439 (PROSITE_PROFILES); IPR011527 (PROSITE_PRO…	F:GO:0005524; C:GO:0016021; F:GO:0016887; F:GO:0042626; P:GO:0055085	F:ATP binding; C:integral component of membrane; F:ATPase activity; F:ATPase-coupled transmembrane transporter activity; P:transmembrane transport
genemark-Pseudochromosome_1-processed-gene-10.12	uncharacterized protein FPRO_00333	394	0.0	F:GO:0003674; C:GO:0005575	F:molecular_function; C:cellular_component			IPR001810 (PFAM); CYTOPLASMIC_DOMAIN (PHOBIUS); TRANSMEMBRANE (PHOBIUS); CYTOPLASMIC_DOMAIN (PHOBIUS); TRANSMEMBRANE (PHOBIUS); NON_CYTOPLASMIC_DOMAIN (PHOBIUS); CYTOPLASMIC_DOMAIN (PHOBIUS); TRANSMEMBRANE (PHOBIUS); TRANSMEMBRANE (PHOBIUS); NON_CYTOPLASMIC_DOMAIN (PHOBIUS); NON_CYTOPLASMIC_DOMAIN (PHOBIUS); TRANSMEMBRANE (PHOBIUS); IPR001810 (PROSITE_PROFILES); IPR036047 (SUPERFAMILY); TMhelix (…	F:GO:0005515	F:protein binding
maker-Pseudochromosome_1-augustus-gene-2.16	related to methyltransferase	414	0.0	F:GO:0008168	F:methyltransferase activity			PF13489 (PFAM); G3DSA:3.40.50.150 (GENE3D); mobidb-lite (MOBIDB_LITE); mobidb-lite (MOBIDB_LITE); PTHR43591 (PANTHER); PTHR43591:SF10 (PANTHER); PTHR43591 (PANTHER); PTHR43591:SF10 (PANTHER); cd02440 (CDD); IPR029063 (SUPERFAMILY)	no GO terms	no GO terms
augustus_masked-Pseudochromosome_1-processed-gene-4.67	related to flavonol synthase-like protein	736	0.0	F:GO:0016491; F:GO:0043167	F:oxidoreductase activity; F:ion binding			IPR000639 (PRINTS); IPR027443 (G3DSA:2.60.120.GENE3D); IPR026992 (PFAM); IPR029058 (G3DSA:3.40.50.GENE3D); IPR000073 (PFAM); IPR005123 (PFAM); PTHR10209:SF87 (PANTHER); PTHR10209 (PANTHER); IPR005123 (PROSITE_PROFILES); IPR029058 (SUPERFAMILY); SSF51197 (SUPERFAMILY)	F:GO:0003824; F:GO:0016491; P:GO:0055114	F:catalytic activity; F:oxidoreductase activity; P:oxidation-reduction process
snap_masked-Pseudochromosome_1-processed-gene-11.72	related to GTP-binding protein rab2	254	0.0	F:GO:0003924; C:GO:0005768; C:GO:0005794; C:GO:0005829; P:GO:0006950; P:GO:0016192; F:GO:0043167	F:GTPase activity; C:endosome; C:Golgi apparatus; C:cytosol; P:response to stress; P:vesicle-mediated transport; F:ion binding	EC:3.6.1.15	Nucleoside-triphosphate phosphatase	PR00449 (PRINTS); SM00173 (SMART); SM00174 (SMART); SM00176 (SMART); SM00175 (SMART); G3DSA:3.40.50.300 (GENE3D); IPR001806 (PFAM); IPR005225 (TIGRFAM); mobidb-lite (MOBIDB_LITE); mobidb-lite (MOBIDB_LITE); mobidb-lite (MOBIDB_LITE); PTHR24073:SF354 (PANTHER); PTHR24073 (PANTHER); PS51419 (PROSITE_PROFILES); cd00154 (CDD); IPR027417 (SUPERFAMILY)	F:GO:0003924; F:GO:0005525	F:GTPase activity; F:GTP binding
snap_masked-Pseudochromosome_1-processed-gene-5.84	pH-response regulator protein palA/rim-20	839	0.0	F:GO:0003674	F:molecular_function			Coil (COILS); Coil (COILS); IPR004328 (SMART); G3DSA:1.20.120.560 (GENE3D); IPR038499 (G3DSA:1.25.40.GENE3D); G3DSA:1.20.140.50 (GENE3D); IPR025304 (PFAM); IPR004328 (PFAM); mobidb-lite (MOBIDB_LITE); mobidb-lite (MOBIDB_LITE); PTHR23030:SF22 (PANTHER); PTHR23030 (PANTHER); IPR004328 (PROSITE_PROFILES); cd09236 (CDD); cd09241 (CDD)	F:GO:0005515	F:protein binding
snap_masked-Pseudochromosome_1-processed-gene-7.47	-No description-	66						mobidb-lite (MOBIDB_LITE); mobidb-lite (MOBIDB_LITE)	no GO terms	no GO terms
augustus_masked-Pseudochromosome_1-processed-gene-7.84	E3 ubiquitin-protein ligase RNF216-like	182	5.00309E-32					no IPS match	no IPS match	no IPS match
genemark-Pseudochromosome_1-processed-gene-13.2	hypothetical protein FOQG_04985	621	0.0	F:GO:0003674	F:molecular_function			mobidb-lite (MOBIDB_LITE); mobidb-lite (MOBIDB_LITE); mobidb-lite (MOBIDB_LITE); mobidb-lite (MOBIDB_LITE); mobidb-lite (MOBIDB_LITE); mobidb-lite (MOBIDB_LITE); PTHR38166 (PANTHER); IPR013087 (PROSITE_PROFILES)	F:GO:0003676	F:nucleic acid binding
snap_masked-Pseudochromosome_1-processed-gene-3.67	NAD(P)-binding protein	329	0.0	F:GO:0003674; C:GO:0005575	F:molecular_function; C:cellular_component			G3DSA:3.40.50.720 (GENE3D); G3DSA:3.40.50.720 (GENE3D); IPR013120 (PFAM); PTHR43349 (PANTHER); PTHR43349:SF6 (PANTHER); PS51257 (PROSITE_PROFILES); IPR036291 (SUPERFAMILY)	no GO terms	no GO terms
genemark-Pseudochromosome_1-processed-gene-2.117	related to 2`-hydroxyisoflavone reductase	309	0.0					G3DSA:3.90.25.10 (GENE3D); G3DSA:3.40.50.720 (GENE3D); IPR008030 (PFAM); PTHR14194:SF87 (PANTHER); PTHR14194 (PANTHER); IPR036291 (SUPERFAMILY)	no GO terms	no GO terms
genemark-Pseudochromosome_1-processed-gene-2.106	related to 3-oxoacyl-[acyl-carrier-protein] reductase	260	0.0	F:GO:0016491	F:oxidoreductase activity			IPR002347 (PRINTS); SM00822 (SMART); PF13561 (PFAM); G3DSA:3.40.50.720 (GENE3D); PTHR42760:SF69 (PANTHER); PTHR42760 (PANTHER); IPR036291 (SUPERFAMILY)	no GO terms	no GO terms
snap_masked-Pseudochromosome_1-processed-gene-2.37	related to ARO80-positive transcription regulator of ARO9 and ARO10	178	2.04089E-85	F:GO:0003700; C:GO:0005634; P:GO:0009058; P:GO:0034641; F:GO:0043167	F:DNA-binding transcription factor activity; C:nucleus; P:biosynthetic process; P:cellular nitrogen compound metabolic process; F:ion binding			mobidb-lite (MOBIDB_LITE); mobidb-lite (MOBIDB_LITE); mobidb-lite (MOBIDB_LITE); mobidb-lite (MOBIDB_LITE)	no GO terms	no GO terms
genemark-Pseudochromosome_1-processed-gene-7.22	related to MUC1 Extracellular alpha-1,4-glucan glucosidase	1590	0.0	F:GO:0003674	F:molecular_function			Coil (COILS); IPR015943 (G3DSA:2.130.10.GENE3D); mobidb-lite (MOBIDB_LITE); mobidb-lite (MOBIDB_LITE); mobidb-lite (MOBIDB_LITE); mobidb-lite (MOBIDB_LITE); mobidb-lite (MOBIDB_LITE); mobidb-lite (MOBIDB_LITE); mobidb-lite (MOBIDB_LITE); mobidb-lite (MOBIDB_LITE); mobidb-lite (MOBIDB_LITE); mobidb-lite (MOBIDB_LITE); mobidb-lite (MOBIDB_LITE); mobidb-lite (MOBIDB_LITE); mobidb-lite (MOBIDB_LITE);…	F:GO:0005515	F:protein binding
augustus_masked-Pseudochromosome_1-processed-gene-13.34	hypothetical protein FVER53263_09562	639	0.0					Coil (COILS); Coil (COILS); mobidb-lite (MOBIDB_LITE); mobidb-lite (MOBIDB_LITE); mobidb-lite (MOBIDB_LITE); mobidb-lite (MOBIDB_LITE)	no GO terms	no GO terms
maker-Pseudochromosome_1-augustus-gene-3.13	probable alpha-glucoside transport protein	584	0.0	C:GO:0005575; F:GO:0022857	C:cellular_component; F:transmembrane transporter activity			IPR003663 (PRINTS); IPR003663 (TIGRFAM); G3DSA:1.20.1250.20 (GENE3D); IPR005828 (PFAM); PTHR23500 (PANTHER); PTHR23500:SF162 (PANTHER); NON_CYTOPLASMIC_DOMAIN (PHOBIUS); NON_CYTOPLASMIC_DOMAIN (PHOBIUS); TRANSMEMBRANE (PHOBIUS); TRANSMEMBRANE (PHOBIUS); NON_CYTOPLASMIC_DOMAIN (PHOBIUS); CYTOPLASMIC_DOMAIN (PHOBIUS); TRANSMEMBRANE (PHOBIUS); CYTOPLASMIC_DOMAIN (PHOBIUS); NON_CYTOPLASMIC_DOMAIN (PH…	C:GO:0016020; C:GO:0016021; F:GO:0022857; P:GO:0055085	C:membrane; C:integral component of membrane; F:transmembrane transporter activity; P:transmembrane transport
genemark-Pseudochromosome_1-processed-gene-1.23	predicted protein [	78	8.13871E-33	F:GO:0000981; C:GO:0005634; P:GO:0006355; P:GO:0006357; F:GO:0008270	F:DNA-binding transcription factor activity, RNA polymerase II-specific; C:nucleus; P:regulation of transcription, DNA-templated; P:regulation of transcription by RNA polymerase II; F:zinc ion binding			no IPS match	no IPS match	no IPS match
genemark-Pseudochromosome_1-processed-gene-13.21	related to zinc finger protein	419	0.0	F:GO:0003674	F:molecular_function			IPR013087 (SMART); IPR013087 (PFAM); G3DSA:3.30.160.60 (GENE3D); G3DSA:3.30.160.60 (GENE3D); G3DSA:3.30.160.60 (GENE3D); G3DSA:3.30.160.60 (GENE3D); mobidb-lite (MOBIDB_LITE); mobidb-lite (MOBIDB_LITE); mobidb-lite (MOBIDB_LITE); PTHR44232 (PANTHER); IPR013087 (PROSITE_PROFILES); IPR013087 (PROSITE_PROFILES); IPR013087 (PROSITE_PROFILES); IPR013087 (PROSITE_PROFILES); IPR036236 (SUPERFAMILY); IPR…	F:GO:0003676	F:nucleic acid binding
snap_masked-Pseudochromosome_1-processed-gene-9.41	uncharacterized protein FFM5_10221	61	5.08965E-6					no IPS match	no IPS match	no IPS match
genemark-Pseudochromosome_1-processed-gene-5.2	related to allantoate permease	513	0.0	C:GO:0005575; P:GO:0055085	C:cellular_component; P:transmembrane transport			IPR011701 (PFAM); G3DSA:1.20.1250.20 (GENE3D); G3DSA:1.20.1250.20 (GENE3D); PTHR43791:SF70 (PANTHER); PTHR43791 (PANTHER); TRANSMEMBRANE (PHOBIUS); TRANSMEMBRANE (PHOBIUS); TRANSMEMBRANE (PHOBIUS); TRANSMEMBRANE (PHOBIUS); NON_CYTOPLASMIC_DOMAIN (PHOBIUS); TRANSMEMBRANE (PHOBIUS); TRANSMEMBRANE (PHOBIUS); TRANSMEMBRANE (PHOBIUS); NON_CYTOPLASMIC_DOMAIN (PHOBIUS); TRANSMEMBRANE (PHOBIUS); NON_CYTO…	C:GO:0016021; P:GO:0055085	C:integral component of membrane; P:transmembrane transport
snap_masked-Pseudochromosome_1-processed-gene-14.36	-No description-	65						mobidb-lite (MOBIDB_LITE)	no GO terms	no GO terms
maker-Pseudochromosome_1-snap-gene-4.4	uncharacterized protein LW94_15126	661	0.0					IPR036673 (G3DSA:2.30.60.GENE3D); IPR011058 (PFAM); SIGNAL_PEPTIDE_C_REGION (PHOBIUS); SIGNAL_PEPTIDE_N_REGION (PHOBIUS); NON_CYTOPLASMIC_DOMAIN (PHOBIUS); SIGNAL_PEPTIDE (PHOBIUS); SIGNAL_PEPTIDE_H_REGION (PHOBIUS); SignalP-noTM (SIGNALP_EUK); SignalP-noTM (SIGNALP_GRAM_NEGATIVE); IPR036673 (SUPERFAMILY)	no GO terms	no GO terms
snap_masked-Pseudochromosome_1-processed-gene-8.63	-No description-	76						no IPS match	no IPS match	no IPS match
snap_masked-Pseudochromosome_1-processed-gene-6.73	probable signal transduction scaffold protein, essential for virulence and fertility	855	0.0	F:GO:0003674	F:molecular_function			Coil (COILS); Coil (COILS); IPR020472 (PRINTS); IPR001680 (SMART); IPR015943 (G3DSA:2.130.10.GENE3D); IPR013258 (PFAM); IPR001680 (PFAM); IPR015943 (G3DSA:2.130.10.GENE3D); G3DSA:1.20.5.300 (GENE3D); mobidb-lite (MOBIDB_LITE); mobidb-lite (MOBIDB_LITE); mobidb-lite (MOBIDB_LITE); mobidb-lite (MOBIDB_LITE); mobidb-lite (MOBIDB_LITE); mobidb-lite (MOBIDB_LITE); mobidb-lite (MOBIDB_LITE); mobidb-lit…	F:GO:0005515	F:protein binding
maker-Pseudochromosome_1-snap-gene-3.0	related to xylan 1,4-beta-xylosidase	782	0.0	P:GO:0005975; F:GO:0016798	P:carbohydrate metabolic process; F:hydrolase activity, acting on glycosyl bonds			IPR001764 (PRINTS); IPR026891 (SMART); IPR001764 (PFAM); IPR036962 (G3DSA:3.20.20.GENE3D); IPR013783 (G3DSA:2.60.40.GENE3D); IPR036881 (G3DSA:3.40.50.GENE3D); IPR002772 (PFAM); PTHR42721:SF3 (PANTHER); PTHR42721 (PANTHER); SIGNAL_PEPTIDE_C_REGION (PHOBIUS); SIGNAL_PEPTIDE (PHOBIUS); SIGNAL_PEPTIDE_N_REGION (PHOBIUS); SIGNAL_PEPTIDE_H_REGION (PHOBIUS); NON_CYTOPLASMIC_DOMAIN (PHOBIUS); IPR036881 (…	F:GO:0004553; P:GO:0005975	F:hydrolase activity, hydrolyzing O-glycosyl compounds; P:carbohydrate metabolic process
snap_masked-Pseudochromosome_1-processed-gene-6.51	uncharacterized protein FFUJ_01903	544	0.0					IPR032675 (G3DSA:3.80.10.GENE3D)	no GO terms	no GO terms
genemark-Pseudochromosome_1-processed-gene-11.91	related to choline transporter-like protein	766	0.0	C:GO:0005575	C:cellular_component			IPR007603 (PFAM); mobidb-lite (MOBIDB_LITE); mobidb-lite (MOBIDB_LITE); mobidb-lite (MOBIDB_LITE); mobidb-lite (MOBIDB_LITE); mobidb-lite (MOBIDB_LITE); mobidb-lite (MOBIDB_LITE); IPR007603 (PANTHER); PTHR12385:SF73 (PANTHER); CYTOPLASMIC_DOMAIN (PHOBIUS); TRANSMEMBRANE (PHOBIUS); CYTOPLASMIC_DOMAIN (PHOBIUS); TRANSMEMBRANE (PHOBIUS); NON_CYTOPLASMIC_DOMAIN (PHOBIUS); TRANSMEMBRANE (PHOBIUS); CYT…	no GO terms	no GO terms
snap_masked-Pseudochromosome_1-processed-gene-8.85	triacylglycerol lipase	584	0.0	F:GO:0003674	F:molecular_function			IPR002018 (PFAM); IPR029058 (G3DSA:3.40.50.GENE3D); PTHR11559 (PANTHER); PTHR11559:SF162 (PANTHER); SIGNAL_PEPTIDE_H_REGION (PHOBIUS); NON_CYTOPLASMIC_DOMAIN (PHOBIUS); SIGNAL_PEPTIDE_N_REGION (PHOBIUS); SIGNAL_PEPTIDE (PHOBIUS); SIGNAL_PEPTIDE_C_REGION (PHOBIUS); SignalP-noTM (SIGNALP_GRAM_NEGATIVE); SignalP-TM (SIGNALP_GRAM_POSITIVE); SignalP-noTM (SIGNALP_EUK); IPR029058 (SUPERFAMILY)	no GO terms	no GO terms
genemark-Pseudochromosome_1-processed-gene-1.29	hypothetical protein FVER14953_21268	511	1.23908E-163					PTHR42060 (PANTHER); SIGNAL_PEPTIDE_C_REGION (PHOBIUS); NON_CYTOPLASMIC_DOMAIN (PHOBIUS); SIGNAL_PEPTIDE (PHOBIUS); SIGNAL_PEPTIDE_H_REGION (PHOBIUS); SIGNAL_PEPTIDE_N_REGION (PHOBIUS); SignalP-noTM (SIGNALP_EUK); SignalP-TM (SIGNALP_GRAM_POSITIVE); SignalP-noTM (SIGNALP_GRAM_NEGATIVE); SSF63829 (SUPERFAMILY)	no GO terms	no GO terms
genemark-Pseudochromosome_1-processed-gene-5.8	hypothetical protein FVER53590_09805	358	0.0					no IPS match	no IPS match	no IPS match
maker-Pseudochromosome_1-augustus-gene-7.9	-No description-	38						no IPS match	no IPS match	no IPS match
maker-Pseudochromosome_1-snap-gene-7.2	hypothetical protein FVEG_16650	76	5.89869E-36					mobidb-lite (MOBIDB_LITE); mobidb-lite (MOBIDB_LITE)	no GO terms	no GO terms
maker-Pseudochromosome_1-augustus-gene-10.4	probable BNA3-Arylformamidase	465	0.0	P:GO:0006464; P:GO:0009058; F:GO:0016301; F:GO:0043167	P:cellular protein modification process; P:biosynthetic process; F:kinase activity; F:ion binding			IPR015421 (G3DSA:3.40.640.GENE3D); IPR004839 (PFAM); IPR015422 (G3DSA:3.90.1150.GENE3D); PTHR43807 (PANTHER); PTHR43807:SF20 (PANTHER); cd00609 (CDD); SignalP-TM (SIGNALP_GRAM_POSITIVE); IPR015424 (SUPERFAMILY)	F:GO:0003824; P:GO:0009058; F:GO:0030170	F:catalytic activity; P:biosynthetic process; F:pyridoxal phosphate binding
genemark-Pseudochromosome_1-processed-gene-10.26	xanthine dehydrogenase	1368	0.0	P:GO:0006091; F:GO:0016491; F:GO:0043167	P:generation of precursor metabolites and energy; F:oxidoreductase activity; F:ion binding	EC:1.17.3; EC:1.17.1; EC:1.17.1.4; EC:1.17.3.2	Acting on CH or CH(2) groups; Acting on CH or CH(2) groups; Xanthine dehydrogenase; Xanthine oxidase	IPR000674 (SMART); IPR005107 (SMART); IPR001041 (PFAM); IPR005107 (PFAM); IPR008274 (PFAM); IPR016208 (PIRSF); IPR014307 (TIGRFAM); IPR002346 (PFAM); G3DSA:3.30.365.10 (GENE3D); IPR000674 (PFAM); IPR002888 (PFAM); PTHR11908:SF124 (PANTHER); PTHR11908 (PANTHER); PTHR11908 (PANTHER); PTHR11908:SF124 (PANTHER); IPR001041 (PROSITE_PROFILES); IPR016166 (PROSITE_PROFILES); IPR036683 (SUPERFAMILY); IPR0…	F:GO:0004854; F:GO:0004855; F:GO:0005506; F:GO:0009055; F:GO:0016491; F:GO:0046872; F:GO:0050660; F:GO:0051536; P:GO:0055114; F:GO:0071949	F:xanthine dehydrogenase activity; F:xanthine oxidase activity; F:iron ion binding; F:electron transfer activity; F:oxidoreductase activity; F:metal ion binding; F:flavin adenine dinucleotide binding; F:iron-sulfur cluster binding; P:oxidation-reduction process; F:FAD binding
genemark-Pseudochromosome_1-processed-gene-13.17	related to secretory protein SSP120	200	1.2792E-145	F:GO:0043167	F:ion binding			G3DSA:1.10.238.10 (GENE3D); IPR040250 (PANTHER); PTHR19237:SF20 (PANTHER); SIGNAL_PEPTIDE_N_REGION (PHOBIUS); NON_CYTOPLASMIC_DOMAIN (PHOBIUS); SIGNAL_PEPTIDE_C_REGION (PHOBIUS); SIGNAL_PEPTIDE (PHOBIUS); SIGNAL_PEPTIDE_H_REGION (PHOBIUS); IPR002048 (PROSITE_PROFILES); SignalP-TM (SIGNALP_GRAM_POSITIVE); SignalP-noTM (SIGNALP_EUK); SignalP-noTM (SIGNALP_GRAM_NEGATIVE); IPR011992 (SUPERFAMILY)	F:GO:0005509	F:calcium ion binding
snap_masked-Pseudochromosome_1-processed-gene-0.3	hypothetical protein FNYG_02924	359	0.0					Coil (COILS); mobidb-lite (MOBIDB_LITE); mobidb-lite (MOBIDB_LITE)	no GO terms	no GO terms
genemark-Pseudochromosome_1-processed-gene-8.4	related to nicotinamide mononucleotide permease	511	0.0	C:GO:0005575; P:GO:0055085	C:cellular_component; P:transmembrane transport			G3DSA:1.20.1250.20 (GENE3D); IPR011701 (PFAM); G3DSA:1.20.1250.20 (GENE3D); PTHR43791 (PANTHER); PTHR43791:SF48 (PANTHER); CYTOPLASMIC_DOMAIN (PHOBIUS); TRANSMEMBRANE (PHOBIUS); NON_CYTOPLASMIC_DOMAIN (PHOBIUS); TRANSMEMBRANE (PHOBIUS); CYTOPLASMIC_DOMAIN (PHOBIUS); TRANSMEMBRANE (PHOBIUS); NON_CYTOPLASMIC_DOMAIN (PHOBIUS); TRANSMEMBRANE (PHOBIUS); CYTOPLASMIC_DOMAIN (PHOBIUS); NON_CYTOPLASMIC_DO…	C:GO:0016021; P:GO:0055085	C:integral component of membrane; P:transmembrane transport
snap_masked-Pseudochromosome_1-processed-gene-14.51	related to inhibitor of calcineurin	253	1.25739E-180	F:GO:0003674; P:GO:0007165	F:molecular_function; P:signal transduction			IPR006931 (PFAM); IPR012677 (G3DSA:3.30.70.GENE3D); mobidb-lite (MOBIDB_LITE); mobidb-lite (MOBIDB_LITE); mobidb-lite (MOBIDB_LITE); mobidb-lite (MOBIDB_LITE); IPR006931 (PANTHER); PTHR10300:SF14 (PANTHER); cd12434 (CDD); IPR035979 (SUPERFAMILY)	F:GO:0003676; P:GO:0019722	F:nucleic acid binding; P:calcium-mediated signaling
genemark-Pseudochromosome_1-processed-gene-6.127	related to transcription factor KCS1	1456	0.0	P:GO:0009058; F:GO:0016301; P:GO:0044281	P:biosynthetic process; F:kinase activity; P:small molecule metabolic process			Coil (COILS); IPR038286 (G3DSA:1.10.510.GENE3D); IPR005522 (PFAM); mobidb-lite (MOBIDB_LITE); mobidb-lite (MOBIDB_LITE); mobidb-lite (MOBIDB_LITE); mobidb-lite (MOBIDB_LITE); mobidb-lite (MOBIDB_LITE); mobidb-lite (MOBIDB_LITE); mobidb-lite (MOBIDB_LITE); mobidb-lite (MOBIDB_LITE); mobidb-lite (MOBIDB_LITE); mobidb-lite (MOBIDB_LITE); mobidb-lite (MOBIDB_LITE); mobidb-lite (MOBIDB_LITE); mobidb-l…	F:GO:0016301; P:GO:0032958	F:kinase activity; P:inositol phosphate biosynthetic process
snap_masked-Pseudochromosome_1-processed-gene-4.106	related to 6-hydroxy-D-nicotine oxidase	585	0.0	F:GO:0016491; F:GO:0043167	F:oxidoreductase activity; F:ion binding			G3DSA:3.30.465.40 (GENE3D); IPR006094 (PFAM); G3DSA:3.40.462.20 (GENE3D); IPR012951 (PFAM); PTHR42973:SF15 (PANTHER); PTHR42973 (PANTHER); IPR016166 (PROSITE_PROFILES); IPR036318 (SUPERFAMILY)	F:GO:0016491; F:GO:0050660; P:GO:0055114; F:GO:0071949	F:oxidoreductase activity; F:flavin adenine dinucleotide binding; P:oxidation-reduction process; F:FAD binding
snap_masked-Pseudochromosome_1-processed-gene-8.69	uncharacterized protein FMAN_00288	143	1.07792E-59					Coil (COILS); mobidb-lite (MOBIDB_LITE); mobidb-lite (MOBIDB_LITE); mobidb-lite (MOBIDB_LITE)	no GO terms	no GO terms
augustus_masked-Pseudochromosome_1-processed-gene-4.71	predicted protein	589	0.0	F:GO:0003676; P:GO:0006417; C:GO:0030015	F:nucleic acid binding; P:regulation of translation; C:CCR4-NOT core complex			mobidb-lite (MOBIDB_LITE); mobidb-lite (MOBIDB_LITE)	no GO terms	no GO terms
genemark-Pseudochromosome_1-processed-gene-4.49	D-amino-acid oxidase	362	0.0	P:GO:0006520; F:GO:0016491; F:GO:0043167	P:cellular amino acid metabolic process; F:oxidoreductase activity; F:ion binding	EC:1.4.3.3	D-amino-acid oxidase	G3DSA:3.30.9.10 (GENE3D); IPR023209 (PIRSF); IPR006076 (PFAM); G3DSA:3.40.50.720 (GENE3D); PTHR11530:SF16 (PANTHER); IPR023209 (PANTHER); SIGNAL_PEPTIDE (PHOBIUS); SIGNAL_PEPTIDE_C_REGION (PHOBIUS); SIGNAL_PEPTIDE_N_REGION (PHOBIUS); SIGNAL_PEPTIDE_H_REGION (PHOBIUS); NON_CYTOPLASMIC_DOMAIN (PHOBIUS); SSF51971 (SUPERFAMILY); SSF54373 (SUPERFAMILY); TMhelix (TMHMM)	F:GO:0003884; F:GO:0016491; P:GO:0046416; P:GO:0055114; F:GO:0071949	F:D-amino-acid oxidase activity; F:oxidoreductase activity; P:D-amino acid metabolic process; P:oxidation-reduction process; F:FAD binding
snap_masked-Pseudochromosome_1-processed-gene-4.118	probable proteine disulfate isomerase	495	0.0	C:GO:0005623; F:GO:0016853; P:GO:0042592	C:cell; F:isomerase activity; P:homeostatic process			G3DSA:3.40.30.10 (GENE3D); G3DSA:3.40.30.10 (GENE3D); PF13848 (PFAM); IPR013766 (PFAM); G3DSA:3.40.30.10 (GENE3D); mobidb-lite (MOBIDB_LITE); PTHR18929:SF132 (PANTHER); PTHR18929 (PANTHER); IPR013766 (PROSITE_PROFILES); cd02961 (CDD); cd02981 (CDD); cd02982 (CDD); IPR036249 (SUPERFAMILY); IPR036249 (SUPERFAMILY); IPR036249 (SUPERFAMILY); IPR036249 (SUPERFAMILY)	P:GO:0045454	P:cell redox homeostasis
snap_masked-Pseudochromosome_1-processed-gene-12.62	related to ribonuclease P protein subunit p30	297	0.0	F:GO:0004518; P:GO:0006399	F:nuclease activity; P:tRNA metabolic process			IPR002738 (PFAM); G3DSA:3.20.20.140 (GENE3D); mobidb-lite (MOBIDB_LITE); mobidb-lite (MOBIDB_LITE); IPR002738 (PANTHER); IPR016195 (SUPERFAMILY)	F:GO:0003824; F:GO:0004540; P:GO:0008033	F:catalytic activity; F:ribonuclease activity; P:tRNA processing
maker-Pseudochromosome_1-augustus-gene-15.10	uncharacterized protein FMAN_00493	445	0.0	C:GO:0005575	C:cellular_component			IPR010640 (PFAM); IPR010640 (PANTHER); NON_CYTOPLASMIC_DOMAIN (PHOBIUS); CYTOPLASMIC_DOMAIN (PHOBIUS); CYTOPLASMIC_DOMAIN (PHOBIUS); CYTOPLASMIC_DOMAIN (PHOBIUS); TRANSMEMBRANE (PHOBIUS); TRANSMEMBRANE (PHOBIUS); TRANSMEMBRANE (PHOBIUS); NON_CYTOPLASMIC_DOMAIN (PHOBIUS); TRANSMEMBRANE (PHOBIUS); TRANSMEMBRANE (PHOBIUS); TRANSMEMBRANE (PHOBIUS); CYTOPLASMIC_DOMAIN (PHOBIUS); CYTOPLASMIC_DOMAIN (PH…	no GO terms	no GO terms
genemark-Pseudochromosome_1-processed-gene-9.29	related to autophagy protein Atg27	340	0.0	C:GO:0005739; C:GO:0005794; P:GO:0006810; P:GO:0006914; C:GO:0031410	C:mitochondrion; C:Golgi apparatus; P:transport; P:autophagy; C:cytoplasmic vesicle			IPR018939 (PFAM); mobidb-lite (MOBIDB_LITE); mobidb-lite (MOBIDB_LITE); PTHR15071:SF13 (PANTHER); PTHR15071 (PANTHER); SIGNAL_PEPTIDE_C_REGION (PHOBIUS); SIGNAL_PEPTIDE_H_REGION (PHOBIUS); SIGNAL_PEPTIDE (PHOBIUS); SIGNAL_PEPTIDE_N_REGION (PHOBIUS); NON_CYTOPLASMIC_DOMAIN (PHOBIUS); TRANSMEMBRANE (PHOBIUS); CYTOPLASMIC_DOMAIN (PHOBIUS); SignalP-TM (SIGNALP_GRAM_POSITIVE); SignalP-noTM (SIGNALP_GR…	no GO terms	no GO terms
augustus_masked-Pseudochromosome_1-processed-gene-9.62	hypothetical protein BN1708_001040	339	2.7243E-6	F:GO:0008270; F:GO:0016491; P:GO:0055114	F:zinc ion binding; F:oxidoreductase activity; P:oxidation-reduction process			mobidb-lite (MOBIDB_LITE); mobidb-lite (MOBIDB_LITE)	no GO terms	no GO terms
genemark-Pseudochromosome_1-processed-gene-7.33	alcohol dehydrogenase	362	0.0	F:GO:0016491	F:oxidoreductase activity			IPR020843 (SMART); IPR013154 (PFAM); IPR013149 (PFAM); G3DSA:3.90.180.10 (GENE3D); G3DSA:3.40.50.720 (GENE3D); PTHR45033:SF1 (PANTHER); PTHR45033 (PANTHER); cd08276 (CDD); IPR036291 (SUPERFAMILY); IPR011032 (SUPERFAMILY)	F:GO:0016491; P:GO:0055114	F:oxidoreductase activity; P:oxidation-reduction process
genemark-Pseudochromosome_1-processed-gene-1.31	hypothetical protein FVEG_16692	633	0.0	C:GO:0005575; F:GO:0043167	C:cellular_component; F:ion binding			Coil (COILS); Coil (COILS); IPR006073 (PFAM); IPR032633 (PFAM); G3DSA:3.40.50.300 (GENE3D); IPR029062 (G3DSA:3.40.50.GENE3D); PTHR43824:SF3 (PANTHER); PTHR43824 (PANTHER); cd00882 (CDD); IPR027417 (SUPERFAMILY); IPR029062 (SUPERFAMILY)	F:GO:0005525	F:GTP binding
snap_masked-Pseudochromosome_1-processed-gene-2.42	uncharacterized protein Y057_6957	380	3.18456E-166					mobidb-lite (MOBIDB_LITE); mobidb-lite (MOBIDB_LITE); mobidb-lite (MOBIDB_LITE); mobidb-lite (MOBIDB_LITE)	no GO terms	no GO terms
genemark-Pseudochromosome_1-processed-gene-2.94	related to pisatin demethylase cytochrome P450	544	0.0	F:GO:0008168; F:GO:0016491; F:GO:0043167	F:methyltransferase activity; F:oxidoreductase activity; F:ion binding			IPR001128 (PRINTS); IPR002401 (PRINTS); IPR001128 (PFAM); IPR036396 (G3DSA:1.10.630.GENE3D); PTHR24305 (PANTHER); PTHR24305:SF115 (PANTHER); NON_CYTOPLASMIC_DOMAIN (PHOBIUS); CYTOPLASMIC_DOMAIN (PHOBIUS); TRANSMEMBRANE (PHOBIUS); NON_CYTOPLASMIC_DOMAIN (PHOBIUS); TRANSMEMBRANE (PHOBIUS); IPR036396 (SUPERFAMILY)	F:GO:0005506; F:GO:0016705; F:GO:0020037; P:GO:0055114	F:iron ion binding; F:oxidoreductase activity, acting on paired donors, with incorporation or reduction of molecular oxygen; F:heme binding; P:oxidation-reduction process
genemark-Pseudochromosome_1-processed-gene-11.87	related to FMP35 Found in Mitochondrial Proteome	215	6.2573E-154					IPR014807 (PFAM); PTHR28523 (PANTHER); TRANSMEMBRANE (PHOBIUS); CYTOPLASMIC_DOMAIN (PHOBIUS); NON_CYTOPLASMIC_DOMAIN (PHOBIUS)	no GO terms	no GO terms
snap_masked-Pseudochromosome_1-processed-gene-2.53	uncharacterized protein FMAN_00044	338	0.0					mobidb-lite (MOBIDB_LITE); mobidb-lite (MOBIDB_LITE); mobidb-lite (MOBIDB_LITE); mobidb-lite (MOBIDB_LITE); mobidb-lite (MOBIDB_LITE); mobidb-lite (MOBIDB_LITE)	no GO terms	no GO terms
genemark-Pseudochromosome_1-processed-gene-16.64	related to TRK1-Potassium transporter I	763	0.0	C:GO:0005886; F:GO:0022857; P:GO:0042592	C:plasma membrane; F:transmembrane transporter activity; P:homeostatic process			IPR003445 (PFAM); IPR015958 (PIRSF); mobidb-lite (MOBIDB_LITE); mobidb-lite (MOBIDB_LITE); mobidb-lite (MOBIDB_LITE); mobidb-lite (MOBIDB_LITE); PTHR31064 (PANTHER); PTHR31064:SF21 (PANTHER); CYTOPLASMIC_DOMAIN (PHOBIUS); TRANSMEMBRANE (PHOBIUS); NON_CYTOPLASMIC_DOMAIN (PHOBIUS); NON_CYTOPLASMIC_DOMAIN (PHOBIUS); NON_CYTOPLASMIC_DOMAIN (PHOBIUS); CYTOPLASMIC_DOMAIN (PHOBIUS); NON_CYTOPLASMIC_DOMA…	C:GO:0005887; P:GO:0006812; F:GO:0008324; F:GO:0015079; P:GO:0030007; P:GO:0055085; P:GO:0071805	C:integral component of plasma membrane; P:cation transport; F:cation transmembrane transporter activity; F:potassium ion transmembrane transporter activity; P:cellular potassium ion homeostasis; P:transmembrane transport; P:potassium ion transmembrane transport
genemark-Pseudochromosome_1-processed-gene-14.3	Latex clearing protein	484	0.0	C:GO:0005575	C:cellular_component			IPR018713 (PFAM); IPR037473 (PANTHER); NON_CYTOPLASMIC_DOMAIN (PHOBIUS); TRANSMEMBRANE (PHOBIUS); NON_CYTOPLASMIC_DOMAIN (PHOBIUS); TRANSMEMBRANE (PHOBIUS); CYTOPLASMIC_DOMAIN (PHOBIUS); TMhelix (TMHMM); TMhelix (TMHMM)	no GO terms	no GO terms
genemark-Pseudochromosome_1-processed-gene-15.69	related to nucleoporin-interacting protein NIC96	1160	0.0	F:GO:0005198; C:GO:0005635; P:GO:0006913; C:GO:0032991	F:structural molecule activity; C:nuclear envelope; P:nucleocytoplasmic transport; C:protein-containing complex			IPR025574 (PFAM); IPR007231 (PFAM); mobidb-lite (MOBIDB_LITE); mobidb-lite (MOBIDB_LITE); mobidb-lite (MOBIDB_LITE); mobidb-lite (MOBIDB_LITE); mobidb-lite (MOBIDB_LITE); mobidb-lite (MOBIDB_LITE); mobidb-lite (MOBIDB_LITE); IPR007231 (PANTHER)	C:GO:0005643; F:GO:0017056	C:nuclear pore; F:structural constituent of nuclear pore
genemark-Pseudochromosome_1-processed-gene-3.81	uncharacterized protein LW93_11213	591	0.0	C:GO:0005575	C:cellular_component			TRANSMEMBRANE (PHOBIUS); TRANSMEMBRANE (PHOBIUS); CYTOPLASMIC_DOMAIN (PHOBIUS); TRANSMEMBRANE (PHOBIUS); CYTOPLASMIC_DOMAIN (PHOBIUS); TRANSMEMBRANE (PHOBIUS); NON_CYTOPLASMIC_DOMAIN (PHOBIUS); TRANSMEMBRANE (PHOBIUS); CYTOPLASMIC_DOMAIN (PHOBIUS); CYTOPLASMIC_DOMAIN (PHOBIUS); NON_CYTOPLASMIC_DOMAIN (PHOBIUS); TRANSMEMBRANE (PHOBIUS); NON_CYTOPLASMIC_DOMAIN (PHOBIUS); TRANSMEMBRANE (PHOBIUS); NO…	no GO terms	no GO terms
genemark-Pseudochromosome_1-processed-gene-9.18	hypothetical protein FOYG_16414	62	9.96069E-22					no IPS match	no IPS match	no IPS match
genemark-Pseudochromosome_1-processed-gene-11.95	uncharacterized protein FFB14_11806	314	8.12306E-161					mobidb-lite (MOBIDB_LITE); mobidb-lite (MOBIDB_LITE); mobidb-lite (MOBIDB_LITE); mobidb-lite (MOBIDB_LITE)	no GO terms	no GO terms
snap_masked-Pseudochromosome_1-processed-gene-2.23	probable monoamine oxidase N	375	0.0	F:GO:0016491	F:oxidoreductase activity			G3DSA:3.90.660.10 (GENE3D); IPR036188 (G3DSA:3.50.50.GENE3D); IPR002937 (PFAM); PTHR10742 (PANTHER); PTHR10742:SF296 (PANTHER); IPR036188 (SUPERFAMILY)	F:GO:0016491; P:GO:0055114	F:oxidoreductase activity; P:oxidation-reduction process
genemark-Pseudochromosome_1-processed-gene-11.84	hypothetical protein FPRO05_04536	718	0.0					Coil (COILS); Coil (COILS); Coil (COILS); mobidb-lite (MOBIDB_LITE); mobidb-lite (MOBIDB_LITE); mobidb-lite (MOBIDB_LITE); mobidb-lite (MOBIDB_LITE); mobidb-lite (MOBIDB_LITE); mobidb-lite (MOBIDB_LITE); mobidb-lite (MOBIDB_LITE); mobidb-lite (MOBIDB_LITE); mobidb-lite (MOBIDB_LITE); mobidb-lite (MOBIDB_LITE); mobidb-lite (MOBIDB_LITE)	no GO terms	no GO terms
genemark-Pseudochromosome_1-processed-gene-2.97	related to nicotinamide mononucleotide permease	489	0.0	C:GO:0005575; P:GO:0055085	C:cellular_component; P:transmembrane transport			IPR011701 (PFAM); G3DSA:1.20.1250.20 (GENE3D); G3DSA:1.20.1250.20 (GENE3D); PTHR43791 (PANTHER); PTHR43791:SF68 (PANTHER); TRANSMEMBRANE (PHOBIUS); CYTOPLASMIC_DOMAIN (PHOBIUS); CYTOPLASMIC_DOMAIN (PHOBIUS); TRANSMEMBRANE (PHOBIUS); CYTOPLASMIC_DOMAIN (PHOBIUS); CYTOPLASMIC_DOMAIN (PHOBIUS); CYTOPLASMIC_DOMAIN (PHOBIUS); TRANSMEMBRANE (PHOBIUS); CYTOPLASMIC_DOMAIN (PHOBIUS); NON_CYTOPLASMIC_DOMAI…	C:GO:0016021; P:GO:0055085	C:integral component of membrane; P:transmembrane transport
genemark-Pseudochromosome_1-processed-gene-14.6	related to TAD3 Subunit of tRNA-specific adenosine-34 deaminase	435	0.0	F:GO:0003674	F:molecular_function			IPR002125 (PFAM); mobidb-lite (MOBIDB_LITE); mobidb-lite (MOBIDB_LITE); PTHR44418 (PANTHER); IPR002125 (PROSITE_PROFILES); cd01285 (CDD); IPR016193 (SUPERFAMILY)	F:GO:0003824	F:catalytic activity
genemark-Pseudochromosome_1-processed-gene-8.1	DnaJ like subfamily B member 12	362	0.0	C:GO:0005575; P:GO:0006464; F:GO:0008233	C:cellular_component; P:cellular protein modification process; F:peptidase activity	EC:3.4.19.12	Ubiquitinyl hydrolase 1	IPR001623 (PRINTS); IPR001623 (SMART); IPR036869 (G3DSA:1.10.287.GENE3D); IPR015399 (PFAM); IPR001623 (PFAM); mobidb-lite (MOBIDB_LITE); PTHR43908 (PANTHER); PTHR43908:SF3 (PANTHER); NON_CYTOPLASMIC_DOMAIN (PHOBIUS); TRANSMEMBRANE (PHOBIUS); CYTOPLASMIC_DOMAIN (PHOBIUS); IPR001623 (PROSITE_PROFILES); IPR001623 (CDD); IPR036869 (SUPERFAMILY); TMhelix (TMHMM)	no GO terms	no GO terms
snap_masked-Pseudochromosome_1-processed-gene-4.97	oxidoreductase	323	0.0					IPR018535 (PFAM); mobidb-lite (MOBIDB_LITE); PTHR32208 (PANTHER); PTHR32208:SF30 (PANTHER); SIGNAL_PEPTIDE_N_REGION (PHOBIUS); NON_CYTOPLASMIC_DOMAIN (PHOBIUS); SIGNAL_PEPTIDE_H_REGION (PHOBIUS); SIGNAL_PEPTIDE (PHOBIUS); SIGNAL_PEPTIDE_C_REGION (PHOBIUS); SignalP-noTM (SIGNALP_GRAM_NEGATIVE); SignalP-noTM (SIGNALP_EUK); SignalP-TM (SIGNALP_GRAM_POSITIVE)	no GO terms	no GO terms
maker-Pseudochromosome_1-snap-gene-6.14	hypothetical protein FPRO05_04403	1664	0.0	F:GO:0003674	F:molecular_function			Coil (COILS); IPR013078 (SMART); IPR029033 (G3DSA:3.40.50.GENE3D); IPR022124 (PFAM); IPR013078 (PFAM); mobidb-lite (MOBIDB_LITE); mobidb-lite (MOBIDB_LITE); mobidb-lite (MOBIDB_LITE); mobidb-lite (MOBIDB_LITE); mobidb-lite (MOBIDB_LITE); mobidb-lite (MOBIDB_LITE); mobidb-lite (MOBIDB_LITE); mobidb-lite (MOBIDB_LITE); mobidb-lite (MOBIDB_LITE); mobidb-lite (MOBIDB_LITE); mobidb-lite (MOBIDB_LITE);…	no GO terms	no GO terms
snap_masked-Pseudochromosome_1-processed-gene-10.37	related to traf5 protein	529	0.0	F:GO:0043167	F:ion binding			Coil (COILS); IPR001841 (SMART); IPR018957 (PFAM); IPR001293 (PFAM); IPR013083 (G3DSA:3.30.40.GENE3D); mobidb-lite (MOBIDB_LITE); mobidb-lite (MOBIDB_LITE); mobidb-lite (MOBIDB_LITE); PTHR10131 (PANTHER); IPR001293 (PROSITE_PROFILES); IPR001841 (PROSITE_PROFILES); SSF57850 (SUPERFAMILY); IPR008974 (SUPERFAMILY)	F:GO:0005515; F:GO:0008270; F:GO:0046872	F:protein binding; F:zinc ion binding; F:metal ion binding
maker-Pseudochromosome_1-snap-gene-7.5	uncharacterized protein FPRO_00265	224	1.22192E-77	F:GO:0003674	F:molecular_function			IPR036047 (SUPERFAMILY)	F:GO:0005515	F:protein binding
genemark-Pseudochromosome_1-processed-gene-6.99	transcription factor	207	1.1443E-146	F:GO:0003700; C:GO:0005634; P:GO:0009058; P:GO:0034641; F:GO:0043167	F:DNA-binding transcription factor activity; C:nucleus; P:biosynthetic process; P:cellular nitrogen compound metabolic process; F:ion binding			IPR001138 (SMART); IPR001138 (PFAM); IPR036864 (G3DSA:4.10.240.GENE3D); mobidb-lite (MOBIDB_LITE); mobidb-lite (MOBIDB_LITE); mobidb-lite (MOBIDB_LITE); PTHR31313 (PANTHER); PTHR31313:SF25 (PANTHER); IPR001138 (PROSITE_PROFILES); IPR001138 (CDD); IPR036864 (SUPERFAMILY)	F:GO:0000981; C:GO:0005634; P:GO:0006355; F:GO:0008270	F:DNA-binding transcription factor activity, RNA polymerase II-specific; C:nucleus; P:regulation of transcription, DNA-templated; F:zinc ion binding
genemark-Pseudochromosome_1-processed-gene-11.98	Putative serine-rich protein C11G7.01	441	0.0	C:GO:0005575	C:cellular_component			mobidb-lite (MOBIDB_LITE); mobidb-lite (MOBIDB_LITE); mobidb-lite (MOBIDB_LITE); mobidb-lite (MOBIDB_LITE); mobidb-lite (MOBIDB_LITE); mobidb-lite (MOBIDB_LITE); mobidb-lite (MOBIDB_LITE); mobidb-lite (MOBIDB_LITE); PTHR15549 (PANTHER); NON_CYTOPLASMIC_DOMAIN (PHOBIUS); CYTOPLASMIC_DOMAIN (PHOBIUS); TRANSMEMBRANE (PHOBIUS); TMhelix (TMHMM)	no GO terms	no GO terms
genemark-Pseudochromosome_1-processed-gene-3.72	ankyrin repeat protein	1082	0.0	F:GO:0003674	F:molecular_function			IPR002110 (SMART); IPR036770 (G3DSA:1.25.40.GENE3D); IPR020683 (PFAM); mobidb-lite (MOBIDB_LITE); mobidb-lite (MOBIDB_LITE); mobidb-lite (MOBIDB_LITE); mobidb-lite (MOBIDB_LITE); PTHR44206 (PANTHER); SIGNAL_PEPTIDE (PHOBIUS); CYTOPLASMIC_DOMAIN (PHOBIUS); SIGNAL_PEPTIDE_N_REGION (PHOBIUS); SIGNAL_PEPTIDE_C_REGION (PHOBIUS); TRANSMEMBRANE (PHOBIUS); NON_CYTOPLASMIC_DOMAIN (PHOBIUS); CYTOPLASMIC_DO…	F:GO:0005515	F:protein binding
snap_masked-Pseudochromosome_1-processed-gene-2.20	uncharacterized protein FMAN_00064	1248	0.0					mobidb-lite (MOBIDB_LITE); mobidb-lite (MOBIDB_LITE); mobidb-lite (MOBIDB_LITE); mobidb-lite (MOBIDB_LITE); mobidb-lite (MOBIDB_LITE); mobidb-lite (MOBIDB_LITE); mobidb-lite (MOBIDB_LITE); mobidb-lite (MOBIDB_LITE); mobidb-lite (MOBIDB_LITE); mobidb-lite (MOBIDB_LITE); mobidb-lite (MOBIDB_LITE); mobidb-lite (MOBIDB_LITE); mobidb-lite (MOBIDB_LITE); mobidb-lite (MOBIDB_LITE); NON_CYTOPLASMIC_DOMAI…	no GO terms	no GO terms
genemark-Pseudochromosome_1-processed-gene-1.53	FMS1-Protein involved in the biosynthesis of pantothenic acid	907	0.0	C:GO:0005575; F:GO:0016491; P:GO:0055085	C:cellular_component; F:oxidoreductase activity; P:transmembrane transport			IPR002937 (PFAM); G3DSA:3.90.660.10 (GENE3D); IPR036188 (G3DSA:3.50.50.GENE3D); PTHR10742:SF349 (PANTHER); PTHR10742 (PANTHER); SSF54373 (SUPERFAMILY); IPR036188 (SUPERFAMILY)	F:GO:0016491; P:GO:0055114	F:oxidoreductase activity; P:oxidation-reduction process
genemark-Pseudochromosome_1-processed-gene-1.42	hypothetical protein FVER14953_21269	123	2.69132E-77					IPR009799 (PFAM); IPR011008 (SUPERFAMILY)	no GO terms	no GO terms
genemark-Pseudochromosome_1-processed-gene-3.83	uncharacterized protein FMAN_06789	172	2.17425E-44	C:GO:0005575	C:cellular_component			CYTOPLASMIC_DOMAIN (PHOBIUS); TRANSMEMBRANE (PHOBIUS); TRANSMEMBRANE (PHOBIUS); NON_CYTOPLASMIC_DOMAIN (PHOBIUS); CYTOPLASMIC_DOMAIN (PHOBIUS); TMhelix (TMHMM); TMhelix (TMHMM)	no GO terms	no GO terms
snap_masked-Pseudochromosome_1-processed-gene-12.54	60S ribosomal protein L20	180	4.06988E-130	F:GO:0003735; C:GO:0005840; P:GO:0006412	F:structural constituent of ribosome; C:ribosome; P:translation			G3DSA:3.10.20.10 (GENE3D); G3DSA:3.10.20.10 (GENE3D); IPR021138 (PIRSF); IPR023573 (PFAM); IPR028877 (PANTHER); PTHR10052:SF1 (PANTHER); IPR028877 (HAMAP); SSF160374 (SUPERFAMILY)	F:GO:0003735; C:GO:0005840; P:GO:0006412	F:structural constituent of ribosome; C:ribosome; P:translation
genemark-Pseudochromosome_1-processed-gene-15.89	myosin-1	1227	0.0	C:GO:0005856; F:GO:0008092; C:GO:0032991; F:GO:0043167	C:cytoskeleton; F:cytoskeletal protein binding; C:protein-containing complex; F:ion binding	EC:3.6.1.15	Nucleoside-triphosphate phosphatase	IPR001609 (PRINTS); IPR001609 (SMART); IPR001452 (SMART); G3DSA:3.30.70.3240 (GENE3D); IPR036961 (G3DSA:3.40.850.GENE3D); IPR010926 (PFAM); G3DSA:2.30.30.40 (GENE3D); IPR001609 (PFAM); IPR001452 (PFAM); G3DSA:1.20.58.530 (GENE3D); G3DSA:1.10.10.820 (GENE3D); G3DSA:1.20.120.720 (GENE3D); mobidb-lite (MOBIDB_LITE); mobidb-lite (MOBIDB_LITE); mobidb-lite (MOBIDB_LITE); mobidb-lite (MOBIDB_LITE); mob…	F:GO:0003774; F:GO:0005515; F:GO:0005524; C:GO:0016459	F:motor activity; F:protein binding; F:ATP binding; C:myosin complex
genemark-Pseudochromosome_1-processed-gene-5.33	hypothetical protein FNYG_08806	520	0.0	C:GO:0005575; F:GO:0008233	C:cellular_component; F:peptidase activity	EC:3.4.23	Acting on peptide bonds (peptidases)	IPR021109 (G3DSA:2.40.70.GENE3D); IPR033121 (PFAM); IPR021109 (G3DSA:2.40.70.GENE3D); mobidb-lite (MOBIDB_LITE); mobidb-lite (MOBIDB_LITE); SIGNAL_PEPTIDE_C_REGION (PHOBIUS); CYTOPLASMIC_DOMAIN (PHOBIUS); SIGNAL_PEPTIDE (PHOBIUS); SIGNAL_PEPTIDE_H_REGION (PHOBIUS); NON_CYTOPLASMIC_DOMAIN (PHOBIUS); TRANSMEMBRANE (PHOBIUS); SIGNAL_PEPTIDE_N_REGION (PHOBIUS); IPR033121 (PROSITE_PROFILES); SignalP-n…	no GO terms	no GO terms
genemark-Pseudochromosome_1-processed-gene-15.67	hypothetical protein FOPG_01258	818	0.0					mobidb-lite (MOBIDB_LITE); mobidb-lite (MOBIDB_LITE); mobidb-lite (MOBIDB_LITE); mobidb-lite (MOBIDB_LITE); mobidb-lite (MOBIDB_LITE); PTHR42345:SF1 (PANTHER); PTHR42345 (PANTHER)	no GO terms	no GO terms
snap_masked-Pseudochromosome_1-processed-gene-7.66	F-box domain-containing protein	579	0.0	F:GO:0003674	F:molecular_function			PTHR42057 (PANTHER); IPR001810 (PROSITE_PROFILES)	F:GO:0005515	F:protein binding
snap_masked-Pseudochromosome_1-processed-gene-1.89	-No description-	85						no IPS match	no IPS match	no IPS match
snap_masked-Pseudochromosome_1-processed-gene-14.39	related to ribonuclease H1	433	0.0	F:GO:0004518; F:GO:0043167	F:nuclease activity; F:ion binding	EC:3.1.30; EC:3.1.26; EC:3.1.26.4	Acting on ester bonds; Acting on ester bonds; Ribonuclease H	IPR002156 (PFAM); IPR011320 (PFAM); IPR037056 (G3DSA:3.40.970.GENE3D); IPR036397 (G3DSA:3.30.420.GENE3D); mobidb-lite (MOBIDB_LITE); mobidb-lite (MOBIDB_LITE); mobidb-lite (MOBIDB_LITE); PTHR10642:SF0 (PANTHER); PTHR10642 (PANTHER); IPR002156 (PROSITE_PROFILES); cd09280 (CDD); IPR012337 (SUPERFAMILY); IPR009027 (SUPERFAMILY); IPR009027 (SUPERFAMILY)	F:GO:0003676; F:GO:0004523	F:nucleic acid binding; F:RNA-DNA hybrid ribonuclease activity
genemark-Pseudochromosome_1-processed-gene-6.113	2-hydroxy-6-oxononadienedioate/2-hydroxy-6- oxononatrienedioate hydrolase	296	0.0	F:GO:0003674	F:molecular_function			IPR000073 (PRINTS); IPR000073 (PFAM); IPR029058 (G3DSA:3.40.50.GENE3D); PTHR43798 (PANTHER); PTHR43798:SF11 (PANTHER); IPR029058 (SUPERFAMILY)	no GO terms	no GO terms
genemark-Pseudochromosome_1-processed-gene-6.118	related to tyrosine-protein phosphatase SIW14	310	0.0	C:GO:0005575; P:GO:0006464; F:GO:0016791	C:cellular_component; P:cellular protein modification process; F:phosphatase activity	EC:3.1.3.16; EC:3.1.3.48	Protein-serine/threonine phosphatase; Protein-tyrosine-phosphatase	IPR029021 (G3DSA:3.90.190.GENE3D); IPR004861 (PFAM); mobidb-lite (MOBIDB_LITE); mobidb-lite (MOBIDB_LITE); mobidb-lite (MOBIDB_LITE); PTHR31126:SF0 (PANTHER); PTHR31126 (PANTHER); CYTOPLASMIC_DOMAIN (PHOBIUS); TRANSMEMBRANE (PHOBIUS); NON_CYTOPLASMIC_DOMAIN (PHOBIUS); IPR029021 (SUPERFAMILY); TMhelix (TMHMM)	no GO terms	no GO terms
genemark-Pseudochromosome_1-processed-gene-12.39	glutathione-dependent formaldehyde-activating	174	1.39943E-125	F:GO:0016829	F:lyase activity			IPR006913 (PFAM); G3DSA:2.170.150.70 (GENE3D); mobidb-lite (MOBIDB_LITE); mobidb-lite (MOBIDB_LITE); PTHR33337:SF3 (PANTHER); PTHR33337 (PANTHER); IPR011057 (SUPERFAMILY)	F:GO:0016846	F:carbon-sulfur lyase activity
genemark-Pseudochromosome_1-processed-gene-7.30	Transcriptional regulatory protein pro-1	652	0.0	F:GO:0003700; C:GO:0005634; P:GO:0009058; P:GO:0034641; F:GO:0043167	F:DNA-binding transcription factor activity; C:nucleus; P:biosynthetic process; P:cellular nitrogen compound metabolic process; F:ion binding			IPR001138 (SMART); IPR036864 (G3DSA:4.10.240.GENE3D); IPR021858 (PFAM); IPR001138 (PFAM); mobidb-lite (MOBIDB_LITE); mobidb-lite (MOBIDB_LITE); mobidb-lite (MOBIDB_LITE); PTHR37534 (PANTHER); IPR001138 (PROSITE_PROFILES); cd12148 (CDD); IPR001138 (CDD); IPR036864 (SUPERFAMILY)	F:GO:0000981; C:GO:0005634; P:GO:0006355; F:GO:0008270	F:DNA-binding transcription factor activity, RNA polymerase II-specific; C:nucleus; P:regulation of transcription, DNA-templated; F:zinc ion binding
genemark-Pseudochromosome_1-processed-gene-9.8	Ankyrin repeat domain-containing protein 23	726	0.0	F:GO:0003674	F:molecular_function			IPR002110 (SMART); IPR036770 (G3DSA:1.25.40.GENE3D); IPR020683 (PFAM); IPR036770 (G3DSA:1.25.40.GENE3D); mobidb-lite (MOBIDB_LITE); mobidb-lite (MOBIDB_LITE); mobidb-lite (MOBIDB_LITE); PTHR44181 (PANTHER); IPR002110 (PROSITE_PROFILES); IPR020683 (PROSITE_PROFILES); IPR002110 (PROSITE_PROFILES); IPR020683 (CDD); IPR020683 (CDD); IPR036770 (SUPERFAMILY); IPR036770 (SUPERFAMILY)	F:GO:0005515	F:protein binding
snap_masked-Pseudochromosome_1-processed-gene-11.59	related to arginase	302	0.0	F:GO:0043167	F:ion binding			IPR006035 (PRINTS); IPR006035 (PFAM); G3DSA:3.40.800.10 (GENE3D); PTHR43782:SF3 (PANTHER); PTHR43782 (PANTHER); IPR006035 (PROSITE_PROFILES); cd09999 (CDD); IPR023696 (SUPERFAMILY)	F:GO:0046872	F:metal ion binding
genemark-Pseudochromosome_1-processed-gene-7.29	related to pathway-specific nitrogen regulator	968	0.0	F:GO:0003677; F:GO:0003700; C:GO:0005634; P:GO:0009058; P:GO:0034641; F:GO:0043167	F:DNA binding; F:DNA-binding transcription factor activity; C:nucleus; P:biosynthetic process; P:cellular nitrogen compound metabolic process; F:ion binding			IPR007219 (SMART); IPR007219 (PFAM); mobidb-lite (MOBIDB_LITE); mobidb-lite (MOBIDB_LITE); mobidb-lite (MOBIDB_LITE); mobidb-lite (MOBIDB_LITE); mobidb-lite (MOBIDB_LITE); mobidb-lite (MOBIDB_LITE); mobidb-lite (MOBIDB_LITE); mobidb-lite (MOBIDB_LITE); mobidb-lite (MOBIDB_LITE); mobidb-lite (MOBIDB_LITE); mobidb-lite (MOBIDB_LITE); mobidb-lite (MOBIDB_LITE); PTHR31944 (PANTHER); PTHR31944:SF118 (…	F:GO:0000981; F:GO:0003677; C:GO:0005634; P:GO:0006351; P:GO:0006355; F:GO:0008270	F:DNA-binding transcription factor activity, RNA polymerase II-specific; F:DNA binding; C:nucleus; P:transcription, DNA-templated; P:regulation of transcription, DNA-templated; F:zinc ion binding
genemark-Pseudochromosome_1-processed-gene-6.107	elongator complex protein 1	136	6.11235E-52	C:GO:0005575; P:GO:0006091; F:GO:0016491; F:GO:0022857	C:cellular_component; P:generation of precursor metabolites and energy; F:oxidoreductase activity; F:transmembrane transporter activity	EC:1.9.3.1	Cytochrome-c oxidase	IPR004202 (PFAM); mobidb-lite (MOBIDB_LITE); IPR004202 (PANTHER); TRANSMEMBRANE (PHOBIUS); CYTOPLASMIC_DOMAIN (PHOBIUS); NON_CYTOPLASMIC_DOMAIN (PHOBIUS); IPR036636 (SUPERFAMILY); TMhelix (TMHMM)	F:GO:0004129	F:cytochrome-c oxidase activity
genemark-Pseudochromosome_1-processed-gene-6.124	beta-1,4-N-acetylglucosaminyltransferase	284	0.0	C:GO:0005737; C:GO:0005783; P:GO:0006464; P:GO:0006629; P:GO:0009058; F:GO:0016757	C:cytoplasm; C:endoplasmic reticulum; P:cellular protein modification process; P:lipid metabolic process; P:biosynthetic process; F:transferase activity, transferring glycosyl groups			IPR013969 (PFAM); IPR013969 (PANTHER); SIGNAL_PEPTIDE_N_REGION (PHOBIUS); SIGNAL_PEPTIDE (PHOBIUS); CYTOPLASMIC_DOMAIN (PHOBIUS); NON_CYTOPLASMIC_DOMAIN (PHOBIUS); TRANSMEMBRANE (PHOBIUS); CYTOPLASMIC_DOMAIN (PHOBIUS); NON_CYTOPLASMIC_DOMAIN (PHOBIUS); SIGNAL_PEPTIDE_H_REGION (PHOBIUS); SIGNAL_PEPTIDE_C_REGION (PHOBIUS); TRANSMEMBRANE (PHOBIUS); TRANSMEMBRANE (PHOBIUS); TMhelix (TMHMM); TMhelix (…	P:GO:0006488	P:dolichol-linked oligosaccharide biosynthetic process
snap_masked-Pseudochromosome_1-processed-gene-8.66	probable pectin lyase precursor	375	0.0	C:GO:0005576; P:GO:0005975; P:GO:0009056; F:GO:0016829	C:extracellular region; P:carbohydrate metabolic process; P:catabolic process; F:lyase activity			IPR002022 (SMART); IPR012334 (G3DSA:2.160.20.GENE3D); IPR002022 (PFAM); PTHR31683:SF16 (PANTHER); PTHR31683 (PANTHER); SIGNAL_PEPTIDE_N_REGION (PHOBIUS); NON_CYTOPLASMIC_DOMAIN (PHOBIUS); SIGNAL_PEPTIDE_C_REGION (PHOBIUS); SIGNAL_PEPTIDE_H_REGION (PHOBIUS); SIGNAL_PEPTIDE (PHOBIUS); SignalP-noTM (SIGNALP_EUK); SignalP-noTM (SIGNALP_GRAM_NEGATIVE); SignalP-TM (SIGNALP_GRAM_POSITIVE); IPR011050 (SU…	no GO terms	no GO terms
genemark-Pseudochromosome_1-processed-gene-13.9	hypothetical protein FOYG_16304	417	0.0	C:GO:0005575	C:cellular_component			mobidb-lite (MOBIDB_LITE); mobidb-lite (MOBIDB_LITE); mobidb-lite (MOBIDB_LITE); mobidb-lite (MOBIDB_LITE); mobidb-lite (MOBIDB_LITE); mobidb-lite (MOBIDB_LITE); mobidb-lite (MOBIDB_LITE); mobidb-lite (MOBIDB_LITE); TRANSMEMBRANE (PHOBIUS); CYTOPLASMIC_DOMAIN (PHOBIUS); NON_CYTOPLASMIC_DOMAIN (PHOBIUS); cd12087 (CDD); TMhelix (TMHMM)	no GO terms	no GO terms
snap_masked-Pseudochromosome_1-processed-gene-15.39	hypothetical protein FCULG_00004147	573	3.32792E-148	C:GO:0005575	C:cellular_component			mobidb-lite (MOBIDB_LITE); mobidb-lite (MOBIDB_LITE); mobidb-lite (MOBIDB_LITE); mobidb-lite (MOBIDB_LITE); mobidb-lite (MOBIDB_LITE); mobidb-lite (MOBIDB_LITE); mobidb-lite (MOBIDB_LITE); SignalP-noTM (SIGNALP_EUK); SignalP-TM (SIGNALP_GRAM_POSITIVE)	no GO terms	no GO terms
genemark-Pseudochromosome_1-processed-gene-12.28	related to ACOB protein	275	0.0					Coil (COILS); Coil (COILS); SM00753 (SMART); IPR000717 (SMART); G3DSA:1.25.40.570 (GENE3D); IPR000717 (PFAM); mobidb-lite (MOBIDB_LITE); PTHR15350 (PANTHER); PTHR15350:SF5 (PANTHER); IPR000717 (PROSITE_PROFILES)	no GO terms	no GO terms
snap_masked-Pseudochromosome_1-processed-gene-0.0	putative alcohol dehydrogenase	103	1.19039E-18	C:GO:0005575; F:GO:0016491; P:GO:0055114	C:cellular_component; F:oxidoreductase activity; P:oxidation-reduction process			no IPS match	no IPS match	no IPS match
maker-Pseudochromosome_1-augustus-gene-5.104	uncharacterized protein FMAN_00192	391	0.0	C:GO:0005575	C:cellular_component			CYTOPLASMIC_DOMAIN (PHOBIUS); TRANSMEMBRANE (PHOBIUS); NON_CYTOPLASMIC_DOMAIN (PHOBIUS); TMhelix (TMHMM)	no GO terms	no GO terms
snap_masked-Pseudochromosome_1-processed-gene-5.81	-No description-	105						no IPS match	no IPS match	no IPS match
snap_masked-Pseudochromosome_1-processed-gene-6.44	related to WSS1 Protein involved in sister chromatid separation and segregation	349	0.0	F:GO:0008233	F:peptidase activity			Coil (COILS); G3DSA:3.10.20.90 (GENE3D); IPR013536 (PFAM); mobidb-lite (MOBIDB_LITE); mobidb-lite (MOBIDB_LITE); mobidb-lite (MOBIDB_LITE); mobidb-lite (MOBIDB_LITE); PTHR23153:SF36 (PANTHER); PTHR23153 (PANTHER); IPR013536 (PROSITE_PROFILES); IPR029071 (SUPERFAMILY)	no GO terms	no GO terms
genemark-Pseudochromosome_1-processed-gene-6.92	hypothetical protein FPRO05_04404	483	0.0					IPR022124 (PFAM); mobidb-lite (MOBIDB_LITE); mobidb-lite (MOBIDB_LITE); mobidb-lite (MOBIDB_LITE); mobidb-lite (MOBIDB_LITE); mobidb-lite (MOBIDB_LITE); mobidb-lite (MOBIDB_LITE); mobidb-lite (MOBIDB_LITE); mobidb-lite (MOBIDB_LITE); mobidb-lite (MOBIDB_LITE); mobidb-lite (MOBIDB_LITE); mobidb-lite (MOBIDB_LITE); PTHR35587 (PANTHER)	no GO terms	no GO terms
maker-Pseudochromosome_1-snap-gene-11.8	PITH domain-containing protein P35G2.02	1657	0.0	F:GO:0003735; C:GO:0005840; P:GO:0006412	F:structural constituent of ribosome; C:ribosome; P:translation			Coil (COILS); Coil (COILS); IPR019350 (PFAM); IPR037047 (G3DSA:2.60.120.GENE3D); IPR010400 (PFAM); IPR000597 (PFAM); G3DSA:2.40.50.620 (GENE3D); IPR019927 (TIGRFAM); G3DSA:2.40.30.10 (GENE3D); mobidb-lite (MOBIDB_LITE); mobidb-lite (MOBIDB_LITE); mobidb-lite (MOBIDB_LITE); mobidb-lite (MOBIDB_LITE); mobidb-lite (MOBIDB_LITE); mobidb-lite (MOBIDB_LITE); mobidb-lite (MOBIDB_LITE); mobidb-lite (MOBI…	F:GO:0003735; C:GO:0005622; C:GO:0005840; P:GO:0006412	F:structural constituent of ribosome; C:intracellular; C:ribosome; P:translation
maker-Pseudochromosome_1-snap-gene-2.0	uncharacterized protein FPRO_00075	521	0.0	F:GO:0003676	F:nucleic acid binding			IPR027796 (PFAM); PTHR42037 (PANTHER)	no GO terms	no GO terms
snap_masked-Pseudochromosome_1-processed-gene-15.48	-No description-	84						no IPS match	no IPS match	no IPS match
genemark-Pseudochromosome_1-processed-gene-15.86	related to USO1-intracellular protein transport protein	772	0.0					Coil (COILS); Coil (COILS); Coil (COILS); Coil (COILS); Coil (COILS); Coil (COILS); Coil (COILS); Coil (COILS); mobidb-lite (MOBIDB_LITE); mobidb-lite (MOBIDB_LITE); mobidb-lite (MOBIDB_LITE); mobidb-lite (MOBIDB_LITE); mobidb-lite (MOBIDB_LITE); mobidb-lite (MOBIDB_LITE); mobidb-lite (MOBIDB_LITE); mobidb-lite (MOBIDB_LITE); mobidb-lite (MOBIDB_LITE); mobidb-lite (MOBIDB_LITE); mobidb-lite (MOBI…	no GO terms	no GO terms
genemark-Pseudochromosome_1-processed-gene-16.66	DNA polymerase kappa subunit	640	0.0	F:GO:0003677; P:GO:0006259; P:GO:0006950; P:GO:0009058; F:GO:0016779	F:DNA binding; P:DNA metabolic process; P:response to stress; P:biosynthetic process; F:nucleotidyltransferase activity	EC:2.7.7.7	DNA-directed DNA polymerase	Coil (COILS); Coil (COILS); IPR006642 (SMART); IPR036775 (G3DSA:3.30.1490.GENE3D); G3DSA:2.30.40.20 (GENE3D); IPR017961 (PFAM); G3DSA:1.10.150.810 (GENE3D); IPR001126 (PFAM); G3DSA:3.30.70.270 (GENE3D); mobidb-lite (MOBIDB_LITE); mobidb-lite (MOBIDB_LITE); mobidb-lite (MOBIDB_LITE); mobidb-lite (MOBIDB_LITE); mobidb-lite (MOBIDB_LITE); mobidb-lite (MOBIDB_LITE); mobidb-lite (MOBIDB_LITE); PTHR110…	F:GO:0003677; F:GO:0003684; F:GO:0003887; P:GO:0006281	F:DNA binding; F:damaged DNA binding; F:DNA-directed DNA polymerase activity; P:DNA repair
maker-Pseudochromosome_1-snap-gene-1.1	transferase family protein	1172	0.0	C:GO:0005575; F:GO:0016746	C:cellular_component; F:transferase activity, transferring acyl groups			IPR036736 (G3DSA:1.10.1200.GENE3D); G3DSA:3.40.50.12780 (GENE3D); IPR003480 (PFAM); IPR000873 (PFAM); IPR023213 (G3DSA:3.30.559.GENE3D); PTHR43201 (PANTHER); PTHR43201:SF3 (PANTHER); SSF56801 (SUPERFAMILY)	F:GO:0003824; F:GO:0016747	F:catalytic activity; F:transferase activity, transferring acyl groups other than amino-acyl groups
genemark-Pseudochromosome_1-processed-gene-13.11	probable DUF866 domain protein	160	5.56971E-115					IPR008584 (PFAM); IPR008584 (PANTHER); SSF141678 (SUPERFAMILY)	no GO terms	no GO terms
genemark-Pseudochromosome_1-processed-gene-9.16	related to putative multidrug transporter Mfs1.1 (major facilitator family protein)	578	0.0	C:GO:0005575; P:GO:0055085	C:cellular_component; P:transmembrane transport			PR01036 (PRINTS); G3DSA:1.20.1250.20 (GENE3D); G3DSA:1.20.1720.10 (GENE3D); IPR011701 (PFAM); mobidb-lite (MOBIDB_LITE); mobidb-lite (MOBIDB_LITE); PTHR23501:SF102 (PANTHER); PTHR23501 (PANTHER); TRANSMEMBRANE (PHOBIUS); NON_CYTOPLASMIC_DOMAIN (PHOBIUS); TRANSMEMBRANE (PHOBIUS); CYTOPLASMIC_DOMAIN (PHOBIUS); CYTOPLASMIC_DOMAIN (PHOBIUS); TRANSMEMBRANE (PHOBIUS); CYTOPLASMIC_DOMAIN (PHOBIUS); TRAN…	C:GO:0016021; P:GO:0055085	C:integral component of membrane; P:transmembrane transport
maker-Pseudochromosome_1-snap-gene-14.80	uncharacterized protein FPRO_00472	266	1.26926E-136					NON_CYTOPLASMIC_DOMAIN (PHOBIUS); SIGNAL_PEPTIDE_N_REGION (PHOBIUS); SIGNAL_PEPTIDE_H_REGION (PHOBIUS); SIGNAL_PEPTIDE (PHOBIUS); SIGNAL_PEPTIDE_C_REGION (PHOBIUS)	no GO terms	no GO terms
snap_masked-Pseudochromosome_1-processed-gene-4.81	hydrophobin 1	146	1.67545E-23					mobidb-lite (MOBIDB_LITE); mobidb-lite (MOBIDB_LITE); SIGNAL_PEPTIDE (PHOBIUS); SIGNAL_PEPTIDE_C_REGION (PHOBIUS); NON_CYTOPLASMIC_DOMAIN (PHOBIUS); SIGNAL_PEPTIDE_N_REGION (PHOBIUS); SIGNAL_PEPTIDE_H_REGION (PHOBIUS); SignalP-noTM (SIGNALP_GRAM_NEGATIVE); SignalP-noTM (SIGNALP_EUK); SignalP-TM (SIGNALP_GRAM_POSITIVE)	no GO terms	no GO terms
genemark-Pseudochromosome_1-processed-gene-14.13	blocked early in transport 1	174	3.33743E-124	C:GO:0005794; P:GO:0006810	C:Golgi apparatus; P:transport			IPR000727 (SMART); G3DSA:1.20.5.110 (GENE3D); mobidb-lite (MOBIDB_LITE); mobidb-lite (MOBIDB_LITE); PTHR12791:SF28 (PANTHER); IPR039897 (PANTHER); CYTOPLASMIC_DOMAIN (PHOBIUS); TRANSMEMBRANE (PHOBIUS); NON_CYTOPLASMIC_DOMAIN (PHOBIUS); IPR000727 (PROSITE_PROFILES); IPR039899 (CDD); SSF58038 (SUPERFAMILY); TMhelix (TMHMM)	P:GO:0015031; C:GO:0030173	P:protein transport; C:integral component of Golgi membrane
genemark-Pseudochromosome_1-processed-gene-2.95	related to cutinase transcription factor 1 beta	854	0.0	F:GO:0003677; F:GO:0003700; C:GO:0005634; P:GO:0009058; P:GO:0034641; F:GO:0043167	F:DNA binding; F:DNA-binding transcription factor activity; C:nucleus; P:biosynthetic process; P:cellular nitrogen compound metabolic process; F:ion binding			IPR001138 (SMART); IPR001138 (PFAM); IPR007219 (PFAM); IPR036864 (G3DSA:4.10.240.GENE3D); mobidb-lite (MOBIDB_LITE); mobidb-lite (MOBIDB_LITE); PTHR19444 (PANTHER); PTHR19444:SF21 (PANTHER); IPR001138 (PROSITE_PROFILES); IPR001138 (CDD); cd12148 (CDD); IPR036864 (SUPERFAMILY)	F:GO:0000981; F:GO:0003677; C:GO:0005634; P:GO:0006351; P:GO:0006355; F:GO:0008270	F:DNA-binding transcription factor activity, RNA polymerase II-specific; F:DNA binding; C:nucleus; P:transcription, DNA-templated; P:regulation of transcription, DNA-templated; F:zinc ion binding
genemark-Pseudochromosome_1-processed-gene-1.52	hypothetical protein FPRO05_04265	467	0.0	F:GO:0043167	F:ion binding			Coil (COILS); Coil (COILS); Coil (COILS); Coil (COILS); G3DSA:3.40.50.300 (GENE3D); IPR006073 (PFAM); mobidb-lite (MOBIDB_LITE); mobidb-lite (MOBIDB_LITE); IPR013087 (PROSITE_PROFILES); cd00882 (CDD); IPR027417 (SUPERFAMILY)	F:GO:0003676; F:GO:0005525	F:nucleic acid binding; F:GTP binding
snap_masked-Pseudochromosome_1-processed-gene-3.68	related to hsp70 protein	1476	0.0					Coil (COILS); Coil (COILS); Coil (COILS); mobidb-lite (MOBIDB_LITE); mobidb-lite (MOBIDB_LITE); mobidb-lite (MOBIDB_LITE); mobidb-lite (MOBIDB_LITE); mobidb-lite (MOBIDB_LITE); mobidb-lite (MOBIDB_LITE); IPR013126 (PANTHER); PTHR19375:SF191 (PANTHER); SSF53067 (SUPERFAMILY); SSF53067 (SUPERFAMILY)	no GO terms	no GO terms
genemark-Pseudochromosome_1-processed-gene-1.49	uncharacterized protein FMAN_00041	164	3.19373E-98					no IPS match	no IPS match	no IPS match
snap_masked-Pseudochromosome_1-processed-gene-2.47	hypothetical protein FOC1_g10004468	138	7.12525E-92					IPR006175 (PFAM); IPR035959 (G3DSA:3.30.1330.GENE3D); IPR006175 (PANTHER); IPR035959 (SUPERFAMILY)	no GO terms	no GO terms
genemark-Pseudochromosome_1-processed-gene-7.31	uncharacterized protein FPRN_00244	115	7.12257E-52					mobidb-lite (MOBIDB_LITE); mobidb-lite (MOBIDB_LITE)	no GO terms	no GO terms
snap_masked-Pseudochromosome_1-processed-gene-6.63	related to conserved membrane protein, putative	280	0.0	C:GO:0005575	C:cellular_component			G3DSA:3.10.20.90 (GENE3D); IPR025390 (PFAM); IPR019413 (PFAM); mobidb-lite (MOBIDB_LITE); mobidb-lite (MOBIDB_LITE); IPR039751 (PANTHER); IPR039751 (PANTHER); PTHR12943:SF36 (PANTHER); CYTOPLASMIC_DOMAIN (PHOBIUS); NON_CYTOPLASMIC_DOMAIN (PHOBIUS); NON_CYTOPLASMIC_DOMAIN (PHOBIUS); TRANSMEMBRANE (PHOBIUS); TRANSMEMBRANE (PHOBIUS); IPR029071 (SUPERFAMILY); TMhelix (TMHMM); TMhelix (TMHMM)	no GO terms	no GO terms
genemark-Pseudochromosome_1-processed-gene-11.89	mitotic-spindle organizing protein 1	70	1.9486E-42	C:GO:0005737; C:GO:0005815; P:GO:0008150; C:GO:0032991	C:cytoplasm; C:microtubule organizing center; P:biological_process; C:protein-containing complex			IPR022214 (PFAM); PTHR28520:SF2 (PANTHER); IPR022214 (PANTHER)	C:GO:0008274; P:GO:0033566	C:gamma-tubulin ring complex; P:gamma-tubulin complex localization
snap_masked-Pseudochromosome_1-processed-gene-8.86	uncharacterized protein Y057_8861	456	0.0					mobidb-lite (MOBIDB_LITE); mobidb-lite (MOBIDB_LITE); mobidb-lite (MOBIDB_LITE); mobidb-lite (MOBIDB_LITE); mobidb-lite (MOBIDB_LITE)	no GO terms	no GO terms
maker-Pseudochromosome_1-snap-gene-15.1	hypothetical protein FVEG_16604	154	1.71178E-36					no IPS match	no IPS match	no IPS match
genemark-Pseudochromosome_1-processed-gene-7.28	related to mannosyltransferase alg2	474	0.0	C:GO:0005575; P:GO:0006464; P:GO:0009058; F:GO:0016757	C:cellular_component; P:cellular protein modification process; P:biosynthetic process; F:transferase activity, transferring glycosyl groups	EC:2.4.1.132	GDP-Man:Man(1)GlcNAc(2)-PP-dolichol alpha-1,3-mannosyltransferase	G3DSA:3.40.50.2000 (GENE3D); IPR001296 (PFAM); G3DSA:3.40.50.2000 (GENE3D); IPR028098 (PFAM); PTHR12526:SF329 (PANTHER); PTHR12526 (PANTHER); TRANSMEMBRANE (PHOBIUS); CYTOPLASMIC_DOMAIN (PHOBIUS); TRANSMEMBRANE (PHOBIUS); NON_CYTOPLASMIC_DOMAIN (PHOBIUS); NON_CYTOPLASMIC_DOMAIN (PHOBIUS); IPR027054 (CDD); SSF53756 (SUPERFAMILY); TMhelix (TMHMM)	F:GO:0004378; P:GO:0006486	F:GDP-Man:Man1GlcNAc2-PP-Dol alpha-1,3-mannosyltransferase activity; P:protein glycosylation
maker-Pseudochromosome_1-snap-gene-9.89	hypothetical protein FNYG_08916	174	7.47675E-47					no IPS match	no IPS match	no IPS match
genemark-Pseudochromosome_1-processed-gene-5.30	hypothetical protein FNYG_08800	592	0.0					IPR007461 (PFAM); mobidb-lite (MOBIDB_LITE); mobidb-lite (MOBIDB_LITE); mobidb-lite (MOBIDB_LITE); mobidb-lite (MOBIDB_LITE); mobidb-lite (MOBIDB_LITE); mobidb-lite (MOBIDB_LITE); mobidb-lite (MOBIDB_LITE); mobidb-lite (MOBIDB_LITE); mobidb-lite (MOBIDB_LITE); mobidb-lite (MOBIDB_LITE); mobidb-lite (MOBIDB_LITE); mobidb-lite (MOBIDB_LITE); PTHR15629:SF8 (PANTHER); PTHR15629 (PANTHER)	no GO terms	no GO terms
snap_masked-Pseudochromosome_1-processed-gene-1.64	Transcription factor	591	4.3418E-170	F:GO:0003677; C:GO:0005634; P:GO:0009058; P:GO:0034641; F:GO:0043167	F:DNA binding; C:nucleus; P:biosynthetic process; P:cellular nitrogen compound metabolic process; F:ion binding			IPR007219 (SMART); IPR007219 (PFAM); mobidb-lite (MOBIDB_LITE); PTHR31313 (PANTHER); cd12148 (CDD)	F:GO:0003677; C:GO:0005634; P:GO:0006351; F:GO:0008270	F:DNA binding; C:nucleus; P:transcription, DNA-templated; F:zinc ion binding
genemark-Pseudochromosome_1-processed-gene-5.16	related to alpha-mannosidase	541	0.0	C:GO:0005575; P:GO:0008150; F:GO:0016798; F:GO:0043167	C:cellular_component; P:biological_process; F:hydrolase activity, acting on glycosyl bonds; F:ion binding	EC:3.2.1.113; EC:3.2.1.24	Mannosyl-oligosaccharide 1,2-alpha-mannosidase; Alpha-mannosidase	IPR001382 (PRINTS); IPR012341 (G3DSA:1.50.10.GENE3D); IPR001382 (PFAM); PTHR11742:SF47 (PANTHER); PTHR11742 (PANTHER); SIGNAL_PEPTIDE_N_REGION (PHOBIUS); SIGNAL_PEPTIDE_H_REGION (PHOBIUS); NON_CYTOPLASMIC_DOMAIN (PHOBIUS); SIGNAL_PEPTIDE_C_REGION (PHOBIUS); SIGNAL_PEPTIDE (PHOBIUS); SignalP-TM (SIGNALP_GRAM_POSITIVE); IPR036026 (SUPERFAMILY); TMhelix (TMHMM)	F:GO:0003824; F:GO:0004571; F:GO:0005509; C:GO:0016020	F:catalytic activity; F:mannosyl-oligosaccharide 1,2-alpha-mannosidase activity; F:calcium ion binding; C:membrane
maker-Pseudochromosome_1-augustus-gene-4.13	related to D-amino acid hydantoin hydrolase (hydantoinase)	1001	0.0	F:GO:0003674	F:molecular_function			IPR002821 (PFAM); IPR027479 (G3DSA:3.40.1610.GENE3D); IPR008040 (PFAM); IPR010318 (PFAM); PTHR11365:SF10 (PANTHER); PTHR11365 (PANTHER); SSF53067 (SUPERFAMILY); SSF53067 (SUPERFAMILY); SSF160991 (SUPERFAMILY)	F:GO:0016787	F:hydrolase activity
maker-Pseudochromosome_1-snap-gene-6.12	predicted protein [	246	6.80878E-117	F:GO:0000981; F:GO:0003677; C:GO:0005634; P:GO:0006351; P:GO:0006355; P:GO:0006357; F:GO:0008270; F:GO:0046872	F:DNA-binding transcription factor activity, RNA polymerase II-specific; F:DNA binding; C:nucleus; P:transcription, DNA-templated; P:regulation of transcription, DNA-templated; P:regulation of transcription by RNA polymerase II; F:zinc ion binding; F:metal ion binding			IPR008704 (PFAM); SSF54060 (SUPERFAMILY)	no GO terms	no GO terms
snap_masked-Pseudochromosome_1-processed-gene-8.73	tRNA (adenine-N(1)-)-methyltransferase non-catalytic subunit	192	3.16112E-137	C:GO:0005737; C:GO:0005856; P:GO:0007010; F:GO:0008092; F:GO:0008168; C:GO:0032991; P:GO:0065003	C:cytoplasm; C:cytoskeleton; P:cytoskeleton organization; F:cytoskeletal protein binding; F:methyltransferase activity; C:protein-containing complex; P:protein-containing complex assembly			IPR007204 (PFAM); IPR007204 (PIRSF); IPR036753 (G3DSA:1.10.1760.GENE3D); mobidb-lite (MOBIDB_LITE); IPR007204 (PANTHER); IPR036753 (SUPERFAMILY)	C:GO:0005856; C:GO:0005885; P:GO:0030833; P:GO:0034314	C:cytoskeleton; C:Arp2/3 protein complex; P:regulation of actin filament polymerization; P:Arp2/3 complex-mediated actin nucleation
snap_masked-Pseudochromosome_1-processed-gene-13.63	-No description-	71						no IPS match	no IPS match	no IPS match
maker-Pseudochromosome_1-snap-gene-2.3	hypothetical protein FOCG_11929	600	0.0	F:GO:0003674	F:molecular_function			IPR021858 (PFAM); mobidb-lite (MOBIDB_LITE); mobidb-lite (MOBIDB_LITE); mobidb-lite (MOBIDB_LITE); mobidb-lite (MOBIDB_LITE); mobidb-lite (MOBIDB_LITE); cd12148 (CDD)	no GO terms	no GO terms
genemark-Pseudochromosome_1-processed-gene-2.100	related to quinic acid utilization activator	771	0.0	F:GO:0003677; F:GO:0003700; C:GO:0005634; P:GO:0009058; P:GO:0034641; F:GO:0043167	F:DNA binding; F:DNA-binding transcription factor activity; C:nucleus; P:biosynthetic process; P:cellular nitrogen compound metabolic process; F:ion binding			IPR001138 (SMART); IPR001138 (PFAM); IPR036864 (G3DSA:4.10.240.GENE3D); IPR007219 (PFAM); mobidb-lite (MOBIDB_LITE); mobidb-lite (MOBIDB_LITE); PTHR31313 (PANTHER); IPR001138 (PROSITE_PROFILES); cd12148 (CDD); IPR001138 (CDD); IPR036864 (SUPERFAMILY)	F:GO:0000981; F:GO:0003677; C:GO:0005634; P:GO:0006351; P:GO:0006355; F:GO:0008270	F:DNA-binding transcription factor activity, RNA polymerase II-specific; F:DNA binding; C:nucleus; P:transcription, DNA-templated; P:regulation of transcription, DNA-templated; F:zinc ion binding
snap_masked-Pseudochromosome_1-processed-gene-2.22	probable monoamine oxidase N	63	2.25822E-32	F:GO:0016491	F:oxidoreductase activity			IPR036188 (G3DSA:3.50.50.GENE3D); IPR036188 (SUPERFAMILY)	no GO terms	no GO terms
genemark-Pseudochromosome_1-processed-gene-1.46	uncharacterized protein FMAN_00075	263	0.0					G3DSA:1.20.120.520 (GENE3D); IPR012312 (PFAM); PTHR38048 (PANTHER); PTHR38048:SF2 (PANTHER); cd12108 (CDD)	no GO terms	no GO terms
genemark-Pseudochromosome_1-processed-gene-2.89	hypothetical protein FOPG_15239	422	0.0					Coil (COILS); Coil (COILS); IPR031348 (PFAM); mobidb-lite (MOBIDB_LITE); SIGNAL_PEPTIDE (PHOBIUS); SIGNAL_PEPTIDE_C_REGION (PHOBIUS); NON_CYTOPLASMIC_DOMAIN (PHOBIUS); SIGNAL_PEPTIDE_N_REGION (PHOBIUS); SIGNAL_PEPTIDE_H_REGION (PHOBIUS)	no GO terms	no GO terms
snap_masked-Pseudochromosome_1-processed-gene-8.64	related to cytidylyltransferase family protein	280	0.0	P:GO:0009058; F:GO:0016779; P:GO:0034641; P:GO:0044281; P:GO:0051186	P:biosynthetic process; F:nucleotidyltransferase activity; P:cellular nitrogen compound metabolic process; P:small molecule metabolic process; P:cofactor metabolic process			IPR004821 (PFAM); IPR014729 (G3DSA:3.40.50.GENE3D); PTHR31285 (PANTHER); IPR005248 (CDD); SSF52374 (SUPERFAMILY)	F:GO:0003824; P:GO:0009058; P:GO:0009435; F:GO:0016779	F:catalytic activity; P:biosynthetic process; P:NAD biosynthetic process; F:nucleotidyltransferase activity
maker-Pseudochromosome_1-snap-gene-14.83	phenylalanyl-tRNA synthetase	484	0.0	F:GO:0003723; C:GO:0005737; P:GO:0006399; P:GO:0006412; P:GO:0006520; F:GO:0016874; F:GO:0043167	F:RNA binding; C:cytoplasm; P:tRNA metabolic process; P:translation; P:cellular amino acid metabolic process; F:ligase activity; F:ion binding	EC:6.1.1.20	Phenylalanine--tRNA ligase	IPR005121 (SMART); G3DSA:3.30.930.10 (GENE3D); IPR005121 (PFAM); IPR002319 (PFAM); IPR004530 (TIGRFAM); IPR036690 (G3DSA:3.30.70.GENE3D); IPR004530 (PTHR11538:PANTHER); PTHR11538 (PANTHER); IPR005121 (PROSITE_PROFILES); IPR006195 (PROSITE_PROFILES); cd00496 (CDD); SignalP-TM (SIGNALP_GRAM_POSITIVE); IPR036690 (SUPERFAMILY); SSF55681 (SUPERFAMILY)	F:GO:0000049; F:GO:0000166; F:GO:0004812; F:GO:0004826; F:GO:0005524; C:GO:0005737; P:GO:0006432; P:GO:0043039	F:tRNA binding; F:nucleotide binding; F:aminoacyl-tRNA ligase activity; F:phenylalanine-tRNA ligase activity; F:ATP binding; C:cytoplasm; P:phenylalanyl-tRNA aminoacylation; P:tRNA aminoacylation
maker-Pseudochromosome_1-snap-gene-8.90	global transactivator	417	2.02352E-38	F:GO:0043167	F:ion binding			IPR038718 (G3DSA:3.40.50.GENE3D); IPR000330 (PFAM); mobidb-lite (MOBIDB_LITE); mobidb-lite (MOBIDB_LITE); mobidb-lite (MOBIDB_LITE); SIGNAL_PEPTIDE_C_REGION (PHOBIUS); SIGNAL_PEPTIDE_N_REGION (PHOBIUS); SIGNAL_PEPTIDE (PHOBIUS); SIGNAL_PEPTIDE_H_REGION (PHOBIUS); NON_CYTOPLASMIC_DOMAIN (PHOBIUS); IPR027417 (SUPERFAMILY)	F:GO:0005524	F:ATP binding
genemark-Pseudochromosome_1-processed-gene-9.0	hypothetical protein FPRO05_04487	306	6.56308E-156					mobidb-lite (MOBIDB_LITE); mobidb-lite (MOBIDB_LITE)	no GO terms	no GO terms
snap_masked-Pseudochromosome_1-processed-gene-7.62	uncharacterized protein FPRN_00248	147	9.33488E-95	C:GO:0005575	C:cellular_component			IPR009598 (SMART); PF06726 (PFAM); IPR009598 (PANTHER); NON_CYTOPLASMIC_DOMAIN (PHOBIUS); TRANSMEMBRANE (PHOBIUS); CYTOPLASMIC_DOMAIN (PHOBIUS); IPR009598 (PRODOM); TMhelix (TMHMM)	no GO terms	no GO terms
genemark-Pseudochromosome_1-processed-gene-15.70	related to bZIP transcription factor	610	0.0					Coil (COILS); IPR021833 (PFAM); G3DSA:1.20.5.170 (GENE3D); mobidb-lite (MOBIDB_LITE); mobidb-lite (MOBIDB_LITE); mobidb-lite (MOBIDB_LITE); mobidb-lite (MOBIDB_LITE); mobidb-lite (MOBIDB_LITE); PTHR11462:SF39 (PANTHER); PTHR11462 (PANTHER); cd14688 (CDD)	no GO terms	no GO terms
maker-Pseudochromosome_1-augustus-gene-10.1	related to calpain	920	0.0	C:GO:0005622; F:GO:0008233	C:intracellular; F:peptidase activity	EC:3.4.22	Acting on peptide bonds (peptidases)	Coil (COILS); IPR001300 (SMART); IPR001300 (PFAM); G3DSA:3.90.70.10 (GENE3D); mobidb-lite (MOBIDB_LITE); mobidb-lite (MOBIDB_LITE); mobidb-lite (MOBIDB_LITE); mobidb-lite (MOBIDB_LITE); mobidb-lite (MOBIDB_LITE); mobidb-lite (MOBIDB_LITE); mobidb-lite (MOBIDB_LITE); mobidb-lite (MOBIDB_LITE); PTHR10183:SF294 (PANTHER); PTHR10183 (PANTHER); IPR001300 (PROSITE_PROFILES); IPR001300 (CDD); IPR038765 …	F:GO:0004198; C:GO:0005622; P:GO:0006508	F:calcium-dependent cysteine-type endopeptidase activity; C:intracellular; P:proteolysis
snap_masked-Pseudochromosome_1-processed-gene-4.107	carbohydrate-binding-like protein	268	2.39674E-156					mobidb-lite (MOBIDB_LITE); mobidb-lite (MOBIDB_LITE)	no GO terms	no GO terms
snap_masked-Pseudochromosome_1-processed-gene-5.61	related to inositol phosphatase	353	0.0	C:GO:0005575; P:GO:0006629	C:cellular_component; P:lipid metabolic process			IPR000760 (PRINTS); G3DSA:3.30.540.10 (GENE3D); IPR000760 (PFAM); G3DSA:3.40.190.80 (GENE3D); PTHR43200 (PANTHER); PTHR43200:SF2 (PANTHER); CYTOPLASMIC_DOMAIN (PHOBIUS); NON_CYTOPLASMIC_DOMAIN (PHOBIUS); TRANSMEMBRANE (PHOBIUS); cd01517 (CDD); SSF56655 (SUPERFAMILY); TMhelix (TMHMM)	P:GO:0046854	P:phosphatidylinositol phosphorylation
augustus_masked-Pseudochromosome_1-processed-gene-1.116	related to feruloyl esterase B precursor	480	0.0	F:GO:0003674	F:molecular_function			IPR011118 (PFAM); IPR011118 (PANTHER); PTHR33938:SF9 (PANTHER); SIGNAL_PEPTIDE_N_REGION (PHOBIUS); SIGNAL_PEPTIDE_C_REGION (PHOBIUS); NON_CYTOPLASMIC_DOMAIN (PHOBIUS); SIGNAL_PEPTIDE (PHOBIUS); SIGNAL_PEPTIDE_H_REGION (PHOBIUS); SignalP-noTM (SIGNALP_EUK); IPR029058 (SUPERFAMILY); TMhelix (TMHMM)	no GO terms	no GO terms
genemark-Pseudochromosome_1-processed-gene-9.22	related to SDA1 protein, required for normal organization of the actin cytoskeleton	740	0.0	C:GO:0005730; P:GO:0006913; P:GO:0007010; P:GO:0042254	C:nucleolus; P:nucleocytoplasmic transport; P:cytoskeleton organization; P:ribosome biogenesis			Coil (COILS); Coil (COILS); IPR012977 (PFAM); IPR007949 (PFAM); mobidb-lite (MOBIDB_LITE); mobidb-lite (MOBIDB_LITE); mobidb-lite (MOBIDB_LITE); mobidb-lite (MOBIDB_LITE); mobidb-lite (MOBIDB_LITE); mobidb-lite (MOBIDB_LITE); IPR027312 (PANTHER); IPR016024 (SUPERFAMILY)	P:GO:0000055; P:GO:0030036; P:GO:0042273	P:ribosomal large subunit export from nucleus; P:actin cytoskeleton organization; P:ribosomal large subunit biogenesis
genemark-Pseudochromosome_1-processed-gene-6.116	DNA-repair protein complementing XP-A cells	382	0.0	F:GO:0003677; C:GO:0005634; P:GO:0006259; P:GO:0006950	F:DNA binding; C:nucleus; P:DNA metabolic process; P:response to stress			IPR000465 (TIGRFAM); IPR022656 (PFAM); IPR037129 (G3DSA:3.90.530.GENE3D); mobidb-lite (MOBIDB_LITE); mobidb-lite (MOBIDB_LITE); mobidb-lite (MOBIDB_LITE); mobidb-lite (MOBIDB_LITE); mobidb-lite (MOBIDB_LITE); IPR000465 (PANTHER); IPR009061 (SUPERFAMILY)	F:GO:0003684; C:GO:0005634; P:GO:0006289	F:damaged DNA binding; C:nucleus; P:nucleotide-excision repair
snap_masked-Pseudochromosome_1-processed-gene-4.112	related to 3-oxoadipate enol-lactonase II	285	0.0					IPR029058 (G3DSA:3.40.50.GENE3D); IPR000073 (PFAM); PTHR43039 (PANTHER); PTHR43039:SF3 (PANTHER); IPR029058 (SUPERFAMILY)	no GO terms	no GO terms
snap_masked-Pseudochromosome_1-processed-gene-3.49	uncharacterized protein FFMR_00097	111	1.96034E-58	C:GO:0016020; C:GO:0016021	C:membrane; C:integral component of membrane			no IPS match	no IPS match	no IPS match
genemark-Pseudochromosome_1-processed-gene-14.26	Replicase polyprotein 1a	387	0.0	C:GO:0005634; P:GO:0007059; P:GO:0009056; C:GO:0032991; P:GO:0051276; P:GO:0140014	C:nucleus; P:chromosome segregation; P:catabolic process; C:protein-containing complex; P:chromosome organization; P:mitotic nuclear division			Coil (COILS); IPR008402 (PFAM); mobidb-lite (MOBIDB_LITE); mobidb-lite (MOBIDB_LITE); mobidb-lite (MOBIDB_LITE); mobidb-lite (MOBIDB_LITE); mobidb-lite (MOBIDB_LITE); mobidb-lite (MOBIDB_LITE); mobidb-lite (MOBIDB_LITE); mobidb-lite (MOBIDB_LITE)	C:GO:0005680; P:GO:0030071; P:GO:0031145	C:anaphase-promoting complex; P:regulation of mitotic metaphase/anaphase transition; P:anaphase-promoting complex-dependent catabolic process
genemark-Pseudochromosome_1-processed-gene-7.37	30S ribosomal protein S19	91	4.47071E-60	F:GO:0003723; F:GO:0003735; C:GO:0005739; C:GO:0005840; P:GO:0006412	F:RNA binding; F:structural constituent of ribosome; C:mitochondrion; C:ribosome; P:translation			IPR002222 (PRINTS); IPR002222 (PRINTS); IPR002222 (PRINTS); IPR023575 (G3DSA:3.30.860.GENE3D); IPR002222 (PFAM); IPR002222 (PIRSF); IPR002222 (PANTHER); PTHR11880:SF8 (PANTHER); IPR002222 (HAMAP); IPR023575 (SUPERFAMILY)	F:GO:0003735; C:GO:0005840; P:GO:0006412	F:structural constituent of ribosome; C:ribosome; P:translation
genemark-Pseudochromosome_1-processed-gene-10.13	related to Y.lipolytica GPR1 protein and Fun34p	289	0.0	C:GO:0005575	C:cellular_component			IPR000791 (PFAM); PTHR31123 (PANTHER); IPR030186 (PTHR31123:PANTHER); TRANSMEMBRANE (PHOBIUS); CYTOPLASMIC_DOMAIN (PHOBIUS); NON_CYTOPLASMIC_DOMAIN (PHOBIUS); TRANSMEMBRANE (PHOBIUS); NON_CYTOPLASMIC_DOMAIN (PHOBIUS); TRANSMEMBRANE (PHOBIUS); NON_CYTOPLASMIC_DOMAIN (PHOBIUS); TRANSMEMBRANE (PHOBIUS); CYTOPLASMIC_DOMAIN (PHOBIUS); TRANSMEMBRANE (PHOBIUS); CYTOPLASMIC_DOMAIN (PHOBIUS); CYTOPLASMIC_…	C:GO:0016021	C:integral component of membrane
maker-Pseudochromosome_1-augustus-gene-13.111	protein phosphatase	401	0.0	C:GO:0000228; P:GO:0000902; P:GO:0006464; P:GO:0006629; P:GO:0006790; P:GO:0007059; P:GO:0009058; F:GO:0016791; C:GO:0032991; P:GO:0034641; P:GO:0044281; P:GO:0051186; P:GO:0051276; P:GO:0140014	C:nuclear chromosome; P:cell morphogenesis; P:cellular protein modification process; P:lipid metabolic process; P:sulfur compound metabolic process; P:chromosome segregation; P:biosynthetic process; F:phosphatase activity; C:protein-containing complex; P:cellular nitrogen compound metabolic process; P:small molecule metabolic process; P:cofactor metabolic process; P:chromosome organization; P:mit…	EC:3.1.3.16	Protein-serine/threonine phosphatase	IPR006186 (PRINTS); IPR006186 (SMART); PIRSF033096 (PIRSF); IPR004843 (PFAM); mobidb-lite (MOBIDB_LITE); mobidb-lite (MOBIDB_LITE); PTHR11668:SF24 (PANTHER); PTHR11668 (PANTHER); cd07415 (CDD); SSF56300 (SUPERFAMILY)	F:GO:0016787	F:hydrolase activity
genemark-Pseudochromosome_1-processed-gene-10.19	hypothetical protein FNYG_08943	515	0.0	C:GO:0005575; F:GO:0016491; F:GO:0043167	C:cellular_component; F:oxidoreductase activity; F:ion binding			IPR036396 (G3DSA:1.10.630.GENE3D); IPR001128 (PFAM); PTHR24279:SF85 (PANTHER); PTHR24279 (PANTHER); TRANSMEMBRANE (PHOBIUS); CYTOPLASMIC_DOMAIN (PHOBIUS); NON_CYTOPLASMIC_DOMAIN (PHOBIUS); CYTOPLASMIC_DOMAIN (PHOBIUS); TRANSMEMBRANE (PHOBIUS); TRANSMEMBRANE (PHOBIUS); NON_CYTOPLASMIC_DOMAIN (PHOBIUS); IPR036396 (SUPERFAMILY); TMhelix (TMHMM)	F:GO:0005506; F:GO:0016705; F:GO:0020037; P:GO:0055114	F:iron ion binding; F:oxidoreductase activity, acting on paired donors, with incorporation or reduction of molecular oxygen; F:heme binding; P:oxidation-reduction process
snap_masked-Pseudochromosome_1-processed-gene-7.52	uncharacterized protein FFUJ_01853	378	0.0	C:GO:0005575	C:cellular_component			IPR026841 (PFAM); PTHR31310:SF7 (PANTHER); PTHR31310 (PANTHER); TRANSMEMBRANE (PHOBIUS); CYTOPLASMIC_DOMAIN (PHOBIUS); CYTOPLASMIC_DOMAIN (PHOBIUS); TRANSMEMBRANE (PHOBIUS); CYTOPLASMIC_DOMAIN (PHOBIUS); TRANSMEMBRANE (PHOBIUS); NON_CYTOPLASMIC_DOMAIN (PHOBIUS); NON_CYTOPLASMIC_DOMAIN (PHOBIUS); TRANSMEMBRANE (PHOBIUS); NON_CYTOPLASMIC_DOMAIN (PHOBIUS); TRANSMEMBRANE (PHOBIUS); CYTOPLASMIC_DOMAIN…	no GO terms	no GO terms
genemark-Pseudochromosome_1-processed-gene-4.20	hypothetical protein FNYG_15133	705	0.0					Coil (COILS); Coil (COILS); mobidb-lite (MOBIDB_LITE); mobidb-lite (MOBIDB_LITE); PTHR40619 (PANTHER)	no GO terms	no GO terms
genemark-Pseudochromosome_1-processed-gene-12.47	ubiquitin-conjugating enzyme E2 C	180	2.07314E-130	F:GO:0043167	F:ion binding			SM00212 (SMART); IPR016135 (G3DSA:3.10.110.GENE3D); IPR000608 (PFAM); mobidb-lite (MOBIDB_LITE); PTHR43898:SF9 (PANTHER); PTHR43898 (PANTHER); IPR000608 (PROSITE_PROFILES); IPR000608 (CDD); IPR016135 (SUPERFAMILY)	no GO terms	no GO terms
snap_masked-Pseudochromosome_1-processed-gene-3.55	hypothetical protein FPRO05_04326	354	4.15611E-179					no IPS match	no IPS match	no IPS match
genemark-Pseudochromosome_1-processed-gene-6.121	hypothetical protein FNYG_08841	695	0.0					IPR018617 (PFAM); mobidb-lite (MOBIDB_LITE); mobidb-lite (MOBIDB_LITE); mobidb-lite (MOBIDB_LITE); mobidb-lite (MOBIDB_LITE); mobidb-lite (MOBIDB_LITE); mobidb-lite (MOBIDB_LITE); mobidb-lite (MOBIDB_LITE); PTHR28538 (PANTHER); CYTOPLASMIC_DOMAIN (PHOBIUS); TRANSMEMBRANE (PHOBIUS); TRANSMEMBRANE (PHOBIUS); NON_CYTOPLASMIC_DOMAIN (PHOBIUS); CYTOPLASMIC_DOMAIN (PHOBIUS); TRANSMEMBRANE (PHOBIUS); TR…	no GO terms	no GO terms
genemark-Pseudochromosome_1-processed-gene-14.10	phosphate system cyclin PHO80	352	0.0	P:GO:0006464; P:GO:0007049; F:GO:0019899	P:cellular protein modification process; P:cell cycle; F:enzyme binding			IPR013922 (PFAM); G3DSA:1.10.472.10 (GENE3D); mobidb-lite (MOBIDB_LITE); mobidb-lite (MOBIDB_LITE); mobidb-lite (MOBIDB_LITE); mobidb-lite (MOBIDB_LITE); PTHR15615 (PANTHER); PTHR15615:SF0 (PANTHER); SIGNAL_PEPTIDE_C_REGION (PHOBIUS); NON_CYTOPLASMIC_DOMAIN (PHOBIUS); SIGNAL_PEPTIDE_N_REGION (PHOBIUS); SIGNAL_PEPTIDE (PHOBIUS); SIGNAL_PEPTIDE_H_REGION (PHOBIUS); IPR036915 (SUPERFAMILY)	P:GO:0000079; F:GO:0019901	P:regulation of cyclin-dependent protein serine/threonine kinase activity; F:protein kinase binding
snap_masked-Pseudochromosome_1-processed-gene-0.10	Peptidase C45, acyl-coenzyme A:6-aminopenicillanic acid acyl-transferase	358	9.11042E-163	F:GO:0003674	F:molecular_function			IPR005079 (PFAM); G3DSA:1.10.10.2120 (GENE3D); G3DSA:3.60.60.10 (GENE3D); PTHR34180 (PANTHER)	no GO terms	no GO terms
genemark-Pseudochromosome_1-processed-gene-13.1	40S ribosomal protein S2	286	0.0	F:GO:0003735; C:GO:0005829; C:GO:0005840; P:GO:0006412; P:GO:0006913; F:GO:0019843; P:GO:0042254	F:structural constituent of ribosome; C:cytosol; C:ribosome; P:translation; P:nucleocytoplasmic transport; F:rRNA binding; P:ribosome biogenesis			IPR005711 (TIGRFAM); IPR005324 (PFAM); G3DSA:3.30.160.770 (GENE3D); IPR014721 (G3DSA:3.30.230.GENE3D); IPR013810 (PFAM); mobidb-lite (MOBIDB_LITE); mobidb-lite (MOBIDB_LITE); IPR000851 (PANTHER); PTHR13718:SF79 (PANTHER); IPR000851 (PANTHER); PTHR13718:SF79 (PANTHER); IPR013810 (PROSITE_PROFILES); IPR020568 (SUPERFAMILY); SSF54768 (SUPERFAMILY)	F:GO:0003723; F:GO:0003735; C:GO:0005840; P:GO:0006412; C:GO:0015935	F:RNA binding; F:structural constituent of ribosome; C:ribosome; P:translation; C:small ribosomal subunit
snap_masked-Pseudochromosome_1-processed-gene-2.38	related to pentafunctional arom polypeptide	305	0.0	F:GO:0016491	F:oxidoreductase activity	EC:1.1.1.25; EC:1.1.1.282	Shikimate dehydrogenase; Quinate/shikimate dehydrogenase	G3DSA:3.40.50.720 (GENE3D); IPR013708 (PFAM); G3DSA:3.40.50.10860 (GENE3D); PTHR21089 (PANTHER); PTHR21089:SF1 (PANTHER); cd01065 (CDD); SSF53223 (SUPERFAMILY); IPR036291 (SUPERFAMILY)	F:GO:0004764; P:GO:0055114	F:shikimate 3-dehydrogenase (NADP+) activity; P:oxidation-reduction process
snap_masked-Pseudochromosome_1-processed-gene-5.78	Probable transporter MCH1	565	0.0	C:GO:0005575; P:GO:0055085	C:cellular_component; P:transmembrane transport			IPR011701 (PFAM); mobidb-lite (MOBIDB_LITE); mobidb-lite (MOBIDB_LITE); PTHR21576 (PANTHER); PTHR21576:SF45 (PANTHER); NON_CYTOPLASMIC_DOMAIN (PHOBIUS); TRANSMEMBRANE (PHOBIUS); CYTOPLASMIC_DOMAIN (PHOBIUS); TRANSMEMBRANE (PHOBIUS); NON_CYTOPLASMIC_DOMAIN (PHOBIUS); TRANSMEMBRANE (PHOBIUS); NON_CYTOPLASMIC_DOMAIN (PHOBIUS); TRANSMEMBRANE (PHOBIUS); CYTOPLASMIC_DOMAIN (PHOBIUS); TRANSMEMBRANE (PHO…	C:GO:0016021; P:GO:0055085	C:integral component of membrane; P:transmembrane transport
genemark-Pseudochromosome_1-processed-gene-5.25	uncharacterized protein Y057_14782	393	0.0					mobidb-lite (MOBIDB_LITE); mobidb-lite (MOBIDB_LITE); mobidb-lite (MOBIDB_LITE); mobidb-lite (MOBIDB_LITE)	no GO terms	no GO terms
snap_masked-Pseudochromosome_1-processed-gene-1.77	related to O-methyltransferase	231	2.59088E-158	F:GO:0008168	F:methyltransferase activity			G3DSA:3.40.50.150 (GENE3D); IPR002935 (PFAM); PTHR10509:SF49 (PANTHER); PTHR10509 (PANTHER); IPR002935 (PROSITE_PROFILES); cd02440 (CDD); IPR029063 (SUPERFAMILY)	F:GO:0008171	F:O-methyltransferase activity
genemark-Pseudochromosome_1-processed-gene-15.77	related to rna-binding protein fus/tls	299	0.0	F:GO:0003674	F:molecular_function			IPR001202 (SMART); IPR001202 (PFAM); G3DSA:2.20.70.10 (GENE3D); mobidb-lite (MOBIDB_LITE); mobidb-lite (MOBIDB_LITE); mobidb-lite (MOBIDB_LITE); mobidb-lite (MOBIDB_LITE); mobidb-lite (MOBIDB_LITE); mobidb-lite (MOBIDB_LITE); IPR001202 (PROSITE_PROFILES); IPR001202 (CDD); IPR036020 (SUPERFAMILY)	F:GO:0005515	F:protein binding
snap_masked-Pseudochromosome_1-processed-gene-4.98	proline racemase	336	0.0					G3DSA:3.10.310.10 (GENE3D); IPR008794 (PIRSF); G3DSA:3.10.310.10 (GENE3D); IPR008794 (PFAM); IPR008794 (PTHR33442:PANTHER); IPR008794 (PANTHER); SSF54506 (SUPERFAMILY)	no GO terms	no GO terms
genemark-Pseudochromosome_1-processed-gene-11.99	hypothetical protein FNYG_07470	722	0.0	C:GO:0005575	C:cellular_component			mobidb-lite (MOBIDB_LITE); mobidb-lite (MOBIDB_LITE); mobidb-lite (MOBIDB_LITE); mobidb-lite (MOBIDB_LITE); mobidb-lite (MOBIDB_LITE); mobidb-lite (MOBIDB_LITE); mobidb-lite (MOBIDB_LITE); mobidb-lite (MOBIDB_LITE); mobidb-lite (MOBIDB_LITE); mobidb-lite (MOBIDB_LITE); mobidb-lite (MOBIDB_LITE); mobidb-lite (MOBIDB_LITE); mobidb-lite (MOBIDB_LITE); mobidb-lite (MOBIDB_LITE); PTHR42088 (PANTHER); …	no GO terms	no GO terms
genemark-Pseudochromosome_1-processed-gene-10.22	cutinase precursor	356	0.0	F:GO:0003674; C:GO:0005576	F:molecular_function; C:extracellular region	EC:3.1.1.74; EC:3.1.1.1	Cutinase; Carboxylesterase	IPR011150 (PRINTS); IPR000675 (SMART); IPR029058 (G3DSA:3.40.50.GENE3D); IPR000675 (PFAM); mobidb-lite (MOBIDB_LITE); mobidb-lite (MOBIDB_LITE); mobidb-lite (MOBIDB_LITE); PTHR15087:SF12 (PANTHER); PTHR15087 (PANTHER); SIGNAL_PEPTIDE_C_REGION (PHOBIUS); NON_CYTOPLASMIC_DOMAIN (PHOBIUS); SIGNAL_PEPTIDE_N_REGION (PHOBIUS); SIGNAL_PEPTIDE (PHOBIUS); SIGNAL_PEPTIDE_H_REGION (PHOBIUS); SignalP-noTM (S…	C:GO:0005576; F:GO:0016787; F:GO:0050525	C:extracellular region; F:hydrolase activity; F:cutinase activity
snap_masked-Pseudochromosome_1-processed-gene-11.75	protein transporter SEC61 subunit beta	131	1.81526E-62	C:GO:0005737; C:GO:0005783; P:GO:0006810; F:GO:0016791; C:GO:0032991	C:cytoplasm; C:endoplasmic reticulum; P:transport; F:phosphatase activity; C:protein-containing complex			IPR016482 (PFAM); IPR030671 (PIRSF); mobidb-lite (MOBIDB_LITE); mobidb-lite (MOBIDB_LITE); mobidb-lite (MOBIDB_LITE); PTHR13509:SF3 (PANTHER); IPR030671 (PANTHER); CYTOPLASMIC_DOMAIN (PHOBIUS); TRANSMEMBRANE (PHOBIUS); NON_CYTOPLASMIC_DOMAIN (PHOBIUS)	C:GO:0005784; P:GO:0006886	C:Sec61 translocon complex; P:intracellular protein transport
genemark-Pseudochromosome_1-processed-gene-15.80	related to myocyte-specific enhancer factor 2d	485	0.0	F:GO:0003674	F:molecular_function			IPR015943 (G3DSA:2.130.10.GENE3D); IPR036322 (SUPERFAMILY)	F:GO:0005515	F:protein binding
maker-Pseudochromosome_1-augustus-gene-0.32	putative polyketide synthase	2667	0.0	F:GO:0016491; F:GO:0043167	F:oxidoreductase activity; F:ion binding			IPR020841 (SMART); SM00822 (SMART); IPR020801 (SMART); IPR020807 (SMART); IPR020843 (SMART); IPR020806 (SMART); G3DSA:3.90.180.10 (GENE3D); IPR013149 (PFAM); G3DSA:3.40.50.150 (GENE3D); IPR014043 (PFAM); IPR013968 (PFAM); IPR009081 (PFAM); G3DSA:3.10.129.110 (GENE3D); G3DSA:3.40.50.720 (GENE3D); IPR001227 (G3DSA:3.40.366.GENE3D); IPR014031 (PFAM); IPR013217 (PFAM); G3DSA:3.40.50.720 (GENE3D); IPR…	F:GO:0003824; F:GO:0016491; F:GO:0016740; F:GO:0031177; P:GO:0055114	F:catalytic activity; F:oxidoreductase activity; F:transferase activity; F:phosphopantetheine binding; P:oxidation-reduction process
genemark-Pseudochromosome_1-processed-gene-8.8	related to vacuolar protein sorting PEP5 protein	962	0.0	C:GO:0005768; C:GO:0005773; P:GO:0016192; F:GO:0030674; C:GO:0032991	C:endosome; C:vacuole; P:vesicle-mediated transport; F:protein binding, bridging; C:protein-containing complex			IPR011990 (G3DSA:1.25.40.GENE3D); IPR016528 (PIRSF); IPR000547 (PFAM); IPR024763 (PFAM); IPR016528 (PTHR23323:PANTHER); PTHR23323 (PANTHER); IPR001841 (PROSITE_PROFILES); IPR000547 (PROSITE_PROFILES); cd16688 (CDD); SSF57850 (SUPERFAMILY); IPR016024 (SUPERFAMILY); IPR036322 (SUPERFAMILY)	F:GO:0005515; P:GO:0006886; P:GO:0016192	F:protein binding; P:intracellular protein transport; P:vesicle-mediated transport
snap_masked-Pseudochromosome_1-processed-gene-12.55	hypothetical protein FNYG_07502	227	5.95418E-159	C:GO:0005575; F:GO:0016746	C:cellular_component; F:transferase activity, transferring acyl groups			G3DSA:3.40.630.30 (GENE3D); IPR000182 (PFAM); IPR039135 (PANTHER); PTHR13256:SF67 (PANTHER); IPR016181 (SUPERFAMILY)	F:GO:0016747	F:transferase activity, transferring acyl groups other than amino-acyl groups
genemark-Pseudochromosome_1-processed-gene-12.41	Mediator of RNA polymerase II transcription subunit 8	260	0.0	F:GO:0003674; C:GO:0005654; P:GO:0009058; C:GO:0032991; P:GO:0034641	F:molecular_function; C:nucleoplasm; P:biosynthetic process; C:protein-containing complex; P:cellular nitrogen compound metabolic process			IPR019364 (PFAM); mobidb-lite (MOBIDB_LITE); mobidb-lite (MOBIDB_LITE); mobidb-lite (MOBIDB_LITE); mobidb-lite (MOBIDB_LITE); IPR019364 (PANTHER); IPR020178 (PRODOM)	F:GO:0003712; P:GO:0006357; C:GO:0016592	F:transcription coregulator activity; P:regulation of transcription by RNA polymerase II; C:mediator complex
maker-Pseudochromosome_1-augustus-gene-3.12	non-ribosomal peptide synthetase	2559	0.0	F:GO:0016874	F:ligase activity			IPR000873 (PFAM); G3DSA:3.30.559.30 (GENE3D); IPR023213 (G3DSA:3.30.559.GENE3D); G3DSA:3.30.559.30 (GENE3D); IPR023213 (G3DSA:3.30.559.GENE3D); G3DSA:3.30.300.30 (GENE3D); G3DSA:3.30.300.30 (GENE3D); IPR009081 (PFAM); G3DSA:3.40.50.12780 (GENE3D); G3DSA:3.30.559.30 (GENE3D); IPR010071 (TIGRFAM); IPR036736 (G3DSA:1.10.1200.GENE3D); IPR001242 (PFAM); PTHR45527 (PANTHER); CYTOPLASMIC_DOMAIN (PHOBIUS…	F:GO:0003824	F:catalytic activity
genemark-Pseudochromosome_1-processed-gene-12.22	related to telomere length regulator protein rif1	1773	0.0					Coil (COILS); IPR022031 (PFAM); mobidb-lite (MOBIDB_LITE); mobidb-lite (MOBIDB_LITE); mobidb-lite (MOBIDB_LITE); mobidb-lite (MOBIDB_LITE); mobidb-lite (MOBIDB_LITE); mobidb-lite (MOBIDB_LITE); mobidb-lite (MOBIDB_LITE); mobidb-lite (MOBIDB_LITE); mobidb-lite (MOBIDB_LITE); mobidb-lite (MOBIDB_LITE); mobidb-lite (MOBIDB_LITE); mobidb-lite (MOBIDB_LITE); mobidb-lite (MOBIDB_LITE); mobidb-lite (MOB…	no GO terms	no GO terms
genemark-Pseudochromosome_1-processed-gene-2.110	putative arylsulfatase protein	426	0.0	F:GO:0003674	F:molecular_function			IPR000917 (PFAM); IPR017849 (G3DSA:3.40.720.GENE3D); PTHR43108:SF8 (PANTHER); PTHR43108 (PANTHER); NON_CYTOPLASMIC_DOMAIN (PHOBIUS); SIGNAL_PEPTIDE_H_REGION (PHOBIUS); SIGNAL_PEPTIDE_C_REGION (PHOBIUS); SIGNAL_PEPTIDE (PHOBIUS); SIGNAL_PEPTIDE_N_REGION (PHOBIUS); cd16147 (CDD); SignalP-TM (SIGNALP_GRAM_POSITIVE); SignalP-noTM (SIGNALP_EUK); SignalP-noTM (SIGNALP_GRAM_NEGATIVE); IPR017850 (SUPERFA…	F:GO:0003824; F:GO:0008484	F:catalytic activity; F:sulfuric ester hydrolase activity
genemark-Pseudochromosome_1-processed-gene-4.45	related to quinate transport protein	543	0.0	C:GO:0005575; F:GO:0022857	C:cellular_component; F:transmembrane transporter activity			IPR003663 (PRINTS); G3DSA:1.20.1250.20 (GENE3D); IPR005828 (PFAM); IPR003663 (TIGRFAM); PTHR23500 (PANTHER); PTHR23500:SF50 (PANTHER); TRANSMEMBRANE (PHOBIUS); TRANSMEMBRANE (PHOBIUS); NON_CYTOPLASMIC_DOMAIN (PHOBIUS); TRANSMEMBRANE (PHOBIUS); NON_CYTOPLASMIC_DOMAIN (PHOBIUS); CYTOPLASMIC_DOMAIN (PHOBIUS); TRANSMEMBRANE (PHOBIUS); TRANSMEMBRANE (PHOBIUS); TRANSMEMBRANE (PHOBIUS); CYTOPLASMIC_DOMA…	C:GO:0016020; C:GO:0016021; F:GO:0022857; P:GO:0055085	C:membrane; C:integral component of membrane; F:transmembrane transporter activity; P:transmembrane transport
snap_masked-Pseudochromosome_1-processed-gene-7.40	related to MDR1-Mac1p interacting protein	1054	0.0					Coil (COILS); IPR000195 (SMART); G3DSA:1.10.472.80 (GENE3D); IPR000195 (PFAM); G3DSA:1.10.8.270 (GENE3D); mobidb-lite (MOBIDB_LITE); mobidb-lite (MOBIDB_LITE); mobidb-lite (MOBIDB_LITE); mobidb-lite (MOBIDB_LITE); mobidb-lite (MOBIDB_LITE); mobidb-lite (MOBIDB_LITE); mobidb-lite (MOBIDB_LITE); mobidb-lite (MOBIDB_LITE); mobidb-lite (MOBIDB_LITE); mobidb-lite (MOBIDB_LITE); mobidb-lite (MOBIDB_LIT…	no GO terms	no GO terms
snap_masked-Pseudochromosome_1-processed-gene-12.77	uncharacterized protein LW93_11515	350	0.0					no IPS match	no IPS match	no IPS match
genemark-Pseudochromosome_1-processed-gene-6.119	tat pathway signal sequence	280	0.0	C:GO:0005575; P:GO:0009058; P:GO:0019748	C:cellular_component; P:biosynthetic process; P:secondary metabolic process			IPR021765 (PFAM); mobidb-lite (MOBIDB_LITE); mobidb-lite (MOBIDB_LITE); mobidb-lite (MOBIDB_LITE); IPR021765 (PANTHER); PTHR33365:SF4 (PANTHER); NON_CYTOPLASMIC_DOMAIN (PHOBIUS); CYTOPLASMIC_DOMAIN (PHOBIUS); TRANSMEMBRANE (PHOBIUS); TMhelix (TMHMM)	P:GO:0043386	P:mycotoxin biosynthetic process
genemark-Pseudochromosome_1-processed-gene-14.22	probable sexual development activator VeA protein	530	0.0	C:GO:0005634; C:GO:0005737; P:GO:0030154; P:GO:0048646	C:nucleus; C:cytoplasm; P:cell differentiation; P:anatomical structure formation involved in morphogenesis			IPR038491 (G3DSA:2.60.40.GENE3D); IPR037525 (PFAM); mobidb-lite (MOBIDB_LITE); mobidb-lite (MOBIDB_LITE); mobidb-lite (MOBIDB_LITE); mobidb-lite (MOBIDB_LITE); mobidb-lite (MOBIDB_LITE); mobidb-lite (MOBIDB_LITE); mobidb-lite (MOBIDB_LITE); PTHR33572:SF3 (PANTHER); IPR021740 (PANTHER); IPR037525 (PROSITE_PROFILES)	no GO terms	no GO terms
snap_masked-Pseudochromosome_1-processed-gene-3.43	hypothetical protein FNYG_05245	476	0.0					G3DSA:3.30.70.1990 (GENE3D); G3DSA:1.10.405.20 (GENE3D); IPR036188 (G3DSA:3.50.50.GENE3D); PF13450 (PFAM); PTHR42923 (PANTHER); PTHR42923:SF18 (PANTHER); IPR036188 (SUPERFAMILY)	no GO terms	no GO terms
genemark-Pseudochromosome_1-processed-gene-12.38	uncharacterized protein FPRN_00391	376	0.0					mobidb-lite (MOBIDB_LITE); mobidb-lite (MOBIDB_LITE); mobidb-lite (MOBIDB_LITE); mobidb-lite (MOBIDB_LITE); mobidb-lite (MOBIDB_LITE); SIGNAL_PEPTIDE_N_REGION (PHOBIUS); SIGNAL_PEPTIDE (PHOBIUS); SIGNAL_PEPTIDE_C_REGION (PHOBIUS); NON_CYTOPLASMIC_DOMAIN (PHOBIUS); SIGNAL_PEPTIDE_H_REGION (PHOBIUS); SignalP-noTM (SIGNALP_EUK)	no GO terms	no GO terms
snap_masked-Pseudochromosome_1-processed-gene-1.99	-No description-	103						no IPS match	no IPS match	no IPS match
snap_masked-Pseudochromosome_1-processed-gene-13.75	uncharacterized protein FPRN_00421	732	0.0					Coil (COILS)	no GO terms	no GO terms
genemark-Pseudochromosome_1-processed-gene-6.112	beta-glucosidase	621	0.0	P:GO:0005975; F:GO:0016798	P:carbohydrate metabolic process; F:hydrolase activity, acting on glycosyl bonds			IPR001360 (PRINTS); IPR001360 (PFAM); G3DSA:3.20.20.80 (GENE3D); IPR001360 (PANTHER); PTHR10353:SF53 (PANTHER); SIGNAL_PEPTIDE (PHOBIUS); SIGNAL_PEPTIDE_H_REGION (PHOBIUS); SIGNAL_PEPTIDE_N_REGION (PHOBIUS); SIGNAL_PEPTIDE_C_REGION (PHOBIUS); NON_CYTOPLASMIC_DOMAIN (PHOBIUS); SignalP-noTM (SIGNALP_EUK); IPR017853 (SUPERFAMILY)	F:GO:0004553; P:GO:0005975	F:hydrolase activity, hydrolyzing O-glycosyl compounds; P:carbohydrate metabolic process
genemark-Pseudochromosome_1-processed-gene-13.24	Origin recognition complex subunit 6	382	0.0	C:GO:0000228; F:GO:0003677; P:GO:0006259; P:GO:0009058; C:GO:0032991	C:nuclear chromosome; F:DNA binding; P:DNA metabolic process; P:biosynthetic process; C:protein-containing complex			IPR008721 (PFAM); mobidb-lite (MOBIDB_LITE); mobidb-lite (MOBIDB_LITE); mobidb-lite (MOBIDB_LITE)	F:GO:0003677; C:GO:0005664; P:GO:0006260	F:DNA binding; C:nuclear origin of replication recognition complex; P:DNA replication
snap_masked-Pseudochromosome_1-processed-gene-9.40	hypothetical protein FVER53590_25777	69	1.03415E-6					mobidb-lite (MOBIDB_LITE)	no GO terms	no GO terms
genemark-Pseudochromosome_1-processed-gene-8.20	related to (AAP1)-alanine/arginine aminopeptidase	983	0.0	F:GO:0008233; F:GO:0043167	F:peptidase activity; F:ion binding	EC:3.4.11	Acting on peptide bonds (peptidases)	IPR014782 (PRINTS); G3DSA:1.10.390.60 (GENE3D); G3DSA:2.60.40.1910 (GENE3D); G3DSA:1.25.50.20 (GENE3D); IPR024571 (PFAM); PF17900 (PFAM); G3DSA:2.60.40.1730 (GENE3D); IPR014782 (PFAM); IPR001930 (PANTHER); PTHR11533:SF171 (PANTHER); IPR034016 (CDD); SSF63737 (SUPERFAMILY); SSF55486 (SUPERFAMILY)	P:GO:0006508; F:GO:0008237; F:GO:0008270	P:proteolysis; F:metallopeptidase activity; F:zinc ion binding
maker-Pseudochromosome_1-snap-gene-15.7	related to capsular associated protein	996	0.0	C:GO:0005575	C:cellular_component			IPR006598 (SMART); mobidb-lite (MOBIDB_LITE); mobidb-lite (MOBIDB_LITE); mobidb-lite (MOBIDB_LITE); PTHR12203:SF57 (PANTHER); IPR006598 (PANTHER); NON_CYTOPLASMIC_DOMAIN (PHOBIUS); NON_CYTOPLASMIC_DOMAIN (PHOBIUS); TRANSMEMBRANE (PHOBIUS); TRANSMEMBRANE (PHOBIUS); TRANSMEMBRANE (PHOBIUS); TRANSMEMBRANE (PHOBIUS); CYTOPLASMIC_DOMAIN (PHOBIUS); CYTOPLASMIC_DOMAIN (PHOBIUS); CYTOPLASMIC_DOMAIN (PHOB…	no GO terms	no GO terms
snap_masked-Pseudochromosome_1-processed-gene-1.61	related to Rtm1p	310	0.0	C:GO:0005575	C:cellular_component			IPR007568 (PFAM); PTHR31465:SF1 (PANTHER); IPR007568 (PANTHER); NON_CYTOPLASMIC_DOMAIN (PHOBIUS); TRANSMEMBRANE (PHOBIUS); TRANSMEMBRANE (PHOBIUS); CYTOPLASMIC_DOMAIN (PHOBIUS); TRANSMEMBRANE (PHOBIUS); NON_CYTOPLASMIC_DOMAIN (PHOBIUS); CYTOPLASMIC_DOMAIN (PHOBIUS); CYTOPLASMIC_DOMAIN (PHOBIUS); CYTOPLASMIC_DOMAIN (PHOBIUS); TRANSMEMBRANE (PHOBIUS); NON_CYTOPLASMIC_DOMAIN (PHOBIUS); NON_CYTOPLASM…	C:GO:0016021	C:integral component of membrane
genemark-Pseudochromosome_1-processed-gene-13.8	hypothetical protein FVEG_09559	741	0.0					mobidb-lite (MOBIDB_LITE); mobidb-lite (MOBIDB_LITE); mobidb-lite (MOBIDB_LITE); mobidb-lite (MOBIDB_LITE); mobidb-lite (MOBIDB_LITE); mobidb-lite (MOBIDB_LITE); mobidb-lite (MOBIDB_LITE); mobidb-lite (MOBIDB_LITE)	no GO terms	no GO terms
genemark-Pseudochromosome_1-processed-gene-7.25	ER lumen protein retaining receptor	215	6.17859E-155	F:GO:0003674; C:GO:0005737; C:GO:0005783; P:GO:0016192	F:molecular_function; C:cytoplasm; C:endoplasmic reticulum; P:vesicle-mediated transport			IPR000133 (PRINTS); IPR000133 (PFAM); IPR000133 (PANTHER); PTHR10585:SF14 (PANTHER); TRANSMEMBRANE (PHOBIUS); CYTOPLASMIC_DOMAIN (PHOBIUS); NON_CYTOPLASMIC_DOMAIN (PHOBIUS); TRANSMEMBRANE (PHOBIUS); NON_CYTOPLASMIC_DOMAIN (PHOBIUS); TRANSMEMBRANE (PHOBIUS); TRANSMEMBRANE (PHOBIUS); TRANSMEMBRANE (PHOBIUS); CYTOPLASMIC_DOMAIN (PHOBIUS); NON_CYTOPLASMIC_DOMAIN (PHOBIUS); CYTOPLASMIC_DOMAIN (PHOBIUS…	P:GO:0006621; C:GO:0016021; F:GO:0046923	P:protein retention in ER lumen; C:integral component of membrane; F:ER retention sequence binding
snap_masked-Pseudochromosome_1-processed-gene-4.82	related to integral membrane protein	126	2.8615E-80	C:GO:0005575	C:cellular_component			IPR025363 (PFAM); CYTOPLASMIC_DOMAIN (PHOBIUS); SIGNAL_PEPTIDE_N_REGION (PHOBIUS); SIGNAL_PEPTIDE_C_REGION (PHOBIUS); TRANSMEMBRANE (PHOBIUS); SIGNAL_PEPTIDE_H_REGION (PHOBIUS); NON_CYTOPLASMIC_DOMAIN (PHOBIUS); TRANSMEMBRANE (PHOBIUS); TRANSMEMBRANE (PHOBIUS); SIGNAL_PEPTIDE (PHOBIUS); CYTOPLASMIC_DOMAIN (PHOBIUS); NON_CYTOPLASMIC_DOMAIN (PHOBIUS); TMhelix (TMHMM); TMhelix (TMHMM); TMhelix (TMHM…	no GO terms	no GO terms
snap_masked-Pseudochromosome_1-processed-gene-15.38	hypothetical protein FOVG_01689	97	9.75218E-47					mobidb-lite (MOBIDB_LITE); mobidb-lite (MOBIDB_LITE); mobidb-lite (MOBIDB_LITE)	no GO terms	no GO terms
genemark-Pseudochromosome_1-processed-gene-9.7	hypothetical protein FOMG_00373	666	0.0					mobidb-lite (MOBIDB_LITE); mobidb-lite (MOBIDB_LITE); mobidb-lite (MOBIDB_LITE); mobidb-lite (MOBIDB_LITE); mobidb-lite (MOBIDB_LITE); mobidb-lite (MOBIDB_LITE); SIGNAL_PEPTIDE_H_REGION (PHOBIUS); SIGNAL_PEPTIDE (PHOBIUS); SIGNAL_PEPTIDE_C_REGION (PHOBIUS); SIGNAL_PEPTIDE_N_REGION (PHOBIUS); NON_CYTOPLASMIC_DOMAIN (PHOBIUS); SignalP-noTM (SIGNALP_EUK); SignalP-TM (SIGNALP_GRAM_POSITIVE); SignalP-…	no GO terms	no GO terms
snap_masked-Pseudochromosome_1-processed-gene-3.59	related to 2,4-dienoyl-CoA reductase precursor	232	7.06135E-146	F:GO:0016491	F:oxidoreductase activity			G3DSA:3.40.50.720 (GENE3D); PTHR43981 (PANTHER); IPR036291 (SUPERFAMILY)	no GO terms	no GO terms
snap_masked-Pseudochromosome_1-processed-gene-5.74	alcohol dehydrogenase (NADP+)	361	0.0	F:GO:0016491; F:GO:0043167	F:oxidoreductase activity; F:ion binding			IPR013154 (PFAM); IPR013149 (PFAM); G3DSA:3.90.180.10 (GENE3D); G3DSA:3.40.50.720 (GENE3D); PTHR42683 (PANTHER); PTHR42683:SF9 (PANTHER); cd05283 (CDD); IPR036291 (SUPERFAMILY); IPR011032 (SUPERFAMILY)	P:GO:0055114	P:oxidation-reduction process
genemark-Pseudochromosome_1-processed-gene-7.19	related to triacylglycerol lipase	343	0.0	F:GO:0003674; C:GO:0005575	F:molecular_function; C:cellular_component			IPR029058 (G3DSA:3.40.50.GENE3D); IPR013094 (PFAM); PTHR23024:SF245 (PANTHER); PTHR23024 (PANTHER); TRANSMEMBRANE (PHOBIUS); NON_CYTOPLASMIC_DOMAIN (PHOBIUS); CYTOPLASMIC_DOMAIN (PHOBIUS); IPR029058 (SUPERFAMILY)	F:GO:0016787	F:hydrolase activity
maker-Pseudochromosome_1-augustus-gene-15.9	hypothetical protein FVEG_16605, partial	163	1.72492E-36					no IPS match	no IPS match	no IPS match
maker-Pseudochromosome_1-snap-gene-1.8	hypothetical protein FOIG_16590	380	0.0	C:GO:0005575	C:cellular_component			PTHR33048 (PANTHER); TRANSMEMBRANE (PHOBIUS); TRANSMEMBRANE (PHOBIUS); CYTOPLASMIC_DOMAIN (PHOBIUS); TRANSMEMBRANE (PHOBIUS); CYTOPLASMIC_DOMAIN (PHOBIUS); TRANSMEMBRANE (PHOBIUS); CYTOPLASMIC_DOMAIN (PHOBIUS); TRANSMEMBRANE (PHOBIUS); NON_CYTOPLASMIC_DOMAIN (PHOBIUS); TRANSMEMBRANE (PHOBIUS); NON_CYTOPLASMIC_DOMAIN (PHOBIUS); TRANSMEMBRANE (PHOBIUS); CYTOPLASMIC_DOMAIN (PHOBIUS); NON_CYTOPLASMIC…	no GO terms	no GO terms
genemark-Pseudochromosome_1-processed-gene-5.28	related to nodulin	522	0.0					Coil (COILS); IPR001107 (PFAM); G3DSA:3.30.479.30 (GENE3D); IPR027705 (PANTHER); PTHR13806:SF20 (PANTHER); cd03399 (CDD); IPR036013 (SUPERFAMILY)	no GO terms	no GO terms
genemark-Pseudochromosome_1-processed-gene-12.16	uncharacterized protein LW93_11493	844	0.0	P:GO:0006464; F:GO:0016301; F:GO:0043167	P:cellular protein modification process; F:kinase activity; F:ion binding			mobidb-lite (MOBIDB_LITE); mobidb-lite (MOBIDB_LITE); IPR000719 (PROSITE_PROFILES); IPR011009 (SUPERFAMILY)	F:GO:0004672; F:GO:0005524; P:GO:0006468	F:protein kinase activity; F:ATP binding; P:protein phosphorylation
snap_masked-Pseudochromosome_1-processed-gene-4.91	hypothetical protein FOQG_13101	634	0.0					Coil (COILS); Coil (COILS); IPR009003 (SUPERFAMILY)	no GO terms	no GO terms
genemark-Pseudochromosome_1-processed-gene-3.78	aurofusarin/rubrofusarin efflux pump AFLT	553	0.0	C:GO:0005575; P:GO:0055085	C:cellular_component; P:transmembrane transport			G3DSA:1.20.1250.20 (GENE3D); IPR011701 (PFAM); G3DSA:1.20.1250.20 (GENE3D); mobidb-lite (MOBIDB_LITE); PTHR23501 (PANTHER); PTHR23501:SF12 (PANTHER); CYTOPLASMIC_DOMAIN (PHOBIUS); CYTOPLASMIC_DOMAIN (PHOBIUS); TRANSMEMBRANE (PHOBIUS); TRANSMEMBRANE (PHOBIUS); CYTOPLASMIC_DOMAIN (PHOBIUS); TRANSMEMBRANE (PHOBIUS); CYTOPLASMIC_DOMAIN (PHOBIUS); TRANSMEMBRANE (PHOBIUS); TRANSMEMBRANE (PHOBIUS); NON_…	C:GO:0016021; P:GO:0055085	C:integral component of membrane; P:transmembrane transport
genemark-Pseudochromosome_1-processed-gene-2.113	probable amidases related to nicotinamidase	193	4.21156E-136	F:GO:0003674	F:molecular_function			IPR036380 (G3DSA:3.40.50.GENE3D); IPR000868 (PFAM); PTHR43540 (PANTHER); PTHR43540:SF2 (PANTHER); IPR036380 (SUPERFAMILY)	F:GO:0003824	F:catalytic activity
maker-Pseudochromosome_1-snap-gene-7.1	hypothetical protein FOXG_20438	187	2.54711E-34					no IPS match	no IPS match	no IPS match
genemark-Pseudochromosome_1-processed-gene-6.103	uncharacterized protein FFUJ_01885	222	4.12486E-99					no IPS match	no IPS match	no IPS match
snap_masked-Pseudochromosome_1-processed-gene-12.61	predicted protein [	107	1.0041E-65					mobidb-lite (MOBIDB_LITE); PTHR31184 (PANTHER); IPR038922 (CDD)	no GO terms	no GO terms
maker-Pseudochromosome_1-augustus-gene-5.103	methylated-DNA-protein-cysteine methyltransferase like protein	131	2.36198E-91	F:GO:0003677; P:GO:0006259; P:GO:0006950; F:GO:0008168	F:DNA binding; P:DNA metabolic process; P:response to stress; F:methyltransferase activity			IPR036388 (G3DSA:1.10.10.GENE3D); IPR014048 (PFAM); mobidb-lite (MOBIDB_LITE); mobidb-lite (MOBIDB_LITE); PTHR42942 (PANTHER); IPR014048 (CDD); IPR036217 (SUPERFAMILY)	F:GO:0003824; P:GO:0006281	F:catalytic activity; P:DNA repair
snap_masked-Pseudochromosome_1-processed-gene-8.82	uncharacterized protein FFUJ_01826	499	0.0	C:GO:0005575	C:cellular_component			mobidb-lite (MOBIDB_LITE)	no GO terms	no GO terms
maker-Pseudochromosome_1-snap-gene-3.2	related to transcription factor ZMS1	972	0.0	F:GO:0003677; F:GO:0003700; C:GO:0005634; P:GO:0009058; P:GO:0034641; F:GO:0043167	F:DNA binding; F:DNA-binding transcription factor activity; C:nucleus; P:biosynthetic process; P:cellular nitrogen compound metabolic process; F:ion binding			IPR001138 (SMART); IPR013087 (SMART); G3DSA:3.30.160.60 (GENE3D); IPR001138 (PFAM); IPR036864 (G3DSA:4.10.240.GENE3D); G3DSA:3.30.160.60 (GENE3D); mobidb-lite (MOBIDB_LITE); mobidb-lite (MOBIDB_LITE); mobidb-lite (MOBIDB_LITE); mobidb-lite (MOBIDB_LITE); PTHR40626 (PANTHER); NON_CYTOPLASMIC_DOMAIN (PHOBIUS); TRANSMEMBRANE (PHOBIUS); CYTOPLASMIC_DOMAIN (PHOBIUS); IPR013087 (PROSITE_PROFILES); IPR0…	F:GO:0000981; F:GO:0003676; C:GO:0005634; P:GO:0006355; F:GO:0008270	F:DNA-binding transcription factor activity, RNA polymerase II-specific; F:nucleic acid binding; C:nucleus; P:regulation of transcription, DNA-templated; F:zinc ion binding
snap_masked-Pseudochromosome_1-processed-gene-3.52	probable organic hydroperoxide resistance protein	184	3.00375E-116	P:GO:0006950	P:response to stress			G3DSA:2.20.25.10 (GENE3D); IPR015946 (G3DSA:3.30.300.GENE3D); IPR019953 (TIGRFAM); IPR003718 (PFAM); mobidb-lite (MOBIDB_LITE); IPR019953 (PANTHER); IPR036102 (SUPERFAMILY)	P:GO:0006979	P:response to oxidative stress
genemark-Pseudochromosome_1-processed-gene-12.44	related to glucose-6-phosphate/phosphate translocator	371	0.0	C:GO:0005575	C:cellular_component			IPR004853 (PFAM); mobidb-lite (MOBIDB_LITE); mobidb-lite (MOBIDB_LITE); mobidb-lite (MOBIDB_LITE); PTHR44010 (PANTHER); PTHR44010:SF4 (PANTHER); NON_CYTOPLASMIC_DOMAIN (PHOBIUS); TRANSMEMBRANE (PHOBIUS); CYTOPLASMIC_DOMAIN (PHOBIUS); TRANSMEMBRANE (PHOBIUS); CYTOPLASMIC_DOMAIN (PHOBIUS); NON_CYTOPLASMIC_DOMAIN (PHOBIUS); NON_CYTOPLASMIC_DOMAIN (PHOBIUS); CYTOPLASMIC_DOMAIN (PHOBIUS); CYTOPLASMIC_…	no GO terms	no GO terms
genemark-Pseudochromosome_1-processed-gene-15.74	membrane-associating protein	178	1.3011E-109	C:GO:0005575	C:cellular_component			IPR008253 (PFAM); PTHR37451 (PANTHER); PTHR37451:SF2 (PANTHER); NON_CYTOPLASMIC_DOMAIN (PHOBIUS); TRANSMEMBRANE (PHOBIUS); NON_CYTOPLASMIC_DOMAIN (PHOBIUS); CYTOPLASMIC_DOMAIN (PHOBIUS); SIGNAL_PEPTIDE_C_REGION (PHOBIUS); SIGNAL_PEPTIDE (PHOBIUS); SIGNAL_PEPTIDE_H_REGION (PHOBIUS); TRANSMEMBRANE (PHOBIUS); SIGNAL_PEPTIDE_N_REGION (PHOBIUS); SignalP-TM (SIGNALP_GRAM_POSITIVE); SignalP-TM (SIGNALP_…	C:GO:0016020	C:membrane
genemark-Pseudochromosome_1-processed-gene-11.109	related to plasma membrane phosphatase required for sodium stress response	496	0.0	F:GO:0016791	F:phosphatase activity			IPR004274 (SMART); IPR011948 (TIGRFAM); IPR023214 (G3DSA:3.40.50.GENE3D); IPR004274 (PFAM); mobidb-lite (MOBIDB_LITE); mobidb-lite (MOBIDB_LITE); mobidb-lite (MOBIDB_LITE); mobidb-lite (MOBIDB_LITE); mobidb-lite (MOBIDB_LITE); mobidb-lite (MOBIDB_LITE); mobidb-lite (MOBIDB_LITE); PTHR12210:SF29 (PANTHER); PTHR12210 (PANTHER); IPR004274 (PROSITE_PROFILES); cd07521 (CDD); IPR036412 (SUPERFAMILY)	F:GO:0016791	F:phosphatase activity
maker-Pseudochromosome_1-snap-gene-10.6	uncharacterized protein FPRO_00351	106	8.45162E-7					no IPS match	no IPS match	no IPS match
snap_masked-Pseudochromosome_1-processed-gene-5.65	related to mei2 protein	66	4.04792E-20	F:GO:0003676; F:GO:0003723	F:nucleic acid binding; F:RNA binding			no IPS match	no IPS match	no IPS match
genemark-Pseudochromosome_1-processed-gene-13.18	related to nucleolar phosphoprotein	663	0.0	F:GO:0003723; P:GO:0034655	F:RNA binding; P:nucleobase-containing compound catabolic process			IPR000504 (SMART); IPR000504 (PFAM); IPR012677 (G3DSA:3.30.70.GENE3D); IPR012677 (G3DSA:3.30.70.GENE3D); IPR005120 (PFAM); mobidb-lite (MOBIDB_LITE); mobidb-lite (MOBIDB_LITE); mobidb-lite (MOBIDB_LITE); mobidb-lite (MOBIDB_LITE); mobidb-lite (MOBIDB_LITE); mobidb-lite (MOBIDB_LITE); mobidb-lite (MOBIDB_LITE); mobidb-lite (MOBIDB_LITE); mobidb-lite (MOBIDB_LITE); mobidb-lite (MOBIDB_LITE); mobidb…	P:GO:0000184; F:GO:0003676	P:nuclear-transcribed mRNA catabolic process, nonsense-mediated decay; F:nucleic acid binding
maker-Pseudochromosome_1-snap-gene-13.85	zinc finger protein	718	0.0	F:GO:0043167	F:ion binding			IPR004457 (SMART); IPR004457 (PFAM); IPR004457 (TIGRFAM); IPR007175 (PFAM); G3DSA:2.20.25.420 (GENE3D); G3DSA:2.20.25.420 (GENE3D); G3DSA:2.60.120.1040 (GENE3D); G3DSA:2.60.120.1040 (GENE3D); mobidb-lite (MOBIDB_LITE); mobidb-lite (MOBIDB_LITE); mobidb-lite (MOBIDB_LITE); mobidb-lite (MOBIDB_LITE); mobidb-lite (MOBIDB_LITE); mobidb-lite (MOBIDB_LITE); IPR040141 (PANTHER)	F:GO:0008270	F:zinc ion binding
genemark-Pseudochromosome_1-processed-gene-9.25	hypothetical protein FOC4_g10007329	78	3.99706E-43					mobidb-lite (MOBIDB_LITE)	no GO terms	no GO terms
genemark-Pseudochromosome_1-processed-gene-4.17	related to allantoate permease	486	0.0	C:GO:0005575; P:GO:0055085	C:cellular_component; P:transmembrane transport			G3DSA:1.20.1250.20 (GENE3D); G3DSA:1.20.1250.20 (GENE3D); IPR011701 (PFAM); PTHR43791:SF57 (PANTHER); PTHR43791 (PANTHER); CYTOPLASMIC_DOMAIN (PHOBIUS); TRANSMEMBRANE (PHOBIUS); NON_CYTOPLASMIC_DOMAIN (PHOBIUS); NON_CYTOPLASMIC_DOMAIN (PHOBIUS); CYTOPLASMIC_DOMAIN (PHOBIUS); CYTOPLASMIC_DOMAIN (PHOBIUS); TRANSMEMBRANE (PHOBIUS); TRANSMEMBRANE (PHOBIUS); NON_CYTOPLASMIC_DOMAIN (PHOBIUS); TRANSMEMB…	C:GO:0016021; P:GO:0055085	C:integral component of membrane; P:transmembrane transport
augustus_masked-Pseudochromosome_1-processed-gene-9.61	uncharacterized protein FFB14_11724	761	0.0	C:GO:0005575; F:GO:0019899	C:cellular_component; F:enzyme binding			Coil (COILS); Coil (COILS); Coil (COILS); mobidb-lite (MOBIDB_LITE); mobidb-lite (MOBIDB_LITE); mobidb-lite (MOBIDB_LITE); mobidb-lite (MOBIDB_LITE); NON_CYTOPLASMIC_DOMAIN (PHOBIUS); SIGNAL_PEPTIDE_C_REGION (PHOBIUS); SIGNAL_PEPTIDE_N_REGION (PHOBIUS); SIGNAL_PEPTIDE (PHOBIUS); SIGNAL_PEPTIDE_H_REGION (PHOBIUS)	no GO terms	no GO terms
snap_masked-Pseudochromosome_1-processed-gene-6.60	hypothetical protein AU210_000243	221	4.30517E-75					no IPS match	no IPS match	no IPS match
snap_masked-Pseudochromosome_1-processed-gene-7.65	related to PIN4 FHA1 domain-interacting protein modulates DNA damage tolerance and G(2)/M cell cycle progression	629	0.0	F:GO:0003723	F:RNA binding			Coil (COILS); IPR001374 (SMART); IPR000504 (SMART); IPR000504 (PFAM); IPR012677 (G3DSA:3.30.70.GENE3D); IPR001374 (PFAM); IPR036867 (G3DSA:3.30.1370.GENE3D); mobidb-lite (MOBIDB_LITE); mobidb-lite (MOBIDB_LITE); mobidb-lite (MOBIDB_LITE); mobidb-lite (MOBIDB_LITE); mobidb-lite (MOBIDB_LITE); mobidb-lite (MOBIDB_LITE); mobidb-lite (MOBIDB_LITE); mobidb-lite (MOBIDB_LITE); PTHR23003 (PANTHER); PTHR…	F:GO:0003676	F:nucleic acid binding
genemark-Pseudochromosome_1-processed-gene-11.83	DASH complex subunit DAD2	143	4.83019E-95	C:GO:0000228; P:GO:0000278; C:GO:0005856; C:GO:0032991	C:nuclear chromosome; P:mitotic cell cycle; C:cytoskeleton; C:protein-containing complex			Coil (COILS); IPR013963 (PFAM); mobidb-lite (MOBIDB_LITE); IPR013963 (PANTHER); SignalP-TM (SIGNALP_GRAM_POSITIVE)	P:GO:0000278; C:GO:0042729; C:GO:0072686	P:mitotic cell cycle; C:DASH complex; C:mitotic spindle
genemark-Pseudochromosome_1-processed-gene-5.5	related to cholinesterase	586	0.0					IPR002018 (PFAM); IPR029058 (G3DSA:3.40.50.GENE3D); PTHR11559:SF240 (PANTHER); PTHR11559 (PANTHER); SIGNAL_PEPTIDE_H_REGION (PHOBIUS); NON_CYTOPLASMIC_DOMAIN (PHOBIUS); SIGNAL_PEPTIDE_N_REGION (PHOBIUS); SIGNAL_PEPTIDE_C_REGION (PHOBIUS); SIGNAL_PEPTIDE (PHOBIUS); SignalP-noTM (SIGNALP_EUK); IPR029058 (SUPERFAMILY); TMhelix (TMHMM)	no GO terms	no GO terms
genemark-Pseudochromosome_1-processed-gene-1.37	related to ABC-type Fe3+ transport system, periplasmic component	318	0.0					G3DSA:3.40.190.10 (GENE3D); G3DSA:3.40.190.10 (GENE3D); PTHR30006 (PANTHER); PTHR30006:SF2 (PANTHER); PTHR30006 (PANTHER); PTHR30006:SF2 (PANTHER); SIGNAL_PEPTIDE (PHOBIUS); SIGNAL_PEPTIDE_H_REGION (PHOBIUS); SIGNAL_PEPTIDE_C_REGION (PHOBIUS); SIGNAL_PEPTIDE_N_REGION (PHOBIUS); NON_CYTOPLASMIC_DOMAIN (PHOBIUS); SignalP-noTM (SIGNALP_EUK); SignalP-noTM (SIGNALP_GRAM_NEGATIVE); SSF53850 (SUPERFAMIL…	no GO terms	no GO terms
genemark-Pseudochromosome_1-processed-gene-16.63	FK506-binding protein 2	270	3.4112E-131	C:GO:0005783; P:GO:0006464; F:GO:0016853	C:endoplasmic reticulum; P:cellular protein modification process; F:isomerase activity	EC:5.2.1.8	Peptidylprolyl isomerase	IPR001179 (PFAM); G3DSA:3.10.50.40 (GENE3D); IPR023566 (PANTHER); PTHR10516:SF347 (PANTHER); IPR001179 (PROSITE_PROFILES); SSF54534 (SUPERFAMILY)	no GO terms	no GO terms
genemark-Pseudochromosome_1-processed-gene-1.59	related to tol protein	845	0.0					IPR010730 (PFAM); PTHR33112 (PANTHER); PTHR33112:SF6 (PANTHER)	no GO terms	no GO terms
augustus_masked-Pseudochromosome_1-processed-gene-1.129	hypothetical protein FOXB_06443	1047	0.0					no IPS match	no IPS match	no IPS match
genemark-Pseudochromosome_1-processed-gene-15.68	related to D-ribulokinase	600	0.0	P:GO:0005975; F:GO:0016301; P:GO:0044281	P:carbohydrate metabolic process; F:kinase activity; P:small molecule metabolic process	EC:2.7.1.47	D-ribulokinase	IPR018484 (PFAM); G3DSA:3.30.420.460 (GENE3D); IPR006003 (TIGRFAM); IPR018485 (PFAM); G3DSA:3.30.420.40 (GENE3D); PTHR43435:SF4 (PANTHER); PTHR43435 (PANTHER); IPR006003 (CDD); SSF53067 (SUPERFAMILY); SSF53067 (SUPERFAMILY)	P:GO:0005975; F:GO:0016773	P:carbohydrate metabolic process; F:phosphotransferase activity, alcohol group as acceptor
genemark-Pseudochromosome_1-processed-gene-3.101	related to cytochrome P450 monooxygenase	496	0.0	C:GO:0005575; F:GO:0016491; F:GO:0043167	C:cellular_component; F:oxidoreductase activity; F:ion binding			IPR002403 (PRINTS); IPR036396 (G3DSA:1.10.630.GENE3D); IPR001128 (PFAM); PTHR24279 (PANTHER); PTHR24279:SF87 (PANTHER); TRANSMEMBRANE (PHOBIUS); CYTOPLASMIC_DOMAIN (PHOBIUS); NON_CYTOPLASMIC_DOMAIN (PHOBIUS); IPR036396 (SUPERFAMILY); TMhelix (TMHMM)	F:GO:0004497; F:GO:0005506; F:GO:0016705; F:GO:0020037; P:GO:0055114	F:monooxygenase activity; F:iron ion binding; F:oxidoreductase activity, acting on paired donors, with incorporation or reduction of molecular oxygen; F:heme binding; P:oxidation-reduction process
genemark-Pseudochromosome_1-processed-gene-9.19	PiT family inorganic phosphate transporter	555	0.0	C:GO:0005575; F:GO:0022857	C:cellular_component; F:transmembrane transporter activity			IPR001204 (PFAM); PTHR11101:SF80 (PANTHER); IPR001204 (PANTHER); CYTOPLASMIC_DOMAIN (PHOBIUS); CYTOPLASMIC_DOMAIN (PHOBIUS); NON_CYTOPLASMIC_DOMAIN (PHOBIUS); CYTOPLASMIC_DOMAIN (PHOBIUS); TRANSMEMBRANE (PHOBIUS); TRANSMEMBRANE (PHOBIUS); TRANSMEMBRANE (PHOBIUS); TRANSMEMBRANE (PHOBIUS); NON_CYTOPLASMIC_DOMAIN (PHOBIUS); NON_CYTOPLASMIC_DOMAIN (PHOBIUS); TRANSMEMBRANE (PHOBIUS); CYTOPLASMIC_DOMAI…	F:GO:0005315; P:GO:0006817; C:GO:0016020	F:inorganic phosphate transmembrane transporter activity; P:phosphate ion transport; C:membrane
snap_masked-Pseudochromosome_1-processed-gene-2.41	uncharacterized protein FMAN_00126	125	3.71969E-71					mobidb-lite (MOBIDB_LITE)	no GO terms	no GO terms
genemark-Pseudochromosome_1-processed-gene-11.77	uncharacterized protein LW94_7145	585	0.0	C:GO:0005575	C:cellular_component			IPR029033 (G3DSA:3.40.50.GENE3D); IPR000560 (PFAM); mobidb-lite (MOBIDB_LITE); mobidb-lite (MOBIDB_LITE); mobidb-lite (MOBIDB_LITE); PTHR11567 (PANTHER); PTHR11567:SF142 (PANTHER); NON_CYTOPLASMIC_DOMAIN (PHOBIUS); SIGNAL_PEPTIDE_H_REGION (PHOBIUS); SIGNAL_PEPTIDE (PHOBIUS); SIGNAL_PEPTIDE_C_REGION (PHOBIUS); CYTOPLASMIC_DOMAIN (PHOBIUS); SIGNAL_PEPTIDE_N_REGION (PHOBIUS); TRANSMEMBRANE (PHOBIUS)…	no GO terms	no GO terms
maker-Pseudochromosome_1-snap-gene-8.93	related to methyltransferase	389	0.0	F:GO:0008168	F:methyltransferase activity			G3DSA:3.40.50.150 (GENE3D); PF13489 (PFAM); mobidb-lite (MOBIDB_LITE); mobidb-lite (MOBIDB_LITE); PTHR43591 (PANTHER); PTHR43591:SF10 (PANTHER); cd02440 (CDD); IPR029063 (SUPERFAMILY)	no GO terms	no GO terms
genemark-Pseudochromosome_1-processed-gene-10.16	ubiquitin conjugation factor E4 B	1093	0.0	F:GO:0003674; C:GO:0005622; P:GO:0006464; P:GO:0009056; C:GO:0032991	F:molecular_function; C:intracellular; P:cellular protein modification process; P:catabolic process; C:protein-containing complex			Coil (COILS); Coil (COILS); Coil (COILS); IPR003613 (SMART); IPR013083 (G3DSA:3.30.40.GENE3D); IPR019474 (PFAM); IPR003613 (PFAM); mobidb-lite (MOBIDB_LITE); mobidb-lite (MOBIDB_LITE); mobidb-lite (MOBIDB_LITE); mobidb-lite (MOBIDB_LITE); mobidb-lite (MOBIDB_LITE); PTHR13931 (PANTHER); PTHR13931:SF2 (PANTHER); IPR003613 (PROSITE_PROFILES); SSF57850 (SUPERFAMILY)	C:GO:0000151; F:GO:0004842; P:GO:0006511; P:GO:0016567; F:GO:0034450	C:ubiquitin ligase complex; F:ubiquitin-protein transferase activity; P:ubiquitin-dependent protein catabolic process; P:protein ubiquitination; F:ubiquitin-ubiquitin ligase activity
snap_masked-Pseudochromosome_1-processed-gene-14.61	-No description-	63						no IPS match	no IPS match	no IPS match
genemark-Pseudochromosome_1-processed-gene-2.82	related to tol protein	691	0.0					IPR010730 (PFAM); PTHR33112:SF6 (PANTHER); PTHR33112 (PANTHER)	no GO terms	no GO terms
snap_masked-Pseudochromosome_1-processed-gene-31.48	TdcF protein	153	8.48682E-100					IPR006175 (PFAM); IPR035959 (G3DSA:3.30.1330.GENE3D); IPR006056 (TIGRFAM); IPR006175 (PANTHER); PTHR11803:SF33 (PANTHER); cd00448 (CDD); IPR035959 (SUPERFAMILY)	no GO terms	no GO terms
genemark-Pseudochromosome_1-processed-gene-27.14	related to thioredoxin-like protein	325	0.0	C:GO:0005623; P:GO:0042592	C:cell; P:homeostatic process			IPR010400 (PFAM); IPR037047 (G3DSA:2.60.120.GENE3D); G3DSA:3.40.30.10 (GENE3D); IPR013766 (PFAM); mobidb-lite (MOBIDB_LITE); PTHR12175 (PANTHER); PTHR12175:SF5 (PANTHER); IPR013766 (PROSITE_PROFILES); IPR010400 (PROSITE_PROFILES); cd02947 (CDD); IPR008979 (SUPERFAMILY); IPR036249 (SUPERFAMILY)	P:GO:0045454	P:cell redox homeostasis
genemark-Pseudochromosome_1-processed-gene-29.89	amino-acid transporter Arg-13	331	0.0	C:GO:0005575; F:GO:0022857	C:cellular_component; F:transmembrane transporter activity			IPR018108 (PFAM); IPR023395 (G3DSA:1.50.40.GENE3D); IPR023395 (G3DSA:1.50.40.GENE3D); IPR040062 (PANTHER); PTHR24089:SF651 (PANTHER); IPR018108 (PROSITE_PROFILES); IPR018108 (PROSITE_PROFILES); IPR018108 (PROSITE_PROFILES); IPR023395 (SUPERFAMILY)	F:GO:0022857	F:transmembrane transporter activity
genemark-Pseudochromosome_1-processed-gene-20.11	related to Zn(II)2Cys6 transcriptional activator	859	0.0	F:GO:0003677; F:GO:0003700; C:GO:0005634; P:GO:0009058; P:GO:0034641; F:GO:0043167	F:DNA binding; F:DNA-binding transcription factor activity; C:nucleus; P:biosynthetic process; P:cellular nitrogen compound metabolic process; F:ion binding			IPR001138 (SMART); IPR007219 (SMART); IPR036864 (G3DSA:4.10.240.GENE3D); IPR001138 (PFAM); IPR007219 (PFAM); mobidb-lite (MOBIDB_LITE); mobidb-lite (MOBIDB_LITE); PTHR31313 (PANTHER); PTHR31313:SF42 (PANTHER); IPR001138 (PROSITE_PROFILES); IPR001138 (CDD); cd14653 (CDD); cd12148 (CDD); IPR036864 (SUPERFAMILY)	F:GO:0000981; F:GO:0003677; C:GO:0005634; P:GO:0006351; P:GO:0006355; F:GO:0008270	F:DNA-binding transcription factor activity, RNA polymerase II-specific; F:DNA binding; C:nucleus; P:transcription, DNA-templated; P:regulation of transcription, DNA-templated; F:zinc ion binding
maker-Pseudochromosome_1-augustus-gene-27.10	hypothetical protein FPRO05_12749	671	0.0	C:GO:0005575	C:cellular_component			IPR001173 (PFAM); mobidb-lite (MOBIDB_LITE); PTHR36851 (PANTHER); TRANSMEMBRANE (PHOBIUS); TRANSMEMBRANE (PHOBIUS); CYTOPLASMIC_DOMAIN (PHOBIUS); TRANSMEMBRANE (PHOBIUS); CYTOPLASMIC_DOMAIN (PHOBIUS); CYTOPLASMIC_DOMAIN (PHOBIUS); TRANSMEMBRANE (PHOBIUS); NON_CYTOPLASMIC_DOMAIN (PHOBIUS); NON_CYTOPLASMIC_DOMAIN (PHOBIUS); IPR029044 (SUPERFAMILY); TMhelix (TMHMM); TMhelix (TMHMM)	no GO terms	no GO terms
snap_masked-Pseudochromosome_1-processed-gene-19.74	pre-mRNA-splicing factor clf-1	674	0.0	F:GO:0003677; C:GO:0005634; C:GO:0005694; P:GO:0006259; P:GO:0006397; P:GO:0009058; P:GO:0022618; C:GO:0032991	F:DNA binding; C:nucleus; C:chromosome; P:DNA metabolic process; P:mRNA processing; P:biosynthetic process; P:ribonucleoprotein complex assembly; C:protein-containing complex			Coil (COILS); IPR003107 (SMART); IPR003107 (PFAM); IPR011990 (G3DSA:1.25.40.GENE3D); PF14559 (PFAM); PTHR11246 (PANTHER); PTHR11246:SF3 (PANTHER); IPR019734 (PROSITE_PROFILES); IPR013026 (PROSITE_PROFILES); IPR019734 (PROSITE_PROFILES); IPR013026 (PROSITE_PROFILES); IPR013026 (PROSITE_PROFILES); IPR019734 (PROSITE_PROFILES); IPR019734 (PROSITE_PROFILES); IPR019734 (PROSITE_PROFILES); IPR011990 (S…	F:GO:0005515; P:GO:0006396	F:protein binding; P:RNA processing
genemark-Pseudochromosome_1-processed-gene-25.73	DNA repair protein rhp51	348	0.0	P:GO:0000003; P:GO:0000278; F:GO:0003677; C:GO:0005634; C:GO:0005694; P:GO:0006259; P:GO:0006950; P:GO:0009058; F:GO:0016887; P:GO:0030154; P:GO:0042592; F:GO:0043167; P:GO:0051276; P:GO:0065003	P:reproduction; P:mitotic cell cycle; F:DNA binding; C:nucleus; C:chromosome; P:DNA metabolic process; P:response to stress; P:biosynthetic process; F:ATPase activity; P:cell differentiation; P:homeostatic process; F:ion binding; P:chromosome organization; P:protein-containing complex assembly	EC:3.6.1.3; EC:3.6.1.15	Adenosinetriphosphatase; Nucleoside-triphosphate phosphatase	IPR003593 (SMART); IPR011941 (TIGRFAM); IPR013632 (PFAM); G3DSA:3.40.50.300 (GENE3D); IPR016467 (PIRSF); G3DSA:1.10.150.20 (GENE3D); mobidb-lite (MOBIDB_LITE); PTHR22942:SF39 (PANTHER); PTHR22942 (PANTHER); IPR020588 (PROSITE_PROFILES); IPR020587 (PROSITE_PROFILES); IPR033925 (CDD); IPR010995 (SUPERFAMILY); IPR027417 (SUPERFAMILY)	F:GO:0000150; F:GO:0000166; P:GO:0000724; F:GO:0003677; F:GO:0003690; F:GO:0003697; F:GO:0005524; P:GO:0006259; P:GO:0006281; F:GO:0008094; P:GO:1990426	F:recombinase activity; F:nucleotide binding; P:double-strand break repair via homologous recombination; F:DNA binding; F:double-stranded DNA binding; F:single-stranded DNA binding; F:ATP binding; P:DNA metabolic process; P:DNA repair; F:DNA-dependent ATPase activity; P:mitotic recombination-dependent replication fork processing
genemark-Pseudochromosome_1-processed-gene-22.34	Replication factor C subunit 2	382	0.0	P:GO:0000278; F:GO:0003677; C:GO:0005694; P:GO:0006259; P:GO:0006950; P:GO:0009058; C:GO:0032991; F:GO:0043167	P:mitotic cell cycle; F:DNA binding; C:chromosome; P:DNA metabolic process; P:response to stress; P:biosynthetic process; C:protein-containing complex; F:ion binding			IPR003593 (SMART); IPR013748 (PFAM); IPR003959 (PFAM); G3DSA:1.20.272.10 (GENE3D); G3DSA:1.10.8.60 (GENE3D); G3DSA:3.40.50.300 (GENE3D); mobidb-lite (MOBIDB_LITE); PTHR11669:SF20 (PANTHER); PTHR11669 (PANTHER); cd00009 (CDD); IPR008921 (SUPERFAMILY); IPR027417 (SUPERFAMILY)	F:GO:0003677; F:GO:0005524; P:GO:0006260	F:DNA binding; F:ATP binding; P:DNA replication
genemark-Pseudochromosome_1-processed-gene-22.15	ubiquitin thiolesterase	732	0.0	P:GO:0006464; F:GO:0008233; P:GO:0009056	P:cellular protein modification process; F:peptidase activity; P:catabolic process	EC:3.4.19.12	Ubiquitinyl hydrolase 1	Coil (COILS); Coil (COILS); G3DSA:3.90.70.10 (GENE3D); IPR001394 (PFAM); mobidb-lite (MOBIDB_LITE); mobidb-lite (MOBIDB_LITE); mobidb-lite (MOBIDB_LITE); mobidb-lite (MOBIDB_LITE); mobidb-lite (MOBIDB_LITE); mobidb-lite (MOBIDB_LITE); PTHR43942:SF6 (PANTHER); PTHR43942 (PANTHER); PTHR43942 (PANTHER); PTHR43942:SF6 (PANTHER); IPR028889 (PROSITE_PROFILES); cd02663 (CDD); IPR038765 (SUPERFAMILY)	P:GO:0016579; F:GO:0036459	P:protein deubiquitination; F:thiol-dependent ubiquitinyl hydrolase activity
genemark-Pseudochromosome_1-processed-gene-25.92	uncharacterized protein Y057_14003	373	0.0	C:GO:0005575	C:cellular_component			mobidb-lite (MOBIDB_LITE); mobidb-lite (MOBIDB_LITE); mobidb-lite (MOBIDB_LITE); mobidb-lite (MOBIDB_LITE); mobidb-lite (MOBIDB_LITE); mobidb-lite (MOBIDB_LITE); mobidb-lite (MOBIDB_LITE); mobidb-lite (MOBIDB_LITE); NON_CYTOPLASMIC_DOMAIN (PHOBIUS); TRANSMEMBRANE (PHOBIUS); CYTOPLASMIC_DOMAIN (PHOBIUS); TMhelix (TMHMM)	no GO terms	no GO terms
genemark-Pseudochromosome_1-processed-gene-20.22	related to AAC-rich mRNA clone AAC3 protein	271	0.0	F:GO:0003674; C:GO:0005634; P:GO:0006913; C:GO:0032991	F:molecular_function; C:nucleus; P:nucleocytoplasmic transport; C:protein-containing complex			IPR020472 (PRINTS); IPR001680 (SMART); IPR015943 (G3DSA:2.130.10.GENE3D); IPR015943 (G3DSA:2.130.10.GENE3D); IPR001680 (PFAM); IPR040132 (PANTHER); IPR001680 (PROSITE_PROFILES); IPR001680 (PROSITE_PROFILES); IPR001680 (PROSITE_PROFILES); IPR017986 (PROSITE_PROFILES); IPR036322 (SUPERFAMILY)	C:GO:0000346; F:GO:0005515; P:GO:0006406	C:transcription export complex; F:protein binding; P:mRNA export from nucleus
snap_masked-Pseudochromosome_1-processed-gene-21.60	Molybdopterin synthase sulfur carrier subunit	96	2.20975E-61	F:GO:0003735; C:GO:0005829; C:GO:0005840; C:GO:0005856; P:GO:0006412; P:GO:0051186	F:structural constituent of ribosome; C:cytosol; C:ribosome; C:cytoskeleton; P:translation; P:cofactor metabolic process	EC:2.8.1.12	Molybdopterin synthase	IPR012675 (G3DSA:3.10.20.GENE3D); IPR003749 (PFAM); PTHR33359 (PANTHER); IPR028887 (HAMAP); cd00754 (CDD); IPR016155 (SUPERFAMILY)	C:GO:0005829; P:GO:0006777	C:cytosol; P:Mo-molybdopterin cofactor biosynthetic process
genemark-Pseudochromosome_1-processed-gene-24.79	hypothetical protein FNYG_08992	637	0.0	F:GO:0003723	F:RNA binding			IPR000504 (SMART); G3DSA:3.10.590.10 (GENE3D); IPR012677 (G3DSA:3.30.70.GENE3D); G3DSA:3.10.590.10 (GENE3D); IPR007275 (PFAM); mobidb-lite (MOBIDB_LITE); mobidb-lite (MOBIDB_LITE); mobidb-lite (MOBIDB_LITE); mobidb-lite (MOBIDB_LITE); PTHR12357 (PANTHER); PTHR12357:SF3 (PANTHER); IPR007275 (PROSITE_PROFILES); cd00590 (CDD); IPR035979 (SUPERFAMILY)	F:GO:0003676; F:GO:0003723	F:nucleic acid binding; F:RNA binding
snap_masked-Pseudochromosome_1-processed-gene-21.71	uncharacterized protein FFUJ_01460	571	0.0					IPR028094 (SMART); IPR028094 (PFAM); mobidb-lite (MOBIDB_LITE); mobidb-lite (MOBIDB_LITE); mobidb-lite (MOBIDB_LITE); mobidb-lite (MOBIDB_LITE); mobidb-lite (MOBIDB_LITE); mobidb-lite (MOBIDB_LITE); IPR039024 (PANTHER)	no GO terms	no GO terms
genemark-Pseudochromosome_1-processed-gene-22.0	60S ribosomal protein L36	105	1.41726E-66	F:GO:0003735; C:GO:0005840; P:GO:0006412	F:structural constituent of ribosome; C:ribosome; P:translation			Coil (COILS); IPR038097 (G3DSA:1.10.10.GENE3D); IPR000509 (PFAM); mobidb-lite (MOBIDB_LITE); mobidb-lite (MOBIDB_LITE); PTHR10114:SF0 (PANTHER); IPR000509 (PANTHER)	F:GO:0003735; C:GO:0005622; C:GO:0005840; P:GO:0006412	F:structural constituent of ribosome; C:intracellular; C:ribosome; P:translation
genemark-Pseudochromosome_1-processed-gene-24.68	pci protein	210	1.40548E-97					mobidb-lite (MOBIDB_LITE); mobidb-lite (MOBIDB_LITE); mobidb-lite (MOBIDB_LITE); mobidb-lite (MOBIDB_LITE); mobidb-lite (MOBIDB_LITE); PTHR38118 (PANTHER); SIGNAL_PEPTIDE (PHOBIUS); SIGNAL_PEPTIDE_C_REGION (PHOBIUS); SIGNAL_PEPTIDE_N_REGION (PHOBIUS); SIGNAL_PEPTIDE_H_REGION (PHOBIUS); NON_CYTOPLASMIC_DOMAIN (PHOBIUS); SignalP-noTM (SIGNALP_EUK); SignalP-TM (SIGNALP_GRAM_POSITIVE); SignalP-noTM (…	no GO terms	no GO terms
maker-Pseudochromosome_1-augustus-gene-16.102	hypothetical protein FVEG_09477	270	2.71885E-165	F:GO:0003674	F:molecular_function			IPR001810 (PFAM); G3DSA:1.20.1280.50 (GENE3D); IPR001810 (PROSITE_PROFILES); IPR036047 (SUPERFAMILY)	F:GO:0005515	F:protein binding
snap_masked-Pseudochromosome_1-processed-gene-23.72	probable TIM54 (component of the mitochondrial TIM22 translocase)	458	0.0					IPR021056 (PFAM); mobidb-lite (MOBIDB_LITE); mobidb-lite (MOBIDB_LITE); mobidb-lite (MOBIDB_LITE); mobidb-lite (MOBIDB_LITE); mobidb-lite (MOBIDB_LITE); mobidb-lite (MOBIDB_LITE); PTHR12358:SF6 (PANTHER); PTHR12358 (PANTHER); TRANSMEMBRANE (PHOBIUS); NON_CYTOPLASMIC_DOMAIN (PHOBIUS); CYTOPLASMIC_DOMAIN (PHOBIUS)	no GO terms	no GO terms
genemark-Pseudochromosome_1-processed-gene-27.36	dimeric alpha-beta barrel	214	1.6536E-149					G3DSA:3.30.70.100 (GENE3D); IPR007138 (PROSITE_PROFILES); IPR011008 (SUPERFAMILY)	no GO terms	no GO terms
augustus_masked-Pseudochromosome_1-processed-gene-26.50	hypothetical protein FOMG_00963	838	0.0	F:GO:0003674	F:molecular_function			Coil (COILS); IPR002885 (PFAM); IPR011990 (G3DSA:1.25.40.GENE3D); IPR011990 (G3DSA:1.25.40.GENE3D); PTHR44149 (PANTHER); SIGNAL_PEPTIDE (PHOBIUS); NON_CYTOPLASMIC_DOMAIN (PHOBIUS); SIGNAL_PEPTIDE_N_REGION (PHOBIUS); SIGNAL_PEPTIDE_C_REGION (PHOBIUS); SIGNAL_PEPTIDE_H_REGION (PHOBIUS); IPR002885 (PROSITE_PROFILES); IPR002885 (PROSITE_PROFILES); IPR002885 (PROSITE_PROFILES); SignalP-noTM (SIGNALP_E…	F:GO:0005515	F:protein binding
genemark-Pseudochromosome_1-processed-gene-31.107	related to aminotriazole resistance protein	583	0.0	C:GO:0005575; P:GO:0055085	C:cellular_component; P:transmembrane transport			G3DSA:1.20.1720.10 (GENE3D); G3DSA:1.20.1250.20 (GENE3D); IPR011701 (PFAM); mobidb-lite (MOBIDB_LITE); mobidb-lite (MOBIDB_LITE); PTHR42718:SF18 (PANTHER); PTHR42718 (PANTHER); TRANSMEMBRANE (PHOBIUS); NON_CYTOPLASMIC_DOMAIN (PHOBIUS); CYTOPLASMIC_DOMAIN (PHOBIUS); CYTOPLASMIC_DOMAIN (PHOBIUS); NON_CYTOPLASMIC_DOMAIN (PHOBIUS); NON_CYTOPLASMIC_DOMAIN (PHOBIUS); NON_CYTOPLASMIC_DOMAIN (PHOBIUS); T…	C:GO:0016021; P:GO:0055085	C:integral component of membrane; P:transmembrane transport
genemark-Pseudochromosome_1-processed-gene-22.23	related to acetylxylan esterase	305	0.0	C:GO:0005575	C:cellular_component			IPR013830 (PFAM); IPR036514 (G3DSA:3.40.50.GENE3D); PTHR30383 (PANTHER); PTHR30383:SF4 (PANTHER); SIGNAL_PEPTIDE_H_REGION (PHOBIUS); SIGNAL_PEPTIDE (PHOBIUS); NON_CYTOPLASMIC_DOMAIN (PHOBIUS); SIGNAL_PEPTIDE_N_REGION (PHOBIUS); SIGNAL_PEPTIDE_C_REGION (PHOBIUS); cd01833 (CDD); SignalP-noTM (SIGNALP_EUK); SSF52266 (SUPERFAMILY)	no GO terms	no GO terms
genemark-Pseudochromosome_1-processed-gene-31.104	related to alpha-methylacyl-coa racemase	453	0.0	F:GO:0003674	F:molecular_function			G3DSA:3.30.1540.10 (GENE3D); IPR023606 (G3DSA:3.40.50.GENE3D); IPR003673 (PFAM); IPR003673 (PANTHER); PTHR43949:SF6 (PANTHER); IPR023606 (SUPERFAMILY)	F:GO:0003824	F:catalytic activity
genemark-Pseudochromosome_1-processed-gene-27.33	uncharacterized protein FFB14_03477	270	6.62448E-180					IPR002818 (PFAM); IPR029062 (G3DSA:3.40.50.GENE3D); PTHR43130 (PANTHER); IPR029062 (SUPERFAMILY)	no GO terms	no GO terms
genemark-Pseudochromosome_1-processed-gene-16.95	probable AVT3-involved in amino acid efflux from the vacuole	192	2.55135E-125	C:GO:0005575	C:cellular_component			mobidb-lite (MOBIDB_LITE); mobidb-lite (MOBIDB_LITE); mobidb-lite (MOBIDB_LITE); mobidb-lite (MOBIDB_LITE)	no GO terms	no GO terms
genemark-Pseudochromosome_1-processed-gene-16.92	related to DUF218 domain protein	321	0.0	C:GO:0005575	C:cellular_component			IPR003848 (PFAM); IPR014729 (G3DSA:3.40.50.GENE3D); G3DSA:1.10.3620.10 (GENE3D); PTHR30336:SF8 (PANTHER); PTHR30336 (PANTHER); TMhelix (TMHMM)	no GO terms	no GO terms
genemark-Pseudochromosome_1-processed-gene-20.33	related to protein kinase CDC5	1005	0.0	P:GO:0006464; F:GO:0016301; F:GO:0043167	P:cellular protein modification process; F:kinase activity; F:ion binding			IPR000719 (SMART); IPR000719 (PFAM); IPR036947 (G3DSA:3.30.1120.GENE3D); G3DSA:1.10.510.10 (GENE3D); mobidb-lite (MOBIDB_LITE); mobidb-lite (MOBIDB_LITE); mobidb-lite (MOBIDB_LITE); mobidb-lite (MOBIDB_LITE); mobidb-lite (MOBIDB_LITE); PTHR24345 (PANTHER); PTHR24345:SF74 (PANTHER); IPR000719 (PROSITE_PROFILES); IPR033701 (CDD); cd14099 (CDD); IPR011009 (SUPERFAMILY); SSF82615 (SUPERFAMILY); SSF82…	F:GO:0004672; F:GO:0005515; F:GO:0005524; P:GO:0006468	F:protein kinase activity; F:protein binding; F:ATP binding; P:protein phosphorylation
genemark-Pseudochromosome_1-processed-gene-20.30	probable Vacuolar ATPase assembly integral membrane protein VMA21	104	6.77459E-69	C:GO:0005783; C:GO:0031410; P:GO:0065003	C:endoplasmic reticulum; C:cytoplasmic vesicle; P:protein-containing complex assembly			IPR019013 (PFAM); IPR019013 (PANTHER); CYTOPLASMIC_DOMAIN (PHOBIUS); NON_CYTOPLASMIC_DOMAIN (PHOBIUS); TRANSMEMBRANE (PHOBIUS); CYTOPLASMIC_DOMAIN (PHOBIUS); TRANSMEMBRANE (PHOBIUS); IPR019013 (HAMAP); TMhelix (TMHMM); TMhelix (TMHMM)	P:GO:0070072	P:vacuolar proton-transporting V-type ATPase complex assembly
maker-Pseudochromosome_1-snap-gene-28.72	hypothetical protein FVEG_14787	88	1.83918E-40					no IPS match	no IPS match	no IPS match
genemark-Pseudochromosome_1-processed-gene-25.84	delta-1-pyrroline-5-carboxylate dehydrogenase, mitochondrial	576	0.0	P:GO:0006520; P:GO:0009056; F:GO:0016491	P:cellular amino acid metabolic process; P:catabolic process; F:oxidoreductase activity	EC:1.5.1.12	Acting on the CH-NH group of donors	IPR016162 (G3DSA:3.40.605.GENE3D); IPR005931 (TIGRFAM); IPR015590 (PFAM); IPR016163 (G3DSA:3.40.309.GENE3D); PTHR42862 (PANTHER); IPR005931 (CDD); IPR016161 (SUPERFAMILY)	F:GO:0003842; P:GO:0010133; F:GO:0016491; F:GO:0016620; P:GO:0055114	F:1-pyrroline-5-carboxylate dehydrogenase activity; P:proline catabolic process to glutamate; F:oxidoreductase activity; F:oxidoreductase activity, acting on the aldehyde or oxo group of donors, NAD or NADP as acceptor; P:oxidation-reduction process
genemark-Pseudochromosome_1-processed-gene-31.97	mediator of rna polymerase ii transcription subunit 16	943	0.0	C:GO:0005654; C:GO:0032991	C:nucleoplasm; C:protein-containing complex			IPR021665 (PFAM); IPR021665 (PANTHER)	C:GO:0016592	C:mediator complex
genemark-Pseudochromosome_1-processed-gene-25.95	nbl1 borealin protein	359	0.0					IPR018851 (PFAM); mobidb-lite (MOBIDB_LITE); mobidb-lite (MOBIDB_LITE); mobidb-lite (MOBIDB_LITE); mobidb-lite (MOBIDB_LITE); mobidb-lite (MOBIDB_LITE); mobidb-lite (MOBIDB_LITE); mobidb-lite (MOBIDB_LITE); PTHR16040:SF7 (PANTHER); PTHR16040 (PANTHER)	no GO terms	no GO terms
genemark-Pseudochromosome_1-processed-gene-19.11	related to ABP1-actin-binding protein	826	0.0	C:GO:0005622; F:GO:0008092	C:intracellular; F:cytoskeletal protein binding			PR00499 (PRINTS); IPR001452 (PRINTS); IPR002108 (SMART); IPR001452 (SMART); IPR001452 (PFAM); G3DSA:2.30.30.40 (GENE3D); IPR029006 (G3DSA:3.40.20.GENE3D); IPR001452 (PFAM); G3DSA:2.30.30.40 (GENE3D); IPR002108 (PFAM); mobidb-lite (MOBIDB_LITE); mobidb-lite (MOBIDB_LITE); mobidb-lite (MOBIDB_LITE); mobidb-lite (MOBIDB_LITE); mobidb-lite (MOBIDB_LITE); mobidb-lite (MOBIDB_LITE); mobidb-lite (MOBIDB…	F:GO:0003779; F:GO:0005515; C:GO:0005622	F:actin binding; F:protein binding; C:intracellular
genemark-Pseudochromosome_1-processed-gene-19.30	acetate kinase	399	0.0	P:GO:0006790; P:GO:0009058; F:GO:0016301; P:GO:0034641; F:GO:0043167; P:GO:0044281; P:GO:0051186	P:sulfur compound metabolic process; P:biosynthetic process; F:kinase activity; P:cellular nitrogen compound metabolic process; F:ion binding; P:small molecule metabolic process; P:cofactor metabolic process	EC:2.7.2.1	Acetate kinase	mobidb-lite (MOBIDB_LITE); mobidb-lite (MOBIDB_LITE); mobidb-lite (MOBIDB_LITE); mobidb-lite (MOBIDB_LITE)	no GO terms	no GO terms
snap_masked-Pseudochromosome_1-processed-gene-30.30	hypothetical protein FOXG_00402	305	0.0					mobidb-lite (MOBIDB_LITE); mobidb-lite (MOBIDB_LITE); mobidb-lite (MOBIDB_LITE); mobidb-lite (MOBIDB_LITE)	no GO terms	no GO terms
maker-Pseudochromosome_1-snap-gene-30.12	bifunctional purine biosynthesis protein ADE17	632	0.0	P:GO:0009058; F:GO:0016810; P:GO:0034641; P:GO:0044281	P:biosynthetic process; F:hydrolase activity, acting on carbon-nitrogen (but not peptide) bonds; P:cellular nitrogen compound metabolic process; P:small molecule metabolic process	EC:3.5.4.10; EC:2.1.2.3	IMP cyclohydrolase; Phosphoribosylaminoimidazolecarboxamide formyltransferase	IPR011607 (SMART); IPR002695 (SMART); IPR024051 (G3DSA:3.40.140.GENE3D); IPR002695 (PFAM); IPR024050 (G3DSA:1.10.287.GENE3D); IPR011607 (PFAM); IPR002695 (TIGRFAM); IPR024051 (G3DSA:3.40.140.GENE3D); IPR036914 (G3DSA:3.40.50.GENE3D); IPR002695 (PANTHER); IPR002695 (HAMAP); cd01421 (CDD); IPR036914 (SUPERFAMILY); IPR016193 (SUPERFAMILY)	F:GO:0003824; F:GO:0003937; F:GO:0004643; P:GO:0006164	F:catalytic activity; F:IMP cyclohydrolase activity; F:phosphoribosylaminoimidazolecarboxamide formyltransferase activity; P:purine nucleotide biosynthetic process
genemark-Pseudochromosome_1-processed-gene-31.78	related to peroxisomal membrane protein 4	227	5.09801E-167	C:GO:0005634; C:GO:0005737; C:GO:0032991	C:nucleus; C:cytoplasm; C:protein-containing complex			IPR019531 (PIRSF); PF02466 (PFAM); IPR019531 (PANTHER); CYTOPLASMIC_DOMAIN (PHOBIUS); TRANSMEMBRANE (PHOBIUS); CYTOPLASMIC_DOMAIN (PHOBIUS); NON_CYTOPLASMIC_DOMAIN (PHOBIUS); CYTOPLASMIC_DOMAIN (PHOBIUS); NON_CYTOPLASMIC_DOMAIN (PHOBIUS); TRANSMEMBRANE (PHOBIUS); TRANSMEMBRANE (PHOBIUS); TRANSMEMBRANE (PHOBIUS)	no GO terms	no GO terms
genemark-Pseudochromosome_1-processed-gene-16.70	hypothetical protein FVEG_16600	351	0.0	F:GO:0003674	F:molecular_function			IPR001214 (SMART); G3DSA:2.170.270.10 (GENE3D); IPR001214 (PFAM); mobidb-lite (MOBIDB_LITE); mobidb-lite (MOBIDB_LITE); mobidb-lite (MOBIDB_LITE); PTHR12197 (PANTHER); IPR001214 (PROSITE_PROFILES); SSF82199 (SUPERFAMILY)	F:GO:0005515	F:protein binding
genemark-Pseudochromosome_1-processed-gene-16.76	related to GTP-binding protein	620	0.0	C:GO:0005730; F:GO:0043167	C:nucleolus; F:ion binding			Coil (COILS); IPR006073 (PRINTS); G3DSA:3.40.50.300 (GENE3D); IPR023179 (G3DSA:1.10.1580.GENE3D); IPR006073 (PFAM); IPR012971 (PFAM); mobidb-lite (MOBIDB_LITE); mobidb-lite (MOBIDB_LITE); mobidb-lite (MOBIDB_LITE); mobidb-lite (MOBIDB_LITE); mobidb-lite (MOBIDB_LITE); IPR024929 (PTHR11089:PANTHER); PTHR11089 (PANTHER); IPR030378 (PROSITE_PROFILES); cd01858 (CDD); IPR027417 (SUPERFAMILY)	F:GO:0005525; C:GO:0005730	F:GTP binding; C:nucleolus
snap_masked-Pseudochromosome_1-processed-gene-23.45	hypothetical protein FNYG_11707	168	6.8003E-101					mobidb-lite (MOBIDB_LITE); mobidb-lite (MOBIDB_LITE); mobidb-lite (MOBIDB_LITE); mobidb-lite (MOBIDB_LITE); mobidb-lite (MOBIDB_LITE); mobidb-lite (MOBIDB_LITE)	no GO terms	no GO terms
genemark-Pseudochromosome_1-processed-gene-22.3	uncharacterized protein FFUJ_01433	171	4.58404E-120					mobidb-lite (MOBIDB_LITE); mobidb-lite (MOBIDB_LITE); SIGNAL_PEPTIDE (PHOBIUS); SIGNAL_PEPTIDE_N_REGION (PHOBIUS); SIGNAL_PEPTIDE_C_REGION (PHOBIUS); SIGNAL_PEPTIDE_H_REGION (PHOBIUS); NON_CYTOPLASMIC_DOMAIN (PHOBIUS); SignalP-noTM (SIGNALP_EUK)	no GO terms	no GO terms
maker-Pseudochromosome_1-snap-gene-28.67	hypothetical protein FOPG_05733	472	0.0	F:GO:0003700; C:GO:0005634; P:GO:0009058; P:GO:0034641; F:GO:0043167	F:DNA-binding transcription factor activity; C:nucleus; P:biosynthetic process; P:cellular nitrogen compound metabolic process; F:ion binding			IPR001138 (SMART); IPR001138 (PFAM); IPR036864 (G3DSA:4.10.240.GENE3D); mobidb-lite (MOBIDB_LITE); PTHR31313:SF25 (PANTHER); PTHR31313 (PANTHER); IPR001138 (PROSITE_PROFILES); IPR001138 (CDD); IPR036864 (SUPERFAMILY)	F:GO:0000981; C:GO:0005634; P:GO:0006355; F:GO:0008270	F:DNA-binding transcription factor activity, RNA polymerase II-specific; C:nucleus; P:regulation of transcription, DNA-templated; F:zinc ion binding
maker-Pseudochromosome_1-snap-gene-30.6	related to integral membrane protein	371	0.0	C:GO:0005575	C:cellular_component			PTHR33048 (PANTHER); TRANSMEMBRANE (PHOBIUS); TRANSMEMBRANE (PHOBIUS); TRANSMEMBRANE (PHOBIUS); CYTOPLASMIC_DOMAIN (PHOBIUS); CYTOPLASMIC_DOMAIN (PHOBIUS); NON_CYTOPLASMIC_DOMAIN (PHOBIUS); TRANSMEMBRANE (PHOBIUS); NON_CYTOPLASMIC_DOMAIN (PHOBIUS); NON_CYTOPLASMIC_DOMAIN (PHOBIUS); TMhelix (TMHMM); TMhelix (TMHMM); TMhelix (TMHMM); TMhelix (TMHMM); TMhelix (TMHMM)	no GO terms	no GO terms
genemark-Pseudochromosome_1-processed-gene-30.100	uncharacterized protein FPRO_00972	686	0.0					Coil (COILS); mobidb-lite (MOBIDB_LITE); mobidb-lite (MOBIDB_LITE); mobidb-lite (MOBIDB_LITE); mobidb-lite (MOBIDB_LITE); mobidb-lite (MOBIDB_LITE); mobidb-lite (MOBIDB_LITE); mobidb-lite (MOBIDB_LITE); mobidb-lite (MOBIDB_LITE); mobidb-lite (MOBIDB_LITE); PTHR42023 (PANTHER)	no GO terms	no GO terms
genemark-Pseudochromosome_1-processed-gene-31.83	hypothetical protein FOMG_01130	697	0.0					G3DSA:3.10.450.50 (GENE3D); mobidb-lite (MOBIDB_LITE); mobidb-lite (MOBIDB_LITE); mobidb-lite (MOBIDB_LITE); mobidb-lite (MOBIDB_LITE); mobidb-lite (MOBIDB_LITE); mobidb-lite (MOBIDB_LITE); mobidb-lite (MOBIDB_LITE); mobidb-lite (MOBIDB_LITE); mobidb-lite (MOBIDB_LITE); mobidb-lite (MOBIDB_LITE); mobidb-lite (MOBIDB_LITE); mobidb-lite (MOBIDB_LITE); mobidb-lite (MOBIDB_LITE); mobidb-lite (MOBIDB_…	no GO terms	no GO terms
snap_masked-Pseudochromosome_1-processed-gene-20.39	-No description-	135						no IPS match	no IPS match	no IPS match
snap_masked-Pseudochromosome_1-processed-gene-18.66	adenylyl-sulfate kinase	207	4.76613E-152	P:GO:0006520; P:GO:0006790; P:GO:0009058; F:GO:0016301; P:GO:0019748; F:GO:0043167	P:cellular amino acid metabolic process; P:sulfur compound metabolic process; P:biosynthetic process; F:kinase activity; P:secondary metabolic process; F:ion binding	EC:2.7.1.25	Adenylyl-sulfate kinase	G3DSA:3.40.50.300 (GENE3D); IPR002891 (TIGRFAM); PF01583 (PFAM); PTHR11055 (PANTHER); PTHR11055:SF1 (PANTHER); IPR002891 (HAMAP); IPR002891 (CDD); IPR027417 (SUPERFAMILY)	P:GO:0000103; F:GO:0004020; F:GO:0005524	P:sulfate assimilation; F:adenylylsulfate kinase activity; F:ATP binding
genemark-Pseudochromosome_1-processed-gene-16.87	hypothetical protein FNYG_07627	718	0.0					mobidb-lite (MOBIDB_LITE); mobidb-lite (MOBIDB_LITE); mobidb-lite (MOBIDB_LITE); mobidb-lite (MOBIDB_LITE); mobidb-lite (MOBIDB_LITE); mobidb-lite (MOBIDB_LITE); mobidb-lite (MOBIDB_LITE); mobidb-lite (MOBIDB_LITE); mobidb-lite (MOBIDB_LITE); mobidb-lite (MOBIDB_LITE); mobidb-lite (MOBIDB_LITE); mobidb-lite (MOBIDB_LITE); mobidb-lite (MOBIDB_LITE)	no GO terms	no GO terms
snap_masked-Pseudochromosome_1-processed-gene-23.50	hypothetical protein FOC1_g10015472	451	0.0					mobidb-lite (MOBIDB_LITE); mobidb-lite (MOBIDB_LITE); mobidb-lite (MOBIDB_LITE); mobidb-lite (MOBIDB_LITE)	no GO terms	no GO terms
genemark-Pseudochromosome_1-processed-gene-29.114	related to F1F0 ATPase complex assembly protein	345	0.0					IPR007849 (PFAM); mobidb-lite (MOBIDB_LITE); mobidb-lite (MOBIDB_LITE); mobidb-lite (MOBIDB_LITE); IPR007849 (PANTHER)	no GO terms	no GO terms
genemark-Pseudochromosome_1-processed-gene-29.103	elongation factor 1-beta	230	1.2338E-163	C:GO:0000228; C:GO:0005654; C:GO:0005737; P:GO:0006259; F:GO:0008135; C:GO:0032991	C:nuclear chromosome; C:nucleoplasm; C:cytoplasm; P:DNA metabolic process; F:translation factor activity, RNA binding; C:protein-containing complex			Coil (COILS); IPR014038 (SMART); IPR018940 (SMART); IPR004046 (PFAM); IPR014038 (PFAM); G3DSA:1.20.1050.130 (GENE3D); IPR014717 (G3DSA:3.30.70.GENE3D); IPR018940 (PFAM); PTHR11595 (PANTHER); PTHR11595:SF21 (PANTHER); IPR014038 (CDD); cd10308 (CDD); IPR036282 (SUPERFAMILY); IPR036219 (SUPERFAMILY)	F:GO:0003746; P:GO:0006414	F:translation elongation factor activity; P:translational elongation
genemark-Pseudochromosome_1-processed-gene-18.11	pre-mRNA-splicing factor prp46	459	0.0	F:GO:0003674	F:molecular_function			IPR020472 (PRINTS); IPR001680 (SMART); IPR001680 (PFAM); IPR015943 (G3DSA:2.130.10.GENE3D); mobidb-lite (MOBIDB_LITE); mobidb-lite (MOBIDB_LITE); PTHR19923 (PANTHER); IPR001680 (PROSITE_PROFILES); IPR001680 (PROSITE_PROFILES); IPR017986 (PROSITE_PROFILES); IPR001680 (PROSITE_PROFILES); IPR001680 (PROSITE_PROFILES); IPR001680 (PROSITE_PROFILES); cd00200 (CDD); IPR036322 (SUPERFAMILY)	F:GO:0005515	F:protein binding
genemark-Pseudochromosome_1-processed-gene-18.22	Origin recognition complex subunit 1	703	0.0	F:GO:0003677; C:GO:0005634; P:GO:0006259; P:GO:0009058; F:GO:0043167; P:GO:0051301	F:DNA binding; C:nucleus; P:DNA metabolic process; P:biosynthetic process; F:ion binding; P:cell division			IPR003593 (SMART); IPR001025 (PFAM); PF17872 (PFAM); G3DSA:1.10.8.1280 (GENE3D); G3DSA:3.40.50.300 (GENE3D); G3DSA:2.30.30.490 (GENE3D); IPR003959 (PFAM); IPR016314 (PIRSF); mobidb-lite (MOBIDB_LITE); mobidb-lite (MOBIDB_LITE); mobidb-lite (MOBIDB_LITE); mobidb-lite (MOBIDB_LITE); mobidb-lite (MOBIDB_LITE); mobidb-lite (MOBIDB_LITE); PTHR10763 (PANTHER); IPR020793 (PTHR10763:PANTHER); IPR001025 (…	F:GO:0003682; F:GO:0005524; P:GO:0006270; P:GO:0051301	F:chromatin binding; F:ATP binding; P:DNA replication initiation; P:cell division
genemark-Pseudochromosome_1-processed-gene-22.29	nuclear protein localization protein 4	646	0.0	P:GO:0009056	P:catabolic process			G3DSA:3.10.20.90 (GENE3D); IPR016563 (PIRSF); IPR007717 (PFAM); IPR007716 (PFAM); G3DSA:3.40.140.10 (GENE3D); mobidb-lite (MOBIDB_LITE); mobidb-lite (MOBIDB_LITE); PTHR12710 (PANTHER); IPR037518 (PROSITE_PROFILES); IPR007717 (CDD); IPR029071 (SUPERFAMILY)	P:GO:0006511	P:ubiquitin-dependent protein catabolic process
maker-Pseudochromosome_1-snap-gene-25.119	uncharacterized protein FPRO_00805	882	0.0	F:GO:0003674; C:GO:0005575	F:molecular_function; C:cellular_component			IPR015915 (G3DSA:2.120.10.GENE3D); PF13854 (PFAM); mobidb-lite (MOBIDB_LITE); mobidb-lite (MOBIDB_LITE); mobidb-lite (MOBIDB_LITE); PTHR23244:SF330 (PANTHER); PTHR23244:SF330 (PANTHER); PTHR23244 (PANTHER); PTHR23244 (PANTHER); NON_CYTOPLASMIC_DOMAIN (PHOBIUS); TRANSMEMBRANE (PHOBIUS); CYTOPLASMIC_DOMAIN (PHOBIUS); IPR015915 (SUPERFAMILY); TMhelix (TMHMM)	F:GO:0005515	F:protein binding
genemark-Pseudochromosome_1-processed-gene-26.81	6-phosphogluconate dehydrogenase, decarboxylating 1	490	0.0	P:GO:0005975; F:GO:0016491; P:GO:0034641; P:GO:0044281; P:GO:0051186	P:carbohydrate metabolic process; F:oxidoreductase activity; P:cellular nitrogen compound metabolic process; P:small molecule metabolic process; P:cofactor metabolic process	EC:1.1.1.44	Phosphogluconate dehydrogenase (NADP(+)-dependent, decarboxylating)	IPR006183 (PRINTS); IPR006183 (PRINTS); IPR006183 (PRINTS); IPR006183 (PRINTS); IPR006183 (PRINTS); IPR006183 (PRINTS); IPR006114 (SMART); G3DSA:1.20.5.320 (GENE3D); IPR006113 (PIRSF); G3DSA:3.40.50.720 (GENE3D); IPR013328 (G3DSA:1.10.1040.GENE3D); IPR006113 (TIGRFAM); IPR006114 (PFAM); IPR006115 (PFAM); PTHR11811:SF25 (PANTHER); IPR006183 (PANTHER); IPR036291 (SUPERFAMILY); IPR008927 (SUPERFAMIL…	F:GO:0004616; P:GO:0006098; F:GO:0016491; F:GO:0050661; P:GO:0055114	F:phosphogluconate dehydrogenase (decarboxylating) activity; P:pentose-phosphate shunt; F:oxidoreductase activity; F:NADP binding; P:oxidation-reduction process
maker-Pseudochromosome_1-augustus-gene-28.66	uncharacterized protein FMAN_00886	547	0.0	C:GO:0005634; P:GO:0007059; P:GO:0051276; P:GO:0140014	C:nucleus; P:chromosome segregation; P:chromosome organization; P:mitotic nuclear division			Coil (COILS); Coil (COILS); Coil (COILS); IPR012916 (PFAM); mobidb-lite (MOBIDB_LITE); mobidb-lite (MOBIDB_LITE); mobidb-lite (MOBIDB_LITE); mobidb-lite (MOBIDB_LITE); mobidb-lite (MOBIDB_LITE); mobidb-lite (MOBIDB_LITE); mobidb-lite (MOBIDB_LITE); mobidb-lite (MOBIDB_LITE); mobidb-lite (MOBIDB_LITE); mobidb-lite (MOBIDB_LITE); mobidb-lite (MOBIDB_LITE); IPR039896 (PANTHER)	C:GO:0005634; P:GO:0007094	C:nucleus; P:mitotic spindle assembly checkpoint
maker-Pseudochromosome_1-snap-gene-25.113	uncharacterized protein FMAN_00780	348	0.0	F:GO:0003674	F:molecular_function			G3DSA:3.30.710.10 (GENE3D); IPR000210 (PROSITE_PROFILES)	F:GO:0005515	F:protein binding
augustus_masked-Pseudochromosome_1-processed-gene-29.36	centromeric protein E	956	0.0	C:GO:0005856; F:GO:0008092; P:GO:0008150; F:GO:0043167	C:cytoskeleton; F:cytoskeletal protein binding; P:biological_process; F:ion binding	EC:3.6.1.15	Nucleoside-triphosphate phosphatase	Coil (COILS); Coil (COILS); Coil (COILS); IPR001752 (PRINTS); IPR001752 (SMART); IPR001752 (PFAM); IPR036961 (G3DSA:3.40.850.GENE3D); mobidb-lite (MOBIDB_LITE); mobidb-lite (MOBIDB_LITE); mobidb-lite (MOBIDB_LITE); mobidb-lite (MOBIDB_LITE); mobidb-lite (MOBIDB_LITE); mobidb-lite (MOBIDB_LITE); mobidb-lite (MOBIDB_LITE); mobidb-lite (MOBIDB_LITE); mobidb-lite (MOBIDB_LITE); mobidb-lite (MOBIDB_LI…	F:GO:0003777; F:GO:0005524; P:GO:0007018; F:GO:0008017	F:microtubule motor activity; F:ATP binding; P:microtubule-based movement; F:microtubule binding
genemark-Pseudochromosome_1-processed-gene-18.17	related to ubiquitin-like protein modifier	98	1.34983E-65	C:GO:0000228; F:GO:0003674; C:GO:0005737; C:GO:0005815; P:GO:0006259; P:GO:0006464; P:GO:0009058; P:GO:0042592; P:GO:0051276	C:nuclear chromosome; F:molecular_function; C:cytoplasm; C:microtubule organizing center; P:DNA metabolic process; P:cellular protein modification process; P:biosynthetic process; P:homeostatic process; P:chromosome organization			IPR000626 (SMART); IPR022617 (PFAM); G3DSA:3.10.20.90 (GENE3D); mobidb-lite (MOBIDB_LITE); mobidb-lite (MOBIDB_LITE); PTHR10562 (PANTHER); PTHR10562:SF30 (PANTHER); IPR000626 (PROSITE_PROFILES); IPR033950 (CDD); IPR029071 (SUPERFAMILY)	F:GO:0005515; P:GO:0016925	F:protein binding; P:protein sumoylation
genemark-Pseudochromosome_1-processed-gene-23.7	related to ubiquitin--protein ligase	2170	0.0	P:GO:0006464; P:GO:0009056; F:GO:0016874; F:GO:0043167	P:cellular protein modification process; P:catabolic process; F:ligase activity; F:ion binding			Coil (COILS); IPR003126 (SMART); IPR001841 (SMART); IPR003769 (PFAM); G3DSA:2.10.110.30 (GENE3D); IPR003126 (PFAM); mobidb-lite (MOBIDB_LITE); mobidb-lite (MOBIDB_LITE); mobidb-lite (MOBIDB_LITE); mobidb-lite (MOBIDB_LITE); mobidb-lite (MOBIDB_LITE); mobidb-lite (MOBIDB_LITE); IPR039164 (PANTHER); PTHR21497:SF24 (PANTHER); IPR003126 (PROSITE_PROFILES); cd16482 (CDD); IPR036390 (SUPERFAMILY)	F:GO:0008270; P:GO:0030163; F:GO:0061630; P:GO:0071596	F:zinc ion binding; P:protein catabolic process; F:ubiquitin protein ligase activity; P:ubiquitin-dependent protein catabolic process via the N-end rule pathway
snap_masked-Pseudochromosome_1-processed-gene-31.37	probable ASP3-1-L-asparaginase II	437	0.0	P:GO:0006520; F:GO:0016810; P:GO:0034641	P:cellular amino acid metabolic process; F:hydrolase activity, acting on carbon-nitrogen (but not peptide) bonds; P:cellular nitrogen compound metabolic process	EC:3.5.1.1	Asparaginase	IPR006034 (PRINTS); IPR006034 (SMART); IPR027474 (PFAM); PIRSF500176 (PIRSF); IPR037152 (G3DSA:3.40.50.GENE3D); IPR006034 (PIRSF); IPR004550 (TIGRFAM); IPR027473 (G3DSA:3.40.50.GENE3D); PF17763 (PFAM),SFLDS00057 (SFLD); PTHR43828:SF2 (PANTHER); PTHR43828 (PANTHER); NON_CYTOPLASMIC_DOMAIN (PHOBIUS); SIGNAL_PEPTIDE_N_REGION (PHOBIUS); SIGNAL_PEPTIDE_H_REGION (PHOBIUS); TRANSMEMBRANE (PHOBIUS); SIGN…	F:GO:0004067; P:GO:0006528	F:asparaginase activity; P:asparagine metabolic process
genemark-Pseudochromosome_1-processed-gene-26.70	related to glycosyl hydrolase, family 15	675	0.0	F:GO:0003674	F:molecular_function			IPR012341 (G3DSA:1.50.10.GENE3D); IPR011613 (PFAM); PTHR31616:SF0 (PANTHER); PTHR31616 (PANTHER); IPR008928 (SUPERFAMILY)	F:GO:0003824	F:catalytic activity
genemark-Pseudochromosome_1-processed-gene-29.109	benzodiazapine receptor	185	6.79337E-128	C:GO:0005575; P:GO:0008150	C:cellular_component; P:biological_process			IPR004307 (PIRSF); IPR038330 (G3DSA:1.20.1260.GENE3D); IPR004307 (PFAM); PTHR10057:SF0 (PANTHER); IPR004307 (PANTHER); NON_CYTOPLASMIC_DOMAIN (PHOBIUS); CYTOPLASMIC_DOMAIN (PHOBIUS); NON_CYTOPLASMIC_DOMAIN (PHOBIUS); NON_CYTOPLASMIC_DOMAIN (PHOBIUS); TRANSMEMBRANE (PHOBIUS); TRANSMEMBRANE (PHOBIUS); CYTOPLASMIC_DOMAIN (PHOBIUS); TRANSMEMBRANE (PHOBIUS); TRANSMEMBRANE (PHOBIUS); TRANSMEMBRANE (PHO…	C:GO:0016021	C:integral component of membrane
maker-Pseudochromosome_1-snap-gene-31.13	probable ammonium transporter MEPa	544	0.0	C:GO:0005575; F:GO:0022857	C:cellular_component; F:transmembrane transporter activity			IPR002229 (PRINTS); IPR001905 (TIGRFAM); IPR024041 (PFAM); IPR029020 (G3DSA:1.10.3430.GENE3D); PTHR43029 (PANTHER); TRANSMEMBRANE (PHOBIUS); CYTOPLASMIC_DOMAIN (PHOBIUS); TRANSMEMBRANE (PHOBIUS); TRANSMEMBRANE (PHOBIUS); TRANSMEMBRANE (PHOBIUS); TRANSMEMBRANE (PHOBIUS); NON_CYTOPLASMIC_DOMAIN (PHOBIUS); TRANSMEMBRANE (PHOBIUS); NON_CYTOPLASMIC_DOMAIN (PHOBIUS); TRANSMEMBRANE (PHOBIUS); CYTOPLASMI…	F:GO:0008519; P:GO:0015696; C:GO:0016020; P:GO:0072488	F:ammonium transmembrane transporter activity; P:ammonium transport; C:membrane; P:ammonium transmembrane transport
snap_masked-Pseudochromosome_1-processed-gene-29.59	heat shock protein 78, mitochondrial	482	0.0	F:GO:0043167	F:ion binding			Coil (COILS); Coil (COILS); IPR001270 (PRINTS); IPR019489 (SMART); IPR003593 (SMART); G3DSA:1.10.8.60 (GENE3D); IPR003959 (PFAM); G3DSA:3.40.50.300 (GENE3D); IPR019489 (PFAM); G3DSA:3.40.50.300 (GENE3D); PTHR11638:SF18 (PANTHER); PTHR11638 (PANTHER); cd00009 (CDD); IPR027417 (SUPERFAMILY); IPR027417 (SUPERFAMILY)	F:GO:0005524	F:ATP binding
snap_masked-Pseudochromosome_1-processed-gene-19.66	hypothetical protein FPRO05_04788	78	4.96513E-45					no IPS match	no IPS match	no IPS match
snap_masked-Pseudochromosome_1-processed-gene-27.58	hypothetical protein FPRO05_12735	292	0.0	F:GO:0003700; C:GO:0005634; P:GO:0009058; P:GO:0034641; F:GO:0043167	F:DNA-binding transcription factor activity; C:nucleus; P:biosynthetic process; P:cellular nitrogen compound metabolic process; F:ion binding			mobidb-lite (MOBIDB_LITE); mobidb-lite (MOBIDB_LITE); mobidb-lite (MOBIDB_LITE); mobidb-lite (MOBIDB_LITE); mobidb-lite (MOBIDB_LITE); mobidb-lite (MOBIDB_LITE)	no GO terms	no GO terms
genemark-Pseudochromosome_1-processed-gene-18.7	related to calcineurin responsive zinc-finger protein	723	0.0	F:GO:0003674	F:molecular_function			IPR013087 (SMART); G3DSA:3.30.160.60 (GENE3D); IPR013087 (PFAM); G3DSA:3.30.160.60 (GENE3D); G3DSA:3.30.160.60 (GENE3D); mobidb-lite (MOBIDB_LITE); mobidb-lite (MOBIDB_LITE); mobidb-lite (MOBIDB_LITE); mobidb-lite (MOBIDB_LITE); mobidb-lite (MOBIDB_LITE); mobidb-lite (MOBIDB_LITE); mobidb-lite (MOBIDB_LITE); mobidb-lite (MOBIDB_LITE); mobidb-lite (MOBIDB_LITE); mobidb-lite (MOBIDB_LITE); mobidb-l…	F:GO:0003676	F:nucleic acid binding
snap_masked-Pseudochromosome_1-processed-gene-25.8	related to aminomethyltransferase precursor (glycine cleavage system protein T)	441	0.0	C:GO:0005739; P:GO:0006520; F:GO:0008168; P:GO:0009056; F:GO:0016491	C:mitochondrion; P:cellular amino acid metabolic process; F:methyltransferase activity; P:catabolic process; F:oxidoreductase activity	EC:2.1.2.10; EC:1.4.4.2	Aminomethyltransferase; Glycine dehydrogenase (aminomethyl-transferring)	IPR028896 (PIRSF); IPR006223 (TIGRFAM); IPR027266 (G3DSA:3.30.1360.GENE3D); IPR013977 (PFAM); G3DSA:3.30.70.1400 (GENE3D); IPR006222 (PFAM); G3DSA:4.10.1250.10 (GENE3D); G3DSA:2.40.30.110 (GENE3D); PTHR43757 (PANTHER); PTHR43757:SF2 (PANTHER); SIGNAL_PEPTIDE_H_REGION (PHOBIUS); NON_CYTOPLASMIC_DOMAIN (PHOBIUS); SIGNAL_PEPTIDE (PHOBIUS); SIGNAL_PEPTIDE_N_REGION (PHOBIUS); SIGNAL_PEPTIDE_C_REGION (…	F:GO:0004047; F:GO:0005515; P:GO:0006546	F:aminomethyltransferase activity; F:protein binding; P:glycine catabolic process
genemark-Pseudochromosome_1-processed-gene-18.3	BUB protein kinase	1216	0.0	P:GO:0006464; P:GO:0007059; F:GO:0016301; F:GO:0043167; P:GO:0051276; P:GO:0140014	P:cellular protein modification process; P:chromosome segregation; F:kinase activity; F:ion binding; P:chromosome organization; P:mitotic nuclear division	EC:2.7.11	Transferring phosphorus-containing groups	IPR000719 (SMART); IPR013212 (SMART); G3DSA:1.10.510.10 (GENE3D); IPR000719 (PFAM); IPR012572 (PFAM); IPR013212 (PFAM); G3DSA:1.25.40.430 (GENE3D); mobidb-lite (MOBIDB_LITE); mobidb-lite (MOBIDB_LITE); mobidb-lite (MOBIDB_LITE); mobidb-lite (MOBIDB_LITE); mobidb-lite (MOBIDB_LITE); mobidb-lite (MOBIDB_LITE); mobidb-lite (MOBIDB_LITE); mobidb-lite (MOBIDB_LITE); IPR015661 (PANTHER); PTHR14030:SF4 …	F:GO:0004672; F:GO:0005524; P:GO:0006468; P:GO:0007094	F:protein kinase activity; F:ATP binding; P:protein phosphorylation; P:mitotic spindle assembly checkpoint
maker-Pseudochromosome_1-snap-gene-20.5	protoporphyrinogen oxidase	595	0.0	P:GO:0009058; F:GO:0016491; P:GO:0034641; P:GO:0051186	P:biosynthetic process; F:oxidoreductase activity; P:cellular nitrogen compound metabolic process; P:cofactor metabolic process	EC:1.3.3.4	Protoporphyrinogen oxidase	IPR004572 (TIGRFAM); IPR002937 (PFAM); IPR036188 (G3DSA:3.50.50.GENE3D); PTHR42923:SF3 (PANTHER); PTHR42923 (PANTHER); NON_CYTOPLASMIC_DOMAIN (PHOBIUS); SIGNAL_PEPTIDE (PHOBIUS); SIGNAL_PEPTIDE_N_REGION (PHOBIUS); SIGNAL_PEPTIDE_C_REGION (PHOBIUS); SIGNAL_PEPTIDE_H_REGION (PHOBIUS); IPR036188 (SUPERFAMILY); SSF54373 (SUPERFAMILY); TMhelix (TMHMM)	F:GO:0004729; P:GO:0006779; F:GO:0016491; P:GO:0055114	F:oxygen-dependent protoporphyrinogen oxidase activity; P:porphyrin-containing compound biosynthetic process; F:oxidoreductase activity; P:oxidation-reduction process
genemark-Pseudochromosome_1-processed-gene-26.92	probable UTR1 protein, associated with ferric reductase activity	686	0.0	P:GO:0009058; F:GO:0016301; P:GO:0034641; P:GO:0044281; P:GO:0051186	P:biosynthetic process; F:kinase activity; P:cellular nitrogen compound metabolic process; P:small molecule metabolic process; P:cofactor metabolic process	EC:2.7.1.23	NAD(+) kinase	IPR017437 (G3DSA:2.60.200.GENE3D); IPR017438 (G3DSA:3.40.50.GENE3D); IPR002504 (PFAM); mobidb-lite (MOBIDB_LITE); mobidb-lite (MOBIDB_LITE); mobidb-lite (MOBIDB_LITE); mobidb-lite (MOBIDB_LITE); mobidb-lite (MOBIDB_LITE); mobidb-lite (MOBIDB_LITE); PTHR20275 (PANTHER); PTHR20275:SF0 (PANTHER); SIGNAL_PEPTIDE (PHOBIUS); SIGNAL_PEPTIDE_C_REGION (PHOBIUS); SIGNAL_PEPTIDE_H_REGION (PHOBIUS); SIGNAL_P…	F:GO:0003951; P:GO:0006741; P:GO:0019674	F:NAD+ kinase activity; P:NADP biosynthetic process; P:NAD metabolic process
genemark-Pseudochromosome_1-processed-gene-28.55	Rho guanine nucleotide exchange factor gef1	2000	0.0	C:GO:0005737; P:GO:0007165; F:GO:0019899	C:cytoplasm; P:signal transduction; F:enzyme binding			Coil (COILS); Coil (COILS); IPR000219 (SMART); IPR004148 (PFAM); IPR035899 (G3DSA:1.20.900.GENE3D); IPR027267 (G3DSA:1.20.1270.GENE3D); IPR000219 (PFAM); mobidb-lite (MOBIDB_LITE); mobidb-lite (MOBIDB_LITE); mobidb-lite (MOBIDB_LITE); mobidb-lite (MOBIDB_LITE); mobidb-lite (MOBIDB_LITE); mobidb-lite (MOBIDB_LITE); mobidb-lite (MOBIDB_LITE); mobidb-lite (MOBIDB_LITE); mobidb-lite (MOBIDB_LITE); mo…	F:GO:0005089; F:GO:0005515; C:GO:0005737; P:GO:0035023	F:Rho guanyl-nucleotide exchange factor activity; F:protein binding; C:cytoplasm; P:regulation of Rho protein signal transduction
genemark-Pseudochromosome_1-processed-gene-26.66	hypothetical protein FOMG_00948	634	0.0	C:GO:0005575	C:cellular_component			G3DSA:1.20.58.340 (GENE3D); PTHR21535 (PANTHER); PTHR21535:SF66 (PANTHER); CYTOPLASMIC_DOMAIN (PHOBIUS); NON_CYTOPLASMIC_DOMAIN (PHOBIUS); CYTOPLASMIC_DOMAIN (PHOBIUS); TRANSMEMBRANE (PHOBIUS); TRANSMEMBRANE (PHOBIUS); TMhelix (TMHMM)	no GO terms	no GO terms
genemark-Pseudochromosome_1-processed-gene-23.1	related to mitochondrial integral membrane protein	531	0.0	C:GO:0005575	C:cellular_component			IPR019431 (PFAM); IPR029058 (G3DSA:3.40.50.GENE3D); mobidb-lite (MOBIDB_LITE); mobidb-lite (MOBIDB_LITE); PTHR42886 (PANTHER); PTHR42886:SF19 (PANTHER); NON_CYTOPLASMIC_DOMAIN (PHOBIUS); NON_CYTOPLASMIC_DOMAIN (PHOBIUS); TRANSMEMBRANE (PHOBIUS); CYTOPLASMIC_DOMAIN (PHOBIUS); CYTOPLASMIC_DOMAIN (PHOBIUS); TRANSMEMBRANE (PHOBIUS); TRANSMEMBRANE (PHOBIUS); TRANSMEMBRANE (PHOBIUS); NON_CYTOPLASMIC_DO…	no GO terms	no GO terms
genemark-Pseudochromosome_1-processed-gene-29.111	uncharacterized protein FFUJ_01206	252	6.41221E-160	P:GO:0009058; P:GO:0034641	P:biosynthetic process; P:cellular nitrogen compound metabolic process			Coil (COILS); Coil (COILS); IPR012479 (PFAM); mobidb-lite (MOBIDB_LITE); mobidb-lite (MOBIDB_LITE); mobidb-lite (MOBIDB_LITE); mobidb-lite (MOBIDB_LITE); IPR012479 (PANTHER)	P:GO:0006355	P:regulation of transcription, DNA-templated
genemark-Pseudochromosome_1-processed-gene-19.25	uncharacterized protein FPRO_00632	1140	0.0	F:GO:0003674	F:molecular_function			IPR013087 (SMART); G3DSA:3.30.160.60 (GENE3D); mobidb-lite (MOBIDB_LITE); mobidb-lite (MOBIDB_LITE); mobidb-lite (MOBIDB_LITE); mobidb-lite (MOBIDB_LITE); mobidb-lite (MOBIDB_LITE); mobidb-lite (MOBIDB_LITE); mobidb-lite (MOBIDB_LITE); mobidb-lite (MOBIDB_LITE); mobidb-lite (MOBIDB_LITE); mobidb-lite (MOBIDB_LITE); mobidb-lite (MOBIDB_LITE); PTHR42031 (PANTHER); TRANSMEMBRANE (PHOBIUS); NON_CYTOP…	F:GO:0003676	F:nucleic acid binding
genemark-Pseudochromosome_1-processed-gene-28.48	related to TPC1-mitochondrial transport protein	323	0.0	C:GO:0005575; F:GO:0022857	C:cellular_component; F:transmembrane transporter activity			IPR002067 (PRINTS); IPR023395 (G3DSA:1.50.40.GENE3D); IPR018108 (PFAM); PTHR24089:SF59 (PANTHER); IPR040062 (PANTHER); IPR018108 (PROSITE_PROFILES); IPR018108 (PROSITE_PROFILES); IPR018108 (PROSITE_PROFILES); IPR023395 (SUPERFAMILY); TMhelix (TMHMM); TMhelix (TMHMM)	F:GO:0022857; P:GO:0055085	F:transmembrane transporter activity; P:transmembrane transport
snap_masked-Pseudochromosome_1-processed-gene-30.29	hypothetical protein FNYG_09087	289	0.0					no IPS match	no IPS match	no IPS match
snap_masked-Pseudochromosome_1-processed-gene-26.13	-No description-	69						no IPS match	no IPS match	no IPS match
snap_masked-Pseudochromosome_1-processed-gene-27.52	ATP synthase subunit alpha, mitochondrial	568	0.0	C:GO:0005622; P:GO:0009058; F:GO:0016887; F:GO:0022857; C:GO:0032991; P:GO:0034641; F:GO:0043167; P:GO:0044281	C:intracellular; P:biosynthetic process; F:ATPase activity; F:transmembrane transporter activity; C:protein-containing complex; P:cellular nitrogen compound metabolic process; F:ion binding; P:small molecule metabolic process	EC:3.6.1.3; EC:3.6.1.15	Adenosinetriphosphatase; Nucleoside-triphosphate phosphatase	IPR004100 (PFAM); G3DSA:3.40.50.300 (GENE3D); IPR023366 (G3DSA:2.40.30.GENE3D); IPR000793 (PFAM); IPR038376 (G3DSA:1.20.150.GENE3D); IPR005294 (TIGRFAM); IPR000194 (PFAM); PTHR43089 (PANTHER); PTHR43089:SF5 (PANTHER); IPR005294 (HAMAP); IPR033732 (CDD); SSF47917 (SUPERFAMILY); IPR027417 (SUPERFAMILY); IPR036121 (SUPERFAMILY)	F:GO:0005524; P:GO:0015986; F:GO:0032559; C:GO:0045261; P:GO:0046034; F:GO:0046933; P:GO:1902600	F:ATP binding; P:ATP synthesis coupled proton transport; F:adenyl ribonucleotide binding; C:proton-transporting ATP synthase complex, catalytic core F(1); P:ATP metabolic process; F:proton-transporting ATP synthase activity, rotational mechanism; P:proton transmembrane transport
genemark-Pseudochromosome_1-processed-gene-22.20	hypothetical protein FVEG_01354	426	0.0	F:GO:0043167	F:ion binding			IPR001025 (SMART); IPR013083 (G3DSA:3.30.40.GENE3D); G3DSA:2.30.30.490 (GENE3D); mobidb-lite (MOBIDB_LITE); mobidb-lite (MOBIDB_LITE); mobidb-lite (MOBIDB_LITE); mobidb-lite (MOBIDB_LITE); mobidb-lite (MOBIDB_LITE); mobidb-lite (MOBIDB_LITE); PTHR12505:SF39 (PANTHER); PTHR12505 (PANTHER); IPR001025 (PROSITE_PROFILES); cd04370 (CDD); IPR011011 (SUPERFAMILY)	F:GO:0003682	F:chromatin binding
augustus_masked-Pseudochromosome_1-processed-gene-24.63	related to DNA mismatch repair protein PMS2	589	0.0	F:GO:0003677; C:GO:0005622; P:GO:0006259; P:GO:0006950; F:GO:0016887; C:GO:0032991; F:GO:0043167	F:DNA binding; C:intracellular; P:DNA metabolic process; P:response to stress; F:ATPase activity; C:protein-containing complex; F:ion binding	EC:3.6.1.3; EC:3.6.1.15	Adenosinetriphosphatase; Nucleoside-triphosphate phosphatase	IPR013507 (SMART); IPR014721 (G3DSA:3.30.230.GENE3D); IPR013507 (PFAM); IPR036890 (G3DSA:3.30.565.GENE3D); PF13589 (PFAM); mobidb-lite (MOBIDB_LITE); IPR038973 (PANTHER); PTHR10073:SF41 (PANTHER); cd03485 (CDD); IPR003594 (CDD); IPR020568 (SUPERFAMILY); IPR036890 (SUPERFAMILY)	F:GO:0005524; P:GO:0006298; F:GO:0016887; F:GO:0030983; C:GO:0032300	F:ATP binding; P:mismatch repair; F:ATPase activity; F:mismatched DNA binding; C:mismatch repair complex
genemark-Pseudochromosome_1-processed-gene-29.122	hypothetical protein FOMG_01081	328	0.0					Coil (COILS); mobidb-lite (MOBIDB_LITE); mobidb-lite (MOBIDB_LITE)	no GO terms	no GO terms
genemark-Pseudochromosome_1-processed-gene-26.77	related to LIM homeobox protein	584	0.0	F:GO:0003677; C:GO:0005634; P:GO:0009058; P:GO:0034641	F:DNA binding; C:nucleus; P:biosynthetic process; P:cellular nitrogen compound metabolic process			IPR001356 (SMART); IPR001356 (PFAM); G3DSA:1.10.10.60 (GENE3D); mobidb-lite (MOBIDB_LITE); mobidb-lite (MOBIDB_LITE); mobidb-lite (MOBIDB_LITE); mobidb-lite (MOBIDB_LITE); mobidb-lite (MOBIDB_LITE); mobidb-lite (MOBIDB_LITE); mobidb-lite (MOBIDB_LITE); mobidb-lite (MOBIDB_LITE); mobidb-lite (MOBIDB_LITE); PTHR24326 (PANTHER); PTHR24326:SF485 (PANTHER); IPR001356 (PROSITE_PROFILES); IPR001356 (CDD…	F:GO:0003677	F:DNA binding
genemark-Pseudochromosome_1-processed-gene-26.85	conidiation-specific expression protein	89	4.78834E-37					mobidb-lite (MOBIDB_LITE); mobidb-lite (MOBIDB_LITE)	no GO terms	no GO terms
genemark-Pseudochromosome_1-processed-gene-27.30	related to cell cycle arrest protein BUB2	482	0.0	P:GO:0051301	P:cell division			IPR000195 (SMART); IPR000195 (PFAM); G3DSA:1.10.472.80 (GENE3D); mobidb-lite (MOBIDB_LITE); mobidb-lite (MOBIDB_LITE); mobidb-lite (MOBIDB_LITE); mobidb-lite (MOBIDB_LITE); mobidb-lite (MOBIDB_LITE); PTHR22957:SF263 (PANTHER); PTHR22957 (PANTHER); IPR000195 (PROSITE_PROFILES); IPR035969 (SUPERFAMILY); IPR035969 (SUPERFAMILY); IPR035969 (SUPERFAMILY)	no GO terms	no GO terms
genemark-Pseudochromosome_1-processed-gene-27.41	SulP family sulfate permease	786	0.0	C:GO:0005575; F:GO:0022857	C:cellular_component; F:transmembrane transporter activity			IPR002645 (PFAM); IPR011547 (PFAM); mobidb-lite (MOBIDB_LITE); PTHR11814:SF80 (PANTHER); PTHR11814:SF80 (PANTHER); IPR001902 (PANTHER); TRANSMEMBRANE (PHOBIUS); TRANSMEMBRANE (PHOBIUS); NON_CYTOPLASMIC_DOMAIN (PHOBIUS); CYTOPLASMIC_DOMAIN (PHOBIUS); CYTOPLASMIC_DOMAIN (PHOBIUS); CYTOPLASMIC_DOMAIN (PHOBIUS); NON_CYTOPLASMIC_DOMAIN (PHOBIUS); TRANSMEMBRANE (PHOBIUS); CYTOPLASMIC_DOMAIN (PHOBIUS); …	F:GO:0008271; P:GO:0008272; F:GO:0015116; C:GO:0016020; C:GO:0016021; P:GO:0055085	F:secondary active sulfate transmembrane transporter activity; P:sulfate transport; F:sulfate transmembrane transporter activity; C:membrane; C:integral component of membrane; P:transmembrane transport
snap_masked-Pseudochromosome_1-processed-gene-30.33	hypothetical protein FVER14953_01107	364	0.0					G3DSA:3.30.710.10 (GENE3D); mobidb-lite (MOBIDB_LITE); mobidb-lite (MOBIDB_LITE); mobidb-lite (MOBIDB_LITE); IPR011333 (SUPERFAMILY)	no GO terms	no GO terms
genemark-Pseudochromosome_1-processed-gene-25.79	related to PPN1-vacuolar endopolyphosphatase	713	0.0	F:GO:0003674; C:GO:0005773	F:molecular_function; C:vacuole	EC:3.6.1.10	Endopolyphosphatase	Coil (COILS); Coil (COILS); IPR012358 (PIRSF); IPR029052 (G3DSA:3.60.21.GENE3D); mobidb-lite (MOBIDB_LITE); mobidb-lite (MOBIDB_LITE); mobidb-lite (MOBIDB_LITE); mobidb-lite (MOBIDB_LITE); mobidb-lite (MOBIDB_LITE); mobidb-lite (MOBIDB_LITE); mobidb-lite (MOBIDB_LITE); mobidb-lite (MOBIDB_LITE); PTHR10340 (PANTHER); PTHR10340:SF13 (PANTHER); SIGNAL_PEPTIDE_H_REGION (PHOBIUS); SIGNAL_PEPTIDE (PHOB…	F:GO:0000298; C:GO:0005773; C:GO:0016021	F:endopolyphosphatase activity; C:vacuole; C:integral component of membrane
augustus_masked-Pseudochromosome_1-processed-gene-24.52	related to ribonuclease H	722	0.0	F:GO:0003674	F:molecular_function			Coil (COILS); IPR013520 (SMART); IPR013520 (PFAM); IPR036397 (G3DSA:3.30.420.GENE3D); mobidb-lite (MOBIDB_LITE); mobidb-lite (MOBIDB_LITE); mobidb-lite (MOBIDB_LITE); mobidb-lite (MOBIDB_LITE); mobidb-lite (MOBIDB_LITE); mobidb-lite (MOBIDB_LITE); PTHR12801 (PANTHER); PTHR12801 (PANTHER); PTHR12801:SF86 (PANTHER); PTHR12801:SF86 (PANTHER); IPR034922 (CDD); IPR012337 (SUPERFAMILY)	F:GO:0003676	F:nucleic acid binding
genemark-Pseudochromosome_1-processed-gene-24.81	valyl-tRNA synthetase	317	0.0	F:GO:0016874; F:GO:0019843; P:GO:0022618; P:GO:0034641; P:GO:0042254	F:ligase activity; F:rRNA binding; P:ribonucleoprotein complex assembly; P:cellular nitrogen compound metabolic process; P:ribosome biogenesis			Coil (COILS); IPR007109 (SMART); IPR007109 (PFAM); mobidb-lite (MOBIDB_LITE); mobidb-lite (MOBIDB_LITE); IPR039770 (PANTHER); IPR007109 (PROSITE_PROFILES)	P:GO:0000027; P:GO:0000470; F:GO:0019843	P:ribosomal large subunit assembly; P:maturation of LSU-rRNA; F:rRNA binding
genemark-Pseudochromosome_1-processed-gene-17.40	ATP phosphoribosyltransferase	329	0.0	C:GO:0005737; P:GO:0006520; P:GO:0009058; F:GO:0016757; P:GO:0034641; F:GO:0043167	C:cytoplasm; P:cellular amino acid metabolic process; P:biosynthetic process; F:transferase activity, transferring glycosyl groups; P:cellular nitrogen compound metabolic process; F:ion binding	EC:2.4.2.17	ATP phosphoribosyltransferase	G3DSA:3.40.190.10 (GENE3D); IPR013115 (TIGRFAM); IPR013820 (TIGRFAM); G3DSA:3.40.190.10 (GENE3D); IPR013115 (PFAM); IPR013820 (PFAM); IPR015867 (G3DSA:3.30.70.GENE3D); IPR001348 (PANTHER); PTHR21403:SF0 (PANTHER); IPR020621 (HAMAP); SSF53850 (SUPERFAMILY); IPR011322 (SUPERFAMILY)	P:GO:0000105; F:GO:0000287; F:GO:0003879; C:GO:0005737	P:histidine biosynthetic process; F:magnesium ion binding; F:ATP phosphoribosyltransferase activity; C:cytoplasm
maker-Pseudochromosome_1-augustus-gene-17.13	AMP deaminase	1010	0.0	P:GO:0009058; F:GO:0016810; P:GO:0034641; P:GO:0044281	P:biosynthetic process; F:hydrolase activity, acting on carbon-nitrogen (but not peptide) bonds; P:cellular nitrogen compound metabolic process; P:small molecule metabolic process	EC:3.5.4.17; EC:3.5.4.6	Adenosine-phosphate deaminase; AMP deaminase	IPR001365 (PFAM); G3DSA:2.30.30.800 (GENE3D); IPR006329 (TIGRFAM); G3DSA:3.20.20.140 (GENE3D); mobidb-lite (MOBIDB_LITE); mobidb-lite (MOBIDB_LITE); mobidb-lite (MOBIDB_LITE); mobidb-lite (MOBIDB_LITE); mobidb-lite (MOBIDB_LITE); mobidb-lite (MOBIDB_LITE); mobidb-lite (MOBIDB_LITE); mobidb-lite (MOBIDB_LITE); mobidb-lite (MOBIDB_LITE); mobidb-lite (MOBIDB_LITE); IPR006329 (PANTHER); PTHR11359:SF0…	F:GO:0003876; F:GO:0019239; P:GO:0032264	F:AMP deaminase activity; F:deaminase activity; P:IMP salvage
genemark-Pseudochromosome_1-processed-gene-21.44	related to vegetatible incompatibility protein het-e-1	772	0.0	F:GO:0003674	F:molecular_function			IPR001680 (SMART); IPR015943 (G3DSA:2.130.10.GENE3D); mobidb-lite (MOBIDB_LITE); mobidb-lite (MOBIDB_LITE); mobidb-lite (MOBIDB_LITE); PTHR43991:SF7 (PANTHER); PTHR43991 (PANTHER); IPR017986 (PROSITE_PROFILES); IPR001680 (PROSITE_PROFILES); SignalP-TM (SIGNALP_GRAM_POSITIVE); IPR036322 (SUPERFAMILY)	F:GO:0005515	F:protein binding
snap_masked-Pseudochromosome_1-processed-gene-25.38	related to ribosomal protein YmL49	198	1.72229E-139	C:GO:0005840	C:ribosome			IPR028909 (PFAM); mobidb-lite (MOBIDB_LITE); IPR028909 (PANTHER); PTHR21349:SF0 (PANTHER); SignalP-TM (SIGNALP_GRAM_POSITIVE); IPR036164 (SUPERFAMILY)	C:GO:0005840	C:ribosome
genemark-Pseudochromosome_1-processed-gene-24.72	hypothetical protein FNYG_08976	455	0.0	F:GO:0003700; C:GO:0005634; P:GO:0009058; P:GO:0034641; F:GO:0043167	F:DNA-binding transcription factor activity; C:nucleus; P:biosynthetic process; P:cellular nitrogen compound metabolic process; F:ion binding			IPR001138 (SMART); IPR001138 (PFAM); IPR036864 (G3DSA:4.10.240.GENE3D); mobidb-lite (MOBIDB_LITE); IPR001138 (PROSITE_PROFILES); IPR001138 (CDD); IPR036864 (SUPERFAMILY)	F:GO:0000981; C:GO:0005634; P:GO:0006355; F:GO:0008270	F:DNA-binding transcription factor activity, RNA polymerase II-specific; C:nucleus; P:regulation of transcription, DNA-templated; F:zinc ion binding
genemark-Pseudochromosome_1-processed-gene-20.14	aromatic amino acid aminotransferase I	559	0.0	P:GO:0009058; F:GO:0043167	P:biosynthetic process; F:ion binding			IPR004839 (PFAM); IPR015421 (G3DSA:3.40.640.GENE3D); PTHR42790:SF10 (PANTHER); PTHR42790 (PANTHER); cd00609 (CDD); IPR015424 (SUPERFAMILY)	F:GO:0003824; P:GO:0009058; F:GO:0030170	F:catalytic activity; P:biosynthetic process; F:pyridoxal phosphate binding
genemark-Pseudochromosome_1-processed-gene-30.85	nucleolin	504	0.0	F:GO:0003723	F:RNA binding			IPR000504 (SMART); IPR012677 (G3DSA:3.30.70.GENE3D); IPR012677 (G3DSA:3.30.70.GENE3D); IPR000504 (PFAM); mobidb-lite (MOBIDB_LITE); mobidb-lite (MOBIDB_LITE); mobidb-lite (MOBIDB_LITE); mobidb-lite (MOBIDB_LITE); mobidb-lite (MOBIDB_LITE); mobidb-lite (MOBIDB_LITE); mobidb-lite (MOBIDB_LITE); mobidb-lite (MOBIDB_LITE); mobidb-lite (MOBIDB_LITE); mobidb-lite (MOBIDB_LITE); PTHR23236 (PANTHER); IPR…	F:GO:0003676	F:nucleic acid binding
genemark-Pseudochromosome_1-processed-gene-22.7	related to YOS1, subunit of the Yip1p-Yif1p Complex, required for Transport between the ER and th	90	7.51004E-46	C:GO:0005575	C:cellular_component			IPR013880 (PFAM); IPR013880 (PANTHER); PTHR15858:SF0 (PANTHER); SIGNAL_PEPTIDE (PHOBIUS); SIGNAL_PEPTIDE_N_REGION (PHOBIUS); SIGNAL_PEPTIDE_H_REGION (PHOBIUS); NON_CYTOPLASMIC_DOMAIN (PHOBIUS); SIGNAL_PEPTIDE_C_REGION (PHOBIUS); SignalP-noTM (SIGNALP_EUK); TMhelix (TMHMM)	no GO terms	no GO terms
maker-Pseudochromosome_1-snap-gene-30.2	Retrograde regulation protein 2	591	0.0					G3DSA:3.30.420.40 (GENE3D); IPR003695 (PFAM); G3DSA:3.30.420.150 (GENE3D); PTHR30005 (PANTHER); PTHR30005:SF0 (PANTHER); TRANSMEMBRANE (PHOBIUS); NON_CYTOPLASMIC_DOMAIN (PHOBIUS); CYTOPLASMIC_DOMAIN (PHOBIUS); SSF53067 (SUPERFAMILY); SSF53067 (SUPERFAMILY)	no GO terms	no GO terms
snap_masked-Pseudochromosome_1-processed-gene-17.84	related to ATP-dependent RNA helicase	776	0.0	F:GO:0004386; C:GO:0005730; P:GO:0034641; P:GO:0042254; F:GO:0043167	F:helicase activity; C:nucleolus; P:cellular nitrogen compound metabolic process; P:ribosome biogenesis; F:ion binding	EC:3.6.1.15	Nucleoside-triphosphate phosphatase	Coil (COILS); IPR014001 (SMART); IPR007502 (SMART); IPR001650 (SMART); IPR011545 (PFAM); IPR011709 (PFAM); IPR001650 (PFAM); IPR007502 (PFAM); G3DSA:3.40.50.300 (GENE3D); G3DSA:3.40.50.300 (GENE3D); G3DSA:1.20.120.1080 (GENE3D); mobidb-lite (MOBIDB_LITE); mobidb-lite (MOBIDB_LITE); mobidb-lite (MOBIDB_LITE); mobidb-lite (MOBIDB_LITE); PTHR18934:SF118 (PANTHER); PTHR18934 (PANTHER); IPR001650 (PRO…	F:GO:0003676; F:GO:0004386; F:GO:0005524	F:nucleic acid binding; F:helicase activity; F:ATP binding
genemark-Pseudochromosome_1-processed-gene-20.9	related to high-affinity phosphate permease, phosphate-repressible	706	0.0	C:GO:0005575; F:GO:0022857	C:cellular_component; F:transmembrane transporter activity			IPR005828 (PFAM); IPR011701 (PFAM); mobidb-lite (MOBIDB_LITE); mobidb-lite (MOBIDB_LITE); PTHR24064:SF337 (PANTHER); PTHR24064 (PANTHER); NON_CYTOPLASMIC_DOMAIN (PHOBIUS); TRANSMEMBRANE (PHOBIUS); TRANSMEMBRANE (PHOBIUS); TRANSMEMBRANE (PHOBIUS); CYTOPLASMIC_DOMAIN (PHOBIUS); CYTOPLASMIC_DOMAIN (PHOBIUS); NON_CYTOPLASMIC_DOMAIN (PHOBIUS); NON_CYTOPLASMIC_DOMAIN (PHOBIUS); CYTOPLASMIC_DOMAIN (PHOB…	C:GO:0016021; F:GO:0022857; P:GO:0055085	C:integral component of membrane; F:transmembrane transporter activity; P:transmembrane transport
genemark-Pseudochromosome_1-processed-gene-20.25	related to DUF1339 domain protein	1087	0.0	F:GO:0003674; C:GO:0005794; P:GO:0006810; C:GO:0032991	F:molecular_function; C:Golgi apparatus; P:transport; C:protein-containing complex			IPR001680 (SMART); IPR009771 (PFAM); mobidb-lite (MOBIDB_LITE); mobidb-lite (MOBIDB_LITE); mobidb-lite (MOBIDB_LITE); mobidb-lite (MOBIDB_LITE); IPR040096 (PANTHER); IPR011044 (SUPERFAMILY); IPR036322 (SUPERFAMILY)	F:GO:0005515; P:GO:0006886; C:GO:0034066	F:protein binding; P:intracellular protein transport; C:RIC1-RGP1 guanyl-nucleotide exchange factor complex
genemark-Pseudochromosome_1-processed-gene-24.83	hypothetical protein FOVG_01299	382	0.0					mobidb-lite (MOBIDB_LITE)	no GO terms	no GO terms
genemark-Pseudochromosome_1-processed-gene-26.88	related to TAF(II) complex (TBP-associated protein complex) component	231	3.60233E-149	C:GO:0005654; F:GO:0008135; C:GO:0032991	C:nucleoplasm; F:translation factor activity, RNA binding; C:protein-containing complex			IPR006565 (SMART); IPR006565 (PFAM); IPR009072 (G3DSA:1.10.20.GENE3D); mobidb-lite (MOBIDB_LITE); mobidb-lite (MOBIDB_LITE); mobidb-lite (MOBIDB_LITE); mobidb-lite (MOBIDB_LITE); PTHR12321 (PANTHER); IPR037815 (PTHR12321:PANTHER)	C:GO:0005669; F:GO:0046982	C:transcription factor TFIID complex; F:protein heterodimerization activity
genemark-Pseudochromosome_1-processed-gene-29.91	related to environmental pH response protein palF	856	0.0					IPR011022 (SMART); IPR011021 (PFAM); IPR014752 (G3DSA:2.60.40.GENE3D); mobidb-lite (MOBIDB_LITE); mobidb-lite (MOBIDB_LITE); mobidb-lite (MOBIDB_LITE); mobidb-lite (MOBIDB_LITE); mobidb-lite (MOBIDB_LITE); mobidb-lite (MOBIDB_LITE); mobidb-lite (MOBIDB_LITE); mobidb-lite (MOBIDB_LITE); mobidb-lite (MOBIDB_LITE); PTHR11188:SF84 (PANTHER); PTHR11188 (PANTHER); SignalP-TM (SIGNALP_GRAM_POSITIVE); IP…	no GO terms	no GO terms
genemark-Pseudochromosome_1-processed-gene-21.42	related to DNA repair family protein	325	0.0	F:GO:0008168; F:GO:0016491	F:methyltransferase activity; F:oxidoreductase activity			IPR027450 (PFAM); IPR037151 (G3DSA:2.60.120.GENE3D); PTHR31573 (PANTHER); IPR005123 (PROSITE_PROFILES); SSF51197 (SUPERFAMILY)	F:GO:0016491; P:GO:0055114	F:oxidoreductase activity; P:oxidation-reduction process
snap_masked-Pseudochromosome_1-processed-gene-28.18	hypothetical protein FPRO05_12759	756	0.0					mobidb-lite (MOBIDB_LITE); mobidb-lite (MOBIDB_LITE)	no GO terms	no GO terms
snap_masked-Pseudochromosome_1-processed-gene-20.47	-No description-	69						no IPS match	no IPS match	no IPS match
genemark-Pseudochromosome_1-processed-gene-30.96	related to cell cycle checkpoint protein RAD17	1290	0.0	C:GO:0005634; P:GO:0006259; P:GO:0006950; F:GO:0016491	C:nucleus; P:DNA metabolic process; P:response to stress; F:oxidoreductase activity			G3DSA:3.40.50.300 (GENE3D); IPR025337 (PFAM); PF03215 (PFAM); mobidb-lite (MOBIDB_LITE); mobidb-lite (MOBIDB_LITE); mobidb-lite (MOBIDB_LITE); mobidb-lite (MOBIDB_LITE); mobidb-lite (MOBIDB_LITE); mobidb-lite (MOBIDB_LITE); mobidb-lite (MOBIDB_LITE); IPR004582 (PANTHER); PTHR12172:SF0 (PANTHER); IPR027417 (SUPERFAMILY)	C:GO:0005634; P:GO:0006281; F:GO:0016491	C:nucleus; P:DNA repair; F:oxidoreductase activity
genemark-Pseudochromosome_1-processed-gene-25.88	protein arginine N-methyltransferase 1	345	0.0	P:GO:0006464; F:GO:0008168	P:cellular protein modification process; F:methyltransferase activity			PF06325 (PFAM); G3DSA:2.70.160.11 (GENE3D); G3DSA:3.40.50.150 (GENE3D); PTHR11006 (PANTHER); PTHR11006:SF74 (PANTHER); IPR025799 (PROSITE_PROFILES); cd02440 (CDD); IPR029063 (SUPERFAMILY)	P:GO:0006479; F:GO:0008168	P:protein methylation; F:methyltransferase activity
genemark-Pseudochromosome_1-processed-gene-25.101	UPF0592 membrane protein C7D4.03c	1209	0.0					IPR013887 (PFAM); mobidb-lite (MOBIDB_LITE); mobidb-lite (MOBIDB_LITE); mobidb-lite (MOBIDB_LITE); mobidb-lite (MOBIDB_LITE); mobidb-lite (MOBIDB_LITE); mobidb-lite (MOBIDB_LITE); mobidb-lite (MOBIDB_LITE); mobidb-lite (MOBIDB_LITE); mobidb-lite (MOBIDB_LITE); mobidb-lite (MOBIDB_LITE); mobidb-lite (MOBIDB_LITE); mobidb-lite (MOBIDB_LITE); mobidb-lite (MOBIDB_LITE); PTHR37988 (PANTHER)	no GO terms	no GO terms
genemark-Pseudochromosome_1-processed-gene-17.25	hypothetical protein FNYG_13078	134	8.39136E-91					IPR022024 (PFAM); mobidb-lite (MOBIDB_LITE); mobidb-lite (MOBIDB_LITE); mobidb-lite (MOBIDB_LITE); mobidb-lite (MOBIDB_LITE); PTHR34693:SF1 (PANTHER); PTHR34693 (PANTHER)	no GO terms	no GO terms
genemark-Pseudochromosome_1-processed-gene-23.16	glucosamine-fructose-6-phosphate aminotransferase	1088	0.0	C:GO:0005737; P:GO:0009056; P:GO:0009058; F:GO:0043167	C:cytoplasm; P:catabolic process; P:biosynthetic process; F:ion binding	EC:2.6.1.16	Glutamine--fructose-6-phosphate transaminase (isomerizing)	Coil (COILS); PR00830 (PRINTS); IPR003593 (SMART); G3DSA:1.10.8.60 (GENE3D); PF17862 (PFAM); IPR003959 (PFAM); PF13522 (PFAM); G3DSA:2.40.50.140 (GENE3D); G3DSA:3.40.50.10490 (GENE3D); IPR001347 (PFAM); IPR005937 (TIGRFAM); IPR032501 (PFAM); G3DSA:3.40.50.300 (GENE3D); IPR005855 (TIGRFAM); G3DSA:3.40.50.10490 (GENE3D); PTHR10937 (PANTHER); PTHR10937:SF10 (PANTHER); IPR001347 (PROSITE_PROFILES); I…	F:GO:0004360; F:GO:0005524; C:GO:0005737; F:GO:0016787; P:GO:0030163; F:GO:0097367; P:GO:1901135; P:GO:1901137	F:glutamine-fructose-6-phosphate transaminase (isomerizing) activity; F:ATP binding; C:cytoplasm; F:hydrolase activity; P:protein catabolic process; F:carbohydrate derivative binding; P:carbohydrate derivative metabolic process; P:carbohydrate derivative biosynthetic process
augustus_masked-Pseudochromosome_1-processed-gene-19.35	AGC protein kinase	1921	0.0	P:GO:0006464; P:GO:0007165; F:GO:0016301; F:GO:0043167	P:cellular protein modification process; P:signal transduction; F:kinase activity; F:ion binding	EC:2.7.11	Transferring phosphorus-containing groups	Coil (COILS); Coil (COILS); IPR000961 (SMART); IPR001789 (SMART); IPR000719 (SMART); G3DSA:3.40.50.2300 (GENE3D); G3DSA:1.10.510.10 (GENE3D); G3DSA:3.30.200.20 (GENE3D); IPR000719 (PFAM); G3DSA:1.10.510.10 (GENE3D); IPR001789 (PFAM); G3DSA:3.30.450.20 (GENE3D); IPR000014 (TIGRFAM); mobidb-lite (MOBIDB_LITE); mobidb-lite (MOBIDB_LITE); mobidb-lite (MOBIDB_LITE); mobidb-lite (MOBIDB_LITE); mobidb-l…	P:GO:0000160; F:GO:0004672; F:GO:0004674; F:GO:0005524; P:GO:0006468	P:phosphorelay signal transduction system; F:protein kinase activity; F:protein serine/threonine kinase activity; F:ATP binding; P:protein phosphorylation
snap_masked-Pseudochromosome_1-processed-gene-16.40	4-coumarate:coenzyme A ligase	111	1.01284E-73	C:GO:0005575; F:GO:0016874	C:cellular_component; F:ligase activity			no IPS match	no IPS match	no IPS match
snap_masked-Pseudochromosome_1-processed-gene-22.53	triacylglycerol lipase	405	0.0	F:GO:0003674; P:GO:0006629	F:molecular_function; P:lipid metabolic process			IPR002921 (PFAM); IPR029058 (G3DSA:3.40.50.GENE3D); PTHR21493 (PANTHER); PTHR21493:SF235 (PANTHER); SIGNAL_PEPTIDE_C_REGION (PHOBIUS); SIGNAL_PEPTIDE (PHOBIUS); SIGNAL_PEPTIDE_N_REGION (PHOBIUS); NON_CYTOPLASMIC_DOMAIN (PHOBIUS); SIGNAL_PEPTIDE_H_REGION (PHOBIUS); PS51257 (PROSITE_PROFILES); cd00519 (CDD); SignalP-TM (SIGNALP_EUK); IPR029058 (SUPERFAMILY)	P:GO:0006629	P:lipid metabolic process
genemark-Pseudochromosome_1-processed-gene-30.107	hypothetical protein FOQG_08480	845	0.0					IPR032675 (G3DSA:3.80.10.GENE3D); mobidb-lite (MOBIDB_LITE); mobidb-lite (MOBIDB_LITE); mobidb-lite (MOBIDB_LITE); mobidb-lite (MOBIDB_LITE); mobidb-lite (MOBIDB_LITE); mobidb-lite (MOBIDB_LITE); SSF52058 (SUPERFAMILY)	no GO terms	no GO terms
maker-Pseudochromosome_1-snap-gene-17.7	DUF1680 domain-containing protein	167	1.11733E-92	F:GO:0003674	F:molecular_function			IPR012878 (PFAM); PTHR43465 (PANTHER)	no GO terms	no GO terms
genemark-Pseudochromosome_1-processed-gene-29.85	related to alpha-L-rhamnosidase A	831	0.0	F:GO:0003674	F:molecular_function			IPR012341 (G3DSA:1.50.10.GENE3D); G3DSA:2.60.420.10 (GENE3D); IPR035398 (PFAM); G3DSA:2.60.120.560 (GENE3D); IPR035396 (PFAM); PTHR34987:SF3 (PANTHER); PTHR34987 (PANTHER); NON_CYTOPLASMIC_DOMAIN (PHOBIUS); SIGNAL_PEPTIDE (PHOBIUS); SIGNAL_PEPTIDE_H_REGION (PHOBIUS); SIGNAL_PEPTIDE_N_REGION (PHOBIUS); SIGNAL_PEPTIDE_C_REGION (PHOBIUS); SignalP-TM (SIGNALP_GRAM_POSITIVE); SignalP-noTM (SIGNALP_EUK…	F:GO:0003824	F:catalytic activity
genemark-Pseudochromosome_1-processed-gene-28.53	hypothetical protein FOXB_02211	391	0.0					G3DSA:3.30.160.60 (GENE3D); mobidb-lite (MOBIDB_LITE); mobidb-lite (MOBIDB_LITE); mobidb-lite (MOBIDB_LITE); mobidb-lite (MOBIDB_LITE); mobidb-lite (MOBIDB_LITE); mobidb-lite (MOBIDB_LITE); mobidb-lite (MOBIDB_LITE); mobidb-lite (MOBIDB_LITE)	no GO terms	no GO terms
genemark-Pseudochromosome_1-processed-gene-26.68	probable endochitinase	708	0.0	P:GO:0005975; F:GO:0016798	P:carbohydrate metabolic process; F:hydrolase activity, acting on glycosyl bonds			IPR011583 (SMART); IPR029070 (G3DSA:3.10.50.GENE3D); IPR001223 (PFAM); mobidb-lite (MOBIDB_LITE); mobidb-lite (MOBIDB_LITE); mobidb-lite (MOBIDB_LITE); mobidb-lite (MOBIDB_LITE); mobidb-lite (MOBIDB_LITE); PTHR11177:SF303 (PANTHER); PTHR11177 (PANTHER); SIGNAL_PEPTIDE_C_REGION (PHOBIUS); SIGNAL_PEPTIDE_H_REGION (PHOBIUS); SIGNAL_PEPTIDE_N_REGION (PHOBIUS); SIGNAL_PEPTIDE (PHOBIUS); NON_CYTOPLASMI…	P:GO:0005975; F:GO:0008061	P:carbohydrate metabolic process; F:chitin binding
genemark-Pseudochromosome_1-processed-gene-26.90	chromatin modification-like protein EAF6	162	1.27153E-114	C:GO:0005654; P:GO:0006464; C:GO:0032991; P:GO:0051276	C:nucleoplasm; P:cellular protein modification process; C:protein-containing complex; P:chromosome organization			Coil (COILS); IPR015418 (PFAM); mobidb-lite (MOBIDB_LITE); mobidb-lite (MOBIDB_LITE); mobidb-lite (MOBIDB_LITE); mobidb-lite (MOBIDB_LITE); IPR015418 (PANTHER)	C:GO:0000123; P:GO:0016573	C:histone acetyltransferase complex; P:histone acetylation
genemark-Pseudochromosome_1-processed-gene-21.50	related to PRP39-pre-mRNA splicing factor	587	0.0	F:GO:0003674; P:GO:0034641	F:molecular_function; P:cellular nitrogen compound metabolic process			IPR003107 (SMART); IPR011990 (G3DSA:1.25.40.GENE3D); IPR011990 (G3DSA:1.25.40.GENE3D); mobidb-lite (MOBIDB_LITE); mobidb-lite (MOBIDB_LITE); PTHR17204 (PANTHER); PTHR17204:SF5 (PANTHER); IPR011990 (SUPERFAMILY)	F:GO:0005515; P:GO:0006396	F:protein binding; P:RNA processing
genemark-Pseudochromosome_1-processed-gene-32.62	uncharacterized protein FFB14_03607	907	0.0	C:GO:0005575; P:GO:0055085	C:cellular_component; P:transmembrane transport			mobidb-lite (MOBIDB_LITE); mobidb-lite (MOBIDB_LITE); mobidb-lite (MOBIDB_LITE); mobidb-lite (MOBIDB_LITE); mobidb-lite (MOBIDB_LITE); mobidb-lite (MOBIDB_LITE); mobidb-lite (MOBIDB_LITE); mobidb-lite (MOBIDB_LITE); mobidb-lite (MOBIDB_LITE); mobidb-lite (MOBIDB_LITE); mobidb-lite (MOBIDB_LITE); mobidb-lite (MOBIDB_LITE); mobidb-lite (MOBIDB_LITE); PTHR16308 (PANTHER); PTHR16308:SF13 (PANTHER)	no GO terms	no GO terms
genemark-Pseudochromosome_1-processed-gene-25.105	phosphoacetylglucosamine mutase	537	0.0	P:GO:0005975; P:GO:0009058; F:GO:0016853; P:GO:0034641; F:GO:0043167; P:GO:0044281	P:carbohydrate metabolic process; P:biosynthetic process; F:isomerase activity; P:cellular nitrogen compound metabolic process; F:ion binding; P:small molecule metabolic process	EC:5.4.2.3	Phosphoacetylglucosamine mutase	G3DSA:3.30.310.50 (GENE3D); G3DSA:3.40.120.10 (GENE3D); IPR005844 (PFAM); IPR016657 (PIRSF); G3DSA:1.10.490.170 (GENE3D); IPR005843 (PFAM); PTHR22573 (PANTHER); PTHR22573:SF15 (PANTHER); IPR016657 (CDD); IPR016055 (SUPERFAMILY); IPR036900 (SUPERFAMILY); IPR016055 (SUPERFAMILY); IPR016055 (SUPERFAMILY)	F:GO:0004610; P:GO:0005975; F:GO:0016868; P:GO:0071704	F:phosphoacetylglucosamine mutase activity; P:carbohydrate metabolic process; F:intramolecular transferase activity, phosphotransferases; P:organic substance metabolic process
augustus_masked-Pseudochromosome_1-processed-gene-19.36	related to inorganic phosphate permease	670	0.0	C:GO:0005575; F:GO:0022857	C:cellular_component; F:transmembrane transporter activity			IPR005828 (PFAM); G3DSA:1.20.1250.20 (GENE3D); mobidb-lite (MOBIDB_LITE); mobidb-lite (MOBIDB_LITE); mobidb-lite (MOBIDB_LITE); PTHR24064 (PANTHER); PTHR24064:SF235 (PANTHER); TRANSMEMBRANE (PHOBIUS); TRANSMEMBRANE (PHOBIUS); NON_CYTOPLASMIC_DOMAIN (PHOBIUS); TRANSMEMBRANE (PHOBIUS); TRANSMEMBRANE (PHOBIUS); TRANSMEMBRANE (PHOBIUS); NON_CYTOPLASMIC_DOMAIN (PHOBIUS); NON_CYTOPLASMIC_DOMAIN (PHOBIU…	C:GO:0016021; F:GO:0022857; P:GO:0055085	C:integral component of membrane; F:transmembrane transporter activity; P:transmembrane transport
maker-Pseudochromosome_1-snap-gene-27.1	hypothetical protein FNYG_13368	114	2.4608E-37					mobidb-lite (MOBIDB_LITE)	no GO terms	no GO terms
genemark-Pseudochromosome_1-processed-gene-18.18	Pre-rRNA-processing protein PNO1	257	0.0	F:GO:0003723; C:GO:0005730; C:GO:0005737; P:GO:0042254	F:RNA binding; C:nucleolus; C:cytoplasm; P:ribosome biogenesis			IPR004087 (SMART); PF17903 (PFAM); IPR036612 (G3DSA:3.30.1370.GENE3D); mobidb-lite (MOBIDB_LITE); PTHR12826 (PANTHER); IPR039912 (PTHR12826:PANTHER); IPR036612 (SUPERFAMILY)	F:GO:0003676; F:GO:0003723	F:nucleic acid binding; F:RNA binding
genemark-Pseudochromosome_1-processed-gene-18.21	26S proteasome non-ATPase regulatory subunit 10	235	3.44093E-168	F:GO:0003674; C:GO:0005622; C:GO:0032991	F:molecular_function; C:intracellular; C:protein-containing complex			IPR002110 (PRINTS); IPR002110 (SMART); IPR036770 (G3DSA:1.25.40.GENE3D); IPR020683 (PFAM); IPR039334 (PANTHER); IPR020683 (PROSITE_PROFILES); IPR002110 (PROSITE_PROFILES); IPR002110 (PROSITE_PROFILES); IPR002110 (PROSITE_PROFILES); IPR002110 (PROSITE_PROFILES); IPR002110 (PROSITE_PROFILES); IPR002110 (PROSITE_PROFILES); IPR020683 (CDD); IPR020683 (CDD); IPR036770 (SUPERFAMILY)	F:GO:0005515	F:protein binding
snap_masked-Pseudochromosome_1-processed-gene-16.53	hypothetical protein FNYG_07633	302	0.0					Coil (COILS); mobidb-lite (MOBIDB_LITE); mobidb-lite (MOBIDB_LITE); SignalP-TM (SIGNALP_GRAM_POSITIVE)	no GO terms	no GO terms
genemark-Pseudochromosome_1-processed-gene-22.19	F-actin-capping protein subunit beta	282	0.0	C:GO:0005634; C:GO:0005737; C:GO:0005856; P:GO:0007010; F:GO:0008092; C:GO:0032991; P:GO:0065003	C:nucleus; C:cytoplasm; C:cytoskeleton; P:cytoskeleton organization; F:cytoskeletal protein binding; C:protein-containing complex; P:protein-containing complex assembly			Coil (COILS); IPR001698 (PRINTS); IPR001698 (PFAM); G3DSA:1.20.58.570 (GENE3D); G3DSA:2.40.160.80 (GENE3D); mobidb-lite (MOBIDB_LITE); IPR001698 (PANTHER); IPR037282 (SUPERFAMILY)	C:GO:0008290; P:GO:0051016	C:F-actin capping protein complex; P:barbed-end actin filament capping
genemark-Pseudochromosome_1-processed-gene-31.82	uncharacterized protein FMAN_00962	774	0.0					mobidb-lite (MOBIDB_LITE); mobidb-lite (MOBIDB_LITE); mobidb-lite (MOBIDB_LITE); mobidb-lite (MOBIDB_LITE); mobidb-lite (MOBIDB_LITE); mobidb-lite (MOBIDB_LITE); mobidb-lite (MOBIDB_LITE); mobidb-lite (MOBIDB_LITE); mobidb-lite (MOBIDB_LITE); mobidb-lite (MOBIDB_LITE); mobidb-lite (MOBIDB_LITE); mobidb-lite (MOBIDB_LITE); mobidb-lite (MOBIDB_LITE); mobidb-lite (MOBIDB_LITE); mobidb-lite (MOBIDB_L…	no GO terms	no GO terms
genemark-Pseudochromosome_1-processed-gene-22.30	predicted protein [	147	4.16841E-104					Coil (COILS)	no GO terms	no GO terms
genemark-Pseudochromosome_1-processed-gene-22.11	related to endoplasmic reticulum translocation complex chain SEC66	222	8.31662E-162	C:GO:0005737; C:GO:0005783; P:GO:0006605; C:GO:0032991; P:GO:0055085	C:cytoplasm; C:endoplasmic reticulum; P:protein targeting; C:protein-containing complex; P:transmembrane transport			IPR018624 (PFAM); mobidb-lite (MOBIDB_LITE); mobidb-lite (MOBIDB_LITE); IPR018624 (PANTHER); TRANSMEMBRANE (PHOBIUS); CYTOPLASMIC_DOMAIN (PHOBIUS); NON_CYTOPLASMIC_DOMAIN (PHOBIUS); TMhelix (TMHMM)	P:GO:0031204; C:GO:0031207	P:posttranslational protein targeting to membrane, translocation; C:Sec62/Sec63 complex
genemark-Pseudochromosome_1-processed-gene-17.38	related to nasopharyngeal carcinoma susceptibility protein LZ16	718	0.0	F:GO:0043167	F:ion binding			Coil (COILS); Coil (COILS); Coil (COILS); Coil (COILS); IPR001965 (SMART); IPR019787 (PFAM); IPR013083 (G3DSA:3.30.40.GENE3D); mobidb-lite (MOBIDB_LITE); mobidb-lite (MOBIDB_LITE); mobidb-lite (MOBIDB_LITE); mobidb-lite (MOBIDB_LITE); mobidb-lite (MOBIDB_LITE); mobidb-lite (MOBIDB_LITE); mobidb-lite (MOBIDB_LITE); mobidb-lite (MOBIDB_LITE); mobidb-lite (MOBIDB_LITE); mobidb-lite (MOBIDB_LITE); mo…	no GO terms	no GO terms
genemark-Pseudochromosome_1-processed-gene-17.16	Prefoldin subunit 1	66	8.3776E-37	P:GO:0006457; C:GO:0032991; F:GO:0051082	P:protein folding; C:protein-containing complex; F:unfolded protein binding			Coil (COILS); IPR009053 (G3DSA:1.10.287.GENE3D); SSF46579 (SUPERFAMILY)	no GO terms	no GO terms
maker-Pseudochromosome_1-snap-gene-28.68	pyridoxine kinase	323	0.0	P:GO:0009058; F:GO:0016301; P:GO:0034641; P:GO:0044281; P:GO:0051186	P:biosynthetic process; F:kinase activity; P:cellular nitrogen compound metabolic process; P:small molecule metabolic process; P:cofactor metabolic process	EC:2.7.1.35	Pyridoxal kinase	IPR029056 (G3DSA:3.40.1190.GENE3D); IPR013749 (PFAM); PTHR10534:SF2 (PANTHER); IPR004625 (PANTHER); SIGNAL_PEPTIDE (PHOBIUS); NON_CYTOPLASMIC_DOMAIN (PHOBIUS); SIGNAL_PEPTIDE_C_REGION (PHOBIUS); SIGNAL_PEPTIDE_H_REGION (PHOBIUS); SIGNAL_PEPTIDE_N_REGION (PHOBIUS); IPR004625 (CDD); IPR029056 (SUPERFAMILY)	F:GO:0008478; P:GO:0009443	F:pyridoxal kinase activity; P:pyridoxal 5'-phosphate salvage
snap_masked-Pseudochromosome_1-processed-gene-22.66	hypothetical protein FOXB_11674	516	0.0					Coil (COILS); Coil (COILS); mobidb-lite (MOBIDB_LITE); mobidb-lite (MOBIDB_LITE); mobidb-lite (MOBIDB_LITE); mobidb-lite (MOBIDB_LITE); mobidb-lite (MOBIDB_LITE)	no GO terms	no GO terms
snap_masked-Pseudochromosome_1-processed-gene-16.31	30S ribosomal protein S8	166	1.46562E-116	F:GO:0003735; C:GO:0005840; P:GO:0006412	F:structural constituent of ribosome; C:ribosome; P:translation			G3DSA:3.30.1490.10 (GENE3D); G3DSA:3.30.1370.30 (GENE3D); IPR000630 (PFAM); IPR000630 (PANTHER); PTHR11758:SF4 (PANTHER); IPR035987 (SUPERFAMILY)	F:GO:0003735; C:GO:0005840; P:GO:0006412	F:structural constituent of ribosome; C:ribosome; P:translation
snap_masked-Pseudochromosome_1-processed-gene-16.39	small nuclear ribonucleoprotein F	67	2.22064E-41	F:GO:0003723; C:GO:0005634; P:GO:0006397; P:GO:0022618; C:GO:0032991	F:RNA binding; C:nucleus; P:mRNA processing; P:ribonucleoprotein complex assembly; C:protein-containing complex			IPR001163 (SMART); IPR016487 (PIRSF); G3DSA:2.30.30.100 (GENE3D); IPR001163 (PFAM); PTHR11021:SF0 (PANTHER); IPR016487 (PANTHER); IPR034100 (CDD); IPR010920 (SUPERFAMILY)	P:GO:0000387; P:GO:0000398; C:GO:0005681; C:GO:0005732	P:spliceosomal snRNP assembly; P:mRNA splicing, via spliceosome; C:spliceosomal complex; C:small nucleolar ribonucleoprotein complex
genemark-Pseudochromosome_1-processed-gene-30.101	related to dehydrogenase/reductase	343	0.0					IPR002347 (PRINTS); G3DSA:3.40.50.720 (GENE3D); IPR002347 (PFAM); PTHR43157 (PANTHER); PTHR43157:SF1 (PANTHER); IPR036291 (SUPERFAMILY)	no GO terms	no GO terms
genemark-Pseudochromosome_1-processed-gene-31.98	related to carboxypeptidase Y-sorting protein PEP1 precursor	1516	0.0	C:GO:0005794; P:GO:0006810; F:GO:0008233	C:Golgi apparatus; P:transport; F:peptidase activity			IPR006581 (SMART); IPR031778 (PFAM); IPR031777 (PFAM); G3DSA:2.10.70.90 (GENE3D); G3DSA:2.10.70.80 (GENE3D); IPR015943 (G3DSA:2.130.10.GENE3D); mobidb-lite (MOBIDB_LITE); mobidb-lite (MOBIDB_LITE); mobidb-lite (MOBIDB_LITE); mobidb-lite (MOBIDB_LITE); PTHR12106 (PANTHER); PTHR12106:SF27 (PANTHER); SIGNAL_PEPTIDE_H_REGION (PHOBIUS); NON_CYTOPLASMIC_DOMAIN (PHOBIUS); TRANSMEMBRANE (PHOBIUS); CYTOPL…	F:GO:0005515; C:GO:0016021	F:protein binding; C:integral component of membrane
snap_masked-Pseudochromosome_1-processed-gene-25.12	hypothetical protein FOMG_00916	219	2.31656E-151	F:GO:0016829	F:lyase activity			IPR006913 (PFAM); G3DSA:3.90.1590.10 (GENE3D); PTHR33337:SF2 (PANTHER); PTHR33337:SF2 (PANTHER); PTHR33337 (PANTHER); IPR011057 (SUPERFAMILY); IPR011057 (SUPERFAMILY)	F:GO:0016846	F:carbon-sulfur lyase activity
genemark-Pseudochromosome_1-processed-gene-21.36	related to beta-glucosidase	610	0.0					G3DSA:3.20.20.80 (GENE3D); mobidb-lite (MOBIDB_LITE); mobidb-lite (MOBIDB_LITE); PTHR16631:SF24 (PANTHER); PTHR16631 (PANTHER); SIGNAL_PEPTIDE_C_REGION (PHOBIUS); NON_CYTOPLASMIC_DOMAIN (PHOBIUS); SIGNAL_PEPTIDE (PHOBIUS); SIGNAL_PEPTIDE_N_REGION (PHOBIUS); SIGNAL_PEPTIDE_H_REGION (PHOBIUS); SignalP-noTM (SIGNALP_GRAM_NEGATIVE); SignalP-noTM (SIGNALP_EUK); IPR017853 (SUPERFAMILY)	no GO terms	no GO terms
genemark-Pseudochromosome_1-processed-gene-29.113	60S ribosomal protein L35	125	4.53013E-84	F:GO:0003735; C:GO:0005840; P:GO:0006412	F:structural constituent of ribosome; C:ribosome; P:translation			Coil (COILS); IPR001854 (TIGRFAM); G3DSA:1.10.287.310 (GENE3D); IPR001854 (PFAM); G3DSA:1.10.20.90 (GENE3D); PTHR13872:SF36 (PANTHER); PTHR13872 (PANTHER); IPR001854 (HAMAP); cd00427 (CDD); IPR036049 (SUPERFAMILY)	F:GO:0003735; C:GO:0005622; C:GO:0005840; P:GO:0006412	F:structural constituent of ribosome; C:intracellular; C:ribosome; P:translation
augustus_masked-Pseudochromosome_1-processed-gene-31.65	hypothetical protein FOC4_g10015090	352	0.0					no IPS match	no IPS match	no IPS match
genemark-Pseudochromosome_1-processed-gene-23.8	related to nuclear localization protein NPL6	521	0.0	C:GO:0000228; C:GO:0032991	C:nuclear chromosome; C:protein-containing complex			IPR013933 (PFAM); mobidb-lite (MOBIDB_LITE); mobidb-lite (MOBIDB_LITE); PTHR22597 (PANTHER); PTHR22597:SF3 (PANTHER); IPR013933 (PRODOM)	no GO terms	no GO terms
snap_masked-Pseudochromosome_1-processed-gene-23.71	uncharacterized protein FRV6_04153	107	7.41809E-41	C:GO:0005575	C:cellular_component			mobidb-lite (MOBIDB_LITE); mobidb-lite (MOBIDB_LITE)	no GO terms	no GO terms
maker-Pseudochromosome_1-augustus-gene-29.1	2-oxoisovalerate dehydrogenase E2 component (dihydrolipoyl transacylase)	488	0.0	F:GO:0016746	F:transferase activity, transferring acyl groups			IPR004167 (PFAM); IPR036625 (G3DSA:4.10.320.GENE3D); G3DSA:2.40.50.100 (GENE3D); IPR000089 (PFAM); IPR023213 (G3DSA:3.30.559.GENE3D); IPR001078 (PFAM); mobidb-lite (MOBIDB_LITE); IPR015761 (PTHR43178:PANTHER); PTHR43178 (PANTHER); IPR004167 (PROSITE_PROFILES); IPR000089 (PROSITE_PROFILES); cd06849 (CDD); IPR036625 (SUPERFAMILY); IPR011053 (SUPERFAMILY); SSF52777 (SUPERFAMILY)	F:GO:0016746	F:transferase activity, transferring acyl groups
snap_masked-Pseudochromosome_1-processed-gene-20.51	-No description-	115						mobidb-lite (MOBIDB_LITE)	no GO terms	no GO terms
genemark-Pseudochromosome_1-processed-gene-26.71	related to arsenite-resistance protein 2	868	0.0	F:GO:0003674	F:molecular_function			Coil (COILS); Coil (COILS); IPR025239 (SMART); IPR007042 (PFAM); IPR021933 (PFAM); IPR025239 (PFAM); mobidb-lite (MOBIDB_LITE); mobidb-lite (MOBIDB_LITE); mobidb-lite (MOBIDB_LITE); mobidb-lite (MOBIDB_LITE); mobidb-lite (MOBIDB_LITE); mobidb-lite (MOBIDB_LITE); mobidb-lite (MOBIDB_LITE); mobidb-lite (MOBIDB_LITE); mobidb-lite (MOBIDB_LITE); PTHR21032:SF2 (PANTHER); IPR039249 (PANTHER)	no GO terms	no GO terms
genemark-Pseudochromosome_1-processed-gene-26.93	related to RRP46 protein, involved in rRNA processing	249	3.87171E-177					IPR001247 (PFAM); IPR027408 (G3DSA:3.30.230.GENE3D); PTHR11953 (PANTHER); PTHR11953:SF1 (PANTHER); cd11372 (CDD); IPR020568 (SUPERFAMILY); IPR036345 (SUPERFAMILY)	no GO terms	no GO terms
genemark-Pseudochromosome_1-processed-gene-18.1	related to diacylglycerol acyltransferase type 2a	501	0.0	C:GO:0005575; F:GO:0016746	C:cellular_component; F:transferase activity, transferring acyl groups			IPR007130 (PFAM); mobidb-lite (MOBIDB_LITE); mobidb-lite (MOBIDB_LITE); mobidb-lite (MOBIDB_LITE); PTHR12317 (PANTHER); PTHR12317:SF0 (PANTHER); NON_CYTOPLASMIC_DOMAIN (PHOBIUS); TRANSMEMBRANE (PHOBIUS); CYTOPLASMIC_DOMAIN (PHOBIUS); CYTOPLASMIC_DOMAIN (PHOBIUS); TRANSMEMBRANE (PHOBIUS); cd07987 (CDD); SSF69593 (SUPERFAMILY); TMhelix (TMHMM); TMhelix (TMHMM)	F:GO:0016747	F:transferase activity, transferring acyl groups other than amino-acyl groups
snap_masked-Pseudochromosome_1-processed-gene-19.59	hypothetical protein FOZG_00720	753	0.0	F:GO:0003723	F:RNA binding			IPR006630 (SMART); IPR006630 (PFAM); IPR036388 (G3DSA:1.10.10.GENE3D); mobidb-lite (MOBIDB_LITE); mobidb-lite (MOBIDB_LITE); mobidb-lite (MOBIDB_LITE); mobidb-lite (MOBIDB_LITE); mobidb-lite (MOBIDB_LITE); mobidb-lite (MOBIDB_LITE); mobidb-lite (MOBIDB_LITE); mobidb-lite (MOBIDB_LITE); mobidb-lite (MOBIDB_LITE); mobidb-lite (MOBIDB_LITE); mobidb-lite (MOBIDB_LITE); PTHR22792 (PANTHER); PTHR22792:…	no GO terms	no GO terms
snap_masked-Pseudochromosome_1-processed-gene-29.53	Pre-mRNA-processing ATP-dependent RNA helicase PRP5	1248	0.0	F:GO:0004386; F:GO:0043167	F:helicase activity; F:ion binding	EC:3.6.1.15	Nucleoside-triphosphate phosphatase	Coil (COILS); Coil (COILS); IPR001650 (SMART); IPR014001 (SMART); IPR011545 (PFAM); G3DSA:3.40.50.300 (GENE3D); IPR001650 (PFAM); G3DSA:3.40.50.300 (GENE3D); mobidb-lite (MOBIDB_LITE); mobidb-lite (MOBIDB_LITE); mobidb-lite (MOBIDB_LITE); mobidb-lite (MOBIDB_LITE); mobidb-lite (MOBIDB_LITE); mobidb-lite (MOBIDB_LITE); mobidb-lite (MOBIDB_LITE); mobidb-lite (MOBIDB_LITE); mobidb-lite (MOBIDB_LITE)…	F:GO:0003676; F:GO:0005524	F:nucleic acid binding; F:ATP binding
genemark-Pseudochromosome_1-processed-gene-20.12	50S ribosomal protein L2	372	0.0	F:GO:0003723; F:GO:0003735; C:GO:0005840; P:GO:0006412	F:RNA binding; F:structural constituent of ribosome; C:ribosome; P:translation			IPR022669 (SMART); IPR002171 (SMART); G3DSA:2.40.50.140 (GENE3D); IPR022669 (PFAM); IPR022666 (PFAM); IPR014726 (G3DSA:4.10.950.GENE3D); IPR005880 (TIGRFAM); IPR014722 (G3DSA:2.30.30.GENE3D); mobidb-lite (MOBIDB_LITE); mobidb-lite (MOBIDB_LITE); mobidb-lite (MOBIDB_LITE); PTHR13691:SF5 (PANTHER); IPR002171 (PANTHER); IPR008991 (SUPERFAMILY); IPR012340 (SUPERFAMILY)	F:GO:0003723; F:GO:0003735; C:GO:0005840; P:GO:0006412; C:GO:0015934; F:GO:0016740	F:RNA binding; F:structural constituent of ribosome; C:ribosome; P:translation; C:large ribosomal subunit; F:transferase activity
maker-Pseudochromosome_1-snap-gene-21.21	related to flavin oxidoreductase	419	0.0	F:GO:0016491; F:GO:0043167	F:oxidoreductase activity; F:ion binding			IPR013785 (G3DSA:3.20.20.GENE3D); IPR001155 (PFAM); mobidb-lite (MOBIDB_LITE); mobidb-lite (MOBIDB_LITE); PTHR43303:SF2 (PANTHER); PTHR43303 (PANTHER); cd02932 (CDD); SSF51395 (SUPERFAMILY)	F:GO:0003824; F:GO:0010181; F:GO:0016491; P:GO:0055114	F:catalytic activity; F:FMN binding; F:oxidoreductase activity; P:oxidation-reduction process
genemark-Pseudochromosome_1-processed-gene-20.18	hypothetical protein FVEG_01408	390	0.0	F:GO:0003735; C:GO:0005840; P:GO:0006412	F:structural constituent of ribosome; C:ribosome; P:translation			IPR018809 (PFAM); mobidb-lite (MOBIDB_LITE); mobidb-lite (MOBIDB_LITE); mobidb-lite (MOBIDB_LITE); mobidb-lite (MOBIDB_LITE); mobidb-lite (MOBIDB_LITE); mobidb-lite (MOBIDB_LITE); mobidb-lite (MOBIDB_LITE); mobidb-lite (MOBIDB_LITE); mobidb-lite (MOBIDB_LITE); PTHR28186 (PANTHER)	no GO terms	no GO terms
genemark-Pseudochromosome_1-processed-gene-28.50	related to isotrichodermin C-15 hydroxylase (cytochrome P-450 monooxygenase CYP65A1)	547	0.0	C:GO:0005575; F:GO:0016491; F:GO:0043167	C:cellular_component; F:oxidoreductase activity; F:ion binding			IPR002401 (PRINTS); IPR001128 (PRINTS); IPR036396 (G3DSA:1.10.630.GENE3D); IPR001128 (PFAM); PTHR24305:SF148 (PANTHER); PTHR24305 (PANTHER); SIGNAL_PEPTIDE (PHOBIUS); SIGNAL_PEPTIDE_N_REGION (PHOBIUS); NON_CYTOPLASMIC_DOMAIN (PHOBIUS); CYTOPLASMIC_DOMAIN (PHOBIUS); SIGNAL_PEPTIDE_C_REGION (PHOBIUS); SIGNAL_PEPTIDE_H_REGION (PHOBIUS); TRANSMEMBRANE (PHOBIUS); TRANSMEMBRANE (PHOBIUS); NON_CYTOPLASM…	F:GO:0005506; F:GO:0016705; F:GO:0020037; P:GO:0055114	F:iron ion binding; F:oxidoreductase activity, acting on paired donors, with incorporation or reduction of molecular oxygen; F:heme binding; P:oxidation-reduction process
genemark-Pseudochromosome_1-processed-gene-24.69	related to UPC2-regulatory protein involved in control of sterol uptake	491	0.0	F:GO:0003700; C:GO:0005634; P:GO:0009058; P:GO:0034641; F:GO:0043167	F:DNA-binding transcription factor activity; C:nucleus; P:biosynthetic process; P:cellular nitrogen compound metabolic process; F:ion binding			IPR001138 (SMART); IPR036864 (G3DSA:4.10.240.GENE3D); IPR001138 (PFAM); IPR021858 (PFAM); mobidb-lite (MOBIDB_LITE); mobidb-lite (MOBIDB_LITE); mobidb-lite (MOBIDB_LITE); PTHR31263 (PANTHER); PTHR31263:SF21 (PANTHER); IPR001138 (PROSITE_PROFILES); IPR001138 (CDD); SignalP-TM (SIGNALP_GRAM_POSITIVE); IPR036864 (SUPERFAMILY)	F:GO:0000981; C:GO:0005634; P:GO:0006355; F:GO:0008270	F:DNA-binding transcription factor activity, RNA polymerase II-specific; C:nucleus; P:regulation of transcription, DNA-templated; F:zinc ion binding
snap_masked-Pseudochromosome_1-processed-gene-26.36	18S rRNA biogenesis protein RCL1	404	0.0	F:GO:0003674; C:GO:0005730; P:GO:0034641; P:GO:0042254	F:molecular_function; C:nucleolus; P:cellular nitrogen compound metabolic process; P:ribosome biogenesis			IPR037136 (G3DSA:3.65.10.GENE3D); IPR016443 (TIGRFAM); IPR013791 (PFAM); IPR023797 (PFAM); IPR036553 (G3DSA:3.30.360.GENE3D); IPR016443 (PTHR11096:PANTHER); IPR000228 (PANTHER); PD397608 (PRODOM); IPR016443 (CDD); IPR013792 (SUPERFAMILY)	F:GO:0003824; C:GO:0005730; P:GO:0006396; P:GO:0042254	F:catalytic activity; C:nucleolus; P:RNA processing; P:ribosome biogenesis
snap_masked-Pseudochromosome_1-processed-gene-27.59	hypothetical protein FOXG_00318	173	3.27362E-123					IPR034660 (G3DSA:1.20.120.GENE3D); IPR018531 (PFAM); IPR018531 (PANTHER); IPR034660 (SUPERFAMILY)	no GO terms	no GO terms
augustus_masked-Pseudochromosome_1-processed-gene-17.48	related to Dor1-like family protein	688	0.0	C:GO:0005739; C:GO:0005794; F:GO:0022857; C:GO:0032991	C:mitochondrion; C:Golgi apparatus; F:transmembrane transporter activity; C:protein-containing complex			IPR007255 (PFAM); IPR018108 (PFAM); IPR023395 (G3DSA:1.50.40.GENE3D); IPR007255 (PANTHER); IPR018108 (PROSITE_PROFILES); IPR018108 (PROSITE_PROFILES); IPR030847 (HAMAP); IPR018108 (PROSITE_PROFILES); IPR023395 (SUPERFAMILY)	C:GO:0005743; F:GO:0015187; C:GO:0017119; P:GO:1904983	C:mitochondrial inner membrane; F:glycine transmembrane transporter activity; C:Golgi transport complex; P:glycine import into mitochondrion
maker-Pseudochromosome_1-augustus-gene-17.9	Reticulocyte-binding protein 2 like protein a	536	0.0					Coil (COILS); Coil (COILS); Coil (COILS); mobidb-lite (MOBIDB_LITE); mobidb-lite (MOBIDB_LITE); mobidb-lite (MOBIDB_LITE); mobidb-lite (MOBIDB_LITE); mobidb-lite (MOBIDB_LITE); mobidb-lite (MOBIDB_LITE); mobidb-lite (MOBIDB_LITE); mobidb-lite (MOBIDB_LITE)	no GO terms	no GO terms
genemark-Pseudochromosome_1-processed-gene-25.85	Sterol regulatory element-binding protein 2	407	0.0	F:GO:0003674; P:GO:0009058; P:GO:0034641	F:molecular_function; P:biosynthetic process; P:cellular nitrogen compound metabolic process			IPR011598 (SMART); IPR011598 (PFAM); IPR036638 (G3DSA:4.10.280.GENE3D); mobidb-lite (MOBIDB_LITE); mobidb-lite (MOBIDB_LITE); mobidb-lite (MOBIDB_LITE); mobidb-lite (MOBIDB_LITE); mobidb-lite (MOBIDB_LITE); mobidb-lite (MOBIDB_LITE); mobidb-lite (MOBIDB_LITE); mobidb-lite (MOBIDB_LITE); PTHR12565:SF51 (PANTHER); IPR024097 (PANTHER); IPR011598 (PROSITE_PROFILES); IPR011598 (CDD); IPR036638 (SUPERF…	P:GO:0006355; F:GO:0046983	P:regulation of transcription, DNA-templated; F:protein dimerization activity
genemark-Pseudochromosome_1-processed-gene-20.34	OPA3-like protein	212	1.9101E-148					Coil (COILS); IPR010754 (PFAM); mobidb-lite (MOBIDB_LITE); mobidb-lite (MOBIDB_LITE); IPR010754 (PANTHER); PTHR12499:SF0 (PANTHER); CYTOPLASMIC_DOMAIN (PHOBIUS); NON_CYTOPLASMIC_DOMAIN (PHOBIUS); TRANSMEMBRANE (PHOBIUS); cd00890 (CDD)	no GO terms	no GO terms
genemark-Pseudochromosome_1-processed-gene-22.24	related to zinc-binding protein	316	0.0	F:GO:0003674	F:molecular_function			IPR007051 (PFAM); IPR008978 (G3DSA:2.60.40.GENE3D); IPR007052 (PFAM); mobidb-lite (MOBIDB_LITE); mobidb-lite (MOBIDB_LITE); mobidb-lite (MOBIDB_LITE); IPR039790 (PANTHER); PTHR12621:SF9 (PANTHER); IPR007051 (PROSITE_PROFILES); IPR007052 (PROSITE_PROFILES); IPR007051 (PROSITE_PROFILES); cd06466 (CDD); IPR008978 (SUPERFAMILY)	no GO terms	no GO terms
augustus_masked-Pseudochromosome_1-processed-gene-26.57	phenylalanyl-tRNA synthetase alpha chain	521	0.0	F:GO:0003723; C:GO:0005737; P:GO:0006399; P:GO:0006412; P:GO:0006520; F:GO:0016874; C:GO:0032991; F:GO:0043167	F:RNA binding; C:cytoplasm; P:tRNA metabolic process; P:translation; P:cellular amino acid metabolic process; F:ligase activity; C:protein-containing complex; F:ion binding	EC:6.1.1.20; EC:3.1.1.1	Phenylalanine--tRNA ligase; Carboxylesterase	IPR002319 (PFAM); G3DSA:1.10.10.2330 (GENE3D); PF18553 (PFAM); IPR004529 (TIGRFAM); G3DSA:1.10.10.2320 (GENE3D); G3DSA:1.10.10.2310 (GENE3D); G3DSA:3.30.930.10 (GENE3D); mobidb-lite (MOBIDB_LITE); PTHR11538:SF40 (PANTHER); PTHR11538 (PANTHER); IPR006195 (PROSITE_PROFILES); cd00496 (CDD); SSF55681 (SUPERFAMILY)	F:GO:0000049; F:GO:0000166; F:GO:0004812; F:GO:0004826; F:GO:0005524; C:GO:0005737; P:GO:0006432; P:GO:0043039	F:tRNA binding; F:nucleotide binding; F:aminoacyl-tRNA ligase activity; F:phenylalanine-tRNA ligase activity; F:ATP binding; C:cytoplasm; P:phenylalanyl-tRNA aminoacylation; P:tRNA aminoacylation
genemark-Pseudochromosome_1-processed-gene-16.93	related to D-arabinitol 2-dehydrogenase	315	0.0					IPR002347 (PRINTS); IPR002347 (PRINTS); G3DSA:3.40.50.720 (GENE3D); PF13561 (PFAM); PTHR43008 (PANTHER); PTHR43008:SF4 (PANTHER); IPR036291 (SUPERFAMILY)	no GO terms	no GO terms
maker-Pseudochromosome_1-augustus-gene-21.4	uncharacterized protein FMAN_00659	767	0.0					Coil (COILS); mobidb-lite (MOBIDB_LITE); mobidb-lite (MOBIDB_LITE); mobidb-lite (MOBIDB_LITE); mobidb-lite (MOBIDB_LITE); mobidb-lite (MOBIDB_LITE); mobidb-lite (MOBIDB_LITE); mobidb-lite (MOBIDB_LITE); mobidb-lite (MOBIDB_LITE); mobidb-lite (MOBIDB_LITE); mobidb-lite (MOBIDB_LITE); mobidb-lite (MOBIDB_LITE); mobidb-lite (MOBIDB_LITE); mobidb-lite (MOBIDB_LITE)	no GO terms	no GO terms
genemark-Pseudochromosome_1-processed-gene-21.23	pro41 protein	154	3.11296E-89	C:GO:0005575	C:cellular_component			PTHR40629 (PANTHER); TRANSMEMBRANE (PHOBIUS); CYTOPLASMIC_DOMAIN (PHOBIUS); CYTOPLASMIC_DOMAIN (PHOBIUS); TRANSMEMBRANE (PHOBIUS); NON_CYTOPLASMIC_DOMAIN (PHOBIUS); TRANSMEMBRANE (PHOBIUS); CYTOPLASMIC_DOMAIN (PHOBIUS); NON_CYTOPLASMIC_DOMAIN (PHOBIUS); TRANSMEMBRANE (PHOBIUS); TMhelix (TMHMM); TMhelix (TMHMM); TMhelix (TMHMM)	no GO terms	no GO terms
genemark-Pseudochromosome_1-processed-gene-20.28	beta-N-acetylhexosaminidase	611	0.0	P:GO:0005975; F:GO:0016798	P:carbohydrate metabolic process; F:hydrolase activity, acting on glycosyl bonds	EC:3.2.1.52	Beta-N-acetylhexosaminidase	IPR025705 (PRINTS); IPR015883 (PFAM); IPR025705 (PIRSF); IPR029019 (PFAM); G3DSA:3.20.20.80 (GENE3D); PTHR22600 (PANTHER); PTHR22600:SF37 (PANTHER); SIGNAL_PEPTIDE (PHOBIUS); SIGNAL_PEPTIDE_C_REGION (PHOBIUS); SIGNAL_PEPTIDE_H_REGION (PHOBIUS); SIGNAL_PEPTIDE_N_REGION (PHOBIUS); NON_CYTOPLASMIC_DOMAIN (PHOBIUS); cd06562 (CDD); SignalP-noTM (SIGNALP_GRAM_NEGATIVE); SignalP-noTM (SIGNALP_EUK); Sign…	F:GO:0004553; F:GO:0004563; P:GO:0005975	F:hydrolase activity, hydrolyzing O-glycosyl compounds; F:beta-N-acetylhexosaminidase activity; P:carbohydrate metabolic process
genemark-Pseudochromosome_1-processed-gene-22.9	related to DUF962 domain protein	188	4.08791E-135	C:GO:0005575	C:cellular_component			IPR009305 (PFAM); PTHR28026:SF4 (PANTHER); IPR009305 (PANTHER); TRANSMEMBRANE (PHOBIUS); CYTOPLASMIC_DOMAIN (PHOBIUS); NON_CYTOPLASMIC_DOMAIN (PHOBIUS); CYTOPLASMIC_DOMAIN (PHOBIUS); TRANSMEMBRANE (PHOBIUS); TRANSMEMBRANE (PHOBIUS); CYTOPLASMIC_DOMAIN (PHOBIUS); NON_CYTOPLASMIC_DOMAIN (PHOBIUS); TRANSMEMBRANE (PHOBIUS); TRANSMEMBRANE (PHOBIUS); NON_CYTOPLASMIC_DOMAIN (PHOBIUS); TMhelix (TMHMM); T…	no GO terms	no GO terms
snap_masked-Pseudochromosome_1-processed-gene-18.82	hypothetical protein FNYG_06342	247	8.93031E-172	F:GO:0005198; C:GO:0005635; C:GO:0005768; P:GO:0006913; P:GO:0016192; C:GO:0032991; P:GO:0051276	F:structural molecule activity; C:nuclear envelope; C:endosome; P:nucleocytoplasmic transport; P:vesicle-mediated transport; C:protein-containing complex; P:chromosome organization			IPR009851 (PFAM); IPR029012 (G3DSA:1.10.287.GENE3D); mobidb-lite (MOBIDB_LITE); mobidb-lite (MOBIDB_LITE); PTHR13678:SF2 (PANTHER); IPR037859 (PANTHER); IPR009851 (PROSITE_PROFILES); IPR037202 (SUPERFAMILY)	C:GO:0000813; P:GO:0032509	C:ESCRT I complex; P:endosome transport via multivesicular body sorting pathway
genemark-Pseudochromosome_1-processed-gene-17.22	gpi-anchored protein	234	1.42625E-162					PTHR39599:SF1 (PANTHER); PTHR39599 (PANTHER); TRANSMEMBRANE (PHOBIUS); CYTOPLASMIC_DOMAIN (PHOBIUS); SIGNAL_PEPTIDE (PHOBIUS); SIGNAL_PEPTIDE_H_REGION (PHOBIUS); SIGNAL_PEPTIDE_C_REGION (PHOBIUS); SIGNAL_PEPTIDE_N_REGION (PHOBIUS); NON_CYTOPLASMIC_DOMAIN (PHOBIUS); SignalP-TM (SIGNALP_GRAM_POSITIVE); SignalP-noTM (SIGNALP_EUK)	no GO terms	no GO terms
genemark-Pseudochromosome_1-processed-gene-19.23	eukaryotic translation initiation factor 3 subunit D	576	0.0	F:GO:0003729; C:GO:0005737; F:GO:0008135; P:GO:0022618; C:GO:0032991	F:mRNA binding; C:cytoplasm; F:translation factor activity, RNA binding; P:ribonucleoprotein complex assembly; C:protein-containing complex			IPR007783 (PIRSF); IPR007783 (PFAM); mobidb-lite (MOBIDB_LITE); mobidb-lite (MOBIDB_LITE); mobidb-lite (MOBIDB_LITE); IPR007783 (PANTHER); IPR007783 (HAMAP)	F:GO:0003743; C:GO:0005737; C:GO:0005852	F:translation initiation factor activity; C:cytoplasm; C:eukaryotic translation initiation factor 3 complex
genemark-Pseudochromosome_1-processed-gene-17.44	related to component of histone acetyltransferase complex	438	0.0	C:GO:0005654; C:GO:0032991; F:GO:0043167; P:GO:0051276	C:nucleoplasm; C:protein-containing complex; F:ion binding; P:chromosome organization			IPR001965 (SMART); IPR024610 (SMART); IPR013083 (G3DSA:3.30.40.GENE3D); IPR024610 (PFAM); mobidb-lite (MOBIDB_LITE); mobidb-lite (MOBIDB_LITE); mobidb-lite (MOBIDB_LITE); mobidb-lite (MOBIDB_LITE); mobidb-lite (MOBIDB_LITE); mobidb-lite (MOBIDB_LITE); IPR037996 (PTHR10333:PANTHER); PTHR10333 (PANTHER); IPR019787 (PROSITE_PROFILES); cd15505 (CDD); IPR011011 (SUPERFAMILY)	C:GO:0035267	C:NuA4 histone acetyltransferase complex
maker-Pseudochromosome_1-snap-gene-18.91	related to COX19-required for expression of mitochondrial cytochrome oxidase	132	3.62599E-63	F:GO:0005507; C:GO:0005758; C:GO:0005829; P:GO:0030001; P:GO:0033617	F:copper ion binding; C:mitochondrial intermembrane space; C:cytosol; P:metal ion transport; P:mitochondrial respiratory chain complex IV assembly			mobidb-lite (MOBIDB_LITE); PTHR21107:SF2 (PANTHER); PTHR21107 (PANTHER); PS51808 (PROSITE_PROFILES)	no GO terms	no GO terms
snap_masked-Pseudochromosome_1-processed-gene-17.87	histone deacetylase HOS2	499	0.0	C:GO:0005634; P:GO:0006464; F:GO:0016810; F:GO:0043167; P:GO:0051276	C:nucleus; P:cellular protein modification process; F:hydrolase activity, acting on carbon-nitrogen (but not peptide) bonds; F:ion binding; P:chromosome organization	EC:3.5.1.98	Histone deacetylase	Coil (COILS); IPR003084 (PRINTS); IPR000286 (PRINTS); IPR023801 (PFAM); IPR003084 (PIRSF); IPR037138 (G3DSA:3.40.800.GENE3D); IPR000286 (PANTHER); PTHR10625:SF132 (PANTHER); IPR023696 (SUPERFAMILY)	F:GO:0004407; P:GO:0016575	F:histone deacetylase activity; P:histone deacetylation
snap_masked-Pseudochromosome_1-processed-gene-16.44	probable CDC40-cell division control protein	529	0.0	F:GO:0003674; C:GO:0005634; P:GO:0006397; C:GO:0032991; P:GO:0051301	F:molecular_function; C:nucleus; P:mRNA processing; C:protein-containing complex; P:cell division			IPR020472 (PRINTS); IPR001680 (SMART); IPR024977 (PFAM); IPR001680 (PFAM); IPR015943 (G3DSA:2.130.10.GENE3D); mobidb-lite (MOBIDB_LITE); mobidb-lite (MOBIDB_LITE); IPR032847 (PANTHER); IPR001680 (PROSITE_PROFILES); IPR001680 (PROSITE_PROFILES); IPR017986 (PROSITE_PROFILES); IPR001680 (PROSITE_PROFILES); IPR001680 (PROSITE_PROFILES); cd00200 (CDD); IPR036322 (SUPERFAMILY)	P:GO:0000398; F:GO:0005515; C:GO:0071013	P:mRNA splicing, via spliceosome; F:protein binding; C:catalytic step 2 spliceosome
genemark-Pseudochromosome_1-processed-gene-16.71	hypothetical protein FNYG_07621	494	0.0					SSF56399 (SUPERFAMILY)	no GO terms	no GO terms
genemark-Pseudochromosome_1-processed-gene-17.29	related to MNI1 Putative S-adenosylmethionine-dependent methyltransferase of the seven beta-strand family	360	0.0	F:GO:0008168	F:methyltransferase activity			Coil (COILS); mobidb-lite (MOBIDB_LITE); mobidb-lite (MOBIDB_LITE); PTHR14614:SF39 (PANTHER); PTHR14614 (PANTHER)	no GO terms	no GO terms
genemark-Pseudochromosome_1-processed-gene-17.32	related to cytoskeleton assembly control protein SLA1	1121	0.0	P:GO:0007010; F:GO:0008092; P:GO:0016192; F:GO:0030674; F:GO:0032182	P:cytoskeleton organization; F:cytoskeletal protein binding; P:vesicle-mediated transport; F:protein binding, bridging; F:ubiquitin-like protein binding			IPR001452 (PRINTS); IPR001452 (SMART); IPR001452 (PFAM); G3DSA:2.30.30.40 (GENE3D); IPR007131 (PFAM); G3DSA:2.30.30.40 (GENE3D); G3DSA:2.30.30.40 (GENE3D); G3DSA:1.10.150.50 (GENE3D); IPR013182 (PFAM); G3DSA:2.30.30.40 (GENE3D); IPR001452 (PFAM); IPR038159 (G3DSA:2.30.30.GENE3D); mobidb-lite (MOBIDB_LITE); mobidb-lite (MOBIDB_LITE); mobidb-lite (MOBIDB_LITE); mobidb-lite (MOBIDB_LITE); mobidb-lit…	F:GO:0005515; P:GO:0006897; P:GO:0007015; F:GO:0008092; F:GO:0030674; F:GO:0042802; F:GO:0043130	F:protein binding; P:endocytosis; P:actin filament organization; F:cytoskeletal protein binding; F:protein binding, bridging; F:identical protein binding; F:ubiquitin binding
genemark-Pseudochromosome_1-processed-gene-29.108	hypothetical protein FOVG_01112	611	0.0	C:GO:0005575	C:cellular_component			G3DSA:3.40.50.11350 (GENE3D); CYTOPLASMIC_DOMAIN (PHOBIUS); TRANSMEMBRANE (PHOBIUS); NON_CYTOPLASMIC_DOMAIN (PHOBIUS); TMhelix (TMHMM)	no GO terms	no GO terms
genemark-Pseudochromosome_1-processed-gene-21.45	threonyl-tRNA synthetase	761	0.0	C:GO:0005737; P:GO:0006399; P:GO:0006412; P:GO:0006520; F:GO:0016874; F:GO:0043167	C:cytoplasm; P:tRNA metabolic process; P:translation; P:cellular amino acid metabolic process; F:ligase activity; F:ion binding	EC:6.1.1.3	Threonine--tRNA ligase	IPR002320 (PRINTS); IPR012947 (SMART); IPR036621 (G3DSA:3.40.50.GENE3D); IPR012675 (G3DSA:3.10.20.GENE3D); IPR004095 (PFAM); G3DSA:3.30.980.10 (GENE3D); IPR004154 (PFAM); IPR002314 (PFAM); IPR012947 (PFAM); G3DSA:3.30.930.10 (GENE3D); IPR002320 (TIGRFAM); mobidb-lite (MOBIDB_LITE); mobidb-lite (MOBIDB_LITE); IPR002320 (PANTHER); PTHR11451:SF46 (PANTHER); IPR002320 (HAMAP); IPR006195 (PROSITE_PROF…	F:GO:0000166; F:GO:0004812; F:GO:0004829; F:GO:0005524; C:GO:0005737; P:GO:0006418; P:GO:0006435; P:GO:0043039	F:nucleotide binding; F:aminoacyl-tRNA ligase activity; F:threonine-tRNA ligase activity; F:ATP binding; C:cytoplasm; P:tRNA aminoacylation for protein translation; P:threonyl-tRNA aminoacylation; P:tRNA aminoacylation
genemark-Pseudochromosome_1-processed-gene-29.104	DNA replication complex GINS protein PSF1	214	1.24235E-156	C:GO:0000228; C:GO:0005654; P:GO:0006259; P:GO:0009058; C:GO:0032991	C:nuclear chromosome; C:nucleoplasm; P:DNA metabolic process; P:biosynthetic process; C:protein-containing complex			IPR021151 (PFAM); G3DSA:1.20.58.1030 (GENE3D); mobidb-lite (MOBIDB_LITE); IPR005339 (PANTHER); IPR005339 (CDD); IPR036224 (SUPERFAMILY)	C:GO:0000811; P:GO:0006260	C:GINS complex; P:DNA replication
genemark-Pseudochromosome_1-processed-gene-16.68	minor allergen Alt a 7	253	0.0	F:GO:0016491; F:GO:0043167	F:oxidoreductase activity; F:ion binding	EC:1.6.5.2	NAD(P)H dehydrogenase (quinone)	IPR010089 (TIGRFAM); IPR029039 (G3DSA:3.40.50.GENE3D); IPR005025 (PFAM); mobidb-lite (MOBIDB_LITE); mobidb-lite (MOBIDB_LITE); mobidb-lite (MOBIDB_LITE); PTHR30546 (PANTHER); PTHR30546:SF20 (PANTHER); IPR008254 (PROSITE_PROFILES); IPR029039 (SUPERFAMILY)	F:GO:0003955; F:GO:0010181; F:GO:0016491	F:NAD(P)H dehydrogenase (quinone) activity; F:FMN binding; F:oxidoreductase activity
snap_masked-Pseudochromosome_1-processed-gene-24.35	related to glutaredoxin	300	0.0	C:GO:0005623; P:GO:0006091; F:GO:0016491; P:GO:0042592	C:cell; P:generation of precursor metabolites and energy; F:oxidoreductase activity; P:homeostatic process			Coil (COILS); IPR014025 (PRINTS); IPR002109 (PFAM); G3DSA:3.40.30.10 (GENE3D); IPR011899 (TIGRFAM); mobidb-lite (MOBIDB_LITE); mobidb-lite (MOBIDB_LITE); mobidb-lite (MOBIDB_LITE); mobidb-lite (MOBIDB_LITE); PTHR10168 (PANTHER); PTHR10168:SF190 (PANTHER); NON_CYTOPLASMIC_DOMAIN (PHOBIUS); CYTOPLASMIC_DOMAIN (PHOBIUS); TRANSMEMBRANE (PHOBIUS); IPR002109 (PROSITE_PROFILES); cd03419 (CDD); IPR036249…	F:GO:0009055; F:GO:0015035; P:GO:0045454	F:electron transfer activity; F:protein disulfide oxidoreductase activity; P:cell redox homeostasis
snap_masked-Pseudochromosome_1-processed-gene-30.48	-No description-	96						SIGNAL_PEPTIDE_H_REGION (PHOBIUS); SIGNAL_PEPTIDE (PHOBIUS); SIGNAL_PEPTIDE_C_REGION (PHOBIUS); NON_CYTOPLASMIC_DOMAIN (PHOBIUS); SIGNAL_PEPTIDE_N_REGION (PHOBIUS); SignalP-noTM (SIGNALP_EUK)	no GO terms	no GO terms
snap_masked-Pseudochromosome_1-processed-gene-20.60	related to RNA polymerase II mediator complex protein pmc1	1010	0.0	C:GO:0005654; P:GO:0005975; P:GO:0009058; F:GO:0016491; C:GO:0032991; P:GO:0034641; P:GO:0044281; P:GO:0051186	C:nucleoplasm; P:carbohydrate metabolic process; P:biosynthetic process; F:oxidoreductase activity; C:protein-containing complex; P:cellular nitrogen compound metabolic process; P:small molecule metabolic process; P:cofactor metabolic process	EC:1.1.1.49	Glucose-6-phosphate dehydrogenase (NADP(+))	IPR013947 (PFAM); mobidb-lite (MOBIDB_LITE); IPR013947 (PANTHER)	F:GO:0003712; P:GO:0006357; C:GO:0016592	F:transcription coregulator activity; P:regulation of transcription by RNA polymerase II; C:mediator complex
snap_masked-Pseudochromosome_1-processed-gene-19.65	related to transcriptional repressor	315	0.0	F:GO:0003674	F:molecular_function			IPR013087 (SMART); G3DSA:3.30.160.60 (GENE3D); G3DSA:3.30.160.60 (GENE3D); mobidb-lite (MOBIDB_LITE); mobidb-lite (MOBIDB_LITE); mobidb-lite (MOBIDB_LITE); mobidb-lite (MOBIDB_LITE); mobidb-lite (MOBIDB_LITE); PTHR14003:SF1 (PANTHER); PTHR14003 (PANTHER); IPR013087 (PROSITE_PROFILES); IPR013087 (PROSITE_PROFILES); SSF81995 (SUPERFAMILY); IPR036236 (SUPERFAMILY)	F:GO:0003676	F:nucleic acid binding
genemark-Pseudochromosome_1-processed-gene-18.30	related to hydrogen peroxide-inducible protein hic-5	793	0.0	F:GO:0043167	F:ion binding			IPR001781 (SMART); G3DSA:2.10.110.10 (GENE3D); G3DSA:2.10.110.10 (GENE3D); IPR001781 (PFAM); G3DSA:2.10.110.10 (GENE3D); mobidb-lite (MOBIDB_LITE); mobidb-lite (MOBIDB_LITE); mobidb-lite (MOBIDB_LITE); mobidb-lite (MOBIDB_LITE); mobidb-lite (MOBIDB_LITE); mobidb-lite (MOBIDB_LITE); mobidb-lite (MOBIDB_LITE); mobidb-lite (MOBIDB_LITE); mobidb-lite (MOBIDB_LITE); mobidb-lite (MOBIDB_LITE); mobidb-l…	no GO terms	no GO terms
snap_masked-Pseudochromosome_1-processed-gene-27.78	MutT family protein	177	1.01124E-122	F:GO:0003674	F:molecular_function			IPR000086 (PFAM); G3DSA:3.90.79.10 (GENE3D); PTHR22769 (PANTHER); IPR000086 (PROSITE_PROFILES); IPR015797 (SUPERFAMILY)	F:GO:0016787	F:hydrolase activity
maker-Pseudochromosome_1-augustus-gene-26.1	UPF0655 protein C17G9.12c	302	0.0					PF12710 (PFAM); PTHR28181 (PANTHER); NON_CYTOPLASMIC_DOMAIN (PHOBIUS); SIGNAL_PEPTIDE (PHOBIUS); SIGNAL_PEPTIDE_H_REGION (PHOBIUS); SIGNAL_PEPTIDE_C_REGION (PHOBIUS); SIGNAL_PEPTIDE_N_REGION (PHOBIUS); cd01427 (CDD); SignalP-noTM (SIGNALP_EUK); IPR036412 (SUPERFAMILY)	no GO terms	no GO terms
genemark-Pseudochromosome_1-processed-gene-19.29	acetate kinase	414	0.0	C:GO:0005622; P:GO:0006790; P:GO:0009058; F:GO:0016301; P:GO:0034641; F:GO:0043167; P:GO:0044281; P:GO:0051186	C:intracellular; P:sulfur compound metabolic process; P:biosynthetic process; F:kinase activity; P:cellular nitrogen compound metabolic process; F:ion binding; P:small molecule metabolic process; P:cofactor metabolic process	EC:2.7.2.1	Acetate kinase	IPR000890 (PRINTS); IPR004372 (PIRSF); IPR004372 (TIGRFAM); G3DSA:3.30.420.40 (GENE3D); IPR000890 (PFAM); G3DSA:3.30.420.40 (GENE3D); IPR000890 (PANTHER); PTHR21060:SF15 (PANTHER); IPR004372 (HAMAP); SSF53067 (SUPERFAMILY); SSF53067 (SUPERFAMILY)	C:GO:0005622; P:GO:0006082; F:GO:0016301; P:GO:0016310; F:GO:0016774	C:intracellular; P:organic acid metabolic process; F:kinase activity; P:phosphorylation; F:phosphotransferase activity, carboxyl group as acceptor
genemark-Pseudochromosome_1-processed-gene-27.23	uncharacterized protein FPRN_00845	63	2.13734E-25					mobidb-lite (MOBIDB_LITE); mobidb-lite (MOBIDB_LITE)	no GO terms	no GO terms
genemark-Pseudochromosome_1-processed-gene-28.40	related to hnRNP protein E2	471	0.0	F:GO:0003723	F:RNA binding			IPR004087 (SMART); IPR036612 (G3DSA:3.30.1370.GENE3D); IPR004088 (PFAM); IPR036612 (G3DSA:3.30.1370.GENE3D); IPR036612 (G3DSA:3.30.1370.GENE3D); mobidb-lite (MOBIDB_LITE); mobidb-lite (MOBIDB_LITE); mobidb-lite (MOBIDB_LITE); mobidb-lite (MOBIDB_LITE); mobidb-lite (MOBIDB_LITE); PTHR10288 (PANTHER); PTHR10288:SF179 (PANTHER); PS50084 (PROSITE_PROFILES); PS50084 (PROSITE_PROFILES); PS50084 (PROSIT…	F:GO:0003676; F:GO:0003723	F:nucleic acid binding; F:RNA binding
genemark-Pseudochromosome_1-processed-gene-23.5	20S proteasome subunit beta 7	261	0.0	C:GO:0005634; C:GO:0005829; F:GO:0008233; P:GO:0009056; C:GO:0032991; P:GO:0065003	C:nucleus; C:cytosol; F:peptidase activity; P:catabolic process; C:protein-containing complex; P:protein-containing complex assembly	EC:3.4.25	Acting on peptide bonds (peptidases)	IPR029055 (G3DSA:3.60.20.GENE3D); IPR001353 (PFAM); IPR016295 (PIRSF); IPR016295 (PTHR11599:PANTHER); PTHR11599 (PANTHER); IPR023333 (PROSITE_PROFILES); IPR016295 (CDD); IPR029055 (SUPERFAMILY)	F:GO:0004298; C:GO:0005839; P:GO:0051603	F:threonine-type endopeptidase activity; C:proteasome core complex; P:proteolysis involved in cellular protein catabolic process
snap_masked-Pseudochromosome_1-processed-gene-31.31	zinc finger transcription factor ace1	776	0.0	F:GO:0003674	F:molecular_function			IPR013087 (SMART); G3DSA:3.30.160.60 (GENE3D); mobidb-lite (MOBIDB_LITE); mobidb-lite (MOBIDB_LITE); mobidb-lite (MOBIDB_LITE); mobidb-lite (MOBIDB_LITE); mobidb-lite (MOBIDB_LITE); PTHR14596:SF65 (PANTHER); PTHR14596 (PANTHER); IPR013087 (PROSITE_PROFILES)	F:GO:0003676	F:nucleic acid binding
maker-Pseudochromosome_1-augustus-gene-17.14	related to UDP N-acetylglucosamine transporter (MNN2)	413	0.0	C:GO:0005622; P:GO:0006464; F:GO:0030234; C:GO:0032991; P:GO:0055085	C:intracellular; P:cellular protein modification process; F:enzyme regulator activity; C:protein-containing complex; P:transmembrane transport			IPR013657 (PFAM); TIGR00803 (TIGRFAM); PTHR10778 (PANTHER); PTHR10778:SF4 (PANTHER); TRANSMEMBRANE (PHOBIUS); CYTOPLASMIC_DOMAIN (PHOBIUS); TRANSMEMBRANE (PHOBIUS); TRANSMEMBRANE (PHOBIUS); NON_CYTOPLASMIC_DOMAIN (PHOBIUS); NON_CYTOPLASMIC_DOMAIN (PHOBIUS); TRANSMEMBRANE (PHOBIUS); CYTOPLASMIC_DOMAIN (PHOBIUS); TRANSMEMBRANE (PHOBIUS); TRANSMEMBRANE (PHOBIUS); NON_CYTOPLASMIC_DOMAIN (PHOBIUS); CY…	P:GO:0055085	P:transmembrane transport
maker-Pseudochromosome_1-snap-gene-21.15	probable Found in Mitochondrial Proteome	78	1.76593E-49	C:GO:0005739; P:GO:0007005; P:GO:0065003	C:mitochondrion; P:mitochondrion organization; P:protein-containing complex assembly			IPR008011 (PFAM); IPR026868 (PANTHER); PTHR13675:SF1 (PANTHER)	no GO terms	no GO terms
snap_masked-Pseudochromosome_1-processed-gene-25.40	riboflavin synthase, alpha subunit	250	1.19463E-164					IPR001783 (PIRSF); IPR001783 (TIGRFAM); IPR023366 (G3DSA:2.40.30.GENE3D); IPR023366 (G3DSA:2.40.30.GENE3D); IPR026017 (PFAM); IPR001783 (PANTHER); PTHR21098:SF0 (PANTHER); IPR026017 (PROSITE_PROFILES); IPR026017 (PROSITE_PROFILES); IPR001783 (CDD); IPR017938 (SUPERFAMILY); IPR017938 (SUPERFAMILY)	no GO terms	no GO terms
genemark-Pseudochromosome_1-processed-gene-27.39	related to BEM3 GTPase-activating protein for Cdc42p and Rho1p	1499	0.0	P:GO:0007165; F:GO:0008289; F:GO:0030234; F:GO:0043167	P:signal transduction; F:lipid binding; F:enzyme regulator activity; F:ion binding			Coil (COILS); IPR001849 (SMART); IPR000198 (SMART); IPR008936 (G3DSA:1.10.555.GENE3D); IPR036871 (G3DSA:3.30.1520.GENE3D); IPR001849 (PFAM); IPR011993 (G3DSA:2.30.29.GENE3D); IPR000198 (PFAM); mobidb-lite (MOBIDB_LITE); mobidb-lite (MOBIDB_LITE); mobidb-lite (MOBIDB_LITE); mobidb-lite (MOBIDB_LITE); mobidb-lite (MOBIDB_LITE); mobidb-lite (MOBIDB_LITE); mobidb-lite (MOBIDB_LITE); mobidb-lite (MOBI…	P:GO:0007165; F:GO:0035091	P:signal transduction; F:phosphatidylinositol binding
genemark-Pseudochromosome_1-processed-gene-30.97	related to esterase	247	3.80584E-178	F:GO:0003674	F:molecular_function			IPR036514 (G3DSA:3.40.50.GENE3D); IPR013830 (PFAM); PTHR30383:SF12 (PANTHER); PTHR30383 (PANTHER); cd00229 (CDD); SSF52266 (SUPERFAMILY)	no GO terms	no GO terms
snap_masked-Pseudochromosome_1-processed-gene-22.76	hypothetical protein FVER53263_01352	148	2.55375E-85					IPR022024 (PFAM); mobidb-lite (MOBIDB_LITE); mobidb-lite (MOBIDB_LITE); mobidb-lite (MOBIDB_LITE); mobidb-lite (MOBIDB_LITE); mobidb-lite (MOBIDB_LITE); PTHR34693:SF3 (PANTHER); PTHR34693 (PANTHER)	no GO terms	no GO terms
maker-Pseudochromosome_1-snap-gene-25.117	related to TRAPP subunit involved in targeting and fusion of ER to golgi transport vesicles	149	2.11697E-107	C:GO:0005622; P:GO:0016192; C:GO:0032991	C:intracellular; P:vesicle-mediated transport; C:protein-containing complex			IPR007233 (SMART); G3DSA:3.30.450.70 (GENE3D); IPR007233 (PFAM); IPR007233 (PANTHER); PTHR23249:SF15 (PANTHER); IPR011012 (SUPERFAMILY)	P:GO:0016192; C:GO:0030008	P:vesicle-mediated transport; C:TRAPP complex
genemark-Pseudochromosome_1-processed-gene-31.95	related to ATPases	1442	0.0	C:GO:0005575; P:GO:0006810; F:GO:0016887; F:GO:0043167; P:GO:0061024	C:cellular_component; P:transport; F:ATPase activity; F:ion binding; P:membrane organization	EC:3.6.1.3; EC:3.6.3.1; EC:3.6.1.15	Adenosinetriphosphatase; Phospholipid-translocating ATPase; Nucleoside-triphosphate phosphatase	IPR006539 (TIGRFAM); IPR032631 (PFAM); PF13246 (PFAM); PF00702 (PFAM); IPR032630 (PFAM); G3DSA:2.70.150.10 (GENE3D); PF00122 (PFAM); IPR023214 (G3DSA:3.40.50.GENE3D); IPR001757 (TIGRFAM); IPR023299 (G3DSA:3.40.1110.GENE3D); mobidb-lite (MOBIDB_LITE); mobidb-lite (MOBIDB_LITE); mobidb-lite (MOBIDB_LITE); mobidb-lite (MOBIDB_LITE); mobidb-lite (MOBIDB_LITE); mobidb-lite (MOBIDB_LITE); mobidb-lite (…	F:GO:0000166; F:GO:0000287; F:GO:0005524; P:GO:0015914; C:GO:0016021; F:GO:0140326	F:nucleotide binding; F:magnesium ion binding; F:ATP binding; P:phospholipid transport; C:integral component of membrane; F:ATPase-coupled intramembrane lipid transporter activity
genemark-Pseudochromosome_1-processed-gene-25.76	60S ribosomal protein L9-B	193	6.96435E-137	F:GO:0003735; C:GO:0005840; P:GO:0006412; F:GO:0019843	F:structural constituent of ribosome; C:ribosome; P:translation; F:rRNA binding			IPR020040 (PFAM); IPR000702 (PIRSF); IPR036789 (G3DSA:3.90.930.GENE3D); IPR036789 (G3DSA:3.90.930.GENE3D); IPR000702 (PANTHER); PTHR11655:SF16 (PANTHER); IPR036789 (SUPERFAMILY); IPR036789 (SUPERFAMILY)	F:GO:0003735; C:GO:0005840; P:GO:0006412; F:GO:0019843	F:structural constituent of ribosome; C:ribosome; P:translation; F:rRNA binding
snap_masked-Pseudochromosome_1-processed-gene-22.82	Uncharacterised protein	1064	2.77999E-50					mobidb-lite (MOBIDB_LITE); mobidb-lite (MOBIDB_LITE)	no GO terms	no GO terms
genemark-Pseudochromosome_1-processed-gene-25.98	hypothetical protein FOVG_01278	398	0.0	C:GO:0005575	C:cellular_component			mobidb-lite (MOBIDB_LITE); mobidb-lite (MOBIDB_LITE); mobidb-lite (MOBIDB_LITE); mobidb-lite (MOBIDB_LITE); mobidb-lite (MOBIDB_LITE); mobidb-lite (MOBIDB_LITE); SIGNAL_PEPTIDE_N_REGION (PHOBIUS); CYTOPLASMIC_DOMAIN (PHOBIUS); TRANSMEMBRANE (PHOBIUS); NON_CYTOPLASMIC_DOMAIN (PHOBIUS); SIGNAL_PEPTIDE_C_REGION (PHOBIUS); SIGNAL_PEPTIDE (PHOBIUS); TRANSMEMBRANE (PHOBIUS); SIGNAL_PEPTIDE_H_REGION (PH…	no GO terms	no GO terms
genemark-Pseudochromosome_1-processed-gene-18.24	Prolyl-tRNA synthetase	605	0.0	C:GO:0005737; P:GO:0006399; P:GO:0006412; P:GO:0006457; P:GO:0006520; F:GO:0016874; C:GO:0032991; F:GO:0043167; F:GO:0051082	C:cytoplasm; P:tRNA metabolic process; P:translation; P:protein folding; P:cellular amino acid metabolic process; F:ligase activity; C:protein-containing complex; F:ion binding; F:unfolded protein binding	EC:6.1.1.15	Proline--tRNA ligase	IPR002316 (PRINTS); IPR002314 (PFAM); IPR004154 (PFAM); IPR036621 (G3DSA:3.40.50.GENE3D); G3DSA:3.30.930.10 (GENE3D); G3DSA:3.30.930.10 (GENE3D); PTHR42753:SF3 (PANTHER); PTHR42753 (PANTHER); IPR006195 (PROSITE_PROFILES); SSF55681 (SUPERFAMILY); SSF52954 (SUPERFAMILY)	F:GO:0000166; F:GO:0004812; F:GO:0004827; F:GO:0005524; C:GO:0005737; P:GO:0006418; P:GO:0006433	F:nucleotide binding; F:aminoacyl-tRNA ligase activity; F:proline-tRNA ligase activity; F:ATP binding; C:cytoplasm; P:tRNA aminoacylation for protein translation; P:prolyl-tRNA aminoacylation
snap_masked-Pseudochromosome_1-processed-gene-27.62	DegT/DnrJ/EryC1/StrS family aminotransferase	171	1.36438E-90	F:GO:0016491	F:oxidoreductase activity			IPR015421 (G3DSA:3.40.640.GENE3D); IPR000653 (PFAM); PTHR30244:SF28 (PANTHER); IPR000653 (PANTHER); IPR015424 (SUPERFAMILY)	F:GO:0003824	F:catalytic activity
genemark-Pseudochromosome_1-processed-gene-25.111	related to density-regulated protein, translation initiation factor	200	3.35306E-140	C:GO:0005840; F:GO:0008135	C:ribosome; F:translation factor activity, RNA binding			Coil (COILS); IPR005873 (TIGRFAM); IPR001950 (PFAM); G3DSA:3.30.780.10 (GENE3D); IPR005872 (PANTHER); IPR001950 (PROSITE_PROFILES); cd11607 (CDD); IPR036877 (SUPERFAMILY)	F:GO:0003743; P:GO:0006413	F:translation initiation factor activity; P:translational initiation
genemark-Pseudochromosome_1-processed-gene-16.74	homoisocitrate dehydrogenase	356	0.0	C:GO:0005575; F:GO:0016491; F:GO:0043167	C:cellular_component; F:oxidoreductase activity; F:ion binding			IPR024084 (SMART); IPR024084 (PFAM); G3DSA:3.40.718.10 (GENE3D); PTHR11835 (PANTHER); PTHR11835:SF48 (PANTHER); SSF53659 (SUPERFAMILY)	F:GO:0016616; P:GO:0055114	F:oxidoreductase activity, acting on the CH-OH group of donors, NAD or NADP as acceptor; P:oxidation-reduction process
genemark-Pseudochromosome_1-processed-gene-29.86	ER membrane protein SH3	222	2.3407E-159	C:GO:0005575	C:cellular_component			IPR013248 (SMART); IPR013248 (PFAM); IPR013248 (PIRSF); mobidb-lite (MOBIDB_LITE); IPR013248 (PANTHER); TRANSMEMBRANE (PHOBIUS); CYTOPLASMIC_DOMAIN (PHOBIUS); NON_CYTOPLASMIC_DOMAIN (PHOBIUS); TRANSMEMBRANE (PHOBIUS); TRANSMEMBRANE (PHOBIUS); TRANSMEMBRANE (PHOBIUS); CYTOPLASMIC_DOMAIN (PHOBIUS); CYTOPLASMIC_DOMAIN (PHOBIUS); NON_CYTOPLASMIC_DOMAIN (PHOBIUS); TMhelix (TMHMM); TMhelix (TMHMM); TMh…	no GO terms	no GO terms
genemark-Pseudochromosome_1-processed-gene-27.17	probable SIS1 Heat shock protein	232	2.78535E-169	P:GO:0008150	P:biological_process			IPR001623 (PRINTS); IPR001623 (SMART); IPR001623 (PFAM); IPR036869 (G3DSA:1.10.287.GENE3D); mobidb-lite (MOBIDB_LITE); PTHR24074:SF12 (PANTHER); PTHR24074 (PANTHER); IPR001623 (PROSITE_PROFILES); IPR001623 (CDD); IPR036869 (SUPERFAMILY)	no GO terms	no GO terms
snap_masked-Pseudochromosome_1-processed-gene-18.79	hypothetical protein FOXG_00053	170	9.9918E-114					no IPS match	no IPS match	no IPS match
genemark-Pseudochromosome_1-processed-gene-24.78	20S proteasome subunit beta 6	264	0.0	C:GO:0005622; F:GO:0008233; P:GO:0009056; C:GO:0032991	C:intracellular; F:peptidase activity; P:catabolic process; C:protein-containing complex	EC:3.4.25	Acting on peptide bonds (peptidases)	IPR001353 (PFAM); IPR029055 (G3DSA:3.60.20.GENE3D); PTHR11599 (PANTHER); IPR035202 (PTHR11599:PANTHER); IPR023333 (PROSITE_PROFILES); cd03757 (CDD); IPR029055 (SUPERFAMILY)	F:GO:0004298; C:GO:0005839; P:GO:0051603	F:threonine-type endopeptidase activity; C:proteasome core complex; P:proteolysis involved in cellular protein catabolic process
genemark-Pseudochromosome_1-processed-gene-17.26	related to ER membrane protein complex subunit 6	118	1.38023E-77	C:GO:0005737; C:GO:0005783; C:GO:0032991	C:cytoplasm; C:endoplasmic reticulum; C:protein-containing complex			IPR029008 (PFAM); PTHR20994:SF0 (PANTHER); IPR008504 (PANTHER); NON_CYTOPLASMIC_DOMAIN (PHOBIUS); TRANSMEMBRANE (PHOBIUS); NON_CYTOPLASMIC_DOMAIN (PHOBIUS); CYTOPLASMIC_DOMAIN (PHOBIUS); TRANSMEMBRANE (PHOBIUS); TMhelix (TMHMM); TMhelix (TMHMM)	C:GO:0005783; C:GO:0016021; C:GO:0072546	C:endoplasmic reticulum; C:integral component of membrane; C:ER membrane protein complex
maker-Pseudochromosome_1-snap-gene-30.8	hypothetical protein FOYG_06945	280	6.21834E-82					mobidb-lite (MOBIDB_LITE); mobidb-lite (MOBIDB_LITE); mobidb-lite (MOBIDB_LITE); mobidb-lite (MOBIDB_LITE); mobidb-lite (MOBIDB_LITE); mobidb-lite (MOBIDB_LITE); NON_CYTOPLASMIC_DOMAIN (PHOBIUS); SIGNAL_PEPTIDE_C_REGION (PHOBIUS); SIGNAL_PEPTIDE (PHOBIUS); SIGNAL_PEPTIDE_H_REGION (PHOBIUS); SIGNAL_PEPTIDE_N_REGION (PHOBIUS); SignalP-noTM (SIGNALP_EUK); SignalP-noTM (SIGNALP_GRAM_NEGATIVE); Signal…	no GO terms	no GO terms
augustus_masked-Pseudochromosome_1-processed-gene-25.70	related to GIR2 Highly acidic protein with anomalous electrophoretic behavior	227	4.98852E-160	F:GO:0003674	F:molecular_function			Coil (COILS); Coil (COILS); IPR006575 (SMART); IPR016135 (G3DSA:3.10.110.GENE3D); IPR006575 (PFAM); mobidb-lite (MOBIDB_LITE); mobidb-lite (MOBIDB_LITE); IPR040213 (PANTHER); IPR006575 (PROSITE_PROFILES); IPR016135 (SUPERFAMILY)	F:GO:0005515	F:protein binding
augustus_masked-Pseudochromosome_1-processed-gene-23.42	related to splicing factor 3A subunit 2	560	0.0	C:GO:0005634; F:GO:0043167	C:nucleus; F:ion binding			SM01050 (SMART); IPR003604 (SMART); IPR015421 (G3DSA:3.40.640.GENE3D); IPR015422 (G3DSA:3.90.1150.GENE3D); IPR031781 (PFAM); PF12874 (PFAM); IPR005814 (PFAM); PTHR23205 (PANTHER); IPR000690 (PROSITE_PROFILES); IPR015424 (SUPERFAMILY)	F:GO:0003676; F:GO:0003824; C:GO:0005634; F:GO:0008270; F:GO:0008483; F:GO:0030170	F:nucleic acid binding; F:catalytic activity; C:nucleus; F:zinc ion binding; F:transaminase activity; F:pyridoxal phosphate binding
genemark-Pseudochromosome_1-processed-gene-30.108	related to DNA repair protein rad8	1134	0.0	F:GO:0043167	F:ion binding			IPR014001 (SMART); IPR000330 (PFAM); G3DSA:3.40.50.300 (GENE3D); IPR038718 (G3DSA:3.40.50.GENE3D); IPR001650 (PFAM); mobidb-lite (MOBIDB_LITE); mobidb-lite (MOBIDB_LITE); PTHR10799:SF886 (PANTHER); PTHR10799 (PANTHER); IPR001650 (PROSITE_PROFILES); IPR014001 (PROSITE_PROFILES); cd00046 (CDD); IPR001650 (CDD); IPR027417 (SUPERFAMILY); IPR027417 (SUPERFAMILY)	F:GO:0005524	F:ATP binding
genemark-Pseudochromosome_1-processed-gene-20.21	hypothetical protein AU210_000664	224	4.27498E-131					no IPS match	no IPS match	no IPS match
genemark-Pseudochromosome_1-processed-gene-29.95	related to metalloregulatory protein	632	0.0	F:GO:0003674	F:molecular_function			IPR013087 (SMART); G3DSA:3.30.160.60 (GENE3D); G3DSA:3.30.160.60 (GENE3D); G3DSA:3.30.160.60 (GENE3D); IPR013087 (PFAM); G3DSA:3.30.160.60 (GENE3D); G3DSA:3.30.160.60 (GENE3D); mobidb-lite (MOBIDB_LITE); mobidb-lite (MOBIDB_LITE); mobidb-lite (MOBIDB_LITE); mobidb-lite (MOBIDB_LITE); mobidb-lite (MOBIDB_LITE); PTHR44454 (PANTHER); IPR013087 (PROSITE_PROFILES); IPR013087 (PROSITE_PROFILES); IPR013…	F:GO:0003676	F:nucleic acid binding
genemark-Pseudochromosome_1-processed-gene-28.56	hypothetical protein FNYG_09035	537	0.0	C:GO:0005575	C:cellular_component			IPR032805 (PFAM); PTHR31595 (PANTHER); PTHR31595:SF1 (PANTHER); NON_CYTOPLASMIC_DOMAIN (PHOBIUS); TRANSMEMBRANE (PHOBIUS); TRANSMEMBRANE (PHOBIUS); CYTOPLASMIC_DOMAIN (PHOBIUS); TRANSMEMBRANE (PHOBIUS); CYTOPLASMIC_DOMAIN (PHOBIUS); NON_CYTOPLASMIC_DOMAIN (PHOBIUS); NON_CYTOPLASMIC_DOMAIN (PHOBIUS); NON_CYTOPLASMIC_DOMAIN (PHOBIUS); CYTOPLASMIC_DOMAIN (PHOBIUS); NON_CYTOPLASMIC_DOMAIN (PHOBIUS); …	no GO terms	no GO terms
genemark-Pseudochromosome_1-processed-gene-17.35	DNA mismatch repair protein MSH5	951	0.0	F:GO:0003677; P:GO:0006259; P:GO:0006950; F:GO:0043167	F:DNA binding; P:DNA metabolic process; P:response to stress; F:ion binding			IPR007696 (SMART); IPR000432 (SMART); IPR007696 (PFAM); IPR000432 (PFAM); G3DSA:1.10.1420.10 (GENE3D); G3DSA:1.10.1420.10 (GENE3D); IPR011184 (PIRSF); G3DSA:3.40.50.300 (GENE3D); mobidb-lite (MOBIDB_LITE); mobidb-lite (MOBIDB_LITE); mobidb-lite (MOBIDB_LITE); PTHR11361 (PANTHER); PTHR11361:SF20 (PANTHER); IPR036187 (SUPERFAMILY); IPR027417 (SUPERFAMILY)	F:GO:0005524; P:GO:0006298; F:GO:0030983	F:ATP binding; P:mismatch repair; F:mismatched DNA binding
genemark-Pseudochromosome_1-processed-gene-26.84	probable molybdenum cofactor sulfurase HxB protein	828	0.0	P:GO:0009058; F:GO:0016829; F:GO:0043167; P:GO:0051186	P:biosynthetic process; F:lyase activity; F:ion binding; P:cofactor metabolic process	EC:2.8.1.9	Molybdenum cofactor sulfurtransferase	IPR000192 (PFAM); IPR005303 (PFAM); IPR015421 (G3DSA:3.40.640.GENE3D); IPR005302 (PFAM); IPR015422 (G3DSA:3.90.1150.GENE3D); PTHR14237:SF19 (PANTHER); PTHR14237 (PANTHER); IPR028886 (HAMAP); IPR005302 (PROSITE_PROFILES); SSF141673 (SUPERFAMILY); IPR015424 (SUPERFAMILY)	F:GO:0003824; P:GO:0006777; F:GO:0008265; F:GO:0030151; F:GO:0030170	F:catalytic activity; P:Mo-molybdopterin cofactor biosynthetic process; F:Mo-molybdopterin cofactor sulfurase activity; F:molybdenum ion binding; F:pyridoxal phosphate binding
genemark-Pseudochromosome_1-processed-gene-23.10	uncharacterized protein LW93_10437	233	6.31318E-156					Coil (COILS); Coil (COILS); Coil (COILS); IPR019331 (PFAM); mobidb-lite (MOBIDB_LITE); mobidb-lite (MOBIDB_LITE); mobidb-lite (MOBIDB_LITE); mobidb-lite (MOBIDB_LITE); mobidb-lite (MOBIDB_LITE); mobidb-lite (MOBIDB_LITE); IPR039845 (PANTHER)	no GO terms	no GO terms
genemark-Pseudochromosome_1-processed-gene-22.21	autophagy-like protein 22	661	0.0	C:GO:0005773; P:GO:0006810; P:GO:0006914	C:vacuole; P:transport; P:autophagy			G3DSA:1.20.1250.20 (GENE3D); IPR024671 (PFAM); mobidb-lite (MOBIDB_LITE); mobidb-lite (MOBIDB_LITE); mobidb-lite (MOBIDB_LITE); mobidb-lite (MOBIDB_LITE); PTHR11360:SF96 (PANTHER); PTHR11360 (PANTHER); TRANSMEMBRANE (PHOBIUS); TRANSMEMBRANE (PHOBIUS); CYTOPLASMIC_DOMAIN (PHOBIUS); NON_CYTOPLASMIC_DOMAIN (PHOBIUS); NON_CYTOPLASMIC_DOMAIN (PHOBIUS); TRANSMEMBRANE (PHOBIUS); CYTOPLASMIC_DOMAIN (PHOB…	no GO terms	no GO terms
genemark-Pseudochromosome_1-processed-gene-16.96	related to transcription factor nirA	985	0.0	F:GO:0003677; F:GO:0003700; C:GO:0005634; P:GO:0009058; P:GO:0034641; F:GO:0043167	F:DNA binding; F:DNA-binding transcription factor activity; C:nucleus; P:biosynthetic process; P:cellular nitrogen compound metabolic process; F:ion binding			IPR001138 (SMART); IPR007219 (SMART); IPR001138 (PFAM); IPR007219 (PFAM); IPR036864 (G3DSA:4.10.240.GENE3D); mobidb-lite (MOBIDB_LITE); mobidb-lite (MOBIDB_LITE); mobidb-lite (MOBIDB_LITE); mobidb-lite (MOBIDB_LITE); mobidb-lite (MOBIDB_LITE); mobidb-lite (MOBIDB_LITE); mobidb-lite (MOBIDB_LITE); mobidb-lite (MOBIDB_LITE); mobidb-lite (MOBIDB_LITE); mobidb-lite (MOBIDB_LITE); mobidb-lite (MOBIDB_…	F:GO:0000981; F:GO:0003677; C:GO:0005634; P:GO:0006351; P:GO:0006355; F:GO:0008270	F:DNA-binding transcription factor activity, RNA polymerase II-specific; F:DNA binding; C:nucleus; P:transcription, DNA-templated; P:regulation of transcription, DNA-templated; F:zinc ion binding
genemark-Pseudochromosome_1-processed-gene-17.41	Uroporphyrinogen decarboxylase	366	0.0	P:GO:0009058; F:GO:0016829; P:GO:0034641; P:GO:0051186	P:biosynthetic process; F:lyase activity; P:cellular nitrogen compound metabolic process; P:cofactor metabolic process	EC:4.1.1.37	Uroporphyrinogen decarboxylase	IPR000257 (PFAM); IPR006361 (TIGRFAM); IPR038071 (G3DSA:3.20.20.GENE3D); PTHR21091 (PANTHER); PTHR21091:SF2 (PANTHER); IPR006361 (HAMAP); IPR006361 (CDD); IPR038071 (SUPERFAMILY)	F:GO:0004853; P:GO:0006779	F:uroporphyrinogen decarboxylase activity; P:porphyrin-containing compound biosynthetic process
snap_masked-Pseudochromosome_1-processed-gene-25.21	related to TPR domain protein	373	0.0	F:GO:0003674	F:molecular_function			IPR011990 (G3DSA:1.25.40.GENE3D); IPR011990 (G3DSA:1.25.40.GENE3D); PF13432 (PFAM); mobidb-lite (MOBIDB_LITE); mobidb-lite (MOBIDB_LITE); IPR019734 (PROSITE_PROFILES); IPR019734 (PROSITE_PROFILES); IPR013026 (PROSITE_PROFILES); IPR011990 (SUPERFAMILY)	F:GO:0005515	F:protein binding
genemark-Pseudochromosome_1-processed-gene-29.117	ADP-ribosylation factor	183	1.98448E-133	F:GO:0043167	F:ion binding			Coil (COILS); IPR006689 (PRINTS); IPR006689 (PRINTS); IPR006689 (PRINTS); IPR006689 (PRINTS); SM00178 (SMART); SM00177 (SMART); SM00175 (SMART); G3DSA:3.40.50.300 (GENE3D); IPR006689 (PFAM); IPR005225 (TIGRFAM); PTHR11711 (PANTHER); PTHR11711:SF182 (PANTHER); PS51417 (PROSITE_PROFILES); cd04150 (CDD); IPR027417 (SUPERFAMILY)	F:GO:0005525	F:GTP binding
genemark-Pseudochromosome_1-processed-gene-21.32	related to NUS1 Putative nuclear undecaprenyl pyrophosphate synthase	327	0.0	P:GO:0006629; P:GO:0009058; F:GO:0016765; C:GO:0032991; P:GO:0044281; P:GO:0048646	P:lipid metabolic process; P:biosynthetic process; F:transferase activity, transferring alkyl or aryl (other than methyl) groups; C:protein-containing complex; P:small molecule metabolic process; P:anatomical structure formation involved in morphogenesis			IPR036424 (G3DSA:3.40.1180.GENE3D); mobidb-lite (MOBIDB_LITE); IPR038887 (PANTHER); CYTOPLASMIC_DOMAIN (PHOBIUS); NON_CYTOPLASMIC_DOMAIN (PHOBIUS); TRANSMEMBRANE (PHOBIUS); IPR036424 (SUPERFAMILY); TMhelix (TMHMM)	P:GO:0001525; F:GO:0016765; P:GO:0019408; C:GO:1904423	P:angiogenesis; F:transferase activity, transferring alkyl or aryl (other than methyl) groups; P:dolichol biosynthetic process; C:dehydrodolichyl diphosphate synthase complex
snap_masked-Pseudochromosome_1-processed-gene-30.39	-No description-	83						TRANSMEMBRANE (PHOBIUS); CYTOPLASMIC_DOMAIN (PHOBIUS); NON_CYTOPLASMIC_DOMAIN (PHOBIUS)	no GO terms	no GO terms
genemark-Pseudochromosome_1-processed-gene-19.26	related to ethanolamine kinase	436	0.0	F:GO:0016301	F:kinase activity			G3DSA:3.30.200.20 (GENE3D); G3DSA:3.90.1200.10 (GENE3D); PF01633 (PFAM); mobidb-lite (MOBIDB_LITE); mobidb-lite (MOBIDB_LITE); mobidb-lite (MOBIDB_LITE); PTHR22603 (PANTHER); PTHR22603:SF66 (PANTHER); cd05157 (CDD); IPR011009 (SUPERFAMILY)	no GO terms	no GO terms
maker-Pseudochromosome_1-snap-gene-21.12	-No description-	171						no IPS match	no IPS match	no IPS match
genemark-Pseudochromosome_1-processed-gene-21.26	uncharacterized protein FPRO_00677	944	0.0	P:GO:0007165; F:GO:0019899	P:signal transduction; F:enzyme binding			IPR000219 (SMART); IPR000219 (PFAM); IPR035899 (G3DSA:1.20.900.GENE3D); IPR035899 (G3DSA:1.20.900.GENE3D); mobidb-lite (MOBIDB_LITE); mobidb-lite (MOBIDB_LITE); PTHR22826 (PANTHER); PTHR22826:SF194 (PANTHER); IPR000219 (PROSITE_PROFILES); IPR035899 (SUPERFAMILY)	F:GO:0005089; P:GO:0035023	F:Rho guanyl-nucleotide exchange factor activity; P:regulation of Rho protein signal transduction
genemark-Pseudochromosome_1-processed-gene-29.101	probable EMP24, component of the COPII-coated vesicles	203	9.21734E-151	C:GO:0005783; C:GO:0005794; P:GO:0016192; C:GO:0031410	C:endoplasmic reticulum; C:Golgi apparatus; P:vesicle-mediated transport; C:cytoplasmic vesicle			IPR009038 (SMART); IPR009038 (PFAM); IPR015720 (PANTHER); PTHR22811:SF31 (PANTHER); TRANSMEMBRANE (PHOBIUS); SIGNAL_PEPTIDE_N_REGION (PHOBIUS); SIGNAL_PEPTIDE (PHOBIUS); SIGNAL_PEPTIDE_H_REGION (PHOBIUS); NON_CYTOPLASMIC_DOMAIN (PHOBIUS); SIGNAL_PEPTIDE_C_REGION (PHOBIUS); CYTOPLASMIC_DOMAIN (PHOBIUS); IPR009038 (PROSITE_PROFILES); SignalP-noTM (SIGNALP_GRAM_NEGATIVE); SignalP-noTM (SIGNALP_EUK);…	no GO terms	no GO terms
genemark-Pseudochromosome_1-processed-gene-18.5	related to MDM31-Mitochondrial Distribution and Morphology	746	0.0	C:GO:0005739; P:GO:0006629; P:GO:0007005; P:GO:0042592	C:mitochondrion; P:lipid metabolic process; P:mitochondrion organization; P:homeostatic process			IPR012571 (PFAM); mobidb-lite (MOBIDB_LITE); mobidb-lite (MOBIDB_LITE); mobidb-lite (MOBIDB_LITE); mobidb-lite (MOBIDB_LITE); mobidb-lite (MOBIDB_LITE); PTHR31068:SF0 (PANTHER); IPR012571 (PANTHER); TRANSMEMBRANE (PHOBIUS); NON_CYTOPLASMIC_DOMAIN (PHOBIUS); TRANSMEMBRANE (PHOBIUS); CYTOPLASMIC_DOMAIN (PHOBIUS); NON_CYTOPLASMIC_DOMAIN (PHOBIUS); TMhelix (TMHMM); TMhelix (TMHMM)	P:GO:0000001; C:GO:0005743; P:GO:0007005	P:mitochondrion inheritance; C:mitochondrial inner membrane; P:mitochondrion organization
maker-Pseudochromosome_1-snap-gene-22.93	probable C-3 sterol dehydrogenase/3-beta-hydroxysteroid dehydrogenase and related dehydrogenases	613	0.0	F:GO:0003674; C:GO:0005575	F:molecular_function; C:cellular_component			G3DSA:3.40.50.720 (GENE3D); IPR001509 (PFAM); mobidb-lite (MOBIDB_LITE); mobidb-lite (MOBIDB_LITE); PTHR43245:SF11 (PANTHER); PTHR43245 (PANTHER); IPR036291 (SUPERFAMILY)	F:GO:0003824; F:GO:0050662	F:catalytic activity; F:coenzyme binding
genemark-Pseudochromosome_1-processed-gene-24.71	related to Protein esc1	490	0.0	F:GO:0003674	F:molecular_function			Coil (COILS); IPR011598 (SMART); IPR036638 (G3DSA:4.10.280.GENE3D); IPR011598 (PFAM); mobidb-lite (MOBIDB_LITE); mobidb-lite (MOBIDB_LITE); mobidb-lite (MOBIDB_LITE); mobidb-lite (MOBIDB_LITE); mobidb-lite (MOBIDB_LITE); mobidb-lite (MOBIDB_LITE); mobidb-lite (MOBIDB_LITE); mobidb-lite (MOBIDB_LITE); mobidb-lite (MOBIDB_LITE); PTHR22934:SF13 (PANTHER); PTHR22934 (PANTHER); IPR011598 (PROSITE_PROF…	F:GO:0046983	F:protein dimerization activity
genemark-Pseudochromosome_1-processed-gene-20.19	related to helicases of the Snf2/Rad54 family	816	0.0	F:GO:0004386; F:GO:0043167	F:helicase activity; F:ion binding	EC:3.6.1.15	Nucleoside-triphosphate phosphatase	IPR014001 (SMART); IPR001650 (SMART); G3DSA:3.40.50.300 (GENE3D); IPR001650 (PFAM); IPR000330 (PFAM); IPR038718 (G3DSA:3.40.50.GENE3D); mobidb-lite (MOBIDB_LITE); mobidb-lite (MOBIDB_LITE); mobidb-lite (MOBIDB_LITE); PTHR10799 (PANTHER); PTHR10799:SF845 (PANTHER); IPR014001 (PROSITE_PROFILES); IPR001650 (PROSITE_PROFILES); cd00046 (CDD); IPR001650 (CDD); IPR027417 (SUPERFAMILY); IPR027417 (SUPERF…	F:GO:0005524	F:ATP binding
maker-Pseudochromosome_1-snap-gene-20.7	casein kinase II subunit beta-2	256	0.0	C:GO:0005794; P:GO:0006464; P:GO:0006810; F:GO:0016301; F:GO:0030234; C:GO:0032991	C:Golgi apparatus; P:cellular protein modification process; P:transport; F:kinase activity; F:enzyme regulator activity; C:protein-containing complex			IPR000704 (PRINTS); IPR000704 (SMART); IPR016149 (G3DSA:1.10.1820.GENE3D); IPR000704 (PFAM); G3DSA:2.20.25.20 (GENE3D); PTHR11740:SF13 (PANTHER); IPR000704 (PANTHER); IPR035991 (SUPERFAMILY)	C:GO:0005956; F:GO:0019887	C:protein kinase CK2 complex; F:protein kinase regulator activity
genemark-Pseudochromosome_1-processed-gene-21.43	related to RNA-splicing regulatory protein phosphatase CYT-4, mitochondrial	1029	0.0	F:GO:0003723; F:GO:0004518	F:RNA binding; F:nuclease activity			IPR001900 (SMART); IPR001900 (PFAM); mobidb-lite (MOBIDB_LITE); mobidb-lite (MOBIDB_LITE); PTHR23355:SF42 (PANTHER); PTHR23355 (PANTHER); IPR012340 (SUPERFAMILY)	F:GO:0003723; F:GO:0004540	F:RNA binding; F:ribonuclease activity
genemark-Pseudochromosome_1-processed-gene-26.94	hypothetical protein FNYG_13382	513	0.0					mobidb-lite (MOBIDB_LITE); mobidb-lite (MOBIDB_LITE); mobidb-lite (MOBIDB_LITE); mobidb-lite (MOBIDB_LITE); mobidb-lite (MOBIDB_LITE); mobidb-lite (MOBIDB_LITE)	no GO terms	no GO terms
snap_masked-Pseudochromosome_1-processed-gene-28.19	hypothetical protein FOMG_01026	79	2.31444E-39	C:GO:0005575	C:cellular_component			no IPS match	no IPS match	no IPS match
genemark-Pseudochromosome_1-processed-gene-25.109	DNA-directed RNA polymerase II subunit RPB4	158	1.12422E-110	C:GO:0005622; P:GO:0009058; F:GO:0016779; C:GO:0032991; P:GO:0034641	C:intracellular; P:biosynthetic process; F:nucleotidyltransferase activity; C:protein-containing complex; P:cellular nitrogen compound metabolic process	EC:2.7.7.6	DNA-directed RNA polymerase	IPR006590 (SMART); IPR038324 (G3DSA:1.20.1250.GENE3D); IPR005574 (PFAM); mobidb-lite (MOBIDB_LITE); PTHR21297:SF0 (PANTHER); PTHR21297 (PANTHER); IPR010997 (SUPERFAMILY)	F:GO:0000166; F:GO:0003824; P:GO:0006352; C:GO:0030880; P:GO:0044237	F:nucleotide binding; F:catalytic activity; P:DNA-templated transcription, initiation; C:RNA polymerase complex; P:cellular metabolic process
snap_masked-Pseudochromosome_1-processed-gene-29.65	uncharacterized protein FFB14_03537	364	0.0					IPR018865 (PFAM); mobidb-lite (MOBIDB_LITE); mobidb-lite (MOBIDB_LITE); IPR018865 (PANTHER)	no GO terms	no GO terms
snap_masked-Pseudochromosome_1-processed-gene-21.68	-No description-	60						no IPS match	no IPS match	no IPS match
snap_masked-Pseudochromosome_1-processed-gene-22.81	uncharacterized protein LW93_10465	356	7.56333E-170					Coil (COILS); mobidb-lite (MOBIDB_LITE); mobidb-lite (MOBIDB_LITE); mobidb-lite (MOBIDB_LITE); mobidb-lite (MOBIDB_LITE); mobidb-lite (MOBIDB_LITE); mobidb-lite (MOBIDB_LITE); mobidb-lite (MOBIDB_LITE); mobidb-lite (MOBIDB_LITE); mobidb-lite (MOBIDB_LITE); SIGNAL_PEPTIDE_H_REGION (PHOBIUS); SIGNAL_PEPTIDE_C_REGION (PHOBIUS); SIGNAL_PEPTIDE (PHOBIUS); SIGNAL_PEPTIDE_N_REGION (PHOBIUS); NON_CYTOPLA…	no GO terms	no GO terms
genemark-Pseudochromosome_1-processed-gene-24.82	related to Zn-dependent oxidoreductases	375	0.0	F:GO:0016491	F:oxidoreductase activity			IPR020843 (SMART); IPR013149 (PFAM); G3DSA:3.90.180.10 (GENE3D); IPR013154 (PFAM); G3DSA:3.40.50.720 (GENE3D); PTHR45348 (PANTHER); cd08249 (CDD); IPR036291 (SUPERFAMILY); IPR011032 (SUPERFAMILY)	F:GO:0016491; P:GO:0055114	F:oxidoreductase activity; P:oxidation-reduction process
genemark-Pseudochromosome_1-processed-gene-17.34	protein phosphatase PP2A regulatory subunit B	479	0.0	P:GO:0000003; C:GO:0005634; C:GO:0005773; C:GO:0005829; C:GO:0005856; P:GO:0006464; P:GO:0006914; P:GO:0007010; P:GO:0007059; P:GO:0007165; P:GO:0009058; F:GO:0016791; P:GO:0022607; F:GO:0030234; C:GO:0032991; P:GO:0034641; P:GO:0051276; P:GO:0051301; P:GO:0055085; P:GO:0140014	P:reproduction; C:nucleus; C:vacuole; C:cytosol; C:cytoskeleton; P:cellular protein modification process; P:autophagy; P:cytoskeleton organization; P:chromosome segregation; P:signal transduction; P:biosynthetic process; F:phosphatase activity; P:cellular component assembly; F:enzyme regulator activity; C:protein-containing complex; P:cellular nitrogen compound metabolic process; P:chromosome org…	EC:3.1.3.16	Protein-serine/threonine phosphatase	IPR000009 (PRINTS); IPR000009 (PRINTS); IPR000009 (PRINTS); IPR000009 (PRINTS); IPR000009 (PRINTS); IPR000009 (PRINTS); IPR000009 (PRINTS); IPR000009 (PRINTS); IPR000009 (PRINTS); IPR000009 (PRINTS); IPR000009 (PRINTS); IPR001680 (SMART); IPR001680 (SMART); IPR001680 (SMART); IPR001680 (SMART); IPR001680 (SMART); IPR001680 (SMART); IPR001680 (PFAM); IPR000009 (PIRSF); IPR001680 (PFAM); mobidb-lit…	C:GO:0000159; F:GO:0005515; F:GO:0019888	C:protein phosphatase type 2A complex; F:protein binding; F:protein phosphatase regulator activity
genemark-Pseudochromosome_1-processed-gene-30.84	uncharacterized protein LW93_10236	406	0.0	C:GO:0005575	C:cellular_component			mobidb-lite (MOBIDB_LITE); mobidb-lite (MOBIDB_LITE); mobidb-lite (MOBIDB_LITE); mobidb-lite (MOBIDB_LITE); mobidb-lite (MOBIDB_LITE); mobidb-lite (MOBIDB_LITE); mobidb-lite (MOBIDB_LITE); mobidb-lite (MOBIDB_LITE); CYTOPLASMIC_DOMAIN (PHOBIUS); TRANSMEMBRANE (PHOBIUS); NON_CYTOPLASMIC_DOMAIN (PHOBIUS); TMhelix (TMHMM)	no GO terms	no GO terms
genemark-Pseudochromosome_1-processed-gene-17.23	related to voltage gated Ca2+ channel	2128	0.0	C:GO:0005886; F:GO:0022857; C:GO:0032991; F:GO:0043167	C:plasma membrane; F:transmembrane transporter activity; C:protein-containing complex; F:ion binding			Coil (COILS); G3DSA:1.10.287.70 (GENE3D); G3DSA:1.10.287.70 (GENE3D); IPR005821 (PFAM); IPR027359 (G3DSA:1.20.120.GENE3D); mobidb-lite (MOBIDB_LITE); mobidb-lite (MOBIDB_LITE); mobidb-lite (MOBIDB_LITE); mobidb-lite (MOBIDB_LITE); mobidb-lite (MOBIDB_LITE); mobidb-lite (MOBIDB_LITE); mobidb-lite (MOBIDB_LITE); mobidb-lite (MOBIDB_LITE); mobidb-lite (MOBIDB_LITE); mobidb-lite (MOBIDB_LITE); PTHR10…	F:GO:0005216; F:GO:0005509; P:GO:0006811; C:GO:0016020; P:GO:0055085	F:ion channel activity; F:calcium ion binding; P:ion transport; C:membrane; P:transmembrane transport
genemark-Pseudochromosome_1-processed-gene-30.95	uncharacterized protein FPRO_00984	1142	0.0					mobidb-lite (MOBIDB_LITE); mobidb-lite (MOBIDB_LITE); mobidb-lite (MOBIDB_LITE); mobidb-lite (MOBIDB_LITE); mobidb-lite (MOBIDB_LITE); mobidb-lite (MOBIDB_LITE); mobidb-lite (MOBIDB_LITE); mobidb-lite (MOBIDB_LITE); mobidb-lite (MOBIDB_LITE); mobidb-lite (MOBIDB_LITE); mobidb-lite (MOBIDB_LITE); mobidb-lite (MOBIDB_LITE); PTHR39601 (PANTHER); PTHR39601:SF2 (PANTHER); CYTOPLASMIC_DOMAIN (PHOBIUS);…	no GO terms	no GO terms
genemark-Pseudochromosome_1-processed-gene-21.24	Ca2+ transporting ATPase, sarcoplasmic/endoplasmic reticulum	997	0.0	C:GO:0005737; C:GO:0005783; F:GO:0016887; F:GO:0022857; F:GO:0043167	C:cytoplasm; C:endoplasmic reticulum; F:ATPase activity; F:transmembrane transporter activity; F:ion binding	EC:3.6.1.3; EC:3.6.3.8; EC:3.6.1.15	Adenosinetriphosphatase; Calcium-transporting ATPase; Nucleoside-triphosphate phosphatase	PR00121 (PRINTS); PR00119 (PRINTS); IPR004014 (SMART); PF00122 (PFAM); IPR023214 (G3DSA:3.40.50.GENE3D); IPR001757 (TIGRFAM); G3DSA:2.70.150.10 (GENE3D); PF00702 (PFAM); IPR005782 (TIGRFAM); IPR006068 (PFAM); G3DSA:2.70.150.10 (GENE3D); IPR023299 (G3DSA:3.40.1110.GENE3D); IPR004014 (PFAM); G3DSA:1.20.1110.10 (GENE3D),SFLDF00027 (SFLD),SFLDS00003 (SFLD); PTHR42861 (PANTHER); IPR030332 (PTHR42861:P…	F:GO:0000166; F:GO:0005388; F:GO:0005524; C:GO:0005783; P:GO:0006816; C:GO:0016021; C:GO:0033017; P:GO:0070588	F:nucleotide binding; F:calcium transmembrane transporter activity, phosphorylative mechanism; F:ATP binding; C:endoplasmic reticulum; P:calcium ion transport; C:integral component of membrane; C:sarcoplasmic reticulum membrane; P:calcium ion transmembrane transport
genemark-Pseudochromosome_1-processed-gene-22.8	related to cystathionine beta-synthase	170	7.1299E-119					G3DSA:3.10.580.10 (GENE3D); PTHR42115 (PANTHER); IPR000644 (PROSITE_PROFILES); IPR000644 (PROSITE_PROFILES); cd02205 (CDD); SSF54631 (SUPERFAMILY)	no GO terms	no GO terms
snap_masked-Pseudochromosome_1-processed-gene-16.60	uncharacterized protein FPRO_00549	64	1.26309E-23					no IPS match	no IPS match	no IPS match
snap_masked-Pseudochromosome_1-processed-gene-23.69	related to RNA binding protein Pym	192	9.02147E-126	P:GO:0008150	P:biological_process			Coil (COILS); IPR015362 (SMART); IPR015362 (PFAM); mobidb-lite (MOBIDB_LITE); mobidb-lite (MOBIDB_LITE); mobidb-lite (MOBIDB_LITE); IPR039333 (PANTHER); IPR036348 (SUPERFAMILY)	P:GO:1903259	P:exon-exon junction complex disassembly
maker-Pseudochromosome_1-augustus-gene-21.8	uncharacterized protein FFUJ_01445	139	4.62185E-34					no IPS match	no IPS match	no IPS match
genemark-Pseudochromosome_1-processed-gene-17.45	related to MFS amino acid transporter	585	0.0	C:GO:0005575; P:GO:0055085	C:cellular_component; P:transmembrane transport			IPR011701 (PFAM); PTHR20772 (PANTHER); PTHR20772:SF4 (PANTHER); TRANSMEMBRANE (PHOBIUS); NON_CYTOPLASMIC_DOMAIN (PHOBIUS); TRANSMEMBRANE (PHOBIUS); NON_CYTOPLASMIC_DOMAIN (PHOBIUS); NON_CYTOPLASMIC_DOMAIN (PHOBIUS); TRANSMEMBRANE (PHOBIUS); TRANSMEMBRANE (PHOBIUS); CYTOPLASMIC_DOMAIN (PHOBIUS); TRANSMEMBRANE (PHOBIUS); CYTOPLASMIC_DOMAIN (PHOBIUS); CYTOPLASMIC_DOMAIN (PHOBIUS); NON_CYTOPLASMIC_DO…	C:GO:0016021; P:GO:0055085	C:integral component of membrane; P:transmembrane transport
genemark-Pseudochromosome_1-processed-gene-24.90	uncharacterized protein FMAN_00763	894	0.0					Coil (COILS); mobidb-lite (MOBIDB_LITE); mobidb-lite (MOBIDB_LITE); mobidb-lite (MOBIDB_LITE); mobidb-lite (MOBIDB_LITE); mobidb-lite (MOBIDB_LITE); mobidb-lite (MOBIDB_LITE); mobidb-lite (MOBIDB_LITE); mobidb-lite (MOBIDB_LITE); mobidb-lite (MOBIDB_LITE); mobidb-lite (MOBIDB_LITE); mobidb-lite (MOBIDB_LITE); mobidb-lite (MOBIDB_LITE); mobidb-lite (MOBIDB_LITE); mobidb-lite (MOBIDB_LITE); mobidb-…	no GO terms	no GO terms
genemark-Pseudochromosome_1-processed-gene-30.92	uncharacterized protein FPRN_00934	649	0.0	F:GO:0008289; F:GO:0043167	F:lipid binding; F:ion binding			mobidb-lite (MOBIDB_LITE); mobidb-lite (MOBIDB_LITE); mobidb-lite (MOBIDB_LITE); mobidb-lite (MOBIDB_LITE); mobidb-lite (MOBIDB_LITE); mobidb-lite (MOBIDB_LITE); mobidb-lite (MOBIDB_LITE); mobidb-lite (MOBIDB_LITE); mobidb-lite (MOBIDB_LITE); mobidb-lite (MOBIDB_LITE); mobidb-lite (MOBIDB_LITE)	no GO terms	no GO terms
snap_masked-Pseudochromosome_1-processed-gene-30.24	uncharacterized protein FPRN_00917	313	0.0					IPR024500 (PFAM); PTHR40370 (PANTHER); SSF55961 (SUPERFAMILY)	no GO terms	no GO terms
snap_masked-Pseudochromosome_1-processed-gene-21.87	tyrosine 3-monooxygenase/tryptophan 5-monooxygenase activation protein	271	0.0	F:GO:0016491	F:oxidoreductase activity			IPR000308 (PRINTS); IPR023410 (SMART); IPR023410 (PFAM); IPR036815 (G3DSA:1.20.190.GENE3D); IPR000308 (PIRSF); mobidb-lite (MOBIDB_LITE); IPR000308 (PANTHER); PTHR18860:SF39 (PANTHER); IPR036815 (SUPERFAMILY)	F:GO:0019904	F:protein domain specific binding
snap_masked-Pseudochromosome_1-processed-gene-21.65	tRNA wybutosine-synthesizing protein 2	463	0.0	C:GO:0005634; C:GO:0005739; P:GO:0006399; F:GO:0008168	C:nucleus; C:mitochondrion; P:tRNA metabolic process; F:methyltransferase activity	EC:2.1.1.228	tRNA (guanine(37)-N(1))-methyltransferase	G3DSA:3.30.300.110 (GENE3D); IPR030382 (PFAM); PTHR23245 (PANTHER); PTHR23245:SF36 (PANTHER); IPR025792 (HAMAP); IPR030382 (PROSITE_PROFILES); IPR029063 (SUPERFAMILY)	F:GO:0009019; P:GO:0030488	F:tRNA (guanine-N1-)-methyltransferase activity; P:tRNA methylation
genemark-Pseudochromosome_1-processed-gene-29.92	L-lactate dehydrogenase (cytochrome)	511	0.0	P:GO:0005975; F:GO:0016491; F:GO:0016853; F:GO:0043167	P:carbohydrate metabolic process; F:oxidoreductase activity; F:isomerase activity; F:ion binding			IPR001199 (PRINTS); IPR001199 (SMART); IPR000262 (PFAM); IPR013785 (G3DSA:3.20.20.GENE3D); IPR001199 (PFAM); IPR036400 (G3DSA:3.10.120.GENE3D); mobidb-lite (MOBIDB_LITE); mobidb-lite (MOBIDB_LITE); PTHR10578:SF82 (PANTHER); PTHR10578 (PANTHER); IPR001199 (PROSITE_PROFILES); IPR037396 (PROSITE_PROFILES); IPR037458 (CDD); IPR036400 (SUPERFAMILY); SSF51395 (SUPERFAMILY)	F:GO:0003824; F:GO:0016491	F:catalytic activity; F:oxidoreductase activity
snap_masked-Pseudochromosome_1-processed-gene-28.27	anaphase-promoting complex subunit 2	866	0.0	P:GO:0009056; F:GO:0019899	P:catabolic process; F:enzyme binding			IPR016158 (SMART); IPR014786 (SMART); IPR014786 (PFAM); IPR001373 (PFAM); G3DSA:1.10.10.2620 (GENE3D); IPR036388 (G3DSA:1.10.10.GENE3D); mobidb-lite (MOBIDB_LITE); mobidb-lite (MOBIDB_LITE); mobidb-lite (MOBIDB_LITE); mobidb-lite (MOBIDB_LITE); PTHR11932 (PANTHER); PTHR11932:SF5 (PANTHER); TRANSMEMBRANE (PHOBIUS); CYTOPLASMIC_DOMAIN (PHOBIUS); NON_CYTOPLASMIC_DOMAIN (PHOBIUS); IPR016158 (PROSITE_…	P:GO:0006511; F:GO:0031625	P:ubiquitin-dependent protein catabolic process; F:ubiquitin protein ligase binding
snap_masked-Pseudochromosome_1-processed-gene-30.49	uncharacterized protein FPRN_00936	629	0.0					mobidb-lite (MOBIDB_LITE); mobidb-lite (MOBIDB_LITE); mobidb-lite (MOBIDB_LITE)	no GO terms	no GO terms
snap_masked-Pseudochromosome_1-processed-gene-24.36	uncharacterized protein FPRO_00783	88	4.28217E-49	C:GO:0005623; P:GO:0006091; F:GO:0016491; P:GO:0042592	C:cell; P:generation of precursor metabolites and energy; F:oxidoreductase activity; P:homeostatic process			mobidb-lite (MOBIDB_LITE); mobidb-lite (MOBIDB_LITE); NON_CYTOPLASMIC_DOMAIN (PHOBIUS); SIGNAL_PEPTIDE (PHOBIUS); SIGNAL_PEPTIDE_N_REGION (PHOBIUS); SIGNAL_PEPTIDE_H_REGION (PHOBIUS); SIGNAL_PEPTIDE_C_REGION (PHOBIUS); SignalP-TM (SIGNALP_GRAM_POSITIVE); SignalP-noTM (SIGNALP_EUK); SignalP-noTM (SIGNALP_GRAM_NEGATIVE)	no GO terms	no GO terms
snap_masked-Pseudochromosome_1-processed-gene-20.61	glucose-6-phosphate 1-dehydrogenase	500	0.0	C:GO:0005654; P:GO:0005975; P:GO:0006950; P:GO:0009058; F:GO:0016491; C:GO:0032991; P:GO:0034641; P:GO:0044281; P:GO:0051186	C:nucleoplasm; P:carbohydrate metabolic process; P:response to stress; P:biosynthetic process; F:oxidoreductase activity; C:protein-containing complex; P:cellular nitrogen compound metabolic process; P:small molecule metabolic process; P:cofactor metabolic process	EC:1.1.1.49	Glucose-6-phosphate dehydrogenase (NADP(+))	IPR001282 (PRINTS); IPR022674 (PFAM); G3DSA:3.40.50.720 (GENE3D); IPR001282 (PIRSF); G3DSA:3.30.360.10 (GENE3D); IPR022675 (PFAM); IPR001282 (TIGRFAM); IPR001282 (PANTHER); PTHR23429:SF0 (PANTHER); IPR001282 (HAMAP); IPR036291 (SUPERFAMILY); SSF55347 (SUPERFAMILY)	F:GO:0004345; P:GO:0006006; F:GO:0050661; P:GO:0055114	F:glucose-6-phosphate dehydrogenase activity; P:glucose metabolic process; F:NADP binding; P:oxidation-reduction process
[truncated: 14,688 more rows]
[truncated: 3 more columns]

## Sheet: Table S5
Table S5. Functional annotation of F. circinatum KS17 using Blast2GO.								0
Predicted gene	Description	Length (amino acids)	e-Value	GO IDs	GO Names	Enzyme Codes	Enzyme Names	InterPro IDs	InterPro GO IDs	InterPro GO Names
[truncated: 15,113 more rows]

## Sheet: Table S6
Table S6. Enrichment analysis of the accessory chromosome 12 of F. circinatum FSP34.
[truncated: 36 more rows]

[truncated: 5 more sheets: Table S7, Table S8, Table S9, Table S10, Table S11]
